# Supplementary material for: Transcriptomic Analysis of (Group I) Clostridium botulinum ATCC 3502 Cold Shock Response
Source: PLoS One. 2014 Feb 24;9(2):e89958. doi: 10.1371/journal.pone.0089958 (PMC3933689; doi:10.1371/journal.pone.0089958)
Supplement: Table S1 — Transcript fold changes of C. botulinum ATCC 3502 1 h and 5 h after temperature downshift from 37°C to 15°C. Tab 1 , All normalized transcript fold changes; Tabs 2 to 5, k-means clustering of significantly (FDR<0.05) >2.0 or <–2.0 log2 fold-affected genes; Tab 6, genes significantly (FDR<0.05) >2.0 or <−2.0 log2 fold-affected at 1 h after cold shock; Tab 7, genes significantly (FDR<0.05) >2.0 or <−2.0 log2 fold-affected at 5 h after cold shock; Tab 8, functional categories. (XLSX) [file pone.0089958.s001.xlsx]

## Sheet: 1. All data
locus_tag	EMBL	Classnum	Main class	Subclass	Product	Gene symbol	1h_log2	1h_p-value	1h_FDR	5h_log2	5h_p-value	5h_FDR
CBO0001	CAL81555	2.2.03	Macromolecule synthesis, modification	DNA - replication, repair, restriction/modification	chromosomal replication initiation protein	dnaA, dnaH, CBO0001	-0.312885	0.0305235	0.163723	-1.58323	5.28e-08	3.47e-07
CBO0002	CAL81556	2.2.03	Macromolecule synthesis, modification	DNA - replication, repair, restriction/modification	DNA polymerase III subunit beta	dnaN, dnaG, CBO0002	-0.199991	0.119652	0.400118	-1.31806	1.77e-09	1.75e-08
CBO0003	CAL81557	7.0.0	Not classified	Not classified (included putative assignments)	S4 domain-containing protein	CBO0003	-0.160804	0.496616	0.804626	-2.04497	4.08e-08	2.76e-07
CBO0004	CAL81558	2.2.03	Macromolecule synthesis, modification	DNA - replication, repair, restriction/modification	recombination protein F	recF, CBO0004	0.0152278	0.91753	0.980323	0.252614	0.134813	0.223698
CBO0005	CAL81559	0.0.02	Unknown function	Conserved in other than E.coli	hypothetical protein	CBO0005	0.130955	0.436116	0.764894	1.74845	7.87e-06	3.28e-05
CBO0006	CAL81560	2.2.03	Macromolecule synthesis, modification	DNA - replication, repair, restriction/modification	DNA gyrase subunit B	gyrB, CBO0006	0.0212965	0.877071	0.968516	-0.179952	0.201028	0.311191
CBO0007	CAL81561	2.2.03	Macromolecule synthesis, modification	DNA - replication, repair, restriction/modification	DNA gyrase subunit A	gyrA, CBO0007	0.070123	0.682311	0.896139	-0.278365	0.115447	0.196643
CBO0008	CAL81562	0.0.02	Unknown function	Conserved in other than E.coli	hypothetical protein	CBO0008	0.27374	0.0290596	0.158459	0.844969	6.74e-07	3.51e-06
CBO0009	CAL81563	7.0.0	Not classified	Not classified (included putative assignments)	transcriptional regulator	CBO0009	0.950929	0.0022151	0.0231622	1.10619	0.000162888	0.000537283
CBO0010	CAL81564	0.0.02	Unknown function	Conserved in other than E.coli	(Fe-S)-binding protein	CBO0010	0.653471	5.68396e-05	0.00134915	1.20925	1.18e-08	9.13e-08
CBO0011	CAL81565	4.1.06	Cell envelope	G+ membrane	hypothetical protein	CBO0011	0.713077	0.000640549	0.00909776	2.16614	6.52e-08	4.2e-07
CBO0012	CAL81566	4.1.07	Cell envelope	G+ exported/lipoprotein	ErfK/YbiS/YcfS/YnhG family protein	CBO0012	-0.476522	0.00184667	0.0201672	0.0246496	0.853515	0.904435
CBO0013	CAL81567	7.0.0	Not classified	Not classified (included putative assignments)	dehydrogenase	CBO0013	-0.315735	0.0309636	0.165493	-0.872029	3.7e-06	1.65e-05
CBO0014	CAL81568	0.0.02	Unknown function	Conserved in other than E.coli	hypothetical protein	CBO0014	0.115784	0.570942	0.844428	0.770926	0.00111637	0.00313272
CBO0016	CAL81569	2.2.01	Macromolecule synthesis, modification	Amino acyl tRNA synthesis; tRNA modification	seryl-tRNA synthetase	serS, CBO0016	-0.128632	0.384103	0.723484	0.67162	0.000240085	0.000767775
CBO0017	CAL81570	2.2.07	Macromolecule synthesis, modification	Phospholipids	phosphatidylserine decarboxylase (pseudogene)	psd1, CBO0017	0.147124	0.283766	0.634062	0.435266	0.00977915	0.0224019
CBO0018	CAL81571	5.1.04	Laterally acquired elements	Transposon-related functions	putative transposase (partial)	CBO0018	-0.15493	0.400044	0.738329	-0.286064	0.07217	0.131986
CBO0019	CAL81572	5.1.04	Laterally acquired elements	Transposon-related functions	putative transposase (partial)	CBO0019	-0.1052	0.532411	0.823571	-0.105893	0.473806	0.60049
CBO0020	CAL81573	4.1.07	Cell envelope	G+ exported/lipoprotein	exported protein	CBO0020	-0.110757	0.681571	0.895868	0.488403	0.00366905	0.00920744
CBO0021	CAL81574	1.5.0	Transport/binding proteins	Transport/binding proteins	ABC transporter ATP-binding protein	CBO0021	0.222978	0.28444	0.634062	-1.38317	9.49e-09	7.57e-08
CBO0022	CAL81575	4.1.06	Cell envelope	G+ membrane	hypothetical protein	CBO0022	-0.108572	0.689134	0.899469	-1.75806	1.15e-06	5.68e-06
CBO0023	CAL81576	4.1.06	Cell envelope	G+ membrane	hypothetical protein	CBO0023	0.145434	0.385254	0.724342	-1.07074	6.86e-06	2.89e-05
CBO0024	CAL81577	4.1.06	Cell envelope	G+ membrane	hypothetical protein	CBO0024	0.0586756	0.657336	0.885042	-1.59685	1.29e-07	7.81e-07
CBO0025	CAL81578	2.2.07	Macromolecule synthesis, modification	Phospholipids	phosphatidylserine decarboxylase	psd2, CBO0025	0.0483329	0.825854	0.950723	1.16672	2.62e-08	1.87e-07
CBO0026	CAL81579	4.1.06	Cell envelope	G+ membrane	hypothetical protein	CBO0026	-0.206361	0.0827027	0.321594	1.11227	8.03e-07	4.12e-06
CBO0027	CAL81580	0.0.02	Unknown function	Conserved in other than E.coli	hypothetical protein	CBO0027	-0.397906	0.00434521	0.0386768	1.53963	2.54e-09	2.38e-08
CBO0028	CAL81581	6.0.0	Regulation	Regulation	sensory box sigma-54 dependent transcriptional regulator	CBO0028	-0.0644562	0.600653	0.860176	0.792314	2.07e-05	7.96e-05
CBO0029	CAL81582	3.4.02	Degradation of small molecules	Amino acids	methionine gamma-lyase	mdeA, CBO0029	0.176484	0.32457	0.674025	0.809809	0.000167879	0.000553049
CBO0030	CAL81583	7.0.0	Not classified	Not classified (included putative assignments)	cytidine/deoxycytidylate deaminase	CBO0030	-0.224856	0.0971754	0.353829	-0.226272	0.0952359	0.167755
CBO0031	CAL81584	2.2.03	Macromolecule synthesis, modification	DNA - replication, repair, restriction/modification	DNA polymerase III subunits gamma and tau	dnaX, dnaH, CBO0031	0.874795	1.61365e-06	8.08728e-05	1.34717	6.74e-10	7.65e-09
CBO0032	CAL81585	0.0.02	Unknown function	Conserved in other than E.coli	hypothetical protein	CBO0032	-0.217325	0.166672	0.479158	-0.584505	0.0229787	0.0483249
CBO0033	CAL81586	2.2.03	Macromolecule synthesis, modification	DNA - replication, repair, restriction/modification	recombination protein RecR	recR, recM, CBO0033	0.0787526	0.774464	0.933507	-0.299615	0.0555045	0.105187
CBO0034	CAL81587	0.0.02	Unknown function	Conserved in other than E.coli	hypothetical protein	CBO0034	0.365805	0.0217838	0.129804	0.719373	0.0349022	0.0699599
CBO0035	CAL81588	6.0.0	Regulation	Regulation	sigma-K factor processing regulatory protein BofA	bofA, CBO0035	0.499966	0.048242	0.224014	1.45797	6.62e-06	2.8e-05
CBO0036	CAL81589	6.0.0	Regulation	Regulation	sugar fermentation stimulation protein A	sfsA, CBO0036	0.361143	0.0259614	0.146428	0.495068	0.0082237	0.019119
CBO0037	CAL81590	7.0.0	Not classified	Not classified (included putative assignments)	hydrolase, NUDIX family	CBO0037	-0.580179	0.000354445	0.00578427	0.182429	0.208655	0.320507
CBO0038	CAL81591	0.0.02	Unknown function	Conserved in other than E.coli	hypothetical protein	CBO0038	-2.25276	2.06995e-08	3.04437e-06	-2.60037	2.1e-09	2.02e-08
CBO0039	CAL81592	3.5.03	Energy metabolism, carbon	Electron transport	(Fe-S)-binding protein	CBO0039	0.0876787	0.505946	0.809161	1.05646	1.29e-07	7.8e-07
CBO0040	CAL81593	0.0.02	Unknown function	Conserved in other than E.coli	thiF domain-containing protein	CBO0040	1.14246	1.71894e-06	8.4799e-05	1.9834	2.37e-06	1.1e-05
CBO0041	CAL81594	4.1.06	Cell envelope	G+ membrane	major facilitator superfamily protein	CBO0041	0.78418	0.000616251	0.00884849	1.6438	2.13e-08	1.56e-07
CBO0042	CAL81595	4.2.02	Ribosome constituents	Ribosomal proteins - synthesis, modification	GNAT family acetyltransferase	CBO0042	0.0585907	0.683052	0.896363	0.333761	0.00882451	0.0204043
CBO0042A	CAL81596	2.2.03	Macromolecule synthesis, modification	DNA - replication, repair, restriction/modification	uracil-DNA glycosylase	CBO0042A	-0.211331	0.152562	0.457407	0.478864	0.00320973	0.00817246
CBO0043	CAL81597	6.2.01	Regulation	sigma factor	RNA polymerase factor sigma-70	CBO0043	0.428378	0.0250847	0.143601	0.849007	0.000120571	0.000406825
CBO0043A	CAL81598	0.0.02	Unknown function	Conserved in other than E.coli	hypothetical protein	CBO0043A	0.660298	0.00236861	0.0244105	-0.32513	0.0564559	0.106746
CBO0044	CAL81599	4.1.09	Cell envelope	G+ peptidoglycan, teichoic acid	putative transporter of activated D-alanine (partial)	dltB, CBO0044	0.0516786	0.652338	0.883544	0.192691	0.355549	0.485953
CBO0045	CAL81600	0.0.0	Unknown function	Unknown function, no known homologues	hypothetical protein	CBO0045	0.15263	0.30496	0.654639	-0.0439041	0.760803	0.839381
CBO0046	CAL81601	4.1.09	Cell envelope	G+ peptidoglycan, teichoic acid	putative transporter of activated D-alanine (partial)	dltD, CBO0046	0.154973	0.421921	0.754092	-0.0427832	0.823139	0.883792
CBO0047	CAL81602	1.4.01	Protection responses	Cell killing	peptidil-prolyl isomerase	CBO0047	0.134359	0.549623	0.834725	-0.806833	1.61e-06	7.7e-06
CBO0048	CAL81603	6.5.0	Regulation	Others	NAD-dependent deacetylase	CBO0048	1.32192	1.16976e-07	1.0791e-05	0.755941	0.000157659	0.000521453
CBO0049	CAL81604	7.0.0	Not classified	Not classified (included putative assignments)	LD-carboxypeptidase	CBO0049	0.161167	0.297877	0.648008	0.657317	0.00368724	0.00924717
CBO0050	CAL81605	1.5.0	Transport/binding proteins	Transport/binding proteins	transporter CorA metal ion transporter family	CBO0050	-0.271998	0.0987906	0.357395	0.267486	0.0619345	0.115536
CBO0051	CAL81606	0.0.02	Unknown function	Conserved in other than E.coli	hypothetical protein	CBO0051	-0.396514	0.0320894	0.169741	-1.29554	4.02e-07	2.19e-06
CBO0052	CAL81607	7.0.0	Not classified	Not classified (included putative assignments)	amidohydrolase	CBO0052	-0.0608777	0.665156	0.888222	-0.0851997	0.4925	0.617765
CBO0052A	CAL81608	0.0.02	Unknown function	Conserved in other than E.coli	hypothetical protein	CBO0052A	0.642583	0.00126513	0.0151287	2.78083	1.31e-12	4.13e-11
CBO0053	CAL81609	3.4.02	Degradation of small molecules	Amino acids	Orn/Lys/Arg decarboxylase	CBO0053	-0.561666	0.000697437	0.00973875	0.153174	0.228019	0.343656
CBO0054	CAL81610	3.3.11	Central intermediary metabolism	Nucleotide interconversions	thymidylate kinase	CBO0054	-0.468086	0.0510805	0.232731	-0.820126	0.00171974	0.00463973
CBO0055	CAL81611	0.0.02	Unknown function	Conserved in other than E.coli	hypothetical protein	CBO0055	-0.0741105	0.809986	0.946429	-0.408583	0.346873	0.47712
CBO0056	CAL81612	2.2.03	Macromolecule synthesis, modification	DNA - replication, repair, restriction/modification	DNA polymerase III subunit delta'	CBO0056	-0.0725877	0.601235	0.860326	1.02657	0.000443692	0.00134717
CBO0057	CAL81613	2.2.10	Macromolecule synthesis, modification	Proteins - translation and modification	PSP1 domain-containing protein	CBO0057	0.194606	0.594739	0.857447	-1.2286	0.00291858	0.00751265
CBO0058	CAL81614	7.0.0	Not classified	Not classified (included putative assignments)	hypothetical protein	CBO0058	0.467997	0.00840097	0.0640533	2.17528	7.56e-10	8.4e-09
CBO0059	CAL81615	3.5.03	Energy metabolism, carbon	Electron transport	ferredoxin, 4Fe-4S	CBO0059	0.237524	0.163669	0.475082	0.0822116	0.637525	0.744285
CBO0060	CAL81616	0.0.02	Unknown function	Conserved in other than E.coli	hypothetical protein	CBO0060	0.111633	0.631788	0.874211	-2.46216	1.77e-09	1.75e-08
CBO0061	CAL81617	7.0.0	Not classified	Not classified (included putative assignments)	tetrapyrrole methylase	CBO0061	0.0720189	0.639232	0.877188	-1.01377	2.15e-06	1e-05
CBO0062	CAL81618	4.1.09	Cell envelope	G+ peptidoglycan, teichoic acid	NlpC/P60 family protein	CBO0062	-0.473745	0.0190816	0.117117	-1.26251	2.85e-07	1.6e-06
CBO0063	CAL81619	6.0.0	Regulation	Regulation	AbrB family transcriptional regulator	abrB, cpsX, CBO0063	1.08461	3.78115e-05	0.000980297	1.48952	4e-06	1.77e-05
CBO0064	CAL81620	0.0.02	Unknown function	Conserved in other than E.coli	hypothetical protein	CBO0064	1.30337	3.33744e-06	0.000141567	2.80363	5.37e-11	8.79e-10
CBO0065	CAL81621	3.4.02	Degradation of small molecules	Amino acids	arginine deiminase	arcA1, CBO0065	-0.226947	0.335602	0.682991	-2.68678	4.34e-10	5.21e-09
CBO0066	CAL81622	3.2.0	Biosynthesis of cofactors, carriers	Biosynthesis of cofactors, carriers	2-C-methyl-D-erythritol 2,4-cyclodiphosphate synthase	ispF, CBO0066	-0.24908	0.149426	0.45242	-0.3939	0.0294027	0.0601312
CBO0067	CAL81623	4.1.06	Cell envelope	G+ membrane	hypothetical protein	CBO0067	0.182457	0.15699	0.46497	0.816205	2.7e-06	1.24e-05
CBO0068	CAL81624	2.1.03	Macromolecule degradation	Degradation of polysaccharides	polysaccharide deacetylase	CBO0068	0.632576	0.00241674	0.0247444	1.06935	1.1e-05	4.47e-05
CBO0069	CAL81625	0.0.02	Unknown function	Conserved in other than E.coli	hypothetical protein	CBO0069	0.138151	0.48412	0.798838	-0.175171	0.113896	0.194634
CBO0070	CAL81626	1.8.01	Differentiation/sporulation/Germination	Differentiation/sporulation/Germination	spore maturation protein A	spmA, CBO0070	0.160092	0.26679	0.61435	0.498728	0.00178104	0.00478868
CBO0071	CAL81627	1.8.01	Differentiation/sporulation/Germination	Differentiation/sporulation/Germination	spore maturation protein B	spmB, CBO0071	0.130721	0.561523	0.840949	0.791039	4.38e-05	0.000159563
CBO0072	CAL81628	1.4.03	Protection responses	Drug/analogue sensitivity	MATE efflux family protein	CBO0072	0.048981	0.749188	0.9237	0.333846	0.0395725	0.0781273
CBO0073	CAL81629	2.2.03	Macromolecule synthesis, modification	DNA - replication, repair, restriction/modification	uracil-DNA glycosylase	CBO0073	-0.60589	0.000216822	0.00394466	0.41136	0.00597111	0.0143112
CBO0074	CAL81630	6.3.07	Regulation	MarR	MarR family transcriptional regulator	CBO0074	-0.146091	0.348056	0.694304	-0.456572	0.00871416	0.0201698
CBO0075	CAL81631	2.2.01	Macromolecule synthesis, modification	Amino acyl tRNA synthesis; tRNA modification	methionyl-tRNA synthetase	metG, metS, CBO0075	-0.495842	0.0076616	0.059718	-1.6461	3e-09	2.74e-08
CBO0076	CAL81632	4.1.06	Cell envelope	G+ membrane	hypothetical protein	CBO0076	-0.959526	6.82689e-05	0.00155477	-1.33129	1.31e-06	6.38e-06
CBO0077	CAL81633	7.0.0	Not classified	Not classified (included putative assignments)	TatD family hydrolase	CBO0077	-0.777143	6.46248e-05	0.00148652	-2.17467	1.05e-06	5.25e-06
CBO0078	CAL81634	1.4.01	Protection responses	Cell killing	putative enterocin immunity protein (partial)	CBO0078	-0.848579	0.000127762	0.00257769	-0.355814	0.0588026	0.110493
CBO0079	CAL81635	4.1.07	Cell envelope	G+ exported/lipoprotein	3D/G5 domain protein	CBO0079	0.0748074	0.712595	0.908761	-0.640916	0.0122428	0.0274923
CBO0080	CAL81636	0.0.02	Unknown function	Conserved in other than E.coli	primase-like protein	CBO0080	0.114193	0.544367	0.8318	-1.50234	1.41e-07	8.43e-07
CBO0081	CAL81637	2.2.11	Macromolecule synthesis, modification	RNA synthesis, modification, DNA transcription	dimethyladenosine transferase	ksgA, rsmA, CBO0081	-0.187417	0.243047	0.58672	-0.820985	3.64e-05	0.00013423
CBO0082	CAL81638	0.0.02	Unknown function	Conserved in other than E.coli	hypothetical protein	CBO0082	0.10867	0.421398	0.753926	-1.01475	3.24e-07	1.79e-06
CBO0083	CAL81639	4.1.0	Cell envelope	Periplasmic/exported/lipoproteins	hypothetical protein	CBO0083	0.087414	0.558289	0.838099	0.165186	0.167704	0.268317
CBO0084	CAL81640	4.1.0	Cell envelope	Periplasmic/exported/lipoproteins	lipoprotein	CBO0084	-0.75364	0.00475088	0.0412153	0.661074	1.33e-05	5.28e-05
CBO0085	CAL81641	4.1.0	Cell envelope	Periplasmic/exported/lipoproteins	macrolide ABC transporter	CBO0085	0.465905	0.0187045	0.115161	1.80726	2.81e-09	2.6e-08
CBO0086	CAL81642	1.5.0	Transport/binding proteins	Transport/binding proteins	macrolide ABC transporter ATP-binding protein	CBO0086	0.358234	0.0795079	0.313352	1.08725	2.06e-05	7.93e-05
CBO0087	CAL81643	1.5.0	Transport/binding proteins	Transport/binding proteins	macrolide ABC transporter permease	CBO0087	0.174406	0.450426	0.776125	0.502034	0.00189535	0.00506403
CBO0088	CAL81644	7.0.0	Not classified	Not classified (included putative assignments)	ATP/GTP-binding-like protein	CBO0088	0.0568548	0.699262	0.903282	-0.399409	0.00506354	0.0123218
CBO0089	CAL81645	3.5.03	Energy metabolism, carbon	Electron transport	(Fe-S)-binding protein	CBO0089	0.210131	0.0910246	0.339203	1.34457	7.16e-08	4.57e-07
CBO0090	CAL81646	4.1.06	Cell envelope	G+ membrane	hypothetical protein	CBO0090	0.102148	0.524052	0.819456	0.371203	0.0222397	0.0469214
CBO0091	CAL81647	0.0.0	Unknown function	Unknown function, no known homologues	hypothetical protein	CBO0091	-0.0872792	0.587934	0.853626	0.0810231	0.552848	0.672294
CBO0092	CAL81648	7.0.0	Not classified	Not classified (included putative assignments)	diguanylate cyclase	CBO0092	0.0923312	0.510342	0.811163	0.842122	1.68e-05	6.56e-05
CBO0093	CAL81649	1.5.02	Transport/binding proteins	Cations	Mg2+ transporter	CBO0093	0.743595	0.000184258	0.00343156	1.65128	3.08e-09	2.81e-08
CBO0094	CAL81650	3.3.01	Central intermediary metabolism	2'-Deoxyribonucleotide metabolism	anaerobic ribonucleoside triphosphate reductase	nrdD, CBO0094	-0.231798	0.323234	0.673027	-0.413982	0.00466282	0.0114297
CBO0095	CAL81651	3.3.11	Central intermediary metabolism	Nucleotide interconversions	anaerobic ribonucleoside-triphosphate reductase activating protein	nrdG, CBO0095	0.0939553	0.715636	0.910784	-1.99948	1.14e-06	5.61e-06
CBO0096	CAL81652	4.1.06	Cell envelope	G+ membrane	hypothetical protein	CBO0096	0.643971	0.00127525	0.015192	3.0546	2.62e-13	1.17e-11
CBO0097	CAL81653	6.3.14	Regulation	PadR	PadR family transcriptional regulator	CBO0097	0.883395	0.0017251	0.0191723	3.32152	2.91e-11	5.32e-10
CBO0098	CAL81654	0.0.02	Unknown function	Conserved in other than E.coli	zinc-dependent hydrolase	CBO0098	0.122171	0.472236	0.791824	-0.235209	0.242182	0.360877
CBO0099	CAL81655	2.2.01	Macromolecule synthesis, modification	Amino acyl tRNA synthesis; tRNA modification	isoleucyl-tRNA synthetase	ileS, CBO0099	0.100615	0.5409	0.829612	-1.06229	2.81e-06	1.28e-05
CBO0100	CAL81656	6.3.05	Regulation	LacI	LacI family transcriptional regulator	ccpA, regA, repA, CBO0100	-0.466131	0.0037374	0.034577	-1.66819	3.58e-10	4.4e-09
CBO0101	CAL81657	0.0.02	Unknown function	Conserved in other than E.coli	hypothetical protein	CBO0101	0.12723	0.217544	0.553694	-0.328183	0.00387399	0.00968312
CBO0102	CAL81658	2.2.05	Macromolecule synthesis, modification	Lipopolysaccharide	mannose-1-phosphate guanylyltransferase	CBO0102	0.169519	0.468621	0.788906	-0.393827	0.102104	0.177784
CBO0103	CAL81659	0.0.02	Unknown function	Conserved in other than E.coli	hypothetical protein	CBO0103	0.174902	0.386584	0.725888	-0.742089	0.00133711	0.00368577
CBO0104	CAL81660	0.0.02	Unknown function	Conserved in other than E.coli	hypothetical protein	CBO0104	0.15151	0.319362	0.668556	0.404889	0.00986025	0.0225604
CBO0105	CAL81661	0.0.02	Unknown function	Conserved in other than E.coli	hypothetical protein	CBO0105	-0.122824	0.431664	0.762156	-0.763704	8.18e-05	0.000283598
CBO0106	CAL81662	7.0.0	Not classified	Not classified (included putative assignments)	radical SAM domain protein	CBO0106	-1.25887	3.55331e-07	2.54175e-05	-0.489593	0.00798493	0.0186119
CBO0107	CAL81663	1.5.0	Transport/binding proteins	Transport/binding proteins	sugar-binding protein	CBO0107	0.397583	0.0182553	0.113237	0.419191	0.013512	0.0300506
CBO0108	CAL81664	2.2.08	Macromolecule synthesis, modification	Polysaccharides - (cytoplasmic)	glycosyl transferase family protein	CBO0108	-0.114026	0.370567	0.71388	-0.21296	0.226194	0.341487
CBO0109	CAL81665	1.8.01	Differentiation/sporulation/Germination	Differentiation/sporulation/Germination	spore coat protein	CBO0109	-0.182346	0.134048	0.426251	0.169161	0.162806	0.261525
CBO0110	CAL81666	0.0.0	Unknown function	Unknown function, no known homologues	hypothetical protein	CBO0110	0.111418	0.46439	0.785613	0.133108	0.383535	0.51407
CBO0111	CAL81667	1.8.01	Differentiation/sporulation/Germination	Differentiation/sporulation/Germination	hypothetical protein	CBO0111	0.0422086	0.772385	0.932491	-0.257957	0.0889602	0.158296
CBO0112	CAL81668	1.8.01	Differentiation/sporulation/Germination	Differentiation/sporulation/Germination	spore coat protein	CBO0112	-0.176715	0.228187	0.567668	0.104265	0.440364	0.568453
CBO0113	CAL81669	2.2.08	Macromolecule synthesis, modification	Polysaccharides - (cytoplasmic)	glycosyl transferase family protein	CBO0113	-0.115942	0.48957	0.800966	0.068485	0.694522	0.790763
CBO0114	CAL81670	1.8.01	Differentiation/sporulation/Germination	Differentiation/sporulation/Germination	spore coat protein CotS	CBO0114	-0.0602127	0.553281	0.8361	0.427456	0.179603	0.283782
CBO0115	CAL81671	2.1.04	Macromolecule degradation	Degradation of proteins, peptides, glycoproteins	peptidase	CBO0115	-0.0319664	0.809684	0.946164	0.139624	0.402155	0.531945
CBO0116	CAL81672	0.0.02	Unknown function	Conserved in other than E.coli	hypothetical protein	CBO0116	1.69004	1.04109e-06	5.70857e-05	3.6814	5.24e-12	1.26e-10
CBO0117	CAL81673	7.0.0	Not classified	Not classified (included putative assignments)	LysM domain-containing protein	CBO0117	2.24113	8.14457e-11	5.10104e-08	3.70196	1.34e-13	6.84e-12
CBO0119	CAL81674	2.1.04	Macromolecule degradation	Degradation of proteins, peptides, glycoproteins	cyanophycinase	cphB, CBO0119	0.502672	0.00505662	0.0430606	0.510165	0.00454945	0.0111849
CBO0120	CAL81675	2.2.02	Macromolecule synthesis, modification	Basic proteins - synthesis, modification	cyanophycin synthetase	cphA, CBO0120	0.0840419	0.605375	0.862458	0.324617	0.0567363	0.107225
CBO0121	CAL81676	3.2.08	Biosynthesis of cofactors, carriers	Menaquinone, ubiquinone	4-diphosphocytidyl-2-C-methyl-D-erythritol kinase	ispE, ipk, CBO0121	-0.361257	0.0154896	0.100602	-0.561527	0.000707261	0.00206382
CBO0122	CAL81677	4.1.06	Cell envelope	G+ membrane	hypothetical protein	CBO0122	-0.0841803	0.465221	0.786596	-0.092294	0.423994	0.552854
CBO0123	CAL81678	1.8.01	Differentiation/sporulation/Germination	Differentiation/sporulation/Germination	spore germination protein	CBO0123	-0.109815	0.459974	0.782806	0.0413004	0.760335	0.839146
CBO0124	CAL81679	1.8.01	Differentiation/sporulation/Germination	Differentiation/sporulation/Germination	spore germination protein	CBO0124	-0.138079	0.342346	0.688321	-0.291519	0.076602	0.138977
CBO0125	CAL81680	1.8.01	Differentiation/sporulation/Germination	Differentiation/sporulation/Germination	germination protein, Ger(x)C family	CBO0125	-0.361493	0.0296061	0.160438	-0.485737	0.00154282	0.00419912
CBO0126	CAL81681	1.8.01	Differentiation/sporulation/Germination	Differentiation/sporulation/Germination	stage II sporulation protein R	CBO0126	-0.112496	0.342972	0.688786	-0.323225	0.0223295	0.0470982
CBO0127	CAL81682	4.1.09	Cell envelope	G+ peptidoglycan, teichoic acid	hypothetical protein	CBO0127	-0.534682	0.0101405	0.0734645	0.397452	0.10055	0.175506
CBO0128	CAL81683	1.8.01	Differentiation/sporulation/Germination	Differentiation/sporulation/Germination	germination protein YpeB	CBO0128	0.100558	0.509513	0.810693	0.298606	0.167341	0.267899
CBO0129	CAL81684	0.0.02	Unknown function	Conserved in other than E.coli	hypothetical protein	CBO0129	-0.718709	0.005051	0.0430606	-1.13871	0.000532677	0.00159247
CBO0130	CAL81685	0.0.02	Unknown function	Conserved in other than E.coli	hypothetical protein	CBO0130	0.0711186	0.699658	0.903613	-0.763873	0.000483899	0.00145967
CBO0131	CAL81686	0.0.02	Unknown function	Conserved in other than E.coli	hypothetical protein	CBO0131	0.201356	0.193289	0.519595	-0.677228	0.000297841	0.000935181
CBO0132	CAL81687	3.7.02	Nucleotide biosynthesis	Pyrimidine ribonucleotide biosynthesis	CTP synthetase	pyrG, CBO0132	-0.129967	0.428327	0.759404	-1.31728	1.21e-07	7.38e-07
CBO0133	CAL81688	0.0.02	Unknown function	Conserved in other than E.coli	hypothetical protein	CBO0133	-1.06461	6.46001e-06	0.000228967	-0.992016	1.86e-06	8.81e-06
CBO0134	CAL81689	2.2.11	Macromolecule synthesis, modification	RNA synthesis, modification, DNA transcription	transcription termination factor Rho	rho, CBO0134	-0.418293	0.0277187	0.152698	-0.879069	3.44e-06	1.54e-05
CBO0135	CAL81690	4.2.02	Ribosome constituents	Ribosomal proteins - synthesis, modification	50S ribosomal protein L31	rpmE, CBO0135	0.0741252	0.584645	0.851903	-0.0530581	0.695035	0.790943
CBO0136	CAL81691	3.3.11	Central intermediary metabolism	Nucleotide interconversions	thymidine kinase	tdK, CBO0136	-0.571191	0.164258	0.475434	-2.5031	4.53e-06	1.98e-05
CBO0137	CAL81692	4.1.06	Cell envelope	G+ membrane	hypothetical protein	CBO0137	-0.0942812	0.463724	0.785597	-0.365395	0.0267548	0.0554146
CBO0138	CAL81693	2.2.10	Macromolecule synthesis, modification	Proteins - translation and modification	protein methyltransferase	CBO0138	-0.263043	0.0385792	0.191973	-1.45661	1.84e-10	2.47e-09
CBO0139	CAL81694	2.2.10	Macromolecule synthesis, modification	Proteins - translation and modification	peptide chain release factor 1	prfA, CBO0139	-0.131449	0.454536	0.778923	-1.12386	5.5e-08	3.6e-07
CBO0140	CAL81695	4.1.06	Cell envelope	G+ membrane	hypothetical protein	CBO0140	0.322047	0.181728	0.503645	-1.23714	6.21e-05	0.000220094
CBO0141	CAL81696	1.5.02	Transport/binding proteins	Cations	ZIP transporter family protein	CBO0141	0.419214	0.028996	0.158281	-0.584448	0.0038352	0.00959228
CBO0142	CAL81697	0.0.02	Unknown function	Conserved in other than E.coli	Sua5/YciO/YrdC/YwlC family protein	CBO0142	-0.0836536	0.630143	0.873014	-1.86798	1.34e-09	1.37e-08
CBO0143	CAL81698	2.2.02	Macromolecule synthesis, modification	Basic proteins - synthesis, modification	low molecular weight protein tyrosine phosphatase	CBO0143	-0.0575372	0.748298	0.923387	-1.33759	1.18e-07	7.18e-07
CBO0144	CAL81699	3.3.09	Central intermediary metabolism	Non-oxidative branch, pentose pathway	ribose-5-phosphate isomerase B	rpiB, CBO0144	-0.786043	0.000107122	0.00221521	-3.4752	9.54e-15	8.68e-13
CBO0145	CAL81700	3.3.11	Central intermediary metabolism	Nucleotide interconversions	uracil phosphoribosyltransferase	upp, CBO0145	-0.179468	0.333474	0.681966	-3.32911	7.51e-10	8.35e-09
CBO0146	CAL81701	7.0.0	Not classified	Not classified (included putative assignments)	cytidine/deoxycytidylate deaminase	CBO0146	-0.603758	0.000325659	0.00540601	-0.765513	7.24e-06	3.03e-05
CBO0147	CAL81702	4.1.09	Cell envelope	G+ peptidoglycan, teichoic acid	UDP-GlcNAc:UDP-P GlcNAc 1-P transferase	tagO, CBO0147	-0.331719	0.133041	0.424247	-0.390146	0.0779235	0.141147
CBO0148	CAL81703	4.1.09	Cell envelope	G+ peptidoglycan, teichoic acid	UDP-N-acetylglucosamine 2-epimerase	mnaA, CBO0148	0.0525798	0.722867	0.91446	-1.5481	2.59e-09	2.42e-08
CBO0149	CAL81704	3.5.09	Energy metabolism, carbon	ATP-proton motive force	ATP synthase I	CBO0149	0.224192	0.12654	0.412908	0.661999	0.000955214	0.00271781
CBO0150	CAL81705	3.5.09	Energy metabolism, carbon	ATP-proton motive force	ATP synthase F0F1 subunit A	atpA, atpB, CBO0150	0.528584	0.00628629	0.0513641	0.623705	0.0460997	0.0895755
CBO0151	CAL81706	3.5.09	Energy metabolism, carbon	ATP-proton motive force	F0F1 ATP synthase subunit C	atpC, atpE, CBO0151	0.229734	0.186171	0.510146	-0.698239	0.000605188	0.00179121
CBO0152	CAL81707	3.5.09	Energy metabolism, carbon	ATP-proton motive force	ATP synthase F0F1 subunit B	atpB, atpF, CBO0152	0.348691	0.0305739	0.163821	0.781344	5.32e-05	0.000190721
CBO0153	CAL81708	3.5.09	Energy metabolism, carbon	ATP-proton motive force	ATP synthase F0F1 subunit delta	atpH, CBO0153	0.176979	0.239717	0.582511	-1.03909	9.29e-07	4.7e-06
CBO0154	CAL81709	3.5.09	Energy metabolism, carbon	ATP-proton motive force	ATP synthase F0F1 subunit alpha	atpA, CBO0154	0.203949	0.315729	0.665056	-1.43342	7.4e-07	3.82e-06
CBO0155	CAL81710	3.5.09	Energy metabolism, carbon	ATP-proton motive force	ATP synthase F0F1 subunit gamma	atpG, CBO0155	0.340693	0.0662563	0.277242	0.552959	0.00514169	0.0124984
CBO0156	CAL81711	3.5.09	Energy metabolism, carbon	ATP-proton motive force	ATP synthase F0F1 subunit beta	atpD, CBO0156	0.226861	0.4585	0.781946	-0.689568	0.0131729	0.0293586
CBO0157	CAL81712	3.5.09	Energy metabolism, carbon	ATP-proton motive force	ATP synthase F0F1 subunit epsilon	atpC, CBO0157	0.176338	0.333756	0.681966	-1.49518	8.35e-08	5.26e-07
CBO0158	CAL81713	4.1.07	Cell envelope	G+ exported/lipoprotein	hypothetical protein	CBO0158	0.0901086	0.460989	0.783263	0.229957	0.158559	0.25629
CBO0159	CAL81714	4.1.09	Cell envelope	G+ peptidoglycan, teichoic acid	UDP-N-acetylglucosamine 1-carboxyvinyltransferase	murA, muraA, CBO0159	0.284316	0.282656	0.632919	-0.619162	0.00169811	0.0045861
CBO0160	CAL81715	1.8.01	Differentiation/sporulation/Germination	Differentiation/sporulation/Germination	stage II sporulation protein D	spoIID, spoIIC, CBO0160	-0.0724799	0.632388	0.874361	0.374346	0.0261603	0.0543478
CBO0161	CAL81716	2.1.04	Macromolecule degradation	Degradation of proteins, peptides, glycoproteins	peptidase	CBO0161	-0.0698073	0.639317	0.877215	0.310763	0.0362703	0.0723826
CBO0162	CAL81717	1.8.01	Differentiation/sporulation/Germination	Differentiation/sporulation/Germination	stage III sporulation protein D	spoIIID, CBO0162	0.114336	0.388106	0.726925	-0.188082	0.162576	0.26128
CBO0163	CAL81718	1.7.01	Cell division	Cell division	rod shape-determining protein Mbl	mreB, CBO0163	-0.591196	0.00120524	0.0146349	-1.10193	9.91e-07	4.98e-06
CBO0164	CAL81719	0.0.02	Unknown function	Conserved in other than E.coli	hypothetical protein	CBO0164	-0.421008	0.00918104	0.0685228	-0.759786	4.8e-05	0.000173169
CBO0165	CAL81720	0.0.02	Unknown function	Conserved in other than E.coli	hypothetical protein	CBO0165	-1.57629	1.5036e-09	4.55041e-07	-1.89852	6.68e-11	1.06e-09
CBO0168	CAL81721	3.3.16	Central intermediary metabolism	S-adenosyl methionine	S-adenosylmethionine synthetase	metK, metE, CBO0168	-0.101626	0.565906	0.842702	0.534163	0.00632039	0.015068
CBO0169	CAL81722	7.0.0	Not classified	Not classified (included putative assignments)	helicase, RecD/TraA family	CBO0169	-0.321281	0.0911536	0.339603	0.957953	1.99e-06	9.38e-06
CBO0170	CAL81723	0.0.02	Unknown function	Conserved in other than E.coli	hypothetical protein	CBO0170	-0.0353408	0.804384	0.944674	0.421707	0.00713949	0.0168472
CBO0171	CAL81724	7.0.0	Not classified	Not classified (included putative assignments)	phosphoribosyl transferase	CBO0171	0.138126	0.46788	0.788332	1.76885	6.79e-09	5.64e-08
CBO0172	CAL81725	7.0.0	Not classified	Not classified (included putative assignments)	ribosomal subunit interface protein	CBO0172	0.882755	0.00237838	0.0244791	3.23978	8.68e-11	1.32e-09
CBO0173	CAL81726	1.5.05	Transport/binding proteins	Other	preprotein translocase subunit SecA	secA, azi, div, CBO0173	0.177084	0.67272	0.890577	-1.07545	8.89e-07	4.51e-06
CBO0175	CAL81727	2.2.10	Macromolecule synthesis, modification	Proteins - translation and modification	peptide chain release factor 2	prfB, CBO0175	-0.116341	0.604172	0.861697	-0.592305	0.00383225	0.00958641
CBO0176	CAL81728	2.1.04	Macromolecule degradation	Degradation of proteins, peptides, glycoproteins	peptidase	CBO0176	-0.0556062	0.756037	0.926309	0.199302	0.272686	0.395471
CBO0177	CAL81729	7.0.0	Not classified	Not classified (included putative assignments)	RNA-binding protein	CBO0177	-0.312406	0.0240892	0.139526	-1.44452	7.27e-10	8.13e-09
CBO0178	CAL81730	1.5.05	Transport/binding proteins	Other	hypothetical protein	CBO0178	-0.293916	0.108988	0.380465	-0.558155	0.00480218	0.0117384
CBO0179	CAL81731	0.0.02	Unknown function	Conserved in other than E.coli	hypothetical protein	CBO0179	-0.453903	0.00749199	0.0586866	1.32703	1.91e-06	9.05e-06
CBO0180	CAL81732	1.5.05	Transport/binding proteins	Other	hypothetical protein	CBO0180	-0.799284	5.00418e-05	0.00121155	0.287514	0.150384	0.245217
CBO0181	CAL81733	7.0.0	Not classified	Not classified (included putative assignments)	Ser/Thr protein phosphatase	CBO0181	-0.652902	0.000631921	0.00901434	0.472366	0.00810329	0.0188586
CBO0182	CAL81734	6.3.13	Regulation	ArsR	transcription regulator ArsR	CBO0182	0.101928	0.401645	0.73887	2.9757	7.91e-15	7.54e-13
CBO0183	CAL81735	7.0.0	Not classified	Not classified (included putative assignments)	pyridine nucleotide-disulfide oxidoreductase	CBO0183	0.108781	0.500621	0.806664	2.88177	1.37e-13	6.93e-12
CBO0184	CAL81736	0.0.02	Unknown function	Conserved in other than E.coli	hypothetical protein	CBO0184	0.0253434	0.897372	0.974062	2.15564	1.01e-09	1.07e-08
CBO0185	CAL81737	7.0.0	Not classified	Not classified (included putative assignments)	RelA/SpoT domain-containing protein	CBO0185	-0.550238	0.00233928	0.0241715	-0.502366	0.0278888	0.057476
CBO0186	CAL81738	2.2.01	Macromolecule synthesis, modification	Amino acyl tRNA synthesis; tRNA modification	leucyl-tRNA synthetase	leuS, CBO0186	0.822098	0.000846216	0.0111719	1.40494	2.8e-08	1.97e-07
CBO0187	CAL81739	4.1.07	Cell envelope	G+ exported/lipoprotein	hypothetical protein	CBO0187	-0.097889	0.509043	0.810482	0.289218	0.16289	0.261626
CBO0188	CAL81740	4.1.06	Cell envelope	G+ membrane	hypothetical protein	CBO0188	-0.129242	0.321232	0.670496	-0.96855	3.5e-07	1.92e-06
CBO0189	CAL81741	7.0.0	Not classified	Not classified (included putative assignments)	DnaJ family molecular chaperone	CBO0189	-0.228388	0.0982483	0.356292	-1.46005	8.72e-06	3.59e-05
CBO0190	CAL81742	0.0.02	Unknown function	Conserved in other than E.coli	hypothetical protein	CBO0190	-0.760724	8.27404e-05	0.00180845	-1.09997	3.63e-07	1.99e-06
CBO0191	CAL81743	7.0.0	Not classified	Not classified (included putative assignments)	adenylyl cyclase	CBO0191	-0.445269	0.0219472	0.130481	-0.594905	0.00349604	0.00882392
CBO0192	CAL81744	0.0.02	Unknown function	Conserved in other than E.coli	hypothetical protein	CBO0192	-0.551149	0.00124309	0.0149447	-1.68318	8.18e-11	1.26e-09
CBO0193	CAL81745	3.4.03	Degradation of small molecules	Carbon compounds	fructose-1,6-bisphosphate aldolase	CBO0193	-0.155553	0.37289	0.715717	0.0595061	0.678478	0.776976
CBO0194	CAL81746	0.0.02	Unknown function	Conserved in other than E.coli	hypothetical protein	CBO0194	-0.144592	0.319307	0.668556	-0.189637	0.153137	0.24901
CBO0195	CAL81747	4.1.06	Cell envelope	G+ membrane	hypothetical protein	CBO0195	0.102832	0.383386	0.723083	0.154303	0.196427	0.305301
CBO0196	CAL81748	7.0.0	Not classified	Not classified (included putative assignments)	threonyl-tRNA synthetase/uridine kinase	CBO0196	-0.0638138	0.674005	0.890853	1.71077	0.00237283	0.00622043
CBO0197	CAL81749	0.0.0	Unknown function	Unknown function, no known homologues	hypothetical protein	CBO0197	0.138704	0.287435	0.635447	0.463128	0.00169981	0.00458991
CBO0198	CAL81750	2.2.07	Macromolecule synthesis, modification	Phospholipids	CDP-diacylglycerol--serine O-phosphatidyltransferase	CBO0198	0.35043	0.226244	0.565142	2.72194	4.13e-09	3.64e-08
CBO0199	CAL81751	0.0.02	Unknown function	Conserved in other than E.coli	hypothetical protein	CBO0199	0.0411669	0.814038	0.947821	0.0540936	0.765426	0.842692
CBO0200	CAL81752	0.0.02	Unknown function	Conserved in other than E.coli	lipid kinase	CBO0200	-0.223494	0.120481	0.401392	1.92045	2.27e-08	1.65e-07
CBO0201	CAL81753	4.1.06	Cell envelope	G+ membrane	hypothetical protein	CBO0201	-0.22528	0.339192	0.685175	-0.422663	0.0356847	0.0713897
CBO0202	CAL81754	7.0.0	Not classified	Not classified (included putative assignments)	hypothetical protein	CBO0202	0.0690096	0.722896	0.91446	-0.136848	0.31056	0.437928
CBO0203	CAL81755	7.0.0	Not classified	Not classified (included putative assignments)	PRC-barrel domain/MgtE domain/CBS domain-containing protein	CBO0203	-0.693579	0.0295932	0.160423	-0.703534	0.0126453	0.0282991
CBO0204	CAL81756	1.8.01	Differentiation/sporulation/Germination	Differentiation/sporulation/Germination	spore-cortex-lytic enzyme	sleB, CBO0204	-0.154013	0.410514	0.745371	-0.153317	0.209234	0.321241
CBO0205	CAL81757	3.1.06	Amino acid biosynthesis	Cysteine	cysteine synthase A	cysK1, CBO205	0.693386	0.000473969	0.00725275	0.8973	2.97e-05	0.000111233
CBO0206	CAL81758	3.1.06	Amino acid biosynthesis	Cysteine	serine O-acetyltransferase	cysE, cysA, CBO0206	0.892459	3.78891e-06	0.000156089	1.204	3.12e-08	2.17e-07
CBO0207	CAL81759	7.0.0	Not classified	Not classified (included putative assignments)	(Fe-S)-binding protein	CBO0207	0.819409	0.000776952	0.0105495	1.66078	1.45e-07	8.67e-07
CBO0208	CAL81760	7.0.0	Not classified	Not classified (included putative assignments)	1-acyl-sn-glycerol-3-phosphate acyltransferase	plsD, CBO0208	-0.0481351	0.712472	0.908722	-0.135647	0.29345	0.419172
CBO0209	CAL81761	2.2.03	Macromolecule synthesis, modification	DNA - replication, repair, restriction/modification	endonuclease III	nth, CBO0209	-0.42813	0.176791	0.495928	-0.875831	0.00983909	0.0225284
CBO0210	CAL81762	3.4.03	Degradation of small molecules	Carbon compounds	malic enzyme	CBO0210	-0.242905	0.185153	0.508508	-0.122852	0.495178	0.620129
CBO0211	CAL81763	7.0.0	Not classified	Not classified (included putative assignments)	competence damage-inducible protein A	CBO0211	-0.221466	0.0816406	0.318804	-1.46875	2.97e-10	3.73e-09
CBO0212	CAL81764	4.1.07	Cell envelope	G+ exported/lipoprotein	hypothetical protein	CBO0212	-0.382984	0.127632	0.414495	-1.61983	2.14e-05	8.22e-05
CBO0213	CAL81765	2.1.04	Macromolecule degradation	Degradation of proteins, peptides, glycoproteins	glutamyl aminopeptidase	CBO0213	-0.51975	0.00936223	0.069366	1.15091	3e-05	0.000112285
CBO0214	CAL81766	4.1.07	Cell envelope	G+ exported/lipoprotein	vanW-like family protein	CBO0214	-0.146328	0.319104	0.668414	-0.460018	0.0131663	0.0293481
CBO0215	CAL81767	4.1.07	Cell envelope	G+ exported/lipoprotein	exported protein	CBO0215	0.0915382	0.516049	0.815203	0.265454	0.0462871	0.0898677
CBO0216	CAL81768	1.4.04	Protection responses	Radiation sensitivity	spore photoproduct lyase	splB, spl, CBO0216	0.126823	0.355189	0.70089	-0.470395	0.020947	0.0444923
CBO0217	CAL81769	2.2.11	Macromolecule synthesis, modification	RNA synthesis, modification, DNA transcription	hypothetical protein	CBO0217	-0.484752	0.00504486	0.0430606	-0.707804	6.55e-05	0.000231243
CBO0218	CAL81770	0.0.02	Unknown function	Conserved in other than E.coli	DegV family protein	CBO0218	-0.438483	0.0485704	0.225273	-0.520304	0.00135649	0.00373331
CBO0219	CAL81771	4.1.07	Cell envelope	G+ exported/lipoprotein	lipoprotein, bmp family	CBO0219	-0.238589	0.0505046	0.231086	-0.514675	0.0864889	0.154352
CBO0220	CAL81772	1.5.0	Transport/binding proteins	Transport/binding proteins	sugar ABC transporter ATP-binding protein	CBO0220	-0.340436	0.0443389	0.211069	-0.451688	0.00265081	0.00687926
CBO0221	CAL81773	1.5.0	Transport/binding proteins	Transport/binding proteins	sugar ABC transporter permease	CBO0221	0.144141	0.299822	0.649904	-0.488684	0.000538571	0.00160861
CBO0222	CAL81774	1.5.0	Transport/binding proteins	Transport/binding proteins	sugar ABC transporter permease	CBO0222	-0.0145586	0.945126	0.987092	0.517264	0.000758193	0.00219817
CBO0223	CAL81775	2.1.03	Macromolecule degradation	Degradation of polysaccharides	polysaccharide deacetylase	CBO0223	0.0884281	0.517736	0.816393	0.657699	0.00232327	0.00610371
CBO0224	CAL81776	6.2.01	Regulation	sigma factor	RNA polymerase factor sigma-54	rpoN, ntrA, hno, CBO0224	0.0946876	0.481535	0.79791	1.14727	0.00012511	0.000421417
CBO0225	CAL81777	6.5.0	Regulation	Others	central glycolytic genes regulator	cggR, CBO0225	0.0833819	0.635072	0.875508	0.992245	1.61e-05	6.31e-05
CBO0226	CAL81778	3.5.05	Energy metabolism, carbon	Glycolysis	glyceraldehyde-3-phosphate dehydrogenase, type I	gap1, CBO0226	-0.209944	0.171664	0.487931	-0.59142	0.000770778	0.00223178
CBO0227	CAL81779	3.5.05	Energy metabolism, carbon	Glycolysis	phosphoglycerate kinase	pgK, CBO0227	-0.254738	0.198121	0.526842	-0.801138	0.000497642	0.00149683
CBO0228	CAL81780	3.5.05	Energy metabolism, carbon	Glycolysis	triosephosphate isomerase	tpiA, CBO0228	-0.0661096	0.762732	0.928675	-0.687822	0.000385992	0.0011864
CBO0229	CAL81781	3.5.05	Energy metabolism, carbon	Glycolysis	phosphoglyceromutase	gpmI, pgm-I, CBO0229	0.237538	0.323346	0.67317	-0.355224	0.14595	0.239172
CBO0230	CAL81782	3.5.05	Energy metabolism, carbon	Glycolysis	phosphopyruvate hydratase	eno, CBO0230	-0.0394211	0.802677	0.944412	-1.42927	3.88e-09	3.45e-08
CBO0231	CAL81783	1.5.05	Transport/binding proteins	Other	preprotein translocase, SecG subunit	secG, CBO0231	0.182466	0.198114	0.526842	0.389341	0.010377	0.0236431
CBO0232	CAL81784	2.1.02	Macromolecule degradation	Degradation of RNA	ribonuclease R	rnr, vacB, CBO0232	0.360307	0.0619147	0.264841	1.4511	1.79e-07	1.05e-06
CBO0233	CAL81785	1.4.0	Protection responses	Protection responses	stationary phase survival protein SurE	surE, CBO0233	-0.310418	0.0360233	0.183603	0.945965	0.000765505	0.00221815
CBO0234	CAL81786	2.2.10	Macromolecule synthesis, modification	Proteins - translation and modification	SsrA-binding protein	smpB, smqB, CBO0234	0.444037	0.0229838	0.134911	2.08475	4.85e-10	5.72e-09
CBO0235	CAL81787	1.5.0	Transport/binding proteins	Transport/binding proteins	sodium:dicarboxylate symporter family protein	CBO0235	-0.17515	0.269633	0.6181	-1.30087	7.83e-08	4.97e-07
CBO0237	CAL81788	7.0.0	Not classified	Not classified (included putative assignments)	FAD-binding protein	CBO0237	0.312691	0.0824376	0.321039	0.291569	0.0854931	0.152813
CBO0238	CAL81789	0.0.0	Unknown function	Unknown function, no known homologues	hypothetical protein	CBO0238	-0.0886296	0.511515	0.812053	0.205198	0.158947	0.256707
CBO0239	CAL81790	0.0.0	Unknown function	Unknown function, no known homologues	hypothetical protein	CBO0239	0.157275	0.220414	0.55793	-0.144143	0.36629	0.496673
CBO0240	CAL81791	0.0.0	Unknown function	Unknown function, no known homologues	hypothetical protein	CBO0240	0.110071	0.391854	0.730468	0.185856	0.129852	0.217129
CBO0241	CAL81793	7.0.0	Not classified	Not classified (included putative assignments)	amino acid decarboxylase	CBO0241	-0.112816	0.456426	0.780228	-0.545803	0.00393437	0.00981223
CBO0242	CAL81794	1.1.01	Cell processes	Chemotaxis and mobility	flagellin protein	CBO0242	0.23202	0.33966	0.685285	0.687281	0.0091886	0.0211807
CBO0243	CAL81795	7.0.0	Not classified	Not classified (included putative assignments)	vanadium-dependent haloperoxidase	CBO0243	0.288959	0.128528	0.416353	0.430363	0.00658515	0.0156471
CBO0244	CAL81796	0.0.02	Unknown function	Conserved in other than E.coli	hypothetical protein	CBO0244	0.288806	0.0639289	0.270807	0.24308	0.131324	0.219018
CBO0245	CAL81797	4.1.06	Cell envelope	G+ membrane	hypothetical protein	CBO0245	-0.113115	0.282533	0.632824	0.618905	0.00263525	0.00684451
CBO0246	CAL81798	3.4.03	Degradation of small molecules	Carbon compounds	malic enzyme	CBO0246	0.1295	0.640058	0.877404	-1.80359	2.57e-06	1.18e-05
CBO0247	CAL81799	1.5.03	Transport/binding proteins	Carbohydrates, organic acids and alcohols	2-keto-3-deoxygluconate permease	kdgT, CBO0247	0.395098	0.00768553	0.059786	-0.612117	0.0136507	0.0303249
CBO0248	CAL81800	6.1.01	Regulation	Sensor kinase	sensor histidine kinase	CBO0248	0.0979927	0.456721	0.780461	0.904428	0.000186297	0.000608375
CBO0249	CAL81801	6.1.02	Regulation	Response regulator	response regulator	CBO0249	0.384749	0.203141	0.533216	0.976344	1.84e-05	7.13e-05
CBO0250	CAL81802	1.5.01	Transport/binding proteins	Amino acids and amines	lysine-specific permease	CBO0250	0.295494	0.0644152	0.272208	0.611127	0.000261736	0.000830096
CBO0251	CAL81803	7.0.0	Not classified	Not classified (included putative assignments)	metallo-beta-lactamase superfamily protein	CBO0251	0.409056	0.0122032	0.084451	1.52824	1.58e-09	1.58e-08
CBO0252	CAL81804	7.0.0	Not classified	Not classified (included putative assignments)	GNAT family acetyltransferase	CBO0252	0.370322	0.00657437	0.0531113	2.05588	1.05e-09	1.1e-08
CBO0253	CAL81805	3.3.11	Central intermediary metabolism	Nucleotide interconversions	cytidine/deoxycytidylate deaminase	CBO0253	0.323576	0.0108619	0.0774156	1.59918	3.74e-11	6.51e-10
CBO0254	CAL81806	7.0.0	Not classified	Not classified (included putative assignments)	GNAT family acetyltransferase	CBO0254	0.315134	0.0409294	0.199537	1.82023	9.07e-09	7.27e-08
CBO0255	CAL81807	7.0.0	Not classified	Not classified (included putative assignments)	RibD domain-containing protein	CBO0255	0.462398	0.0569574	0.250935	0.767026	0.00328809	0.00834861
CBO0256	CAL81808	2.2.03	Macromolecule synthesis, modification	DNA - replication, repair, restriction/modification	DNA polymerase III subunit epsilon	CBO0256	0.383683	0.0306171	0.163997	1.13251	1.46e-06	7.07e-06
CBO0257	CAL81809	7.0.0	Not classified	Not classified (included putative assignments)	isochorismate family protein	CBO0257	0.165075	0.433242	0.763743	0.30194	0.159478	0.257368
CBO0258	CAL81810	3.4.05	Degradation of small molecules	Other	xanthine dehydrogenase, molybdenum binding subunit	xdhA1, CBO0258	0.457562	0.00393581	0.0359685	0.992211	9.78e-05	0.000335277
CBO0259	CAL81811	3.4.05	Degradation of small molecules	Other	xanthine dehydrogenase, FAD binding subunit	xdhB2, CBO0259	0.254711	0.0652379	0.27461	1.04188	9.29e-06	3.81e-05
CBO0260	CAL81812	3.4.05	Degradation of small molecules	Other	xanthine dehydrogenase iron-sulfur binding subunit	xdhC1, CBO0260	0.504863	0.0102491	0.0740328	0.765244	3.09e-05	0.000115238
CBO0261	CAL81813	4.1.07	Cell envelope	G+ exported/lipoprotein	hypothetical protein	CBO0261	0.291899	0.0756181	0.303793	0.429158	0.0124022	0.0278183
CBO0262	CAL81814	3.2.06	Biosynthesis of cofactors, carriers	Heme, porphyrin	cytochrome C biogenesis protein	ccdA1, CBO0262	0.260111	0.120106	0.400675	0.92583	0.000214164	0.000692052
CBO0263	CAL81815	3.2.06	Biosynthesis of cofactors, carriers	Heme, porphyrin	thiol-disulfide oxidoreductase ResA	resA, CBO0263	0.395954	0.0147554	0.0968737	0.687319	0.00237244	0.00622043
CBO0264	CAL81816	6.1.02	Regulation	Response regulator	DNA-binding response regulator	CBO0264	-0.0581573	0.737369	0.919668	0.469404	0.00322892	0.0082156
CBO0265	CAL81817	6.1.01	Regulation	Sensor kinase	sensor histidine kinase	CBO0265	0.224542	0.243385	0.587167	0.518133	0.0062262	0.0148592
CBO0266	CAL81818	7.0.0	Not classified	Not classified (included putative assignments)	FAD-dependent oxidoreductase	CBO0266	0.155173	0.518649	0.817111	-0.159441	0.507345	0.631702
CBO0267	CAL81819	3.4.03	Degradation of small molecules	Carbon compounds	glycosyl hydrolase	CBO0267	-0.271225	0.337131	0.684307	-0.198016	0.292827	0.418472
CBO0268	CAL81820	1.5.03	Transport/binding proteins	Carbohydrates, organic acids and alcohols	PTS system, maltose/glucose-specfic, IIBC component	CBO0268	0.122065	0.524911	0.820147	-0.091974	0.553094	0.672439
CBO0269	CAL81821	6.5.0	Regulation	Others	transcriptional regulator	CBO0269	0.0926706	0.563112	0.841767	0.1833	0.178154	0.281997
CBO0270	CAL81822	6.5.0	Regulation	Others	transcriptional regulator	CBO0270	-0.105092	0.416333	0.750231	0.395105	0.0594581	0.111604
CBO0271	CAL81823	1.5.03	Transport/binding proteins	Carbohydrates, organic acids and alcohols	PTS system glucose family transporter subunit IIA	CBO0271	0.089078	0.585952	0.852394	-0.19306	0.17364	0.275989
CBO0272	CAL81824	6.1.02	Regulation	Response regulator	DNA-binding response regulator	CBO0272	-0.0198457	0.885708	0.97091	0.999471	1.77e-06	8.42e-06
CBO0273	CAL81825	6.1.01	Regulation	Sensor kinase	sensor histidine kinase	CBO0273	-0.12407	0.408106	0.743177	0.059573	0.68621	0.783607
CBO0274	CAL81826	1.5.0	Transport/binding proteins	Transport/binding proteins	peptide ABC transporter Pep4E family, ATP-binding protein	CBO0274	0.338537	0.0684504	0.283773	-1.23168	1.12e-06	5.55e-06
CBO0275	CAL81827	1.5.0	Transport/binding proteins	Transport/binding proteins	peptide ABC transporter Pep4E family, permease	CBO0275	0.91362	0.0016831	0.0188618	-1.21288	0.000111361	0.000378099
CBO0276	CAL81828	4.1.09	Cell envelope	G+ peptidoglycan, teichoic acid	alanine racemase	CBO0276	0.761876	0.00407293	0.0370067	-0.637613	0.0132064	0.0294251
CBO0277	CAL81829	1.5.03	Transport/binding proteins	Carbohydrates, organic acids and alcohols	PTS system, glucose/glucoside family, IIBC component	CBO0277	0.140087	0.405099	0.740747	-0.334808	0.0103213	0.0235264
CBO0278	CAL81830	3.4.03	Degradation of small molecules	Carbon compounds	maltose-6'-phosphate glucosidase	glvA1, glvG1, CBO0278	-0.167672	0.320252	0.668942	-0.951473	1.44e-05	5.68e-05
CBO0279	CAL81831	1.5.03	Transport/binding proteins	Carbohydrates, organic acids and alcohols	PTS system glucose/glucoside family transporter subunit IIA	ptsG, ptsX, crr, CBO0279	-0.639615	0.000108226	0.00223511	-1.4887	7.07e-08	4.52e-07
CBO0280	CAL81832	6.5.0	Regulation	Others	transcriptional regulator	CBO0280	0.328039	0.0973752	0.354229	0.888456	0.000348255	0.00107926
CBO0281	CAL81833	0.0.02	Unknown function	Conserved in other than E.coli	hypothetical protein	CBO0281	-0.0716657	0.610133	0.865177	-0.0598835	0.638592	0.744906
CBO0282	CAL81834	1.6.01	Adaptation	Adaptations, atypical conditions	cold shock protein	cspA, CBO0282	2.71757	1.17783e-09	3.94372e-07	3.86717	2.86e-12	7.76e-11
CBO0283	CAL81835	4.1.06	Cell envelope	G+ membrane	hypothetical protein	CBO0283	-0.480932	0.0206766	0.124969	-0.774315	0.000198922	0.000647318
CBO0284	CAL81836	6.5.0	Regulation	Others	transcriptional regulator	CBO0284	-0.157948	0.323693	0.67323	1.24119	2.32e-07	1.32e-06
CBO0285	CAL81837	7.0.0	Not classified	Not classified (included putative assignments)	2-hydroxychromene-2-carboxylate isomerase	CBO0285	0.438789	0.0335465	0.17504	2.10107	8.43e-12	1.88e-10
CBO0286	CAL81838	0.0.02	Unknown function	Conserved in other than E.coli	hypothetical protein	CBO0286	0.127504	0.285233	0.634171	1.13029	4.76e-09	4.12e-08
CBO0287	CAL81839	6.5.0	Regulation	Others	transcriptional regulator	CBO0287	-0.332129	0.0270832	0.15071	0.199618	0.166161	0.266172
CBO0288	CAL81840	1.5.03	Transport/binding proteins	Carbohydrates, organic acids and alcohols	PTS system glucose/maltose-specfic transporter subunit IIBC	CBO0288	0.0527486	0.664569	0.887804	0.0845092	0.488964	0.614701
CBO0289	CAL81841	3.4.03	Degradation of small molecules	Carbon compounds	maltose-6'-phosphate glucosidase	glvA2, glvG2, CBO0289	-0.1101	0.358543	0.703987	-0.972028	1.52e-06	7.32e-06
CBO0290	CAL81842	1.5.03	Transport/binding proteins	Carbohydrates, organic acids and alcohols	PTS system glucose/maltose-specific transporter subunit IIA	CBO0290	-0.136839	0.382207	0.722411	-0.47157	0.0213688	0.0452903
CBO0291	CAL81843	7.0.0	Not classified	Not classified (included putative assignments)	dihydroxy-acid dehydratase	CBO0291	-0.0432257	0.744881	0.922882	-0.564876	0.000473344	0.00143113
CBO0292	CAL81844	3.4.03	Degradation of small molecules	Carbon compounds	2-dehydro-3-deoxyphosphogluconate aldolase	kdgA, CBO0292	-0.00418107	0.977294	0.99474	-0.220653	0.106652	0.184236
CBO0293	CAL81845	3.4.03	Degradation of small molecules	Carbon compounds	2-dehydro-3-deoxygluconokinase	kdgK, CBO0293	0.054487	0.706431	0.906483	-0.166256	0.251057	0.37094
CBO0294	CAL81846	3.4.02	Degradation of small molecules	Amino acids	adenine deaminase	adeC, ade, CBO0294	-0.377956	0.0378107	0.189442	-1.28369	2.89e-06	1.32e-05
CBO0295	CAL81847	6.1.02	Regulation	Response regulator	DNA-binding response regulator	cssR, CBO0295	-0.0293793	0.837691	0.954305	0.103679	0.472595	0.599616
CBO0296	CAL81848	6.1.01	Regulation	Sensor kinase	sensor histidine kinase	cssS, CBO0296	-0.117817	0.364126	0.709442	-0.419025	0.00890408	0.0205731
CBO0297	CAL81849	4.1.04	Cell envelope	Surface polysaccharides & antigens	glycosyl transferase family protein	CBO0297	-0.0979773	0.503718	0.808253	-0.0259219	0.858797	0.90797
CBO0298	CAL81850	4.1.04	Cell envelope	Surface polysaccharides & antigens	cell wall teichoic acid glycosylation protein GtcA	CBO0298	0.0807834	0.547482	0.833437	0.284405	0.0441603	0.0862114
CBO0299	CAL81851	4.1.04	Cell envelope	Surface polysaccharides & antigens	dolichyl-phosphate-mannose-protein mannosyltransferase	CBO0299	0.152547	0.378292	0.720376	0.365626	0.0689903	0.126908
CBO0300	CAL81852	6.3.02	Regulation	AraC	AraC family transcriptional regulator	CBO0300	-0.0138703	0.938534	0.985559	0.25889	0.161124	0.259424
CBO0301	CAL81853	1.6.03	Adaptation	Fe storage	iron chelate uptake ABC transporter FeCT family, solute-binding protein	CBO0301	-0.026639	0.802746	0.944412	-0.0349814	0.743046	0.825916
CBO0302	CAL81854	1.6.03	Adaptation	Fe storage	iron ABC transporter permease	CBO0302	-0.0733254	0.50148	0.807246	-0.249187	0.031136	0.063314
CBO0303	CAL81855	1.6.03	Adaptation	Fe storage	iron ABC transporter ATP-binding protein	CBO0303	-0.0350519	0.807082	0.945383	-0.341553	0.0325971	0.0658766
CBO0304	CAL81856	1.5.0	Transport/binding proteins	Transport/binding proteins	drug/sodium antiporter	CBO0304	0.130539	0.434685	0.76431	0.0396641	0.751734	0.832457
CBO0305	CAL81857	6.3.02	Regulation	AraC	AraC family transcriptional regulator	CBO0305	-0.446782	0.00686979	0.054906	-1.17512	2.06e-06	9.69e-06
CBO0306	CAL81858	1.6.03	Adaptation	Fe storage	ferrichrome-binding protein	CBO0306	0.14398	0.299371	0.649284	-0.148236	0.430933	0.559675
CBO0307	CAL81859	0.0.0	Unknown function	Unknown function, no known homologues	hypothetical protein	CBO0307	0.055844	0.750909	0.92422	0.159258	0.267157	0.389318
CBO0308	CAL81860	6.3.02	Regulation	AraC	AraC family transcriptional regulator	CBO0308	-0.0625465	0.76433	0.928929	0.871139	2.02e-06	9.51e-06
CBO0309	CAL81861	7.0.0	Not classified	Not classified (included putative assignments)	NADH dehydrogenase subunit 1 (partial)	CBO0309	0.154673	0.221729	0.559545	0.0775166	0.607387	0.719167
CBO0310	CAL81862	1.6.03	Adaptation	Fe storage	ferrichrome-binding protein	fhuD1, CBO0310	-0.120804	0.360512	0.705352	0.0497834	0.643381	0.748496
CBO0311	CAL81863	1.6.03	Adaptation	Fe storage	iron compound ABC transporter permease	fhuB1, CBO0311	-0.0535822	0.615175	0.865999	0.0902402	0.633287	0.74097
CBO0312	CAL81864	1.6.03	Adaptation	Fe storage	iron compound ABC transporter permease	fhuG1, CBO0312	-0.0857954	0.439587	0.767849	0.0666813	0.546763	0.666543
CBO0313	CAL81865	1.6.03	Adaptation	Fe storage	ferrichrome ABC transporter ATP-binding protein	fhuC1, CBO0313	-0.139341	0.359165	0.703987	-0.35698	0.0812937	0.146342
CBO0314	CAL81866	1.5.0	Transport/binding proteins	Transport/binding proteins	ABC transporter permease/ATP-binding protein	CBO0314	0.166116	0.202521	0.532315	-0.042173	0.742364	0.825566
CBO0315	CAL81867	6.5.0	Regulation	Others	iron dependent repressor	CBO0315	-1.31259	6.23302e-07	3.90605e-05	-0.449189	0.021393	0.0453356
CBO0316	CAL81868	1.5.05	Transport/binding proteins	Other	xanthine/uracil permease	pbuX, CBO0316	0.0600848	0.663587	0.887698	2.18228	4.62e-12	1.15e-10
CBO0317	CAL81869	3.3.17	Central intermediary metabolism	Salvage of nucleosides and nucleotides	xanthine phosphoribosyltransferase	xpt, CBO0317	0.248637	0.482323	0.798224	1.4077	0.00067986	0.00198903
CBO0318	CAL81870	6.1.02	Regulation	Response regulator	DNA-binding response regulator	CBO0318	0.0532702	0.683847	0.89693	1.2266	6.31e-09	5.29e-08
CBO0319	CAL81871	6.1.01	Regulation	Sensor kinase	sensor histidine kinase	CBO0319	0.23756	0.140563	0.43767	0.622067	0.00114671	0.00320928
CBO0320	CAL81872	1.4.03	Protection responses	Drug/analogue sensitivity	UDP pyrophosphate phosphatase	upk1, CBO0320	0.157493	0.254414	0.598743	0.174599	0.208195	0.320019
CBO0321	CAL81873	1.5.0	Transport/binding proteins	Transport/binding proteins	peptide ABC transporter Pep4E family, ATP-binding protein	CBO0321	-0.171846	0.220588	0.558126	-0.303815	0.0373397	0.0743253
CBO0322	CAL81874	1.5.0	Transport/binding proteins	Transport/binding proteins	peptide ABC transporter Pep4E family, permease	CBO0322	-0.322249	0.111383	0.384983	-0.26685	0.0228337	0.0480522
CBO0323	CAL81875	0.0.0	Unknown function	Unknown function, no known homologues	hypothetical protein	CBO0323	-0.0946766	0.490498	0.801181	-0.151296	0.330187	0.459833
CBO0324	CAL81876	4.1.06	Cell envelope	G+ membrane	LrgA family protein	CBO0324	-0.497599	0.0094402	0.0697351	-1.34508	1.01e-07	6.24e-07
CBO0325	CAL81877	4.1.06	Cell envelope	G+ membrane	lrgB-like family protein	CBO0325	0.121546	0.543787	0.831237	-1.22819	5.51e-06	2.37e-05
CBO0326	CAL81878	4.1.07	Cell envelope	G+ exported/lipoprotein	lipoprotein	CBO0326	0.11846	0.44284	0.770733	-1.05323	3.88e-05	0.000142355
CBO0327	CAL81879	7.0.0	Not classified	Not classified (included putative assignments)	radical SAM superfamily protein	CBO0327	0.0698181	0.653316	0.883774	0.246525	0.123672	0.20851
CBO0328	CAL81880	0.0.02	Unknown function	Conserved in other than E.coli	hypothetical protein	CBO0328	-0.0895367	0.560569	0.839999	-0.258375	0.103722	0.180202
CBO0329	CAL81881	0.0.02	Unknown function	Conserved in other than E.coli	hypothetical protein	CBO0329	-0.914398	0.000239023	0.00425509	-1.45636	4.29e-08	2.88e-07
CBO0330	CAL81882	4.1.06	Cell envelope	G+ membrane	hypothetical protein	CBO0330	-0.231822	0.194778	0.521492	-0.234862	0.110693	0.190048
CBO0331	CAL81883	4.1.06	Cell envelope	G+ membrane	hypothetical protein	CBO0331	-0.138514	0.414533	0.748623	0.364575	0.040802	0.0802626
CBO0332	CAL81884	4.1.06	Cell envelope	G+ membrane	accessory gene regulator protein B	CBO0332	0.0597732	0.599355	0.859413	0.34998	0.167629	0.26824
CBO0333	CAL81886	7.0.0	Not classified	Not classified (included putative assignments)	diguanylate cyclase	CBO0333	0.0360788	0.82927	0.951668	-0.738275	0.0009706	0.0027576
CBO0334	CAL81887	7.0.0	Not classified	Not classified (included putative assignments)	GNAT family acetyltransferase	CBO0334	-0.489241	0.00351713	0.0329851	-0.994026	1.88e-06	8.89e-06
CBO0335	CAL81888	4.1.06	Cell envelope	G+ membrane	hypothetical protein	CBO0335	0.461324	0.00964367	0.0709502	1.40599	4.37e-08	2.93e-07
CBO0336	CAL81889	6.1.01	Regulation	Sensor kinase	two-component sensor histidine kinase	CBO0336	0.213151	0.170818	0.486282	0.250815	0.110341	0.189567
CBO0337	CAL81890	4.1.06	Cell envelope	G+ membrane	hypothetical protein	CBO0337	1.19125	2.53722e-07	1.99641e-05	3.99254	2.6e-14	1.88e-12
CBO0338	CAL81891	4.1.06	Cell envelope	G+ membrane	accessory gene regulator protein B	CBO0338	0.354332	0.014079	0.0933995	1.85294	1.14e-10	1.66e-09
CBO0339	CAL81892	0.0.0	Unknown function	Unknown function, no known homologues	hypothetical protein	CBO0339	0.205402	0.234717	0.575999	-0.693885	0.000734428	0.00213636
CBO0340	CAL81893	6.1.01	Regulation	Sensor kinase	two-component sensor kinase	CBO0340	-0.20514	0.284653	0.634062	-0.832539	0.000108954	0.000370406
CBO0341	CAL81894	0.0.02	Unknown function	Conserved in other than E.coli	PP-loop family protein	CBO0341	0.292857	0.0496756	0.228714	1.10624	2.04e-07	1.18e-06
CBO0342	CAL81895	6.5.0	Regulation	Others	DNA-binding protein	CBO0342	0.435532	0.0153211	0.0997053	1.52914	1.61e-08	1.2e-07
CBO0343	CAL81896	1.5.01	Transport/binding proteins	Amino acids and amines	amino acid permease	CBO0343	0.55288	0.000766022	0.0104552	2.18472	1.51e-11	3.06e-10
CBO0344	CAL81897	2.1.04	Macromolecule degradation	Degradation of proteins, peptides, glycoproteins	metallopeptidase	CBO0344	-0.870909	0.00223764	0.0233668	-1.32702	7.05e-07	3.66e-06
CBO0345	CAL81898	3.5.04	Energy metabolism, carbon	Fermentation	bifunctional acetaldehyde-CoA/alcohol dehydrogenase	adhE, aad, CBO0345	-0.160311	0.348642	0.694679	0.405913	0.0807258	0.145436
CBO0346	CAL81899	0.0.02	Unknown function	Conserved in other than E.coli	hypothetical protein	CBO0346	0.920589	0.000292156	0.00497045	6.11301	1.44e-18	9.88e-16
CBO0347	CAL81900	4.1.06	Cell envelope	G+ membrane	hypothetical protein	CBO0347	0.546154	0.00302272	0.0293271	5.91877	4.86e-19	4.25e-16
CBO0348	CAL81901	0.0.02	Unknown function	Conserved in other than E.coli	hypothetical protein	CBO0348	0.0846538	0.597939	0.858689	0.262215	0.0478519	0.0924776
CBO0349	CAL81902	7.0.0	Not classified	Not classified (included putative assignments)	carbohydrate-binding protein	CBO0349	-0.118547	0.453473	0.778392	-0.10645	0.383578	0.514084
CBO0350	CAL81903	7.0.0	Not classified	Not classified (included putative assignments)	PAP2 family protein	CBO0350	0.205361	0.27491	0.623561	-0.322451	0.0283146	0.0582085
CBO0351	CAL81904	2.1.03	Macromolecule degradation	Degradation of polysaccharides	polysaccharide deacetylase	CBO0351	0.189571	0.253446	0.597794	-1.45549	2.03e-05	7.81e-05
CBO0352	CAL81905	6.1.02	Regulation	Response regulator	DNA-binding response regulator	CBO0352	0.183228	0.545572	0.832545	-0.458908	0.0149011	0.0328153
CBO0353	CAL81906	6.1.01	Regulation	Sensor kinase	sensor histidine kinase	CBO0353	-0.347862	0.0324382	0.170965	-1.43126	7.32e-07	3.79e-06
CBO0354	CAL81907	4.1.07	Cell envelope	G+ exported/lipoprotein	lipoprotein	CBO0354	0.130144	0.416849	0.750231	-1.54938	6.83e-09	5.66e-08
CBO0355	CAL81908	0.0.02	Unknown function	Conserved in other than E.coli	hypothetical protein	CBO0355	0.58201	0.000757736	0.0103962	-0.491157	0.00313825	0.00801082
CBO0356	CAL81909	4.1.06	Cell envelope	G+ membrane	DedA family protein	CBO0356	1.25962	7.19493e-07	4.37169e-05	-0.660951	1.39e-05	5.53e-05
CBO0357	CAL81910	7.0.0	Not classified	Not classified (included putative assignments)	signaling protein	CBO0357	0.173672	0.369337	0.713461	0.561781	0.00818346	0.019031
CBO0358	CAL81911	4.1.07	Cell envelope	G+ exported/lipoprotein	exported protein	CBO0358	-0.199725	0.160203	0.469745	-0.377307	0.00835276	0.0194018
CBO0359	CAL81912	1.4.03	Protection responses	Drug/analogue sensitivity	MATE efflux family protein	CBO0359	-0.082554	0.54813	0.833745	0.0914379	0.506395	0.630619
CBO0360	CAL81913	7.0.0	Not classified	Not classified (included putative assignments)	metal dependent phosphohydrolase	CBO0360	-0.315999	0.127256	0.41385	-3.22169	1.49e-12	4.56e-11
CBO0361	CAL81914	1.5.02	Transport/binding proteins	Cations	transporter monovalent cation:proton antiporter-2 (CPA2) family	CBO0361	0.407998	0.00155894	0.0178033	-0.326539	0.00816124	0.018985
CBO0362	CAL81915	7.0.0	Not classified	Not classified (included putative assignments)	class V aminotransferase	CBO0362	-0.009601	0.962146	0.990931	-0.128159	0.308706	0.4359
CBO0363	CAL81916	4.1.06	Cell envelope	G+ membrane	hypothetical protein	CBO0363	-0.126147	0.411314	0.746235	-0.353234	0.0190903	0.0409576
CBO0364	CAL81917	7.0.0	Not classified	Not classified (included putative assignments)	hypothetical protein	CBO0364	0.459722	0.0377435	0.189343	2.03683	6.63e-09	5.53e-08
CBO0365	CAL81918	6.1.02	Regulation	Response regulator	DNA-binding response regulator	CBO0365	0.380027	0.0639895	0.270991	1.48473	8.3e-06	3.44e-05
CBO0366	CAL81919	6.1.01	Regulation	Sensor kinase	sensor histidine kinase	CBO0366	1.37741	0.00090099	0.0117026	0.875908	5.61e-07	2.97e-06
CBO0367	CAL81920	1.5.0	Transport/binding proteins	Transport/binding proteins	sodium:solute symporter family protein	CBO0367	-0.140287	0.304857	0.654639	-1.44253	1.73e-07	1.02e-06
CBO0368	CAL81921	3.5.03	Energy metabolism, carbon	Electron transport	RnfABCDGE type electron transport complex subunit C	rnfC, CBO0368	-0.23063	0.558343	0.8381	-2.97912	3.1e-07	1.73e-06
CBO0369	CAL81922	3.5.03	Energy metabolism, carbon	Electron transport	RnfABCDGE type electron transport complex subunit D	rnfD, CBO0369	0.210085	0.282864	0.633204	-0.679792	0.00202936	0.0053846
CBO0370	CAL81923	3.5.03	Energy metabolism, carbon	Electron transport	electron transport complex, RnfABCDGE type, G subunit	rnfG, CBO0370	0.127376	0.506019	0.809161	-1.02134	2.1e-06	9.85e-06
CBO0371	CAL81924	3.5.03	Energy metabolism, carbon	Electron transport	electron transport complex protein RsxE	rnfE, CBO0371	0.12878	0.559367	0.839048	0.124961	0.727015	0.813845
CBO0372	CAL81925	3.5.03	Energy metabolism, carbon	Electron transport	RnfABCDGE type electron transport complex subunit A	rnfA, CBO0372	0.777685	0.0126032	0.0864212	1.13305	5.39e-07	2.86e-06
CBO0373	CAL81926	3.5.03	Energy metabolism, carbon	Electron transport	ferredoxin	rnfB, CBO0373	0.146307	0.223722	0.561964	0.286579	0.382677	0.513444
CBO0374	CAL81927	4.1.08	Cell envelope	G+ surface anchored	amidase domain protein	CBO0374	-0.357738	0.0187334	0.115294	-0.913035	3.13e-07	1.74e-06
CBO0375	CAL81928	4.1.06	Cell envelope	G+ membrane	hypothetical protein	CBO0375	0.268032	0.127566	0.414495	0.904631	1.79e-06	8.5e-06
CBO0376	CAL81929	4.1.07	Cell envelope	G+ exported/lipoprotein	hypothetical protein	CBO0376	0.328067	0.139396	0.436059	0.90592	0.000125339	0.000422098
CBO0377	CAL81930	4.1.07	Cell envelope	G+ exported/lipoprotein	apbE family protein	CBO0377	0.423309	0.00701157	0.0557278	1.04519	4.8e-07	2.57e-06
CBO0378	CAL81931	4.1.05	Cell envelope	Surface structures	cell surface protein	CBO0378	-0.280672	0.408615	0.743826	-0.313727	0.35676	0.487102
CBO0379	CAL81932	4.1.05	Cell envelope	Surface structures	cell surface protein	CBO0379	0.460877	0.00388081	0.0356027	-0.100226	0.428884	0.557613
CBO0380	CAL81933	4.1.05	Cell envelope	Surface structures	cell surface protein	CBO0380	0.3351	0.0454442	0.215072	-0.905102	0.00082657	0.00237715
CBO0381	CAL81934	4.1.07	Cell envelope	G+ exported/lipoprotein	exported protein	CBO0381	0.29903	0.349454	0.695536	1.30111	0.000521075	0.00156253
CBO0382	CAL81935	7.0.0	Not classified	Not classified (included putative assignments)	acyltransferase	CBO0382	-0.375088	0.034124	0.177055	-0.525973	0.00471383	0.0115476
CBO0383	CAL81936	4.1.07	Cell envelope	G+ exported/lipoprotein	exported protein	CBO0383	0.252442	0.090506	0.33858	-1.42055	5.31e-09	4.54e-08
CBO0384	CAL81937	1.5.0	Transport/binding proteins	Transport/binding proteins	ABC transporter solute-binding protein	CBO0384	-0.116552	0.507896	0.809885	-0.635267	0.000248306	0.000791653
CBO0385	CAL81938	1.5.0	Transport/binding proteins	Transport/binding proteins	phosphate ABC transporter permease	CBO0385	-0.0900828	0.554053	0.8361	-1.42756	8.17e-08	5.16e-07
CBO0386	CAL81939	1.5.0	Transport/binding proteins	Transport/binding proteins	ABC transporter permease	CBO0386	-0.811185	0.00962026	0.0708442	-0.839814	6.84e-06	2.88e-05
CBO0387	CAL81940	1.5.0	Transport/binding proteins	Transport/binding proteins	ABC transporter ATP-binding protein	CBO0387	-0.609759	0.00297525	0.0290096	-1.2662	1.03e-06	5.13e-06
CBO0388	CAL81941	0.0.02	Unknown function	Conserved in other than E.coli	hypothetical protein	CBO0388	-0.675941	0.00157013	0.0178862	-1.86024	4.41e-09	3.87e-08
CBO0389	CAL81942	1.5.01	Transport/binding proteins	Amino acids and amines	amino acid permease	CBO0389	3.99412	2.42371e-11	2.72442e-08	7.49435	3.07e-16	6.04e-14
CBO0390	CAL81943	1.8.01	Differentiation/sporulation/Germination	Differentiation/sporulation/Germination	forespore-specific lipoprotein	CBO0390	0.0503954	0.691577	0.899778	-0.203279	0.120748	0.204257
CBO0391	CAL81944	0.0.02	Unknown function	Conserved in other than E.coli	hypothetical protein	CBO0391	-0.354963	0.13158	0.42207	-2.63716	1.69e-09	1.67e-08
CBO0392	CAL81945	0.0.02	Unknown function	Conserved in other than E.coli	hypothetical protein	CBO0392	-0.480081	0.00289653	0.0283993	-0.535709	0.000712046	0.00207662
CBO0393	CAL81946	2.2.03	Macromolecule synthesis, modification	DNA - replication, repair, restriction/modification	single-strand binding protein	CBO0393	-0.659241	0.000672781	0.00945317	-1.28443	5.38e-07	2.86e-06
CBO0394	CAL81947	4.1.06	Cell envelope	G+ membrane	hypothetical protein	CBO0394	0.217615	0.0949552	0.348893	-0.312995	0.0477645	0.0923427
CBO0395	CAL81948	6.5.0	Regulation	Others	ferric uptake regulation protein	CBO0395	-0.396638	0.00751554	0.0587833	-0.67577	6.51e-05	0.000229712
CBO0396	CAL81949	4.1.07	Cell envelope	G+ exported/lipoprotein	exported protein	CBO0396	-0.246012	0.381727	0.722078	0.136102	0.377336	0.508214
CBO0397	CAL81950	7.0.0	Not classified	Not classified (included putative assignments)	metal dependent phosphohydrolase	CBO0397	-0.9933	2.80291e-06	0.000124252	-1.95408	7.96e-11	1.23e-09
CBO0398	CAL81951	4.1.06	Cell envelope	G+ membrane	membrane associated peptidase	CBO0398	0.166034	0.287249	0.635447	-0.1258	0.311855	0.4394
CBO0399	CAL81952	1.1.01	Cell processes	Chemotaxis and mobility	methyl-accepting chemotaxis protein	CBO0399	-0.0556442	0.727959	0.916104	0.0998215	0.534102	0.655645
CBO0400	CAL81953	1.7.01	Cell division	Cell division	cell division protein	ftsH, CBO0400	-0.016828	0.90102	0.975344	-0.179274	0.143824	0.236185
CBO0401	CAL81954	0.0.02	Unknown function	Conserved in other than E.coli	hypothetical protein	CBO0401	-0.273205	0.0760327	0.304663	0.623289	0.000407637	0.00124805
CBO0402	CAL81955	2.1.02	Macromolecule degradation	Degradation of RNA	ribonuclease H	rnhA, rnh, CBO0402	0.114904	0.375401	0.718435	1.92583	1.41e-09	1.43e-08
CBO0403	CAL81956	4.1.07	Cell envelope	G+ exported/lipoprotein	hypothetical protein	CBO0403	0.0588948	0.735814	0.919389	-0.442559	0.0972086	0.170619
CBO0404	CAL81957	6.5.0	Regulation	Others	tetratricopeptide repeat/DNA binding domain-containing protein	CBO0404	-0.293595	0.0381026	0.190356	-0.109451	0.397734	0.52744
CBO0405	CAL81958	6.5.0	Regulation	Others	tetratricopeptide repeat protein	CBO0405	-0.689459	0.0328894	0.172757	1.02103	3.84e-05	0.000140898
CBO0406	CAL81959	0.0.0	Unknown function	Unknown function, no known homologues	hypothetical protein	CBO0406	-0.103089	0.505948	0.809161	-0.323333	0.0205237	0.0437337
CBO0407	CAL81960	7.0.0	Not classified	Not classified (included putative assignments)	DJ-1/PfpI family protein	CBO0407	0.265564	0.115519	0.39171	1.36916	5.42e-06	2.33e-05
CBO0408	CAL81961	0.0.02	Unknown function	Conserved in other than E.coli	hypothetical protein	CBO0408	0.489908	0.0138417	0.0924132	-0.378527	0.0497522	0.0955868
CBO0409	CAL81962	1.3.01	Cell processes	Chaperones	ClpA-type chaperone	clpB, htpM, CBO0409	-0.541277	0.00879193	0.066359	-0.965786	3.72e-07	2.04e-06
CBO0410	CAL81963	0.0.02	Unknown function	Conserved in other than E.coli	CobB/CobQ family glutamine amidotransferase	CBO0410	-1.41043	1.98925e-07	1.65634e-05	-3.45935	6.05e-14	3.78e-12
CBO0411	CAL81964	7.0.0	Not classified	Not classified (included putative assignments)	UDP-N-acetylmuramyl tripeptide synthetase-like protein	CBO0411	-1.28257	2.66049e-07	2.06247e-05	-1.27851	2.79e-07	1.57e-06
CBO0412	CAL81965	3.4.03	Degradation of small molecules	Carbon compounds	mannose-6-phosphate isomerase	CBO0412	0.0503348	0.727012	0.915773	-0.142829	0.386838	0.517438
CBO0413	CAL81966	4.1.07	Cell envelope	G+ exported/lipoprotein	lipoprotein	CBO0413	-0.0464663	0.762187	0.928504	0.382971	0.0204571	0.043602
CBO0414	CAL81967	1.4.03	Protection responses	Drug/analogue sensitivity	UDP pyrophosphate phosphatase	upk2, CBO0414	0.369651	0.0814213	0.318278	0.710255	0.00306775	0.00785122
CBO0415	CAL81968	4.1.07	Cell envelope	G+ exported/lipoprotein	metallo beta-lactamase superfamily lipoprotein	CBO0415	0.418606	0.0138689	0.0924132	1.67412	2.32e-08	1.68e-07
CBO0416	CAL81969	7.0.0	Not classified	Not classified (included putative assignments)	1-acyl-sn-glycerol-3-phosphate acyltransferase	CBO0416	0.101741	0.49661	0.804626	0.826666	4.1e-06	1.81e-05
CBO0417	CAL81970	3.1.12	Amino acid biosynthesis	Leucine	HMGL-related enzyme	CBO0417	-0.0692167	0.582371	0.85122	1.64706	4.86e-11	8.11e-10
CBO0418	CAL81971	3.5.08	Energy metabolism, carbon	TCA cycle	aconitate hydratase	CBO0418	-0.359291	0.0333446	0.174392	1.61422	2.56e-09	2.4e-08
CBO0419	CAL81972	3.5.08	Energy metabolism, carbon	TCA cycle	isocitrate/isopropylmalate family dehydrogenase	CBO0419	-0.141888	0.421885	0.754092	1.18745	6.42e-07	3.36e-06
CBO0420	CAL81973	1.5.01	Transport/binding proteins	Amino acids and amines	polar amino acid ABC transporter ATP-binding protein	CBO0420	0.169325	0.486193	0.79925	0.887129	0.00146173	0.00400055
CBO0421	CAL81974	1.5.02	Transport/binding proteins	Cations	Na+/H+ antiporter family protein	CBO0421	0.960744	0.0001038	0.00215786	2.37589	3.66e-11	6.41e-10
CBO0422	CAL81975	4.1.06	Cell envelope	G+ membrane	hypothetical protein	CBO0422	0.289401	0.026637	0.148912	0.931043	7.4e-06	3.1e-05
CBO0423	CAL81976	3.2.10	Biosynthesis of cofactors, carriers	Pantothenate	aspartate alpha-decarboxylase	panD, CBO0423	0.229949	0.135779	0.429325	1.02368	5.45e-07	2.89e-06
CBO0424	CAL81977	3.2.10	Biosynthesis of cofactors, carriers	Pantothenate	pantoate--beta-alanine ligase	panC, CBO0424	0.0350237	0.837969	0.954305	2.01626	3.1e-10	3.87e-09
CBO0425	CAL81978	3.2.10	Biosynthesis of cofactors, carriers	Pantothenate	3-methyl-2-oxobutanoate hydroxymethyltransferase	panB, CBO0425	0.258491	0.428401	0.759404	2.22533	4.68e-11	7.88e-10
CBO0426	CAL81979	2.1.01	Macromolecule degradation	Degradation of DNA	ATP-dependent nuclease subunit B	addB, CBO0426	-0.168545	0.380622	0.721842	-0.716842	0.000229076	0.000735709
CBO0427	CAL81980	0.0.0	Unknown function	Unknown function, no known homologues	hypothetical protein	CBO0427	-0.175935	0.236769	0.578666	-0.328162	0.09732	0.170783
CBO0428	CAL81981	0.0.02	Unknown function	Conserved in other than E.coli	tetratricopeptide repeat protein	CBO0428	-0.531717	0.000794566	0.0107331	0.136973	0.25649	0.377197
CBO0429	CAL81982	0.0.02	Unknown function	Conserved in other than E.coli	hypothetical protein	CBO0429	-0.373408	0.0728534	0.296252	-0.231035	0.201874	0.31244
CBO0430	CAL81983	6.3.08	Regulation	TetR	TetR family transcriptional regulator	CBO0430	-0.301956	0.0392085	0.193266	0.459822	0.00320989	0.00817246
CBO0431	CAL81984	2.2.09	Macromolecule synthesis, modification	Protein modification	hydrogenase nickel incorporation protein HypB	hypB, CBO0431	-0.151731	0.322785	0.672359	-0.241976	0.160015	0.257981
CBO0432	CAL81985	7.0.0	Not classified	Not classified (included putative assignments)	pyridine nucleotide-disulfide oxidoreductase	CBO0432	-0.113403	0.405536	0.741135	-0.182007	0.238896	0.357062
CBO0433	CAL81986	2.2.09	Macromolecule synthesis, modification	Protein modification	hydrogenase nickel incorporation protein HypA	hypA, CBO0433	-0.118289	0.499878	0.806249	-0.273554	0.128261	0.214705
CBO0434	CAL81987	4.1.06	Cell envelope	G+ membrane	hypothetical protein	CBO0434	-0.0945	0.530855	0.823223	0.218818	0.155817	0.252636
CBO0435	CAL81988	4.1.07	Cell envelope	G+ exported/lipoprotein	hypothetical protein	CBO0435	-1.05438	0.000276785	0.0047656	-0.609307	0.0186693	0.0402024
CBO0436	CAL81989	2.1.01	Macromolecule degradation	Degradation of DNA	recombination helicase AddA	addA, CBO0436	0.259893	0.123918	0.408125	0.957243	1.07e-05	4.34e-05
CBO0437	CAL81990	1.1.01	Cell processes	Chemotaxis and mobility	methyl-accepting chemotaxis protein	CBO0437	-0.422843	0.0149773	0.0979624	-0.491628	0.0057722	0.0138725
CBO0438	CAL81991	2.1.04	Macromolecule degradation	Degradation of proteins, peptides, glycoproteins	peptidase T	pepT, CBO0438	-0.407733	0.00671739	0.053983	-1.07049	1.79e-07	1.05e-06
CBO0439	CAL81992	7.0.0	Not classified	Not classified (included putative assignments)	phospholipase	CBO0439	0.279697	0.0293814	0.15966	2.13929	1.17e-11	2.45e-10
CBO0440	CAL81993	0.0.0	Unknown function	Unknown function, no known homologues	hypothetical protein	CBO0440	-0.0526478	0.627633	0.872263	0.147456	0.481556	0.607524
CBO0441	CAL81994	4.1.06	Cell envelope	G+ membrane	hypothetical protein	CBO0441	0.148769	0.251568	0.595755	-0.13445	0.394869	0.52492
CBO0442	CAL81995	7.0.0	Not classified	Not classified (included putative assignments)	metallo-beta-lactamase	CBO0442	0.183843	0.495672	0.804342	-0.123067	0.357668	0.487961
CBO0443	CAL81996	0.0.02	Unknown function	Conserved in other than E.coli	hypothetical protein	CBO0443	0.0858828	0.509947	0.810834	0.48745	0.0915056	0.162092
CBO0444	CAL81997	4.1.09	Cell envelope	G+ peptidoglycan, teichoic acid	N-acetylmuramoyl-L-alanine amidase-like protein	CBO0444	0.0868541	0.441634	0.769939	-0.456129	0.000372721	0.001151
CBO0445	CAL81998	1.5.0	Transport/binding proteins	Transport/binding proteins	amino acid ABC transporter permease	CBO0445	0.176382	0.494094	0.803426	0.804056	0.000674409	0.00197528
CBO0446	CAL81999	1.5.0	Transport/binding proteins	Transport/binding proteins	polar amino acid ABC transporter amino acid-binding protein	CBO0446	0.211914	0.357906	0.703782	1.27322	2.23e-06	1.04e-05
CBO0447	CAL82000	4.1.06	Cell envelope	G+ membrane	hypothetical protein	CBO0447	0.447717	0.0179061	0.111599	0.504966	0.00873591	0.0202142
CBO0448	CAL82001	7.0.0	Not classified	Not classified (included putative assignments)	diguanylate phosphodiesterase	CBO0448	-0.199846	0.279192	0.628472	-0.587001	0.00403325	0.0100397
CBO0449	CAL82002	3.2.14	Biosynthesis of cofactors, carriers	Thiamin	thiamine-phosphate pyrophosphorylase	thiE, CBO0449	0.091509	0.672998	0.890773	-0.113603	0.437468	0.566014
CBO0450	CAL82003	3.2.14	Biosynthesis of cofactors, carriers	Thiamin	hydroxyethylthiazole kinase	thiM, thiK, CBO0450	0.18425	0.457903	0.781641	0.266269	0.0676713	0.124979
CBO0451	CAL82004	3.2.14	Biosynthesis of cofactors, carriers	Thiamin	phosphomethylpyrimidine kinase	thiD1, CBO0451	0.0187374	0.858826	0.962195	0.378787	0.00173845	0.00468538
CBO0452	CAL82005	4.1.09	Cell envelope	G+ peptidoglycan, teichoic acid	D-alanine--D-alanine ligase	ddlB, ddl, CBO0452	-0.0300012	0.865003	0.964986	-2.19182	5.05e-07	2.69e-06
CBO0453	CAL82006	1.5.01	Transport/binding proteins	Amino acids and amines	high-affinity branched-chain amino acid ABC transporter amino acid-binding protein	CBO0453	0.427272	0.0362285	0.184329	-1.25618	7.1e-07	3.68e-06
CBO0454	CAL82007	1.5.01	Transport/binding proteins	Amino acids and amines	high-affinity branched-chain amino acid ABC transporter permease	CBO0454	0.218466	0.226219	0.565142	-0.627689	8.13e-05	0.000281869
CBO0455	CAL82008	1.5.01	Transport/binding proteins	Amino acids and amines	high-affinity branched-chain amino acid ABC transporter permease	CBO0455	-0.0976939	0.652944	0.883599	-1.20333	8.22e-06	3.41e-05
CBO0456	CAL82009	1.5.01	Transport/binding proteins	Amino acids and amines	high-affinity branched chain amino acid ABC transporter ATP-binding protein	CBO0456	-0.0485417	0.722029	0.914432	-2.6028	3.64e-12	9.37e-11
CBO0457	CAL82010	1.5.01	Transport/binding proteins	Amino acids and amines	high-affinity branched chain amino acid ABC transporter ATP-binding protein	CBO0457	-0.135568	0.380867	0.721873	-0.907164	8.62e-06	3.56e-05
CBO0458	CAL82011	0.0.02	Unknown function	Conserved in other than E.coli	hypothetical protein	CBO0458	-0.114849	0.445011	0.772547	-1.57587	1.42e-08	1.08e-07
CBO0459	CAL82012	4.1.06	Cell envelope	G+ membrane	hypothetical protein	CBO0459	-0.562214	0.000305073	0.00514018	-0.776785	7.06e-06	2.96e-05
CBO0460	CAL82013	4.1.06	Cell envelope	G+ membrane	hypothetical protein	CBO0460	-0.0321449	0.825407	0.950716	0.350585	0.0642602	0.119323
CBO0461	CAL82014	6.3.03	Regulation	GntR	GntR family transcriptional regulator	CBO0461	0.196953	0.373236	0.715944	-0.691078	9.45e-05	0.000325001
CBO0462	CAL82015	4.1.06	Cell envelope	G+ membrane	hypothetical protein	CBO0462	0.448647	0.0871703	0.33147	0.639529	0.00677695	0.0160737
CBO0463	CAL82016	4.1.06	Cell envelope	G+ membrane	hypothetical protein	CBO0463	0.477862	0.0991208	0.357698	0.165992	0.375184	0.506005
CBO0464	CAL82017	4.1.06	Cell envelope	G+ membrane	hypothetical protein	CBO0464	0.27057	0.319127	0.668414	0.826904	0.00011161	0.000378701
CBO0465	CAL82018	0.0.02	Unknown function	Conserved in other than E.coli	hydrolase, NUDIX family	CBO0465	0.244312	0.0480082	0.223588	0.176345	0.185166	0.290902
CBO0466	CAL82019	4.1.06	Cell envelope	G+ membrane	hypothetical protein	CBO0466	0.0975508	0.642247	0.878701	-0.357846	0.0996071	0.17411
CBO0467	CAL82020	4.1.06	Cell envelope	G+ membrane	hypothetical protein	CBO0467	0.129041	0.447211	0.774061	-0.217897	0.100691	0.175732
CBO0468	CAL82021	6.3.02	Regulation	AraC	AraC family transcriptional regulator	CBO0468	0.207685	0.15334	0.458506	-0.153397	0.335986	0.466015
CBO0469	CAL82022	7.0.0	Not classified	Not classified (included putative assignments)	hypothetical protein	CBO0469	-0.546611	8.59282e-05	0.00186004	-1.17599	5.56e-07	2.94e-06
CBO0470	CAL82023	4.1.06	Cell envelope	G+ membrane	hypothetical protein	CBO0470	-0.407013	0.0239484	0.139083	-0.134934	0.348552	0.478468
CBO0471	CAL82024	0.0.0	Unknown function	Unknown function, no known homologues	hypothetical protein	CBO0471	-0.014179	0.920708	0.980921	0.0544374	0.745215	0.827443
CBO0472	CAL82025	2.2.03	Macromolecule synthesis, modification	DNA - replication, repair, restriction/modification	nuclease SbcCD subunit D	sbcD, CBO0472	-0.507865	0.000217249	0.00394786	-0.627126	2.03e-05	7.83e-05
CBO0473	CAL82026	2.2.03	Macromolecule synthesis, modification	DNA - replication, repair, restriction/modification	exonuclease SbcC	sbcC, CBO0473	0.229664	0.348496	0.694639	-0.303934	0.0161148	0.0352858
CBO0474	CAL82027	3.4.05	Degradation of small molecules	Other	hydrolase, NUDIX family	CBO0474	-0.223173	0.168667	0.482249	-1.15281	1.15e-06	5.68e-06
CBO0475	CAL82028	4.1.06	Cell envelope	G+ membrane	hypothetical protein	CBO0475	0.425916	0.0140039	0.0929868	-1.64889	6.46e-08	4.18e-07
CBO0476	CAL82029	0.0.02	Unknown function	Conserved in other than E.coli	hypothetical protein	CBO0476	-0.0738702	0.660021	0.886516	-0.123672	0.463553	0.591206
CBO0477	CAL82030	6.3.13	Regulation	ArsR	transcription regulator ArsR	CBO0477	1.40001	8.49608e-05	0.00184923	4.92408	4.01e-13	1.65e-11
CBO0478	CAL82031	1.5.02	Transport/binding proteins	Cations	cadmium-translocating P-type ATPase	CBO0478	0.603876	0.0257398	0.145708	3.27983	6.59e-11	1.05e-09
CBO0479	CAL82032	5.1.02	Laterally acquired elements	Phage-related functions and prophages	putative prophage protein (partial)	CBO0479	0.123318	0.460308	0.782842	0.221538	0.131383	0.219068
CBO0480	CAL82034	0.0.02	Unknown function	Conserved in other than E.coli	hypothetical protein	CBO0480	0.140585	0.398296	0.73656	0.247123	0.180333	0.284644
CBO0481	CAL82035	0.0.02	Unknown function	Conserved in other than E.coli	hypothetical protein	CBO0481	0.105575	0.417145	0.750231	0.164751	0.273622	0.396397
CBO0482	CAL82036	0.0.02	Unknown function	Conserved in other than E.coli	hypothetical protein	CBO0482	-0.149387	0.446877	0.773652	-0.044137	0.751857	0.832534
CBO0483	CAL82037	0.0.02	Unknown function	Conserved in other than E.coli	PhoH family protein	CBO0483	0.323608	0.0151876	0.0991321	1.49665	1.94e-09	1.89e-08
CBO0484	CAL82038	4.1.07	Cell envelope	G+ exported/lipoprotein	exported protein	CBO0484	0.15323	0.238117	0.579978	-0.729703	0.00871001	0.0201632
CBO0485	CAL82039	0.0.02	Unknown function	Conserved in other than E.coli	hypothetical protein	CBO0485	0.103177	0.483252	0.798593	-0.808819	2.15e-05	8.24e-05
CBO0486	CAL82040	5.1.05	Laterally acquired elements	Pathogenicity island-related functions	hypothetical protein	SagA, CBO0486	-0.0501563	0.842374	0.955669	0.196818	0.286325	0.410897
CBO0487	CAL82041	5.1.05	Laterally acquired elements	Pathogenicity island-related functions	streptolysin associated protein SagB	SagB, CBO0487	-0.892823	5.03781e-06	0.000190986	-1.57716	3.36e-09	3.01e-08
CBO0488	CAL82042	5.1.05	Laterally acquired elements	Pathogenicity island-related functions	streptolysin associated protein SagC	sagC, CBO0488	-0.427434	0.024045	0.139321	-1.72289	2.85e-06	1.3e-05
CBO0489	CAL82043	5.1.05	Laterally acquired elements	Pathogenicity island-related functions	streptolysin associated protein SagD	sagD, CBO0489	-0.236695	0.167668	0.481144	-2.26127	2.94e-11	5.37e-10
CBO0490	CAL82044	5.1.05	Laterally acquired elements	Pathogenicity island-related functions	CAAX amino terminal protease	sagE, CBO0490	0.119363	0.50128	0.807102	-0.449056	0.00394634	0.00983585
CBO0491	CAL82045	5.1.05	Laterally acquired elements	Pathogenicity island-related functions	hypothetical protein	sagF, CBO0491	-0.137709	0.387856	0.726754	-0.697769	0.000815967	0.00234922
CBO0492	CAL82046	5.1.05	Laterally acquired elements	Pathogenicity island-related functions	ABC transporter ATP-binding protein	sagG, CBO0492	-0.148367	0.477311	0.795207	-2.49773	2.13e-10	2.8e-09
CBO0493	CAL82047	5.1.05	Laterally acquired elements	Pathogenicity island-related functions	ABC transporter permease/ATP-binding protein	sagH, CBO0493	0.395557	0.0249706	0.143165	-0.66771	0.000602163	0.00178293
CBO0494	CAL82048	5.1.05	Laterally acquired elements	Pathogenicity island-related functions	drug ABC transporter ATP-binding/permease	sagI, CBO0494	0.416708	0.0544511	0.243506	-0.450312	0.00153357	0.00417613
CBO0495	CAL82049	2.1.04	Macromolecule degradation	Degradation of proteins, peptides, glycoproteins	metalloprotease	CBO0495	0.355846	0.199035	0.527753	-0.665258	0.00244786	0.00639369
CBO0496	CAL82050	0.0.0	Unknown function	Unknown function, no known homologues	hypothetical protein	CBO0496	1.12982	3.39149e-05	0.000895501	2.02835	9.38e-09	7.49e-08
CBO0497	CAL82051	1.4.02	Protection responses	Detoxification	arsenical pump family protein	CBO0497	-0.216686	0.226981	0.566221	-0.994129	1.55e-05	6.1e-05
CBO0498	CAL82052	4.1.06	Cell envelope	G+ membrane	hypothetical protein	CBO0498	0.107846	0.59551	0.85746	0.364149	0.027932	0.0575573
CBO0499	CAL82053	2.2.11	Macromolecule synthesis, modification	RNA synthesis, modification, DNA transcription	tRNA (guanine-N(7)-)-methyltransferase	CBO0499	-0.492265	0.00953104	0.0702858	-1.73756	3.63e-08	2.49e-07
CBO0500	CAL82054	0.0.02	Unknown function	Conserved in other than E.coli	hypothetical protein	CBO0500	-0.695101	2.85055e-05	0.000772102	-1.0512	2.24e-06	1.04e-05
CBO0501	CAL82055	1.4.02	Protection responses	Detoxification	thiol peroxidase	tpx, CBO0501	0.768183	0.00165062	0.0186206	3.09065	1.92e-13	9.11e-12
CBO0502	CAL82056	3.6.01	Fatty acid biosynthesis	Fatty acid and phosphatidic acid biosynthesis	3-ketoacyl-ACP reductase	fabG, CBO0502	-0.499486	0.00212605	0.0224548	-0.814276	0.000479474	0.00144771
CBO0503	CAL82057	6.1.02	Regulation	Response regulator	response regulator	CBO0503	-0.0353073	0.828197	0.951518	0.28214	0.0988354	0.173069
CBO0504	CAL82058	4.1.09	Cell envelope	G+ peptidoglycan, teichoic acid	peptidoglycan hydrolase	CBO0504	0.0484819	0.739464	0.920644	-0.728544	0.00230686	0.00606466
CBO0505	CAL82059	0.0.02	Unknown function	Conserved in other than E.coli	hydrolase, alpha/beta fold family	CBO0505	-0.781567	0.000387256	0.00616204	-1.24643	3.2e-07	1.77e-06
CBO0506	CAL82060	6.1.02	Regulation	Response regulator	response regulator	CBO0506	-0.690676	0.000527884	0.00785934	-0.812259	0.000100748	0.000344819
CBO0507	CAL82061	7.0.0	Not classified	Not classified (included putative assignments)	HDIG domain protein	CBO0507	0.43417	0.0879937	0.333155	0.29597	0.185532	0.29136
CBO0508	CAL82062	1.1.01	Cell processes	Chemotaxis and mobility	methyl-accepting chemotaxis protein	CBO0508	0.511815	0.00306944	0.0296342	0.452626	0.00737831	0.0173509
CBO0509	CAL82063	6.1.02	Regulation	Response regulator	response regulator	CBO0509	-0.844876	1.04632e-05	0.000338806	-1.6892	3.71e-08	2.54e-07
CBO0510	CAL82064	2.2.01	Macromolecule synthesis, modification	Amino acyl tRNA synthesis; tRNA modification	seryl-tRNA synthetase	serS, CBO0510	-0.0901649	0.570739	0.844428	-0.87507	2.18e-05	8.33e-05
CBO0511	CAL82065	2.2.03	Macromolecule synthesis, modification	DNA - replication, repair, restriction/modification	ATP-dependent helicase	CBO0511	0.146447	0.319998	0.668888	0.197924	0.140111	0.231125
CBO0512	CAL82066	0.0.02	Unknown function	Conserved in other than E.coli	hypothetical protein	CBO0512	0.621176	0.00140159	0.0163505	0.180711	0.301679	0.428747
CBO0513	CAL82067	6.3.03	Regulation	GntR	GntR family transcriptional regulator	CBO0513	-0.520459	0.00653393	0.0528932	-0.414653	0.011438	0.0258584
CBO0515	CAL82068	3.3.15	Central intermediary metabolism	Pool, multipurpose conversions of intermediate metabolism	N(5)-(carboxyethyl)ornithine synthase	ceo, CBO0515	-1.26015	5.50312e-07	3.52043e-05	0.86804	6.57e-05	0.000231726
CBO0516	CAL82069	3.3.04	Central intermediary metabolism	Gluconeogenesis	fructose-1,6-bisphosphatase	fbp, CBO0516	-0.560331	0.00164697	0.0186062	-0.947941	5.99e-06	2.56e-05
CBO0517	CAL82070	0.0.0	Unknown function	Unknown function, no known homologues	hypothetical protein	CBO0517	-0.170396	0.274124	0.622832	-0.450076	0.00521074	0.0126409
CBO0518	CAL82071	7.0.0	Not classified	Not classified (included putative assignments)	hemerythrin-like metal-binding domain-containing protein	CBO0518	0.232401	0.352738	0.698594	1.73656	9.44e-07	4.76e-06
CBO0519	CAL82072	0.0.0	Unknown function	Unknown function, no known homologues	hypothetical protein	CBO0519	-0.142656	0.411558	0.746433	-0.102795	0.523204	0.645474
CBO0520	CAL82073	0.0.02	Unknown function	Conserved in other than E.coli	hypothetical protein	CBO0520	-0.0297753	0.79672	0.942491	0.121446	0.30004	0.426958
CBO0521	CAL82074	1.4.02	Protection responses	Detoxification	superoxide dismutase, Mn/Fe family	CBO0521	0.256356	0.151893	0.456093	-0.0961043	0.68692	0.783962
CBO0522	CAL82075	7.0.0	Not classified	Not classified (included putative assignments)	metallo-beta-lactamase	CBO0522	0.131183	0.490466	0.801181	0.333495	0.0147675	0.0325621
CBO0523	CAL82076	4.1.07	Cell envelope	G+ exported/lipoprotein	hypothetical protein	CBO0523	0.275053	0.101354	0.362833	1.33792	8.86e-08	5.55e-07
CBO0524	CAL82077	4.1.06	Cell envelope	G+ membrane	hypothetical protein	CBO0524	0.0781346	0.662826	0.887607	0.0519205	0.816135	0.879031
CBO0525	CAL82078	4.1.06	Cell envelope	G+ membrane	hypothetical protein	CBO0525	0.116097	0.376888	0.719639	-0.0799908	0.578553	0.694697
CBO0526	CAL82079	6.3.01	Regulation	AsnC	transcription regulator AsnC	CBO0526	-0.987829	0.00216875	0.0228072	1.87274	8.09e-11	1.25e-09
CBO0527	CAL82080	4.1.06	Cell envelope	G+ membrane	hypothetical protein	CBO0527	0.155414	0.290703	0.639115	-0.644675	0.00429779	0.0106193
CBO0528	CAL82081	1.5.01	Transport/binding proteins	Amino acids and amines	amino acid permease	CBO0528	0.102961	0.56913	0.843647	0.771047	0.000489969	0.00147544
CBO0529	CAL82082	1.5.01	Transport/binding proteins	Amino acids and amines	amino acid permease	CBO0529	-0.195415	0.364206	0.709442	-0.0919916	0.666562	0.76752
CBO0530	CAL82083	7.0.0	Not classified	Not classified (included putative assignments)	transferase, hexapeptide repeat family	CBO0530	-0.744195	0.000151948	0.00295576	-0.472724	0.000296111	0.000930678
CBO0531	CAL82084	7.0.0	Not classified	Not classified (included putative assignments)	metallo beta-lactamase superfamily hydrolase	CBO0531	-0.110333	0.579132	0.849765	0.296816	0.0439582	0.085849
CBO0532	CAL82085	1.5.02	Transport/binding proteins	Cations	calcium-translocating P-type ATPase	CBO0532	0.662175	0.00578419	0.0479083	0.600223	0.0109827	0.0249041
CBO0533	CAL82086	1.5.04	Transport/binding proteins	Anions	chromate transporter	CBO0533	0.0579453	0.66449	0.887773	0.851819	4.6e-05	0.000166979
CBO0534	CAL82087	1.5.04	Transport/binding proteins	Anions	chromate transporter	CBO0534	0.228256	0.131337	0.421685	1.6139	3.07e-09	2.8e-08
CBO0535	CAL82088	7.0.0	Not classified	Not classified (included putative assignments)	PemK family protein	CBO0535	-1.97088	4.1767e-08	4.98265e-06	-1.55289	1.36e-06	6.6e-06
CBO0536	CAL82089	0.0.02	Unknown function	Conserved in other than E.coli	hypothetical protein	CBO0536	0.136582	0.432953	0.763527	0.956376	8.5e-07	4.34e-06
CBO0537	CAL82090	3.2.11	Biosynthesis of cofactors, carriers	Pyridine nucleotide	NAD synthetase	nadE, CBO0537	-0.639617	0.0149633	0.0979505	-1.93031	1.52e-07	9.05e-07
CBO0538	CAL82091	4.1.06	Cell envelope	G+ membrane	hypothetical protein	CBO0538	0.244578	0.0858791	0.328507	0.890619	4.19e-07	2.27e-06
CBO0539	CAL82092	4.1.06	Cell envelope	G+ membrane	hypothetical protein	CBO0539	0.372985	0.059785	0.258643	0.352126	0.042353	0.0830438
CBO0540	CAL82093	0.0.0	Unknown function	Unknown function, no known homologues	hypothetical protein	CBO0540	0.168041	0.251849	0.595903	-0.0789949	0.556525	0.675211
CBO0541	CAL82094	4.1.06	Cell envelope	G+ membrane	CAAX amino terminal protease	CBO0541	0.15982	0.215943	0.550866	1.26833	4.38e-09	3.84e-08
CBO0542	CAL82095	2.1.04	Macromolecule degradation	Degradation of proteins, peptides, glycoproteins	xaa-pro aminopeptidase	pepP, CBO0542	-0.196363	0.584379	0.851903	0.378103	0.0141479	0.03131
CBO0543	CAL82096	4.1.06	Cell envelope	G+ membrane	hypothetical protein	CBO0543	-0.261311	0.432692	0.763285	0.160813	0.322093	0.450598
CBO0543A	CAL82097	6.5.0	Regulation	Others	DNA-binding protein	CBO0543A	0.126384	0.455594	0.779591	0.13881	0.219843	0.333623
CBO0544	CAL82098	7.0.0	Not classified	Not classified (included putative assignments)	GNAT family acetyltransferase	CBO0544	-0.101742	0.444599	0.772155	-0.160934	0.412351	0.541625
CBO0545	CAL82099	7.0.0	Not classified	Not classified (included putative assignments)	(2Fe-2S)-binding protein	CBO0545	0.424097	0.0465585	0.218649	0.531999	0.00272819	0.00706144
CBO0546	CAL82100	0.0.0	Unknown function	Unknown function, no known homologues	hypothetical protein	CBO0546	-0.19735	0.419146	0.751682	0.0567704	0.684573	0.782306
CBO0547	CAL82101	0.0.0	Unknown function	Unknown function, no known homologues	hypothetical protein	CBO0547	-0.18215	0.199147	0.527821	-0.0972029	0.39408	0.524318
CBO0548	CAL82102	4.1.07	Cell envelope	G+ exported/lipoprotein	exported protein	CBO0548	0.195085	0.216648	0.551949	-0.302864	0.0920452	0.162919
CBO0549	CAL82103	5.1.02	Laterally acquired elements	Phage-related functions and prophages	hypothetical protein	CBO0549	0.217404	0.137797	0.432617	1.07559	3.28e-07	1.81e-06
CBO0550	CAL82104	1.6.01	Adaptation	Adaptations, atypical conditions	carbon starvation protein CstA	cstA, CBO0550	0.173231	0.271791	0.619933	1.38475	2.73e-08	1.93e-07
CBO0551	CAL82105	4.1.06	Cell envelope	G+ membrane	hypothetical protein	CBO0551	-0.301675	0.0261586	0.146976	-0.0808805	0.528151	0.649794
CBO0552	CAL82106	1.1.01	Cell processes	Chemotaxis and mobility	methyl-accepting chemotaxis protein	CBO0552	-0.13845	0.370411	0.71388	-0.183405	0.360803	0.491258
CBO0553	CAL82107	1.5.05	Transport/binding proteins	Other	putative antibiotic resistance ABC transporter (pseudogene)	CBO0553	0.349348	0.0691838	0.285853	0.33546	0.0696862	0.127979
CBO0555	CAL82108	1.6.02	Adaptation	Osmotic adaptation	large conductance mechanosensitive channel protein	mscL, CBO0555	-0.196932	0.115481	0.391681	-0.938522	1.62e-05	6.35e-05
CBO0556	CAL82109	4.1.06	Cell envelope	G+ membrane	proton-coupled thiamine transporter YuaJ	CBO0556	0.457387	0.0349884	0.180115	2.5034	1.56e-10	2.15e-09
CBO0557	CAL82110	4.1.06	Cell envelope	G+ membrane	hypothetical protein	CBO0557	-0.142767	0.44156	0.769939	-0.115966	0.530794	0.652382
CBO0558	CAL82111	0.0.02	Unknown function	Conserved in other than E.coli	SEC-C motif domain protein	CBO0558	-0.640446	0.000138725	0.00274606	-0.951095	1.96e-05	7.58e-05
CBO0558A	CAL82112	6.3.03	Regulation	GntR	GntR family transcriptional regulator	CBO0558A	3.08595	4.77379e-08	5.40468e-06	5.13963	1.07e-11	2.28e-10
CBO0559	CAL82113	1.5.0	Transport/binding proteins	Transport/binding proteins	ABC transporter ATP-binding protein	CBO0559	2.95211	3.60186e-10	1.77133e-07	4.61234	7.49e-14	4.46e-12
CBO0560	CAL82114	4.1.06	Cell envelope	G+ membrane	ABC transporter permease	CBO0560	2.70007	2.58246e-07	2.01198e-05	4.88225	7.46e-13	2.65e-11
CBO0561	CAL82115	1.5.01	Transport/binding proteins	Amino acids and amines	spermidine/putrescine ABC transporter ATP-binding protein	potA, CBO0561	-0.731374	0.0015051	0.017372	-0.637806	0.00439663	0.0108414
CBO0562	CAL82116	1.5.01	Transport/binding proteins	Amino acids and amines	spermidine/putrescine ABC transporter permease	potB, CBO0562	-0.47821	0.00297744	0.0290129	-1.08827	4.51e-06	1.97e-05
CBO0563	CAL82117	1.5.01	Transport/binding proteins	Amino acids and amines	spermidine/putrescine ABC transporter permease	potCD, CBO0563	0.162246	0.396407	0.735087	-0.767402	0.00186653	0.0049972
CBO0564	CAL82118	6.3.02	Regulation	AraC	AraC family transcriptional regulator	CBO0564	-0.0152665	0.90973	0.97819	0.426887	0.0261586	0.0543478
CBO0565	CAL82119	1.5.0	Transport/binding proteins	Transport/binding proteins	Sodium:dicarboxylate symporter	CBO0565	0.067763	0.727878	0.916076	3.5725	1.2e-12	3.84e-11
CBO0566	CAL82120	4.1.06	Cell envelope	G+ membrane	hypothetical protein	CBO0566	0.107273	0.495244	0.804342	0.282782	0.0825885	0.148282
CBO0567	CAL82121	7.0.0	Not classified	Not classified (included putative assignments)	metal-dependent phosphohydrolase	CBO0567	-0.170382	0.189484	0.514121	0.362964	0.00923014	0.0212641
CBO0568	CAL82122	0.0.0	Unknown function	Unknown function, no known homologues	hypothetical protein	CBO0568	0.0963345	0.397024	0.735484	0.474426	0.00220884	0.00582642
CBO0569	CAL82123	0.0.0	Unknown function	Unknown function, no known homologues	hypothetical protein	CBO0569	-0.265385	0.0710874	0.291177	-0.210206	0.143555	0.235866
CBO0570	CAL82124	2.1.04	Macromolecule degradation	Degradation of proteins, peptides, glycoproteins	CAAX amino terminal protease	CBO0570	-0.242141	0.131569	0.42207	0.547639	0.00261115	0.0067909
CBO0571	CAL82125	0.0.02	Unknown function	Conserved in other than E.coli	pentapeptide repeat-containing protein	CBO0571	-0.0609255	0.79517	0.942005	0.202581	0.392311	0.522969
CBO0573	CAL82126	7.0.0	Not classified	Not classified (included putative assignments)	tRNA-binding protein	CBO0573	0.625905	0.0280449	0.1541	2.24676	6.61e-08	4.25e-07
CBO0574	CAL82127	2.2.10	Macromolecule synthesis, modification	Proteins - translation and modification	signal peptidase I	CBO0574	0.582063	0.0065926	0.053204	1.74048	5.62e-08	3.67e-07
CBO0575	CAL82128	6.1.02	Regulation	Response regulator	DNA-binding response regulator, LytTr family	CBO0575	-0.70868	3.65634e-05	0.000954226	-1.94551	8.6e-12	1.91e-10
CBO0576	CAL82129	0.0.0	Unknown function	Unknown function, no known homologues	hypothetical protein	CBO0576	0.161009	0.22382	0.562121	1.43532	9.05e-07	4.59e-06
CBO0577	CAL82130	0.0.0	Unknown function	Unknown function, no known homologues	hypothetical protein	CBO0577	0.176852	0.339655	0.685285	0.34625	0.126725	0.2127
CBO0578	CAL82131	0.0.0	Unknown function	Unknown function, no known homologues	hypothetical protein	CBO0578	0.430105	0.00828903	0.0635075	0.56617	0.00112851	0.00316346
CBO0579	CAL82132	4.1.06	Cell envelope	G+ membrane	hypothetical protein	CBO0579	0.0800026	0.55114	0.835413	0.262464	0.218761	0.332301
CBO0580	CAL82133	3.3.19	Central intermediary metabolism	Sulfur metabolism	radical SAM domain protein	CBO0580	0.493507	0.00116951	0.0142782	-0.321883	0.147313	0.241009
CBO0581	CAL82134	0.0.02	Unknown function	Conserved in other than E.coli	hypothetical protein	CBO0581	0.324894	0.0510084	0.232605	-0.496501	0.00307009	0.00785593
CBO0582	CAL82135	0.0.02	Unknown function	Conserved in other than E.coli	hypothetical protein	CBO0582	0.387583	0.011774	0.0823496	-0.488573	0.00440749	0.0108645
CBO0583	CAL82136	1.5.0	Transport/binding proteins	Transport/binding proteins	ABC transporter permease/ATP-binding protein	CBO0583	0.185413	0.122944	0.406293	0.227883	0.172038	0.273941
CBO0584	CAL82137	4.1.07	Cell envelope	G+ exported/lipoprotein	lipoprotein	CBO0584	0.256464	0.175519	0.49379	0.114618	0.536845	0.65797
CBO0585	CAL82138	7.0.0	Not classified	Not classified (included putative assignments)	GNAT family acetyltransferase	CBO0585	0.0964085	0.535845	0.825645	0.365894	0.0158403	0.0347476
CBO0586	CAL82139	1.5.0	Transport/binding proteins	Transport/binding proteins	ABC transporter permease	CBO0586	0.0910681	0.63319	0.874361	0.370305	0.0293287	0.0599956
CBO0587	CAL82140	1.5.0	Transport/binding proteins	Transport/binding proteins	ABC transporter ATP-binding protein	CBO0587	-0.264633	0.0870707	0.331323	-0.213878	0.161078	0.259385
CBO0588	CAL82141	0.0.02	Unknown function	Conserved in other than E.coli	hypothetical protein	CBO0588	-0.323559	0.102155	0.364407	-0.19444	0.314913	0.442442
CBO0589	CAL82142	0.0.02	Unknown function	Conserved in other than E.coli	hypothetical protein	CBO0589	-0.151506	0.303623	0.653462	0.0388948	0.82375	0.884164
CBO0590	CAL82143	0.0.02	Unknown function	Conserved in other than E.coli	degV family protein	CBO0590	-0.919984	9.6089e-05	0.00202701	-0.507977	0.00271826	0.00703999
CBO0591	CAL82144	4.1.06	Cell envelope	G+ membrane	hypothetical protein	CBO0591	-1.09037	1.71692e-08	2.64894e-06	-1.4429	1.78e-10	2.42e-09
CBO0592	CAL82145	4.1.06	Cell envelope	G+ membrane	hypothetical protein	CBO0592	0.0810451	0.529801	0.822695	0.190383	0.137957	0.228049
CBO0593	CAL82146	3.3.19	Central intermediary metabolism	Sulfur metabolism	sulfatase	CBO0593	-0.380407	0.0200416	0.121915	-0.335192	0.0374671	0.0744939
CBO0594	CAL82147	6.5.0	Regulation	Others	sigma-54 dependent transcriptional regulator	CBO0594	-0.437756	0.132414	0.423277	0.861076	7.31e-05	0.000255676
CBO0595	CAL82148	1.5.05	Transport/binding proteins	Other	nucleoside transporter NupC family	CBO0595	-0.0417138	0.756257	0.926309	-0.262806	0.0619705	0.115586
CBO0596	CAL82149	4.1.06	Cell envelope	G+ membrane	hypothetical protein	CBO0596	0.125986	0.561172	0.840743	-0.0859452	0.592503	0.706862
CBO0597	CAL82150	2.2.01	Macromolecule synthesis, modification	Amino acyl tRNA synthesis; tRNA modification	asparaginyl-tRNA synthetase	asnC, tss, CBO0597	-0.277212	0.0709671	0.290836	-1.95222	2.27e-09	2.15e-08
CBO0598	CAL82151	6.3.14	Regulation	PadR	PadR family transcriptional regulator	CBO0598	0.165008	0.206392	0.537035	2.6444	4.87e-14	3.18e-12
CBO0599	CAL82152	4.1.06	Cell envelope	G+ membrane	hypothetical protein	CBO0599	0.13756	0.356879	0.70264	1.18179	1.43e-07	8.54e-07
CBO0600	CAL82153	6.5.0	Regulation	Others	LytR family transcriptional regulator	CBO0600	0.0837494	0.552422	0.835912	0.606954	0.00267855	0.00694553
CBO0601	CAL82154	4.1.06	Cell envelope	G+ membrane	hypothetical protein	CBO0601	0.117128	0.426276	0.758087	0.544891	0.00127145	0.00352517
CBO0602	CAL82155	6.3.02	Regulation	AraC	AraC family transcriptional regulator	CBO0602	0.0427697	0.770195	0.931277	0.381928	0.0683356	0.125984
CBO0603	CAL82156	2.1.04	Macromolecule degradation	Degradation of proteins, peptides, glycoproteins	CAAX amino terminal protease	CBO0603	0.01872	0.862426	0.963876	0.137713	0.364966	0.495341
CBO0604	CAL82157	6.5.0	Regulation	Others	DNA-binding protein	CBO0604	-0.0841695	0.61917	0.868051	-0.144838	0.395455	0.525348
CBO0605	CAL82158	4.1.07	Cell envelope	G+ exported/lipoprotein	lipoprotein	CBO0605	-0.123175	0.508995	0.810482	0.285612	0.135158	0.224128
CBO0606	CAL82159	4.1.07	Cell envelope	G+ exported/lipoprotein	lipoprotein	CBO0606	0.0432239	0.843992	0.95652	-0.183914	0.223462	0.338072
CBO0607	CAL82160	6.1.02	Regulation	Response regulator	DNA-binding response regulator	CBO0607	-0.417214	0.0218568	0.130077	-0.651974	5.18e-05	0.000186449
CBO0608	CAL82161	6.1.01	Regulation	Sensor kinase	sensor histidine kinase	CBO0608	-0.125824	0.377912	0.720209	-0.419127	0.00727485	0.0171409
CBO0609	CAL82162	4.1.09	Cell envelope	G+ peptidoglycan, teichoic acid	D-alanyl-D-alanine carboxypeptidase	CBO0609	-0.581273	0.00202174	0.0215557	-0.413458	0.0180482	0.0389983
CBO0610	CAL82163	6.1.02	Regulation	Response regulator	DNA-binding response regulator	CBO0610	-0.444184	0.00721398	0.0571634	-0.543352	0.00243163	0.00635446
CBO0611	CAL82164	6.1.01	Regulation	Sensor kinase	sensor histidine kinase	CBO0611	-0.177292	0.272099	0.620139	-1.08541	1.38e-06	6.72e-06
CBO0612	CAL82165	4.1.06	Cell envelope	G+ membrane	hypothetical protein	CBO0612	1.79694	7.42992e-06	0.000256977	5.23594	3.04e-13	1.33e-11
CBO0613	CAL82166	6.1.02	Regulation	Response regulator	response regulator	CBO0613	-0.0512131	0.696995	0.902469	0.195599	0.25603	0.376696
CBO0614	CAL82167	6.1.01	Regulation	Sensor kinase	sensor histidine kinase	CBO0614	-0.298862	0.0770063	0.307108	-0.338285	0.027111	0.0560425
CBO0615	CAL82168	1.8.01	Differentiation/sporulation/Germination	Differentiation/sporulation/Germination	rod shape-determining protein RodA	CBO0615	0.41236	0.0370196	0.186903	0.967023	4.3e-06	1.89e-05
CBO0616	CAL82169	3.6.01	Fatty acid biosynthesis	Fatty acid and phosphatidic acid biosynthesis	cyclopropane-fatty-acyl-phospholipid synthase	CBO0616	-0.114401	0.339213	0.685175	-0.185681	0.359882	0.490342
CBO0617	CAL82170	6.3.13	Regulation	ArsR	hypothetical protein	CBO0617	-0.0282281	0.863457	0.964453	1.14092	1.09e-06	5.4e-06
CBO0618	CAL82171	1.5.0	Transport/binding proteins	Transport/binding proteins	ABC transporter permease/ATP-binding protein	CBO0618	0.0189103	0.939364	0.985697	0.895153	0.000336818	0.0010465
CBO0619	CAL82172	1.4.0	Protection responses	Protection responses	chloramphenicol acetyltransferase	cat, CBO0619	-0.375253	0.0538031	0.241485	0.0909108	0.479462	0.605915
CBO0620	CAL82173	6.3.08	Regulation	TetR	TetR family transcriptional regulator	CBO0620	-0.358258	0.040526	0.197877	-0.302099	0.0793509	0.143188
CBO0621	CAL82174	7.0.0	Not classified	Not classified (included putative assignments)	GNAT family acetyltransferase	CBO0621	0.11776	0.373754	0.716709	0.102285	0.42473	0.553493
CBO0622	CAL82175	7.0.0	Not classified	Not classified (included putative assignments)	chaperone CsaA	csaA, CBO0622	0.207339	0.16008	0.469745	0.550986	0.00196369	0.00522709
CBO0623	CAL82176	6.3.02	Regulation	AraC	AraC family transcriptional regulator	CBO0623	0.419477	0.00528327	0.0446285	2.18055	1.31e-12	4.12e-11
CBO0624	CAL82177	7.0.0	Not classified	Not classified (included putative assignments)	DNA-binding protein	CBO0624	0.0389914	0.797398	0.942595	0.498194	0.0312824	0.063546
CBO0625	CAL82178	0.0.02	Unknown function	Conserved in other than E.coli	hypothetical protein	CBO0625	0.260739	0.208331	0.53976	2.23568	7.39e-11	1.15e-09
CBO0626	CAL82179	1.5.0	Transport/binding proteins	Transport/binding proteins	ABC transporter	CBO0626	-0.0958803	0.565868	0.842702	0.386692	0.0172496	0.037489
CBO0627	CAL82180	1.5.0	Transport/binding proteins	Transport/binding proteins	ABC transporter ATP-binding protein	CBO0627	0.332236	0.132142	0.423011	0.322005	0.00614684	0.014701
CBO0628	CAL82181	4.1.06	Cell envelope	G+ membrane	hypothetical protein	CBO0628	0.189457	0.172771	0.489705	0.319854	0.0280954	0.0578259
CBO0629	CAL82182	2.1.04	Macromolecule degradation	Degradation of proteins, peptides, glycoproteins	allantoate amidohydrolase	CBO0629	-0.487028	0.00312823	0.0300359	-0.199063	0.13838	0.2287
CBO0630	CAL82183	2.2.03	Macromolecule synthesis, modification	DNA - replication, repair, restriction/modification	MutS domain-containing protein	CBO0630	0.230707	0.153168	0.458409	0.16922	0.394968	0.524923
CBO0631	CAL82184	0.0.0	Unknown function	Unknown function, no known homologues	hypothetical protein	CBO0631	0.201785	0.207806	0.539021	0.536015	0.00136998	0.00376584
CBO0632	CAL82185	0.0.02	Unknown function	Conserved in other than E.coli	hypothetical protein	CBO0632	0.36065	0.00602403	0.0495253	0.186551	0.126228	0.212023
CBO0633	CAL82186	5.1.03	Laterally acquired elements	Plasmid-related functions	nimA protein	CBO0633	0.198973	0.169259	0.483153	0.56868	0.000638929	0.00188152
CBO0634	CAL82187	4.1.06	Cell envelope	G+ membrane	hypothetical protein	CBO0634	0.117068	0.480854	0.797235	0.139181	0.351492	0.481665
CBO0636	CAL82188	4.1.06	Cell envelope	G+ membrane	hypothetical protein	CBO0636	-0.0448428	0.761686	0.928351	0.744035	0.000941711	0.00268521
CBO0637	CAL82189	0.0.0	Unknown function	Unknown function, no known homologues	hypothetical protein	CBO0637	-0.177128	0.203389	0.533277	0.190865	0.118449	0.201017
CBO0638	CAL82190	5.1.03	Laterally acquired elements	Plasmid-related functions	pyridoxamine 5'-phosphate oxidase	CBO0638	-0.0697114	0.577425	0.849565	0.648578	0.0116361	0.0262712
CBO0639	CAL82191	2.2.03	Macromolecule synthesis, modification	DNA - replication, repair, restriction/modification	DNA repair protein	CBO0639	-0.325859	0.0252773	0.144388	-0.944968	5.02e-06	2.18e-05
CBO0640	CAL82192	6.3.03	Regulation	GntR	GntR family transcriptional regulator	CBO0640	-0.34014	0.0125005	0.0858573	-0.589129	0.000307354	0.000962552
CBO0641	CAL82193	0.0.02	Unknown function	Conserved in other than E.coli	hypothetical protein	CBO0641	-0.237266	0.0850298	0.326528	0.332468	0.119317	0.202295
CBO0642	CAL82194	0.0.0	Unknown function	Unknown function, no known homologues	hypothetical protein	CBO0642	0.121574	0.394544	0.732965	-0.166728	0.32984	0.459476
CBO0643	CAL82195	2.2.11	Macromolecule synthesis, modification	RNA synthesis, modification, DNA transcription	ATP-dependent RNA helicase RhlE	rhlE, CBO0643	0.730703	0.000385119	0.00613617	0.326048	0.0391884	0.0774467
CBO0644	CAL82196	0.0.02	Unknown function	Conserved in other than E.coli	rubrerythrin	CBO0644	-0.164945	0.476413	0.794965	0.547928	0.000414391	0.00126651
CBO0645	CAL82197	6.3.07	Regulation	MarR	MarR family transcriptional regulator	CBO0645	-0.49278	0.013998	0.0929868	-0.615623	0.000508627	0.00152782
CBO0646	CAL82198	1.4.03	Protection responses	Drug/analogue sensitivity	EmrB/QacA family drug resistance transporter	CBO0646	0.108758	0.433743	0.763948	-0.69489	3.71e-05	0.000136508
CBO0647	CAL82199	0.0.02	Unknown function	Conserved in other than E.coli	hypothetical protein	CBO0647	-0.315353	0.0622933	0.265667	-1.69136	2.11e-09	2.03e-08
CBO0648	CAL82200	6.3.06	Regulation	LysR	LysR family transcriptional regulator	CBO0648	-0.352463	0.0197071	0.120159	-0.280397	0.0570184	0.107641
CBO0649	CAL82201	0.0.02	Unknown function	Conserved in other than E.coli	hypothetical protein	CBO0649	-0.422557	0.0157698	0.101834	-0.297108	0.232492	0.349348
CBO0650	CAL82202	0.0.0	Unknown function	Unknown function, no known homologues	hypothetical protein	CBO0650	-0.0840359	0.538377	0.82771	-0.655228	0.0234389	0.0492007
CBO0651	CAL82203	4.1.07	Cell envelope	G+ exported/lipoprotein	exported protein	CBO0651	0.0413272	0.69309	0.900079	-0.182469	0.435039	0.563613
CBO0652	CAL82204	2.2.03	Macromolecule synthesis, modification	DNA - replication, repair, restriction/modification	helicase	CBO0652	-0.275314	0.026479	0.148263	0.726889	9.74e-05	0.000334173
CBO0653	CAL82205	2.2.03	Macromolecule synthesis, modification	DNA - replication, repair, restriction/modification	mutator protein	mutT1, CBO0653	-0.782084	0.00390672	0.0357859	-1.35535	4.5e-07	2.43e-06
CBO0654	CAL82206	6.5.0	Regulation	Others	BglG family transcriptional antiterminator	CBO0654	0.0814295	0.665278	0.888222	-0.0834436	0.599026	0.71249
CBO0655	CAL82207	1.5.03	Transport/binding proteins	Carbohydrates, organic acids and alcohols	PTS system beta-glucoside-specific transporter subunit IIABC	CBO0655	0.115138	0.508529	0.810074	0.260193	0.0989921	0.173285
CBO0656	CAL82208	7.0.0	Not classified	Not classified (included putative assignments)	PHP domain-containing protein	CBO0656	0.244519	0.121064	0.402532	-0.224734	0.152187	0.247772
CBO0657	CAL82209	6.5.0	Regulation	Others	CRP family transcriptional regulator	CBO0657	-0.458525	0.00627325	0.0512843	-0.826255	2.47e-05	9.38e-05
CBO0658	CAL82210	1.4.02	Protection responses	Detoxification	metallo-beta-lactamase	norV, flrD, CBO0658	-0.126995	0.369614	0.71352	-0.241221	0.120121	0.20346
CBO0659	CAL82211	0.0.02	Unknown function	Conserved in other than E.coli	scdA protein	CBO0659	-0.0854395	0.601212	0.860326	-0.0985462	0.454196	0.581632
CBO0660	CAL82212	0.0.02	Unknown function	Conserved in other than E.coli	hypothetical protein	CBO0660	-0.0952648	0.487008	0.799337	-0.153665	0.267093	0.389272
CBO0661	CAL82213	4.1.06	Cell envelope	G+ membrane	hypothetical protein	CBO0661	-0.21267	0.306631	0.655988	-2.92709	1.01e-11	2.19e-10
CBO0662	CAL82214	1.5.01	Transport/binding proteins	Amino acids and amines	sodium/glutamate symport carrier protein	gltS, gltC, CBO0662	-0.0211674	0.891039	0.972824	-0.908235	3.71e-06	1.65e-05
CBO0663	CAL82215	0.0.02	Unknown function	Conserved in other than E.coli	hypothetical protein	CBO0663	-0.157629	0.300425	0.650226	-0.12437	0.411375	0.540763
CBO0664	CAL82216	0.0.02	Unknown function	Conserved in other than E.coli	hypothetical protein	CBO0664	0.0503835	0.700052	0.90366	-0.431044	0.0130443	0.0291092
CBO0665	CAL82217	4.1.07	Cell envelope	G+ exported/lipoprotein	exported protein	CBO0665	-0.11198	0.554175	0.8361	0.568311	0.000907305	0.00259626
CBO0666	CAL82218	7.0.0	Not classified	Not classified (included putative assignments)	metallo-beta-lactamase superfamily protein	CBO0666	-0.639444	0.000141009	0.00278137	0.414365	0.028966	0.0593152
CBO0667	CAL82219	0.0.0	Unknown function	Unknown function, no known homologues	hypothetical protein	CBO0667	-0.11106	0.477614	0.795207	0.128381	0.412763	0.542072
CBO0668	CAL82220	1.5.01	Transport/binding proteins	Amino acids and amines	ABC transporter permease	CBO0668	-0.09137	0.486916	0.799278	0.175386	0.189495	0.296489
CBO0669	CAL82221	1.5.0	Transport/binding proteins	Transport/binding proteins	ABC transporter ATP-binding protein	CBO0669	-0.195508	0.145859	0.445791	-0.16891	0.205733	0.317352
CBO0670	CAL82222	4.1.07	Cell envelope	G+ exported/lipoprotein	ABC transporter substrate-binding protein	CBO0670	0.0915331	0.537606	0.826929	0.272491	0.0731753	0.133576
CBO0671	CAL82223	0.0.0	Unknown function	Unknown function, no known homologues	hypothetical protein	CBO0671	-0.104833	0.599745	0.859547	-0.259889	0.144873	0.23761
CBO0672	CAL82224	0.0.02	Unknown function	Conserved in other than E.coli	hypothetical protein	CBO0672	-0.089181	0.5157	0.815062	0.0428595	0.725704	0.813188
CBO0673	CAL82225	0.0.02	Unknown function	Conserved in other than E.coli	hypothetical protein	CBO0673	0.595882	0.0165693	0.105653	1.24608	1.06e-05	4.3e-05
CBO0674	CAL82226	6.2.01	Regulation	sigma factor	RNA polymerase factor sigma-70	CBO0674	0.283849	0.23613	0.577643	1.55139	0.000675427	0.00197789
CBO0675	CAL82227	2.2.01	Macromolecule synthesis, modification	Amino acyl tRNA synthesis; tRNA modification	dihydrouridine synthase	CBO0675	0.48712	0.0334759	0.17473	0.448917	0.0480909	0.0928825
CBO0676	CAL82228	2.2.11	Macromolecule synthesis, modification	RNA synthesis, modification, DNA transcription	transcription elongation factor GreA	CBO0676	0.390945	0.241342	0.584729	1.18244	0.00419353	0.0103878
CBO0677	CAL82229	0.0.02	Unknown function	Conserved in other than E.coli	hypothetical protein	CBO0677	0.486068	0.00937813	0.0694511	1.62644	9.51e-09	7.58e-08
CBO0678	CAL82230	2.2.03	Macromolecule synthesis, modification	DNA - replication, repair, restriction/modification	type I restriction enzyme M subunit	hsdM, CBO0678	-0.897808	0.00363181	0.0337647	-1.1322	0.000508017	0.00152628
CBO0679	CAL82231	2.2.03	Macromolecule synthesis, modification	DNA - replication, repair, restriction/modification	type I restriction enzyme S subunit	hsdS, CBO0679	-0.869577	0.00103658	0.0130084	-0.823884	0.000674139	0.00197522
CBO0680	CAL82232	0.0.0	Unknown function	Unknown function, no known homologues	hypothetical protein	CBO0680	-0.509298	0.000532086	0.00789854	-0.550268	0.000248817	0.000793035
CBO0681	CAL82233	0.0.02	Unknown function	Conserved in other than E.coli	hypothetical protein	CBO0681	-0.153543	0.270215	0.618354	-0.485775	0.00195361	0.00520201
CBO0682	CAL82234	2.2.03	Macromolecule synthesis, modification	DNA - replication, repair, restriction/modification	type I restriction enzyme R subunit	hsdR, CBO0682	-0.276203	0.230814	0.5713	-1.32248	0.000934527	0.00266715
CBO0683	CAL82235	2.2.03	Macromolecule synthesis, modification	DNA - replication, repair, restriction/modification	ATP-dependent DNA helicase	pcrA, CBO0683	-1.00703	1.36978e-05	0.000420198	-1.73596	2e-08	1.47e-07
CBO0684	CAL82236	0.0.0	Unknown function	Unknown function, no known homologues	hypothetical protein	CBO0684	0.0807324	0.592352	0.856731	0.130351	0.511604	0.635196
CBO0685	CAL82237	6.3.02	Regulation	AraC	AraC family transcriptional regulator	CBO0685	-0.0698805	0.706709	0.906692	2.42858	1.55e-10	2.14e-09
CBO0686	CAL82238	1.6.03	Adaptation	Fe storage	ferrichrome ABC transporter	fhuD2, CBO0686	-0.0971948	0.633181	0.874361	0.183293	0.37182	0.50226
CBO0687	CAL82239	1.6.03	Adaptation	Fe storage	ferrichrome ABC transporter permease	fhuB2, CBO0687	-0.146049	0.449317	0.775568	-0.31536	0.111768	0.191663
CBO0688	CAL82240	1.6.03	Adaptation	Fe storage	ferrichrome ABC transporter permease	fhuG2, CBO0688	0.153764	0.416445	0.750231	0.0685214	0.573818	0.690433
CBO0689	CAL82241	1.6.03	Adaptation	Fe storage	ferrichrome ABC transporter ATP-binding protein	fhuC2, CBO0689	0.108457	0.449962	0.775963	0.236719	0.162644	0.261337
CBO0690	CAL82242	3.3.21	Central intermediary metabolism	Other	nitrogenase iron protein	nifH, CBO0690	0.0798384	0.569893	0.843848	-0.139642	0.324576	0.453709
CBO0691	CAL82243	3.3.21	Central intermediary metabolism	Other	hypothetical protein	nifE1, CBO0691	-0.114067	0.300855	0.65051	-0.0118147	0.913427	0.944331
CBO0692	CAL82244	3.3.21	Central intermediary metabolism	Other	hypothetical protein	nifE2, CBO0692	-0.0314356	0.799101	0.943372	0.0901968	0.46803	0.59552
CBO0693	CAL82245	1.1.01	Cell processes	Chemotaxis and mobility	methyl-accepting chemotaxis protein	CBO0693	0.312899	0.0654116	0.274942	2.20523	2.67e-11	4.96e-10
CBO0694	CAL82246	0.0.0	Unknown function	Unknown function, no known homologues	hypothetical protein	CBO0694	0.37418	0.0300697	0.16227	1.96685	1.23e-09	1.27e-08
CBO0695	CAL82247	0.0.02	Unknown function	Conserved in other than E.coli	hypothetical protein	CBO0695	0.113221	0.391719	0.730315	-0.37883	0.00786403	0.0183696
CBO0696	CAL82248	3.4.02	Degradation of small molecules	Amino acids	glycine cleavage system aminomethyltransferase T	gcvT, CBO0696	-0.272107	0.111093	0.384744	-0.864379	0.00416716	0.0103322
CBO0697	CAL82249	3.4.02	Degradation of small molecules	Amino acids	glycine cleavage system protein H	gcvH, CBO0697	-0.459803	0.00585238	0.0483205	-1.30315	0.00019536	0.000636651
CBO0698	CAL82250	3.4.02	Degradation of small molecules	Amino acids	glycine dehydrogenase subunit 1	gcvP, CBO0698	-0.106394	0.610097	0.865177	0.168765	0.475872	0.602357
CBO0699	CAL82251	3.4.02	Degradation of small molecules	Amino acids	glycine dehydrogenase subunit 2	gcvP', CBO0699	-0.0753001	0.643175	0.879074	0.648552	0.0012779	0.00353867
CBO0700	CAL82252	3.4.03	Degradation of small molecules	Carbon compounds	dihydrolipoyl dehydrogenase (E3 component of pyruvate complex)	pdhD1, CBO0700	0.0568593	0.735462	0.919389	-0.994165	9.34e-06	3.83e-05
CBO0701	CAL82253	3.2.07	Biosynthesis of cofactors, carriers	Lipoate	lipoate-protein ligase A	lplA1, CBO0701	0.243978	0.19303	0.51939	-0.589293	0.00414535	0.0102926
CBO0702	CAL82254	0.0.0	Unknown function	Unknown function, no known homologues	hypothetical protein	CBO0702	-0.553296	0.000845602	0.0111719	-0.98914	7.33e-09	6.03e-08
CBO0703	CAL82255	6.3.02	Regulation	AraC	AraC family transcriptional regulator	CBO0703	0.126944	0.547053	0.833306	0.353966	0.01972	0.0421535
CBO0704	CAL82256	0.0.0	Unknown function	Unknown function, no known homologues	hypothetical protein	CBO0704	0.210933	0.48336	0.798593	-0.350238	0.249879	0.369721
CBO0705	CAL82257	0.0.02	Unknown function	Conserved in other than E.coli	hypothetical protein	CBO0705	0.0380288	0.773163	0.932715	1.00297	3.26e-06	1.47e-05
CBO0706	CAL82258	0.0.02	Unknown function	Conserved in other than E.coli	hypothetical protein	CBO0706	0.275897	0.10998	0.382235	1.56254	1.28e-08	9.83e-08
CBO0707	CAL82259	0.0.02	Unknown function	Conserved in other than E.coli	hypothetical protein	CBO0707	0.329565	0.0102508	0.0740328	1.65771	1.53e-09	1.55e-08
CBO0708	CAL82260	6.3.12	Regulation	MerR	MerR family transcriptional regulator	CBO0708	0.239891	0.165473	0.47728	0.676641	0.000661899	0.00194262
CBO0709	CAL82261	1.4.03	Protection responses	Drug/analogue sensitivity	ABC transporter ATP-binding protein	CBO0709	0.348331	0.0141155	0.0935308	0.738379	9.76e-05	0.000334618
CBO0710	CAL82262	1.4.03	Protection responses	Drug/analogue sensitivity	drug resistance ABC-2 type transporter permease	CBO0710	0.224798	0.210699	0.543479	0.447873	0.00124618	0.00346182
CBO0711	CAL82263	1.4.03	Protection responses	Drug/analogue sensitivity	drug resistance ABC transporter	CBO0711	-0.193299	0.121188	0.402567	-0.327157	0.0128785	0.0287637
CBO0712	CAL82264	2.2.03	Macromolecule synthesis, modification	DNA - replication, repair, restriction/modification	helicase	CBO0712	0.129223	0.321295	0.670496	-0.744757	7.84e-05	0.000272729
CBO0713	CAL82265	0.0.02	Unknown function	Conserved in other than E.coli	hypothetical protein	CBO0713	0.43584	0.0191746	0.11755	0.662126	9.43e-05	0.000324377
CBO0714	CAL82266	6.3.02	Regulation	AraC	AraC family transcriptional regulator	CBO0714	0.396259	0.0616959	0.264265	1.18827	1.01e-05	4.14e-05
CBO0715	CAL82267	4.1.06	Cell envelope	G+ membrane	transporter EamA family	CBO0715	0.196519	0.187548	0.511605	-0.323962	0.0131348	0.0292945
CBO0715A	CAL82268	6.5.0	Regulation	Others	putative transcriptional regulator (partial)	CBO0715A	0.0707654	0.600834	0.86026	0.545397	0.000615828	0.00181928
CBO0716	CAL82269	0.0.02	Unknown function	Conserved in other than E.coli	tfoX domain protein	CBO0716	NA	NA	NA	NA	NA	NA
CBO0717	CAL82270	7.0.0	Not classified	Not classified (included putative assignments)	acetyltransferase	CBO0717	-0.141643	0.428125	0.759404	1.88508	1.68e-09	1.67e-08
CBO0718	CAL82271	3.6.01	Fatty acid biosynthesis	Fatty acid and phosphatidic acid biosynthesis	3-oxoacyl-ACP synthase	CBO0718	-0.257163	0.053815	0.241485	-0.973718	2.62e-07	1.48e-06
CBO0719	CAL82272	1.1.01	Cell processes	Chemotaxis and mobility	methyl-accepting chemotaxis protein	CBO0719	-0.384121	0.03041	0.163555	-0.829533	0.00123059	0.00342274
CBO0720	CAL82273	0.0.02	Unknown function	Conserved in other than E.coli	hypothetical protein	CBO0720	0.312311	0.177642	0.497518	-1.3014	0.00016347	0.000538862
CBO0721	CAL82274	1.5.0	Transport/binding proteins	Transport/binding proteins	ABC transporter ATP-binding protein	CBO0721	1.56369	2.84499e-06	0.000125061	3.90276	6.14e-14	3.82e-12
CBO0722	CAL82275	0.0.0	Unknown function	Unknown function, no known homologues	hypothetical protein	CBO0722	1.15142	4.65954e-05	0.00115294	3.34628	4.57e-12	1.14e-10
CBO0723	CAL82276	0.0.02	Unknown function	Conserved in other than E.coli	DJ-1/PfpI family protein	CBO0723	0.205369	0.179521	0.5002	2.75424	4.56e-11	7.7e-10
CBO0724	CAL82277	3.1.06	Amino acid biosynthesis	Cysteine	cysteine synthase	cysK, CBO0724	0.430814	0.102753	0.365858	-1.22453	0.00391549	0.0097729
CBO0725	CAL82278	6.5.0	Regulation	Others	S-ribosylhomocysteinase	luxS, CBO0725	0.307658	0.0403856	0.197437	0.225829	0.156204	0.25316
CBO0726	CAL82279	3.1.14	Amino acid biosynthesis	Methionine	cystathionine beta-lyase	metC, CBO0726	0.322738	0.0313361	0.167061	-0.20165	0.407834	0.537442
CBO0727	CAL82280	0.0.02	Unknown function	Conserved in other than E.coli	hypothetical protein	CBO0727	0.166493	0.289293	0.637873	0.760646	8.46e-05	0.000292647
CBO0728	CAL82281	2.1.03	Macromolecule degradation	Degradation of polysaccharides	chitinase A	chiA, CBO0728	0.208938	0.186274	0.51025	-0.440042	0.0584426	0.109948
CBO0729	CAL82282	7.0.0	Not classified	Not classified (included putative assignments)	heavy-metal-binding protein	merP, CBO0729	-0.134035	0.254469	0.598743	0.739719	3.36e-06	1.51e-05
CBO0730	CAL82283	0.0.02	Unknown function	Conserved in other than E.coli	hypothetical protein	CBO0730	-0.0291218	0.8666	0.964986	-0.218705	0.142092	0.233755
CBO0731	CAL82284	0.0.02	Unknown function	Conserved in other than E.coli	hypothetical protein	CBO0731	-0.372274	0.0255101	0.145033	-0.447346	0.0637599	0.118542
CBO0732	CAL82285	5.1.02	Laterally acquired elements	Phage-related functions and prophages	hypothetical protein	CBO0732	0.159618	0.339996	0.685612	1.74964	2.23e-09	2.13e-08
CBO0733	CAL82286	5.1.02	Laterally acquired elements	Phage-related functions and prophages	DNA-binding protein	CBO0733	0.143695	0.278895	0.628072	3.12553	5.06e-09	4.34e-08
CBO0734	CAL82287	5.1.02	Laterally acquired elements	Phage-related functions and prophages	DNA-binding protein	CBO0734	0.269057	0.0705043	0.289618	2.25581	1.11e-12	3.63e-11
CBO0735	CAL82288	5.1.02	Laterally acquired elements	Phage-related functions and prophages	phage replication protein	CBO0735	0.117438	0.470063	0.7904	1.98652	7.94e-10	8.76e-09
CBO0736	CAL82289	6.2.01	Regulation	sigma factor	RNA polymerase sigma factor	CBO0736	0.012392	0.942459	0.986853	1.94715	1.1e-07	6.72e-07
CBO0737	CAL82290	0.0.02	Unknown function	Conserved in other than E.coli	hypothetical protein	CBO0737	-0.0633289	0.607651	0.864289	1.98638	1.32e-12	4.13e-11
CBO0738	CAL82291	4.1.06	Cell envelope	G+ membrane	hypothetical protein	CBO0738	0.0712622	0.554957	0.836463	0.983428	6.66e-09	5.55e-08
CBO0739	CAL82292	7.0.0	Not classified	Not classified (included putative assignments)	hypothetical protein	CBO0739	-0.202382	0.198405	0.527059	0.105651	0.494985	0.619992
CBO0740	CAL82293	0.0.02	Unknown function	Conserved in other than E.coli	hypothetical protein	CBO0740	0.227957	0.109978	0.382235	0.993289	6.53e-07	3.41e-06
CBO0741	CAL82294	0.0.02	Unknown function	Conserved in other than E.coli	hypothetical protein	CBO0741	0.29177	0.0381277	0.190421	0.629376	0.00012417	0.000418428
CBO0742	CAL82295	5.1.02	Laterally acquired elements	Phage-related functions and prophages	phage related N-acetylmuramoyl-L-alanine amidase	CBO0742	-0.0104361	0.954826	0.989992	-0.0670275	0.727681	0.814325
CBO0743	CAL82296	0.0.0	Unknown function	Unknown function, no known homologues	hypothetical protein	CBO0743	-0.0312788	0.840187	0.954751	-0.359418	0.0109151	0.0247687
CBO0744	CAL82297	5.1.04	Laterally acquired elements	Transposon-related functions	insertion sequence putative ATP-binding protein (fragment)	CBO0744	0.0680685	0.583935	0.851891	-0.0556831	0.653721	0.757054
CBO0745	CAL82298	5.1.05	Laterally acquired elements	Pathogenicity island-related functions	putative regulatory protein (partial)	CBO0745	-0.0131306	0.937883	0.985559	0.0985933	0.560219	0.67848
CBO0746	CAL82299	5.1.02	Laterally acquired elements	Phage-related functions and prophages	phage-like protein	CBO0746	-0.0222151	0.910537	0.97819	-0.167499	0.40132	0.531167
CBO0746A	CAL82300	5.1.02	Laterally acquired elements	Phage-related functions and prophages	putative phage related lysin (partial)	CBO0746A	-0.110161	0.359592	0.704281	-0.172786	0.117124	0.19909
CBO0747	CAL82301	0.0.02	Unknown function	Conserved in other than E.coli	hypothetical protein	CBO0747	-0.105929	0.478018	0.795207	-0.139935	0.351029	0.481156
CBO0748	CAL82302	5.1.02	Laterally acquired elements	Phage-related functions and prophages	hypothetical protein	CBO0748	-0.108386	0.591554	0.856222	0.36366	0.0560434	0.106068
CBO0749	CAL82303	5.1.04	Laterally acquired elements	Transposon-related functions	putative transposase (partial)	CBO0749	-0.197317	0.271156	0.619275	-0.466132	0.00347771	0.0087833
CBO0750	CAL82304	7.0.0	Not classified	Not classified (included putative assignments)	LysM domain-containing protein	CBO0750	-0.0823873	0.521687	0.818592	-0.0950275	0.625214	0.734089
CBO0751	CAL82305	1.4.02	Protection responses	Detoxification	arsenate reductase	arsC, CBO0751	-0.65169	0.0015092	0.017372	-3.256	1.47e-13	7.31e-12
CBO0752	CAL82306	4.1.06	Cell envelope	G+ membrane	hypothetical protein	CBO0752	-0.42179	0.0258556	0.146048	-0.886405	6.75e-05	0.000237358
CBO0753	CAL82307	6.3.13	Regulation	ArsR	arsenical resistance operon repressor	arsR, CBO0753	0.13833	0.327505	0.676726	1.234	3.98e-09	3.52e-08
CBO0754	CAL82308	6.5.0	Regulation	Others	arsenical resistence operon repressor ArsD	arsD, CBO0754	0.0481554	0.699844	0.90366	1.33653	1.47e-09	1.49e-08
CBO0755	CAL82309	1.4.02	Protection responses	Detoxification	arsenical pump-driving ATPase ArsA	arsA, CBO0755	0.146354	0.400974	0.73887	1.28377	0.00033363	0.00103782
CBO0756	CAL82310	1.4.02	Protection responses	Detoxification	arsenical-resistance protein	arsB, CBO0756	0.102595	0.542794	0.830849	1.09148	4.46e-06	1.95e-05
CBO0757	CAL82311	0.0.02	Unknown function	Conserved in other than E.coli	conserved hypothetical protein (pseudogene)	CBO0757	-0.187335	0.475836	0.794422	0.709535	0.0126399	0.028291
CBO0759	CAL82312	0.0.02	Unknown function	Conserved in other than E.coli	phosphoglycerate mutase	CBO0759	-0.094753	0.727346	0.915773	0.132571	0.314559	0.442022
CBO0760	CAL82313	6.3.08	Regulation	TetR	TetR family transcriptional regulator	CBO0760	-0.141334	0.308305	0.657781	0.198372	0.117754	0.20001
CBO0761	CAL82314	4.1.06	Cell envelope	G+ membrane	hypothetical protein	CBO0761	-0.27115	0.0137103	0.0919545	-0.144974	0.2271	0.342646
CBO0762	CAL82315	5.1.04	Laterally acquired elements	Transposon-related functions	conjugative transposon protein	CBO0762	-0.42559	0.00415347	0.0374789	-0.128837	0.468615	0.595928
CBO0763	CAL82316	7.0.0	Not classified	Not classified (included putative assignments)	DNA-binding protein	CBO0763	0.423809	0.00125665	0.0150466	1.17412	1.04e-07	6.39e-07
CBO0764	CAL82317	4.1.06	Cell envelope	G+ membrane	hypothetical protein	CBO0764	0.334714	0.0590809	0.256947	1.49025	2.29e-07	1.31e-06
CBO0765	CAL82318	1.5.0	Transport/binding proteins	Transport/binding proteins	ABC transporter ATP-binding protein	CBO0765	-0.0906832	0.409274	0.744423	-0.93271	0.000911046	0.00260533
CBO0766	CAL82319	1.5.0	Transport/binding proteins	Transport/binding proteins	ABC transporter permease	CBO0766	0.0995945	0.468939	0.789023	0.47501	0.0116442	0.0262828
CBO0767	CAL82320	1.5.0	Transport/binding proteins	Transport/binding proteins	ABC transporter permease	CBO0767	0.332023	0.100392	0.360462	0.58105	0.000559981	0.00166775
CBO0767A	CAL82321	0.0.02	Unknown function	Conserved in other than E.coli	hypothetical protein	CBO0767A	-0.116689	0.444139	0.771884	-0.383043	0.0255093	0.0531498
CBO0768	CAL82322	5.1.02	Laterally acquired elements	Phage-related functions and prophages	thymidylate synthase	CBO0768	-0.0892887	0.523311	0.819131	0.158011	0.264157	0.386271
CBO0769	CAL82323	7.0.0	Not classified	Not classified (included putative assignments)	UbiE/COQ5 family methyltransferase	CBO0769	0.246795	0.0542781	0.242801	-0.517871	0.00038625	0.00118696
CBO0770	CAL82324	3.4.05	Degradation of small molecules	Other	thiaminase I	CBO0770	0.271592	0.028565	0.156466	0.590182	0.107268	0.185119
CBO0771	CAL82325	3.2.14	Biosynthesis of cofactors, carriers	Thiamin	phosphomethylpyrimidine kinase	thiD2, CBO0771	-0.886297	4.11026e-06	0.0001639	-0.398162	0.00984921	0.0225417
CBO0772	CAL82326	0.0.0	Unknown function	Unknown function, no known homologues	hypothetical protein	CBO0772	-0.343091	0.0481459	0.223832	-1.15021	3.95e-07	2.16e-06
CBO0773	CAL82327	4.1.06	Cell envelope	G+ membrane	hypothetical protein	CBO0773	-0.195453	0.245167	0.589306	-0.99876	6.92e-06	2.91e-05
CBO0774	CAL82328	1.5.0	Transport/binding proteins	Transport/binding proteins	ABC transporter ATP-binding protein	CBO0774	0.0222767	0.893738	0.973503	0.889761	4.45e-06	1.95e-05
CBO0775	CAL82329	4.1.06	Cell envelope	G+ membrane	hypothetical protein	CBO0775	0.116105	0.353748	0.699471	-0.160218	0.291395	0.416748
CBO0776	CAL82330	6.1.02	Regulation	Response regulator	DNA-binding response regulator	CBO0776	-0.659467	3.91338e-05	0.00100301	0.339236	0.01214	0.0272925
CBO0777	CAL82331	1.5.0	Transport/binding proteins	Transport/binding proteins	bacitracin ABC transporter ATP-binding protein	CBO0777	-0.305439	0.042805	0.205882	0.441731	0.0227142	0.0478262
CBO0778	CAL82332	4.1.06	Cell envelope	G+ membrane	hypothetical protein	CBO0778	-0.138568	0.362959	0.707881	0.460287	0.0113452	0.0256669
CBO0779	CAL82333	6.3.02	Regulation	AraC	AraC family transcriptional regulator	CBO0779	0.119967	0.41824	0.750751	0.759902	0.000236012	0.000756595
CBO0780	CAL82334	6.1.01	Regulation	Sensor kinase	sensor histidine kinase	CBO0780	-0.11677	0.445267	0.772791	-0.160269	0.42842	0.55724
CBO0781	CAL82335	0.0.02	Unknown function	Conserved in other than E.coli	hypothetical protein	CBO0781	-0.132886	0.406029	0.741257	1.12846	3.36e-06	1.51e-05
CBO0782	CAL82336	0.0.0	Unknown function	Unknown function, no known homologues	hypothetical protein	CBO0782	-0.833864	0.000152618	0.00296147	-0.785232	0.00122654	0.00341206
CBO0783	CAL82337	1.5.0	Transport/binding proteins	Transport/binding proteins	ABC transporter ATP-binding protein	CBO0783	0.680109	0.0030191	0.02931	-1.47188	3.47e-08	2.39e-07
CBO0784	CAL82338	1.5.0	Transport/binding proteins	Transport/binding proteins	ABC transporter permease	CBO0784	1.08854	4.61425e-06	0.000176678	0.0817681	0.639742	0.745639
CBO0785	CAL82339	0.0.0	Unknown function	Unknown function, no known homologues	hypothetical protein	CBO0785	0.798729	0.000353058	0.00576955	-0.421434	0.0508725	0.0973587
CBO0786	CAL82340	6.1.02	Regulation	Response regulator	DNA-binding response regulator	CBO0786	-0.255589	0.201875	0.531869	-1.0193	1.73e-05	6.76e-05
CBO0787	CAL82341	6.1.01	Regulation	Sensor kinase	sensor histidine kinase	CBO0787	-0.0609822	0.664341	0.887773	-1.21578	8.31e-07	4.25e-06
CBO0788	CAL82342	0.0.02	Unknown function	Conserved in other than E.coli	hypothetical protein	CBO0788	-0.287157	0.0720688	0.294049	-1.06529	1.04e-06	5.2e-06
CBO0789	CAL82343	1.8.01	Differentiation/sporulation/Germination	Differentiation/sporulation/Germination	small acid-soluble spore protein, H-type	CBO0789	0.0478742	0.667912	0.88893	-0.210076	0.113579	0.194219
CBO0790	CAL82344	4.1.06	Cell envelope	G+ membrane	hypothetical protein	CBO0790	-0.032739	0.771588	0.93215	-0.650763	1.26e-05	5.04e-05
CBO0791	CAL82345	3.1.13	Amino acid biosynthesis	Lysine	dihydrodipicolinate reductase	dapB, CBO0791	-2.04092	8.37394e-11	5.10104e-08	-2.87027	2.95e-13	1.3e-11
CBO0792	CAL82346	3.3.19	Central intermediary metabolism	Sulfur metabolism	sulfurtransferase	sseA, CBO0792	-1.43273	2.34477e-07	1.8738e-05	-1.34761	5.68e-07	3e-06
CBO0793	CAL82347	0.0.0	Unknown function	Unknown function, no known homologues	hypothetical protein	CBO0793	-0.199044	0.177254	0.496819	0.089768	0.534877	0.656218
CBO0794	CAL82348	0.0.0	Unknown function	Unknown function, no known homologues	hypothetical protein	CBO0794	0.195969	0.345081	0.690997	0.273276	0.113739	0.194428
CBO0795	CAL82349	0.0.0	Unknown function	Unknown function, no known homologues	hypothetical protein	CBO0795	-0.109431	0.392799	0.73133	0.872866	1.72e-05	6.72e-05
CBO0796	CAL82350	0.0.0	Unknown function	Unknown function, no known homologues	hypothetical protein	CBO0796	0.0915983	0.623159	0.870503	0.10601	0.509174	0.633377
CBO0797	CAL82351	0.0.0	Unknown function	Unknown function, no known homologues	hypothetical protein	CBO0797	0.0531263	0.728709	0.916463	0.14482	0.304603	0.431461
CBO0798	CAL82352	1.1.01	Cell processes	Chemotaxis and mobility	flagellin	CBO0798	-0.236893	0.143371	0.442051	-0.172703	0.279613	0.40314
CBO0799	CAL82353	0.0.0	Unknown function	Unknown function, no known homologues	hypothetical protein	CBO0799	0.354968	0.0412454	0.200767	0.329705	0.0561796	0.106287
CBO0800	CAL82354	5.1.04	Laterally acquired elements	Transposon-related functions	putative transposase (partial)	CBO0800	-0.0302681	0.882342	0.969991	0.382527	0.0124084	0.0278283
CBO0801	CAL82355	5.1.05	Laterally acquired elements	Pathogenicity island-related functions	hemagglutinin component of the neurotoxin complex	ha70, CBO0801	0.212892	0.174718	0.492661	1.28326	2.03e-05	7.83e-05
CBO0802	CAL82356	5.1.05	Laterally acquired elements	Pathogenicity island-related functions	hemagglutinin component of the neurotoxin complex	ha17, ha-17, CBO0802	0.174163	0.290006	0.638208	1.59132	6.15e-09	5.18e-08
CBO0803	CAL82357	5.1.05	Laterally acquired elements	Pathogenicity island-related functions	hemagglutinin component of the neurotoxin complex	ha33, ha-33, CBO0803	-0.0170866	0.904444	0.976957	1.01032	0.000149028	0.000494259
CBO0804	CAL82358	6.2.01	Regulation	sigma factor	transcriptional regulator BotR, P-21	botR, p-21, CBO0804	-0.259962	0.164115	0.475367	0.153303	0.403963	0.533464
CBO0805	CAL82359	5.1.05	Laterally acquired elements	Pathogenicity island-related functions	type A progenitor toxin nontoxic-nonha	ntnH, ant, CBO0805	0.199474	0.307831	0.657357	0.132101	0.496076	0.621012
CBO0806	CAL82360	5.1.05	Laterally acquired elements	Pathogenicity island-related functions	botulinum neurotoxin type A	botA, bna, atx, CBO0806	0.480553	0.0971156	0.353693	0.258015	0.360432	0.490923
CBO0807	CAL82361	5.1.04	Laterally acquired elements	Transposon-related functions	transposase (pseudogene)	CBO0807	0.0436857	0.814384	0.947821	0.084714	0.60727	0.719121
CBO0809	CAL82362	5.1.04	Laterally acquired elements	Transposon-related functions	putative transposase (pseudogene)	CBO0809	0.173924	0.248782	0.593129	0.807936	8.42e-06	3.48e-05
CBO0810	CAL82363	5.1.04	Laterally acquired elements	Transposon-related functions	transposase for insertion sequence element IS904	CBO0810	-0.104807	0.41432	0.748583	0.0414326	0.705955	0.798678
CBO0811	CAL82364	4.1.06	Cell envelope	G+ membrane	hypothetical protein	CBO0811	-0.632364	0.00527381	0.0445725	-0.117376	0.525469	0.647475
CBO0812	CAL82365	7.0.0	Not classified	Not classified (included putative assignments)	amidohydrolase	CBO0812	-0.237591	0.331428	0.680012	-0.09957	0.637918	0.744506
CBO0813	CAL82366	1.5.01	Transport/binding proteins	Amino acids and amines	branched-chain amino acid transport system carrier II protein	CBO0813	0.143199	0.502332	0.807677	0.391396	0.0771797	0.139912
CBO0814	CAL82367	1.5.01	Transport/binding proteins	Amino acids and amines	branched chain amino acid transport system carrier II protein	CBO0814	-0.0599507	0.626849	0.871672	-0.15139	0.217694	0.331168
CBO0815	CAL82368	1.1.01	Cell processes	Chemotaxis and mobility	methyl-accepting chemotaxis protein/ extracellular solute-binding protein, family 5	CBO0815	-0.418863	0.0348571	0.179557	-1.95827	2.11e-09	2.02e-08
CBO0816	CAL82369	1.6.03	Adaptation	Fe storage	ferrous iron transport protein A	feoA, CBO0816	-0.0679129	0.734609	0.919109	-0.225241	0.268107	0.390377
CBO0817	CAL82370	1.6.03	Adaptation	Fe storage	ferrous iron transport protein B	feoB, CBO0817	-0.0895762	0.58972	0.855091	-0.471068	0.0112963	0.0255674
CBO0818	CAL82371	1.6.03	Adaptation	Fe storage	ferrous iron transport protein B	feoB', CBO0818	-0.17419	0.171921	0.488362	0.359493	0.017282	0.0375489
CBO0819	CAL82372	3.2.03	Biosynthesis of cofactors, carriers	Cobalamin	alpha-ribazole-5'-phosphate phosphatase	cobC, CBO0819	0.0729888	0.667451	0.888752	-0.184186	0.367488	0.497904
CBO0820	CAL82373	4.1.07	Cell envelope	G+ exported/lipoprotein	exported protein	CBO0820	0.0559078	0.800806	0.943844	-0.66864	0.00481778	0.0117674
CBO0821	CAL82374	3.2.03	Biosynthesis of cofactors, carriers	Cobalamin	cobalamin synthase	cobS, CBO0821	-0.199572	0.147766	0.449177	-0.544037	0.0266954	0.0553281
CBO0822	CAL82375	0.0.02	Unknown function	Conserved in other than E.coli	hypothetical protein	CBO0822	-0.661778	2.31014e-05	0.000655039	-2.15511	1.37e-12	4.26e-11
CBO0823	CAL82376	4.1.06	Cell envelope	G+ membrane	hypothetical protein	CBO0823	0.11235	0.47581	0.794422	-0.465638	0.00505291	0.0122978
CBO0824	CAL82377	0.0.02	Unknown function	Conserved in other than E.coli	hypothetical protein	CBO0824	0.138386	0.405966	0.741257	-1.38986	7.12e-07	3.69e-06
CBO0825	CAL82378	0.0.02	Unknown function	Conserved in other than E.coli	hypothetical protein	CBO0825	-0.151603	0.309231	0.658559	-0.461299	0.0979781	0.171778
CBO0826	CAL82379	4.1.07	Cell envelope	G+ exported/lipoprotein	hypothetical protein	CBO0826	0.189153	0.131388	0.421711	-1.52976	1.55e-09	1.56e-08
CBO0827	CAL82380	3.2.05	Biosynthesis of cofactors, carriers	Folic acid	6-pyruvoyl tetrahydrobiopterin synthase	CBO0827	-0.185494	0.267511	0.61538	-1.0627	0.00011367	0.000385023
CBO0828	CAL82381	3.2.05	Biosynthesis of cofactors, carriers	Folic acid	dihydropteroate synthase	folP, dhpS, CBO0828	-0.325071	0.141227	0.438707	-0.647612	0.000100636	0.000344508
CBO0829	CAL82382	0.0.0	Unknown function	Unknown function, no known homologues	hypothetical protein	CBO0829	0.0272499	0.822469	0.950099	-0.733256	2.91e-06	1.33e-05
CBO0830	CAL82383	3.2.05	Biosynthesis of cofactors, carriers	Folic acid	2-amino-4-hydroxy-6- hydroxymethyldihydropteridine pyrophosphokinase	folK, CBO0830	0.137699	0.309502	0.658642	-1.00418	9.27e-05	0.000319215
CBO0831	CAL82384	1.6.01	Adaptation	Adaptations, atypical conditions	heat shock protein	CBO0831	0.0990385	0.443345	0.771187	-0.830624	9e-06	3.7e-05
CBO0832	CAL82385	6.3.12	Regulation	MerR	MerR family transcriptional regulator	CBO0832	-0.329006	0.0378114	0.189442	0.547787	0.00146978	0.0040212
CBO0833	CAL82386	1.8.01	Differentiation/sporulation/Germination	Differentiation/sporulation/Germination	exopolysaccharide biosynthesis protein	CBO0833	0.0509849	0.671455	0.890417	-1.12285	0.00083945	0.00241242
CBO0834	CAL82387	6.5.0	Regulation	Others	pleiotropic regulatory protein	degT, CBO0834	-0.171545	0.209371	0.541031	-1.67304	5.83e-09	4.93e-08
CBO0835	CAL82388	1.4.0	Protection responses	Protection responses	nitroimidazole resistance protein	CBO0835	1.62039	8.72967e-07	5.05069e-05	2.52436	9.58e-10	1.03e-08
CBO0836	CAL82389	6.2.01	Regulation	sigma factor	RNA polymerase sigma-70 factor, ECF family	CBO0836	-0.0376146	0.782681	0.935804	0.76324	1.84e-05	7.15e-05
CBO0837	CAL82390	4.1.06	Cell envelope	G+ membrane	hypothetical protein	CBO0837	0.124297	0.304542	0.654509	0.788342	8.79e-06	3.62e-05
CBO0838	CAL82391	3.5.03	Energy metabolism, carbon	Electron transport	flavoredoxin	CBO0838	-0.196549	0.17957	0.500245	-0.0958819	0.504792	0.629221
CBO0839	CAL82392	4.1.06	Cell envelope	G+ membrane	hypothetical protein	CBO0839	0.128462	0.357281	0.703167	0.188822	0.398005	0.527711
CBO0840	CAL82393	3.3.21	Central intermediary metabolism	Other	non-heme chloroperoxidase	CBO0840	0.141597	0.49538	0.804342	0.286677	0.17552	0.278331
CBO0841	CAL82394	1.5.0	Transport/binding proteins	Transport/binding proteins	cadmium resistance transporter CadD	CBO0841	0.0710274	0.64714	0.881114	0.183899	0.243343	0.362192
CBO0842	CAL82395	0.0.02	Unknown function	Conserved in other than E.coli	hypothetical protein	CBO0842	-0.337846	0.0627101	0.26703	-0.277331	0.121012	0.204623
CBO0843	CAL82396	6.3.01	Regulation	AsnC	transcription regulator AsnC	CBO0843	-0.356766	0.0662583	0.277242	-0.826446	0.000240319	0.000768368
CBO0844	CAL82397	0.0.02	Unknown function	Conserved in other than E.coli	hypothetical protein	CBO0844	-0.306056	0.117497	0.39535	-0.323594	0.0453776	0.0883578
CBO0845	CAL82398	1.5.0	Transport/binding proteins	Transport/binding proteins	ABC transporter permease	CBO0845	-0.217436	0.324153	0.673819	-0.143387	0.35735	0.487738
CBO0846	CAL82399	1.5.0	Transport/binding proteins	Transport/binding proteins	ABC transporter ATP-binding protein	CBO0846	-0.108301	0.480505	0.797144	-0.846549	1.82e-05	7.07e-05
CBO0847	CAL82400	6.5.0	Regulation	Others	DNA-binding protein	CBO0847	-0.0216123	0.87996	0.969104	-0.770399	1.2e-05	4.8e-05
CBO0848	CAL82401	0.0.02	Unknown function	Conserved in other than E.coli	hypothetical protein	CBO0848	0.0870037	0.503159	0.808047	1.71392	8.15e-11	1.25e-09
CBO0849	CAL82402	3.3.21	Central intermediary metabolism	Other	non-heme chloroperoxidase	CBO0849	0.295645	0.0224766	0.132676	1.77313	6.88e-12	1.59e-10
CBO0850	CAL82403	7.0.0	Not classified	Not classified (included putative assignments)	GNAT family acetyltransferase	CBO0850	0.521393	0.104016	0.368672	1.48709	1.06e-06	5.28e-06
CBO0851	CAL82404	0.0.02	Unknown function	Conserved in other than E.coli	pentapeptide repeat-containing protein	CBO0851	0.230465	0.220064	0.557672	1.34681	4.36e-05	0.000158624
CBO0852	CAL82405	3.5.03	Energy metabolism, carbon	Electron transport	NAD(P)H dehydrogenase	CBO0852	-0.0452277	0.788505	0.937707	0.689188	0.000423526	0.00129267
CBO0853	CAL82406	3.5.03	Energy metabolism, carbon	Electron transport	iron-sulfur flavoprotein	CBO0853	0.0364357	0.857393	0.961769	0.429811	0.00723935	0.0170599
CBO0854	CAL82407	6.3.13	Regulation	ArsR	transcription regulator ArsR	CBO0854	-0.272867	0.0249646	0.143165	0.00675386	0.952562	0.969316
CBO0855	CAL82408	6.3.12	Regulation	MerR	MerR family transcriptional regulator	CBO0855	-0.667053	0.000179319	0.00335547	-0.513433	0.000173447	0.000570078
CBO0856	CAL82409	7.0.0	Not classified	Not classified (included putative assignments)	GNAT family acetyltransferase	CBO0856	0.0873199	0.682441	0.89616	0.936711	0.000274321	0.000867387
CBO0857	CAL82410	0.0.0	Unknown function	Unknown function, no known homologues	hypothetical protein	CBO0857	0.137838	0.428886	0.759809	1.73685	8.21e-09	6.67e-08
CBO0858	CAL82411	0.0.02	Unknown function	Conserved in other than E.coli	hypothetical protein	CBO0858	-0.0581222	0.683125	0.896385	1.54582	1.16e-09	1.21e-08
CBO0859	CAL82412	7.0.0	Not classified	Not classified (included putative assignments)	GNAT family acetyltransferase	CBO0859	0.0886806	0.526542	0.8213	0.852355	6.06e-06	2.58e-05
CBO0860	CAL82413	7.0.0	Not classified	Not classified (included putative assignments)	hypothetical protein	CBO0860	0.659717	0.00427016	0.0382685	4.19578	2.07e-14	1.61e-12
CBO0861	CAL82414	6.5.0	Regulation	Others	transcriptional regulator	CBO0861	-0.110488	0.487332	0.799397	1.93322	1.31e-10	1.87e-09
CBO0862	CAL82415	7.0.0	Not classified	Not classified (included putative assignments)	nitroreductase	CBO0862	-0.158946	0.582199	0.85122	3.01121	8.36e-13	2.86e-11
CBO0863	CAL82416	3.4.05	Degradation of small molecules	Other	secreted lipase	lipA, CBO0863	1.70243	3.43052e-06	0.000144348	4.81758	1.78e-13	8.53e-12
CBO0864	CAL82417	3.4.03	Degradation of small molecules	Carbon compounds	oxalate decarboxylase	oxdD, CBO0864	0.054866	0.696201	0.901961	-0.519266	0.00230592	0.00606321
CBO0865	CAL82418	3.4.02	Degradation of small molecules	Amino acids	decarboxylase	CBO0865	-0.255082	0.0631285	0.268138	-0.531535	0.00647616	0.0154114
CBO0866	CAL82419	4.1.06	Cell envelope	G+ membrane	hypothetical protein	CBO0866	-0.162106	0.225393	0.564002	-0.388869	0.00363054	0.00912681
CBO0867	CAL82420	6.3.06	Regulation	LysR	LysR family transcriptional regulator	CBO0867	-0.207323	0.158769	0.467348	0.341871	0.019661	0.0420673
CBO0868	CAL82421	7.0.0	Not classified	Not classified (included putative assignments)	acetyltransferase	CBO0868	0.208897	0.294005	0.643857	0.331327	0.02435	0.0509231
CBO0869	CAL82422	0.0.0	Unknown function	Unknown function, no known homologues	hypothetical protein	CBO0869	-0.00370063	0.969978	0.992705	-0.280261	0.00946428	0.0217588
CBO0870	CAL82423	4.1.06	Cell envelope	G+ membrane	hypothetical protein	CBO0870	0.188877	0.317362	0.666889	-0.0597826	0.588005	0.703309
CBO0871	CAL82424	0.0.02	Unknown function	Conserved in other than E.coli	hypothetical protein	CBO0871	0.0655202	0.653754	0.883822	0.359266	0.0436975	0.0853715
CBO0872	CAL82425	0.0.02	Unknown function	Conserved in other than E.coli	hypothetical protein	CBO0872	-0.214949	0.28196	0.632079	-0.0645216	0.743201	0.82603
CBO0873	CAL82426	0.0.02	Unknown function	Conserved in other than E.coli	hypothetical protein	CBO0873	-0.126761	0.581331	0.851015	-0.251162	0.11868	0.201328
CBO0874	CAL82427	4.1.06	Cell envelope	G+ membrane	hypothetical protein	CBO0874	0.199485	0.283787	0.634062	0.187297	0.298427	0.425047
CBO0875	CAL82428	4.1.06	Cell envelope	G+ membrane	hypothetical protein	CBO0875	-0.322668	0.0862568	0.32939	-0.583241	0.00187072	0.00500757
CBO0876	CAL82429	2.2.10	Macromolecule synthesis, modification	Proteins - translation and modification	peptide deformylase	defA, def, CBO0876	-0.0172284	0.910822	0.97827	0.203656	0.131501	0.219157
CBO0877	CAL82430	6.3.03	Regulation	GntR	GntR family transcriptional regulator	CBO0877	-0.167166	0.302142	0.652059	0.200391	0.265297	0.387397
CBO0878	CAL82431	7.0.0	Not classified	Not classified (included putative assignments)	nitroreductase	CBO0878	0.0877814	0.584041	0.851891	-0.316293	0.0539026	0.102398
CBO0879	CAL82432	7.0.0	Not classified	Not classified (included putative assignments)	(Fe-S)-binding protein	CBO0879	0.0486409	0.786729	0.937495	-0.199095	0.149974	0.244651
CBO0880	CAL82433	6.5.0	Regulation	Others	transcription antiterminator	licT, CBO0880	-0.433095	0.0558987	0.247797	-0.319067	0.0504158	0.0966493
CBO0881	CAL82434	1.5.03	Transport/binding proteins	Carbohydrates, organic acids and alcohols	PTS system beta-glucoside-specific transporter subunit IIABC	bglF, bglC, bglS, CBO0881	0.409005	0.077979	0.309888	0.172614	0.239623	0.357842
CBO0882	CAL82435	3.4.03	Degradation of small molecules	Carbon compounds	glycosyl hydrolase family protein	ascB, CBO0882	0.200156	0.296446	0.646503	0.489233	0.00387617	0.00968444
CBO0883	CAL82436	0.0.0	Unknown function	Unknown function, no known homologues	hypothetical protein	CBO0883	0.220322	0.149794	0.453033	0.0907753	0.543567	0.663948
CBO0884	CAL82437	4.1.09	Cell envelope	G+ peptidoglycan, teichoic acid	phospho-N-acetylmuramoyl-pentapeptide- transferase	mraY1, murX1, CBO0884	0.0797654	0.563665	0.841914	0.325618	0.026923	0.0557262
CBO0885	CAL82438	6.5.0	Regulation	Others	DNA-binding protein	CBO0885	-0.0160237	0.924617	0.981932	-0.356805	0.0460743	0.0895371
CBO0886	CAL82439	1.4.0	Protection responses	Protection responses	chloramphenicol acetyltransferase	CBO0886	-0.265916	0.144712	0.444156	-0.346079	0.0196944	0.0421159
CBO0887	CAL82440	0.0.02	Unknown function	Conserved in other than E.coli	hypothetical protein	CBO0887	0.0122196	0.933861	0.984217	-0.11449	0.440494	0.568528
CBO0888	CAL82441	0.0.02	Unknown function	Conserved in other than E.coli	hypothetical protein	CBO0888	-0.310214	0.0604623	0.26042	-1.25653	1.1e-06	5.44e-06
CBO0890	CAL82442	1.8.01	Differentiation/sporulation/Germination	Differentiation/sporulation/Germination	spore coat protein	cotA, pig, CBO0890	0.0851176	0.707609	0.907192	0.226586	0.272093	0.394902
CBO0891	CAL82443	0.0.02	Unknown function	Conserved in other than E.coli	hypothetical protein	CBO0891	0.148627	0.352546	0.698479	0.104179	0.456493	0.584193
CBO0892	CAL82444	1.8.01	Differentiation/sporulation/Germination	Differentiation/sporulation/Germination	spore appendage protein	CBO0892	-0.076916	0.683732	0.89693	0.416296	0.0373883	0.0743749
CBO0893	CAL82445	4.1.06	Cell envelope	G+ membrane	hypothetical protein	CBO0893	-0.153456	0.368184	0.713003	-0.318671	0.0708345	0.12983
CBO0894	CAL82446	7.0.0	Not classified	Not classified (included putative assignments)	peptidyl-arginine deiminase	CBO0894	0.436779	0.0101193	0.0733859	3.5903	3.27e-15	3.7e-13
CBO0895	CAL82447	6.5.0	Regulation	Others	transcriptional regulator	CBO0895	-0.0892096	0.65158	0.883541	0.525455	0.0141664	0.0313377
CBO0896	CAL82448	4.1.06	Cell envelope	G+ membrane	drug/metabolite transporter DMT family	CBO0896	0.0996406	0.446037	0.772986	0.218134	0.104819	0.181764
CBO0897	CAL82449	0.0.02	Unknown function	Conserved in other than E.coli	hypothetical protein	CBO0897	0.0573141	0.649194	0.88209	-0.579489	0.00106543	0.00300048
CBO0898	CAL82450	0.0.02	Unknown function	Conserved in other than E.coli	ErfK/YbiS/YcfS/YnhG family protein	CBO0898	0.0308889	0.809281	0.945904	0.126143	0.527333	0.649142
CBO0899	CAL82451	0.0.0	Unknown function	Unknown function, no known homologues	hypothetical protein	CBO0899	-0.0292842	0.808007	0.945609	0.291574	0.0240405	0.0503361
CBO0900	CAL82452	0.0.0	Unknown function	Unknown function, no known homologues	hypothetical protein	CBO0900	-0.0352159	0.801875	0.944228	-0.439977	0.0456417	0.0888171
CBO0901	CAL82453	0.0.0	Unknown function	Unknown function, no known homologues	hypothetical protein	CBO0901	-0.107655	0.452613	0.777425	-0.594894	0.25342	0.373695
CBO0902	CAL82454	0.0.02	Unknown function	Conserved in other than E.coli	hypothetical protein	CBO0902	-0.303905	0.0567374	0.250189	-1.33434	0.000782152	0.00226222
CBO0903	CAL82455	4.1.06	Cell envelope	G+ membrane	hypothetical protein	CBO0903	-0.408555	0.00408567	0.0370583	-1.58531	8.31e-09	6.74e-08
CBO0904	CAL82456	1.5.0	Transport/binding proteins	Transport/binding proteins	ABC transporter ATP-binding protein/permease	CBO0904	0.316255	0.147214	0.44827	0.283567	0.0676099	0.124895
CBO0905	CAL82457	6.1.02	Regulation	Response regulator	DNA-binding response regulator	CBO0905	0.155793	0.28758	0.635447	0.18716	0.216518	0.329951
CBO0906	CAL82458	6.1.01	Regulation	Sensor kinase	two component sensor kinase	CBO0906	0.0627618	0.620451	0.868492	-0.343967	0.0125353	0.0280809
CBO0907	CAL82459	4.1.06	Cell envelope	G+ membrane	BioY family protein	CBO0907	0.168745	0.244113	0.588022	1.15837	6.62e-07	3.45e-06
CBO0908	CAL82460	0.0.0	Unknown function	Unknown function, no known homologues	hypothetical protein	CBO0908	0.116835	0.361141	0.706003	0.0552167	0.663287	0.764865
CBO0909	CAL82461	7.0.0	Not classified	Not classified (included putative assignments)	GNAT family acetyltransferase	CBO0909	-0.745619	1.86306e-05	0.00054194	0.0591427	0.657902	0.76072
CBO0910	CAL82462	2.1.04	Macromolecule degradation	Degradation of proteins, peptides, glycoproteins	LexA repressor	CBO0910	-0.557818	0.00551239	0.0460204	-0.592376	0.00366215	0.00919451
CBO0911	CAL82463	2.2.03	Macromolecule synthesis, modification	DNA - replication, repair, restriction/modification	adenosylcobinamide kinase	cobU, CBO0911	0.208763	0.189641	0.514336	0.39426	0.00691059	0.0163512
CBO0912	CAL82464	0.0.0	Unknown function	Unknown function, no known homologues	hypothetical protein	CBO0912	0.0189853	0.869536	0.965731	0.0945071	0.413852	0.543367
CBO0913	CAL82465	6.3.12	Regulation	MerR	MerR family transcriptional regulator	CBO0913	0.0726757	0.659723	0.886369	-0.0908217	0.513985	0.637097
CBO0914	CAL82466	3.2.03	Biosynthesis of cofactors, carriers	Cobalamin	cobyric acid synthase	cobQ, cbiP, CBO0914	-1.9304	1.39347e-07	1.22508e-05	-4.21822	9.26e-12	2.04e-10
CBO0915	CAL82467	3.2.03	Biosynthesis of cofactors, carriers	Cobalamin	cobalamin biosynthesis protein	cbiB, CBO0915	-0.534194	0.0101374	0.0734645	-3.7484	6.1e-13	2.26e-11
CBO0916	CAL82468	3.2.03	Biosynthesis of cofactors, carriers	Cobalamin	aminotransferase	cobD, CBO0916	-1.11113	9.14096e-06	0.000305417	-3.46475	1.21e-13	6.32e-12
CBO0917	CAL82469	1.5.02	Transport/binding proteins	Cations	cobalt transport protein CbiM	cbiM, CBO0917A	-0.446279	0.0266544	0.148928	-2.24538	2.48e-10	3.22e-09
CBO0917A	CAL82470	1.5.02	Transport/binding proteins	Cations	cobalt ABC transporter permease	cbiN, CBO0917A	-0.126535	0.481626	0.79791	-1.54975	5.69e-07	3.01e-06
CBO0918	CAL82471	1.5.02	Transport/binding proteins	Cations	cobalt ABC transporter permease	cbiQ, CBO0918	0.043082	0.873178	0.966873	-2.72215	2.69e-10	3.43e-09
CBO0919	CAL82472	3.2.06	Biosynthesis of cofactors, carriers	Heme, porphyrin	precorrin-2 dehydrogenase	CBO0919	-0.587424	0.00372086	0.0344442	-2.53899	1.42e-11	2.9e-10
CBO0920	CAL82473	3.2.06	Biosynthesis of cofactors, carriers	Heme, porphyrin	porphobilinogen deaminase	hemC, popE, CBO0920	-0.0765295	0.745745	0.922882	-3.17831	2.38e-12	6.8e-11
CBO0921	CAL82474	3.2.06	Biosynthesis of cofactors, carriers	Heme, porphyrin	uroporphyrinogen III synthase/methyltransferase	hemD, CBO0921	0.14576	0.590379	0.855235	-2.21527	9.79e-08	6.08e-07
CBO0922	CAL82475	0.0.02	Unknown function	Conserved in other than E.coli	hypothetical protein	CBO0922	0.0954366	0.434648	0.76431	-3.48231	1.4e-15	1.89e-13
CBO0923	CAL82476	3.2.06	Biosynthesis of cofactors, carriers	Heme, porphyrin	delta-aminolevulinic acid dehydratase	hemB, CBO0923	-0.506039	0.00417361	0.0375959	-3.94298	1.99e-16	4.35e-14
CBO0924	CAL82477	3.2.03	Biosynthesis of cofactors, carriers	Cobalamin	cobyrinic acid a,c-diamide synthase	cobB, cbiA, CBO0924	-0.165077	0.355332	0.70089	-2.22459	9.93e-11	1.48e-09
CBO0925	CAL82478	3.2.03	Biosynthesis of cofactors, carriers	Cobalamin	precorrin-8X methylmutase	cobH, cbiC, CBO0925	0.171824	0.268899	0.617426	-3.16406	3.73e-13	1.58e-11
CBO0926	CAL82479	2.1.04	Macromolecule degradation	Degradation of proteins, peptides, glycoproteins	CAAX amino terminal protease	CBO0926	0.353829	0.0214364	0.128317	0.795835	3.07e-05	0.000114428
CBO0927	CAL82480	7.0.0	Not classified	Not classified (included putative assignments)	hypothetical protein	CBO0927	0.709759	0.000341524	0.00561606	0.703754	2.92e-05	0.000109483
CBO0928	CAL82481	7.0.0	Not classified	Not classified (included putative assignments)	phosphohydrolase	CBO0928	0.627692	0.00550728	0.0460021	-0.893908	0.000450026	0.00136508
CBO0929	CAL82482	0.0.02	Unknown function	Conserved in other than E.coli	hypothetical protein	CBO0929	0.672239	0.000977064	0.0124402	-1.75601	3.6e-07	1.98e-06
CBO0930	CAL82483	6.3.12	Regulation	MerR	MerR family transcriptional regulator	CBO0930	0.391801	0.0742575	0.299816	-1.80079	8.75e-07	4.46e-06
CBO0931	CAL82484	7.0.0	Not classified	Not classified (included putative assignments)	GNAT family acetyltransferase	CBO0931	0.230765	0.586374	0.852765	-1.85405	2.98e-10	3.74e-09
CBO0932	CAL82485	0.0.02	Unknown function	Conserved in other than E.coli	hypothetical protein	CBO0932	0.34551	0.0328703	0.172731	-1.5639	2.9e-09	2.67e-08
CBO0933	CAL82486	7.0.0	Not classified	Not classified (included putative assignments)	nitroreductase	CBO0933	0.640425	0.0085715	0.0651012	-1.22848	5.86e-08	3.81e-07
CBO0934	CAL82487	4.1.06	Cell envelope	G+ membrane	hypothetical protein	CBO0934	0.660426	0.00827061	0.0634282	0.397229	0.0921697	0.163121
CBO0935	CAL82488	0.0.02	Unknown function	Conserved in other than E.coli	hypothetical protein	CBO0935	0.690206	0.00117833	0.0143747	-1.2983	1.53e-06	7.39e-06
CBO0936	CAL82489	3.2.03	Biosynthesis of cofactors, carriers	Cobalamin	cobalt-precorrin-6A synthase	cbiD, CBO0936	0.363539	0.0266825	0.149007	-1.2004	1.98e-07	1.15e-06
CBO0937	CAL82490	3.2.03	Biosynthesis of cofactors, carriers	Cobalamin	precorrin-6y C5,15-methyltransferase subunit CbiE	cbiE, CBO0937	-0.0762325	0.557298	0.837638	-1.84668	4.3e-10	5.17e-09
CBO0938	CAL82491	2.1.04	Macromolecule degradation	Degradation of proteins, peptides, glycoproteins	CAAX amino terminal protease	CBO0938	0.465714	0.0148232	0.0972374	-0.571792	0.000536681	0.00160383
CBO0939	CAL82492	3.2.03	Biosynthesis of cofactors, carriers	Cobalamin	precorrin-6Y C5,15-methyltransferase subunit CbiT	cbiT, CBO0939	0.58627	0.00099603	0.0126306	-0.648576	0.000960631	0.00273131
CBO0940	CAL82493	4.1.07	Cell envelope	G+ exported/lipoprotein	hypothetical protein	CBO0940	0.953716	3.16645e-05	0.000846017	-0.740067	0.00047936	0.00144765
CBO0941	CAL82494	4.1.06	Cell envelope	G+ membrane	hypothetical protein	CBO0941	0.783137	0.000815983	0.0109541	-0.466257	0.0210297	0.0446438
CBO0941A	CAL82495	4.1.06	Cell envelope	G+ membrane	hypothetical protein	CBO0941A	0.176832	0.138542	0.434309	-0.0884448	0.404215	0.533697
CBO0942	CAL82496	4.1.06	Cell envelope	G+ membrane	hypothetical protein	CBO0942	0.423689	0.0154493	0.100382	-0.159932	0.327624	0.457035
CBO0943	CAL82497	4.1.06	Cell envelope	G+ membrane	hypothetical protein	CBO0943	0.929098	6.39715e-06	0.000227765	-1.00338	3.74e-06	1.66e-05
CBO0944	CAL82498	4.1.06	Cell envelope	G+ membrane	hypothetical protein	CBO0944	0.538055	0.00955499	0.0704294	-1.37504	0.000184249	0.000602061
CBO0945	CAL82499	7.0.0	Not classified	Not classified (included putative assignments)	isochorismatase	CBO0945	0.718515	0.0019678	0.0211237	-1.0511	4.64e-05	0.000168211
CBO0946	CAL82500	3.2.03	Biosynthesis of cofactors, carriers	Cobalamin	cobalt-precorrin-2 C(20)-methyltransferase	cbiL, CBO0946	0.585415	0.0154444	0.100382	-1.28121	6.57e-07	3.43e-06
CBO0947	CAL82501	3.2.03	Biosynthesis of cofactors, carriers	Cobalamin	precorrin-4 C(11)-methyltransferase	cbiF, CBO0947	0.54207	0.0029036	0.0284343	-1.32867	7.99e-07	4.11e-06
CBO0948	CAL82502	3.2.03	Biosynthesis of cofactors, carriers	Cobalamin	cobalamin biosynthesis protein CbiG	cbiG, CBO0948	-0.285123	0.110599	0.383538	-1.11443	3.95e-07	2.16e-06
CBO0949	CAL82503	3.2.03	Biosynthesis of cofactors, carriers	Cobalamin	precorrin-3B C(17)-methyltransferase	cbiH, CBO0949	-0.427716	0.00767554	0.0597663	-1.67868	1.8e-08	1.33e-07
CBO0950	CAL82504	3.2.03	Biosynthesis of cofactors, carriers	Cobalamin	cobalt-precorrin-6x reductase	cbiJ, CBO0950	-0.369781	0.286161	0.634627	-2.69472	1.65e-11	3.3e-10
CBO0951	CAL82505	1.5.0	Transport/binding proteins	Transport/binding proteins	hypothetical protein	CBO0951	-0.159653	0.362465	0.707267	-1.72707	1.13e-07	6.93e-07
CBO0952	CAL82506	3.2.03	Biosynthesis of cofactors, carriers	Cobalamin	anaerobic sirohydrochlorin cobaltochelatase	cbiK, CBO0952	-0.309804	0.0357029	0.18275	-2.38551	1.19e-08	9.23e-08
CBO0953	CAL82507	3.4.03	Degradation of small molecules	Carbon compounds	kinase	pduX, CBO0953	-0.458782	0.00257682	0.0259945	-1.00703	8.31e-06	3.44e-05
CBO0954	CAL82508	3.2.03	Biosynthesis of cofactors, carriers	Cobalamin	cob(I)yrinic acid a,c-diamide adenosyltransferase	cobA, btuR, CBO0954	-0.200549	0.145396	0.445055	-1.59414	2.18e-07	1.25e-06
CBO0955	CAL82509	6.5.0	Regulation	Others	CRP family transcriptional regulator	CBO0955	0.0637249	0.652846	0.883544	-1.8262	2.72e-09	2.52e-08
CBO0956	CAL82510	1.5.04	Transport/binding proteins	Anions	formate/nitrate transporter	nirC, CBO0956	0.0113788	0.923959	0.981744	-0.0319863	0.768893	0.845498
CBO0957	CAL82511	3.3.19	Central intermediary metabolism	Sulfur metabolism	anaerobic sulfite reductase subunit A	asrA, CBO0957	0.0891215	0.519929	0.817822	-0.228006	0.10709	0.184907
CBO0958	CAL82512	3.3.19	Central intermediary metabolism	Sulfur metabolism	anaerobic sulfite reductase subunit B	asrB, CBO0958	-0.112236	0.47179	0.791531	0.359798	0.221766	0.336055
CBO0959	CAL82513	3.3.19	Central intermediary metabolism	Sulfur metabolism	anaerobic sulfite reductase subunit C	asrC, CBO0959	0.0842849	0.544866	0.831996	0.167134	0.236498	0.354131
CBO0960	CAL82514	3.2.09	Biosynthesis of cofactors, carriers	Molybdopterin	molybdopterin biosynthesis protein	CBO0960	0.468925	0.00943195	0.0697185	1.96849	1.12e-11	2.37e-10
CBO0961	CAL82515	1.5.02	Transport/binding proteins	Cations	molybdate-binding periplasmic protein precursor	modA, CBO0961	0.332901	0.0712555	0.291486	0.957028	0.0377188	0.0748809
CBO0962	CAL82516	1.5.02	Transport/binding proteins	Cations	molybdenum ABC transporter permease	modB, CBO0962	0.676068	0.00369365	0.0342326	2.81994	3.5e-12	9.08e-11
CBO0963	CAL82517	1.5.02	Transport/binding proteins	Cations	molybdenum ABC transporter ATP-binding protein	CBO0963	0.987771	6.12142e-06	0.000219437	2.54894	4.91e-13	1.89e-11
CBO0964	CAL82518	4.1.06	Cell envelope	G+ membrane	hypothetical protein	CBO0964	0.626934	0.00363243	0.0337647	1.77222	1.55e-08	1.17e-07
CBO0965	CAL82519	4.1.06	Cell envelope	G+ membrane	hypothetical protein	CBO0965	0.121365	0.287095	0.635447	-0.100731	0.374698	0.505454
CBO0966	CAL82520	4.1.06	Cell envelope	G+ membrane	hypothetical protein	CBO0966	0.581776	0.045094	0.213942	1.08574	1.68e-05	6.56e-05
CBO0967	CAL82521	1.5.0	Transport/binding proteins	Transport/binding proteins	ABC transporter ATP-binding protein	CBO0967	0.448945	0.0021131	0.022348	1.8648	2.06e-08	1.51e-07
CBO0968	CAL82522	1.5.0	Transport/binding proteins	Transport/binding proteins	hypothetical protein	CBO0968	0.378705	0.020567	0.124582	1.04433	2.79e-06	1.28e-05
CBO0970	CAL82523	6.1.02	Regulation	Response regulator	DNA-binding response regulator	CBO0970	-0.210818	0.203447	0.533286	0.330652	0.0970944	0.170457
CBO0971	CAL82524	6.1.01	Regulation	Sensor kinase	sensor histidine kinase	CBO0971	-0.116893	0.380717	0.721848	0.445271	0.0123957	0.0278077
CBO0972	CAL82525	1.6.03	Adaptation	Fe storage	iron ABC transporter ATP-binding protein	fecE, CBO0972	0.280626	0.357012	0.702814	-1.40185	1.93e-08	1.42e-07
CBO0973	CAL82526	1.6.03	Adaptation	Fe storage	iron chelate uptake ABC transporter FeCT family, permease	CBO0973	-0.317887	0.139927	0.436863	-2.97788	6.1e-11	9.87e-10
CBO0974	CAL82527	1.6.03	Adaptation	Fe storage	iron chelate uptake ABC transporter solute-binding protein	CBO0974	-0.0701092	0.724922	0.915504	0.285622	0.270769	0.393416
CBO0975	CAL82528	3.3.08	Central intermediary metabolism	Misc. glycerol metabolism	dihydroxyacetone kinase	dhaK, CBO0975	-0.110933	0.506858	0.809351	-0.32912	0.0592484	0.111251
CBO0976	CAL82529	3.3.08	Central intermediary metabolism	Misc. glycerol metabolism	glycerol dehydrogenase	gldA, CBO0976	0.138	0.231714	0.57242	-0.265176	0.0422046	0.082794
CBO0977	CAL82530	6.3.02	Regulation	AraC	AraC-family transcriptional regulator	CBO0977	-0.59229	0.0499799	0.229511	0.105297	0.53565	0.656863
CBO0979	CAL82531	0.0.02	Unknown function	Conserved in other than E.coli	hypothetical protein	CBO0979	-0.180513	0.190777	0.515852	-0.344462	0.108992	0.18772
CBO0980	CAL82532	7.0.0	Not classified	Not classified (included putative assignments)	GNAT family acetyltransferase	CBO0980	-0.305367	0.07878	0.311811	-0.498574	0.000478559	0.00144551
CBO0981	CAL82533	7.0.0	Not classified	Not classified (included putative assignments)	GNAT family acetyltransferase	CBO0981	-0.468763	0.0032509	0.0309494	-1.4904	6.3e-09	5.28e-08
CBO0982	CAL82534	0.0.02	Unknown function	Conserved in other than E.coli	hypothetical protein	CBO0982	-0.303087	0.0390116	0.192816	-0.721079	3.22e-05	0.000119519
CBO0983	CAL82535	0.0.0	Unknown function	Unknown function, no known homologues	hypothetical protein	CBO0983	-0.142898	0.392809	0.73133	-0.408901	0.0530395	0.100978
CBO0984	CAL82536	3.4.03	Degradation of small molecules	Carbon compounds	oxidoreductase, aldo/keto reductase	dkgA, CBO0984	0.0100694	0.962163	0.990931	0.731154	0.00108742	0.00306076
CBO0985	CAL82537	0.0.02	Unknown function	Conserved in other than E.coli	TfoX domain-containing protein	CBO0985	0.085045	0.615488	0.866052	-0.417265	0.0138348	0.0307164
CBO0986	CAL82538	7.0.0	Not classified	Not classified (included putative assignments)	GNAT family acetyltransferase	CBO0986	0.236705	0.260063	0.606699	0.639856	0.00544103	0.0131489
CBO0987	CAL82539	6.3.14	Regulation	PadR	PadR-family transcriptional regulator	CBO0987	-0.384804	0.0264413	0.148133	-1.20513	4.17e-07	2.27e-06
CBO0988	CAL82540	4.1.06	Cell envelope	G+ membrane	hypothetical protein	CBO0988	-1.02533	8.67705e-07	5.04894e-05	-1.80906	3.41e-11	6.01e-10
CBO0989	CAL82541	4.1.07	Cell envelope	G+ exported/lipoprotein	hypothetical protein	CBO0989	-1.01176	8.61417e-05	0.0018621	-2.71412	4.7e-11	7.9e-10
CBO0990	CAL82542	0.0.0	Unknown function	Unknown function, no known homologues	hypothetical protein	CBO0990	-0.118719	0.497056	0.804668	0.054587	0.737442	0.821559
CBO0991	CAL82543	3.3.11	Central intermediary metabolism	Nucleotide interconversions	adenosine deaminase	add, CBO0991	0.294069	0.173681	0.491234	0.716741	0.00272905	0.00706249
CBO0992	CAL82544	4.1.06	Cell envelope	G+ membrane	phage infection protein	CBO0992	0.788592	0.00348741	0.0328238	0.125148	0.60254	0.715042
CBO0993	CAL82545	4.1.06	Cell envelope	G+ membrane	phage infection protein	CBO0993	0.582962	0.0126815	0.0868446	0.79401	0.00136689	0.00375864
CBO0993A	CAL82546	4.1.06	Cell envelope	G+ membrane	hypothetical protein	CBO0993A	-0.380238	0.108499	0.379264	-0.486711	0.0010212	0.00288417
CBO0994	CAL82547	4.1.06	Cell envelope	G+ membrane	hypothetical protein	CBO0994	-0.155227	0.30678	0.656073	-0.123021	0.441812	0.569574
CBO0995	CAL82548	2.2.03	Macromolecule synthesis, modification	DNA - replication, repair, restriction/modification	ATP-dependent DNA helicase RecQ	recQ, CBO0995	-0.27546	0.0838453	0.323877	-1.41061	4.97e-08	3.29e-07
CBO0996	CAL82549	7.0.0	Not classified	Not classified (included putative assignments)	ferritin	CBO0996	-0.351834	0.0458444	0.216393	-1.69876	1.76e-09	1.74e-08
CBO0997	CAL82550	7.0.0	Not classified	Not classified (included putative assignments)	phosphodiesterase	CBO0997	-0.204449	0.216289	0.551501	-1.06489	2.59e-08	1.85e-07
CBO0998	CAL82551	6.1.02	Regulation	Response regulator	response regulator	CBO0998	-0.632906	0.0667743	0.279178	-1.39015	0.000416699	0.00127307
CBO0999	CAL82552	0.0.02	Unknown function	Conserved in other than E.coli	hypothetical protein	CBO0999	0.146477	0.337885	0.684429	0.410592	0.0740907	0.135059
CBO1000	CAL82553	0.0.02	Unknown function	Conserved in other than E.coli	hypothetical protein	CBO1000	0.144403	0.404451	0.74042	-0.895067	0.000140789	0.000469408
CBO1001	CAL82554	4.1.06	Cell envelope	G+ membrane	hypothetical protein	CBO1001	0.174785	0.311576	0.66095	-0.558259	0.00170309	0.00459796
CBO1002	CAL82555	3.3.11	Central intermediary metabolism	Nucleotide interconversions	anaerobic ribonucleoside-triphosphate reductase activating protein	nrdG, CBO1002	0.359948	0.0303241	0.16326	-0.675233	0.000317475	0.000990896
CBO1003	CAL82556	7.0.0	Not classified	Not classified (included putative assignments)	ATPase AAA	CBO1003	-0.145913	0.324923	0.674321	-1.79201	1.15e-11	2.42e-10
CBO1004	CAL82557	0.0.0	Unknown function	Unknown function, no known homologues	hypothetical protein	CBO1004	-0.420586	0.0221644	0.131326	-1.65939	7.39e-09	6.07e-08
CBO1005	CAL82558	1.5.03	Transport/binding proteins	Carbohydrates, organic acids and alcohols	L-lactate permease	glcA, CBO1005	-0.121172	0.523333	0.819131	2.20439	3.6e-10	4.41e-09
CBO1006	CAL82559	0.0.02	Unknown function	Conserved in other than E.coli	hypothetical protein	CBO1006	0.152146	0.537793	0.827054	2.03683	4e-08	2.71e-07
CBO1007	CAL82560	3.5.03	Energy metabolism, carbon	Electron transport	electron transfer flavoprotein subunit beta/FixA family protein	etfB, CBO1007	0.045091	0.710716	0.907909	1.99425	9.81e-13	3.28e-11
CBO1008	CAL82561	3.5.03	Energy metabolism, carbon	Electron transport	electron transfer flavoprotein subunit alpha/FixB family protein	etfB, CBO1008	0.055212	0.799201	0.943372	1.82253	1.1e-09	1.16e-08
CBO1009	CAL82562	3.4.03	Degradation of small molecules	Carbon compounds	glycolate oxidase	glcD, gox, CBO1009	-0.0605774	0.65528	0.884027	1.45991	1.33e-09	1.37e-08
CBO1010	CAL82563	0.0.0	Unknown function	Unknown function, no known homologues	hypothetical protein (gene fragment)	CBO1010	-0.144755	0.227016	0.566221	-1.15683	9.43e-07	4.76e-06
CBO1011	CAL82564	4.1.07	Cell envelope	G+ exported/lipoprotein	lipoprotein	CBO1011	-0.0853907	0.522668	0.818897	-1.1071	4.49e-09	3.93e-08
CBO1012	CAL82565	6.3.07	Regulation	MarR	MarR family transcriptional regulator	CBO1012	-0.53806	0.0251706	0.143883	-2.66365	9.6e-10	1.03e-08
CBO1013	CAL82566	7.0.0	Not classified	Not classified (included putative assignments)	cyclase	CBO1013	-0.197232	0.165627	0.477462	-1.06484	2.62e-07	1.48e-06
CBO1014	CAL82567	3.3.20	Central intermediary metabolism	Amino acids	aspartate aminotransferase	CBO1014	0.408958	0.0231152	0.13543	1.08844	3.31e-06	1.49e-05
CBO1015	CAL82568	7.0.0	Not classified	Not classified (included putative assignments)	cyclase	CBO1015	-0.0462799	0.736008	0.919389	0.259237	0.140679	0.231842
CBO1016	CAL82569	6.3.07	Regulation	MarR	MarR family transcriptional regulator	CBO1016	-0.254511	0.169023	0.482743	-0.495294	0.0124327	0.0278708
CBO1017	CAL82570	6.3.12	Regulation	MerR	MerR family transcriptional regulator	CBO1017	-0.123751	0.541152	0.829757	0.560432	0.0057872	0.0139064
CBO1018	CAL82571	0.0.02	Unknown function	Conserved in other than E.coli	B3/4 domain-containing protein	CBO1018	0.162165	0.689776	0.89971	0.812373	9.19e-06	3.77e-05
CBO1019	CAL82572	2.2.01	Macromolecule synthesis, modification	Amino acyl tRNA synthesis; tRNA modification	aspartyl-tRNA synthetase	aspC, CBO1019	0.791006	0.0178264	0.111323	1.62441	4.11e-09	3.62e-08
CBO1020	CAL82573	4.1.07	Cell envelope	G+ exported/lipoprotein	hypothetical protein	CBO1020	-0.225326	0.128308	0.416068	-0.215578	0.178105	0.281948
CBO1021	CAL82574	6.3.08	Regulation	TetR	TetR family transcriptional regulator	CBO1021	-0.182267	0.156389	0.46427	-0.869615	0.000176747	0.000579955
CBO1022	CAL82575	7.0.0	Not classified	Not classified (included putative assignments)	hypothetical protein	CBO1022	-0.199722	0.25489	0.599135	-0.877966	5.67e-05	0.000202041
CBO1023	CAL82576	7.0.0	Not classified	Not classified (included putative assignments)	HAD-superfamily hydrolase	CBO1023	-0.330479	0.290787	0.63921	0.668104	0.00118275	0.00330428
CBO1024	CAL82577	6.5.0	Regulation	Others	cyclic nucleotide-binding regulatory protein	CBO1024	-0.782127	0.00031965	0.00534572	-0.284442	0.126983	0.212997
CBO1025	CAL82578	2.1.04	Macromolecule degradation	Degradation of proteins, peptides, glycoproteins	DJ-1/PfpI family protein	CBO1025	0.121494	0.381424	0.721971	0.136959	0.21814	0.331518
CBO1026	CAL82579	6.3.06	Regulation	LysR	LysR family transcriptional regulator	CBO1026	-0.238794	0.204357	0.534748	0.818005	7.14e-05	0.000249992
CBO1027	CAL82580	0.0.02	Unknown function	Conserved in other than E.coli	hypothetical protein	CBO1027	0.0391482	0.818071	0.948849	1.20792	5.02e-06	2.18e-05
CBO1028	CAL82581	1.6.03	Adaptation	Fe storage	ferrous iron transport protein	CBO1028	1.71905	2.37003e-05	0.000666393	5.02006	2.95e-11	5.37e-10
CBO1029	CAL82582	1.6.03	Adaptation	Fe storage	ferrous iron transport protein A	feoA, CBO1029	1.79713	3.30571e-06	0.000141199	5.28028	2.54e-14	1.86e-12
CBO1030	CAL82583	1.6.03	Adaptation	Fe storage	ferrous iron transport protein B	feoB, CBO1030	0.583581	0.0163892	0.104844	6.10763	1.05e-16	2.64e-14
CBO1031	CAL82584	4.1.06	Cell envelope	G+ membrane	hypothetical protein	CBO1031	0.861093	0.000609593	0.00877691	4.24608	9.77e-15	8.79e-13
CBO1032	CAL82585	7.0.0	Not classified	Not classified (included putative assignments)	acetyltransferase	CBO1032	-0.806279	0.00110173	0.0136197	-0.73627	0.00235202	0.0061741
CBO1033	CAL82586	4.1.09	Cell envelope	G+ peptidoglycan, teichoic acid	D-alanyl-D-alanine carboxypeptidase	CBO1033	0.0712718	0.715224	0.910647	0.738541	0.000494602	0.00148854
CBO1034	CAL82587	1.8.01	Differentiation/sporulation/Germination	Differentiation/sporulation/Germination	small acid-soluble spore protein Tlp	tlp, tlpA, CBO1034	-0.0451493	0.685908	0.898031	-0.192256	0.174872	0.277528
CBO1035	CAL82588	6.1.02	Regulation	Response regulator	DNA-binding response regulator	CBO1035	0.349402	0.0234372	0.136908	0.813692	5.98e-05	0.000212506
CBO1036	CAL82589	6.1.01	Regulation	Sensor kinase	sensor histidine kinase	CBO1036	0.231978	0.17834	0.498407	0.346092	0.0181397	0.0391691
CBO1037	CAL82590	0.0.0	Unknown function	Unknown function, no known homologues	hypothetical protein	CBO1037	0.070048	0.5168	0.815899	0.126228	0.418977	0.548265
CBO1038	CAL82591	3.2.06	Biosynthesis of cofactors, carriers	Heme, porphyrin	cytochrome P450	cypC, CBO1038	0.0879549	0.48209	0.798218	0.0822556	0.510575	0.634268
CBO1039	CAL82592	1.5.05	Transport/binding proteins	Other	heavy metal-associated domain-containing protein	CBO1039	0.0511786	0.769807	0.931179	0.177768	0.236347	0.353978
CBO1040	CAL82593	4.1.06	Cell envelope	G+ membrane	hypothetical protein	CBO1040	0.13485	0.360805	0.705603	0.542809	0.00130903	0.00362043
CBO1041	CAL82594	6.1.02	Regulation	Response regulator	DNA-binding response regulator	CBO1041	-0.0271724	0.827966	0.951518	-0.176558	0.144611	0.237297
CBO1042	CAL82595	6.1.01	Regulation	Sensor kinase	sensor histidine kinase	CBO1042	0.126287	0.298307	0.648406	-0.0709801	0.650551	0.754563
CBO1043	CAL82596	0.0.02	Unknown function	Conserved in other than E.coli	hypothetical protein	CBO1043	-0.0462817	0.732801	0.918206	0.690578	0.000287947	0.000906647
CBO1044	CAL82597	6.3.02	Regulation	AraC	AraC family transcriptional regulator	CBO1044	-0.0111763	0.939314	0.985697	0.994897	4.15e-06	1.83e-05
CBO1045	CAL82598	1.6.03	Adaptation	Fe storage	iron chelate uptake ABC transporter FeCT family, permease	CBO1045	-0.129959	0.506087	0.809161	0.287243	0.150616	0.245493
CBO1045A	CAL82599	1.6.03	Adaptation	Fe storage	iron ABC transporter permease	CBO1045A	-0.0413502	0.745027	0.922882	-0.167261	0.359185	0.489521
CBO1046	CAL82600	1.6.03	Adaptation	Fe storage	iron ABC transporter ATP-binding protein	CBO1046	-0.0808541	0.577206	0.8494	0.106364	0.416774	0.545837
CBO1047	CAL82601	1.6.03	Adaptation	Fe storage	iron ABC transporter substrate-binding protein	CBO1047	0.0636016	0.673239	0.890853	-0.309631	0.0321129	0.0650066
CBO1048	CAL82602	0.0.0	Unknown function	Unknown function, no known homologues	hypothetical protein	CBO1048	-0.0985288	0.529797	0.822695	0.604182	0.000251555	0.000801197
CBO1049	CAL82603	6.3.02	Regulation	AraC	AraC family transcriptional regulator	CBO1049	0.334307	0.0417779	0.202544	2.3412	1.84e-11	3.6e-10
CBO1050	CAL82604	1.5.0	Transport/binding proteins	Transport/binding proteins	ABC transporter permease ATP-binding protein	CBO1050	-0.229874	0.176258	0.49517	0.138884	0.345217	0.475421
CBO1051	CAL82605	1.5.0	Transport/binding proteins	Transport/binding proteins	ABC transporter ATP-binding protein	CBO1051	-0.0917199	0.582305	0.85122	-0.138349	0.436523	0.565071
CBO1052	CAL82606	6.1.01	Regulation	Sensor kinase	sensor histidine kinase	CBO1052	-0.0734854	0.738869	0.92062	-0.174476	0.207203	0.318962
CBO1053	CAL82607	6.1.02	Regulation	Response regulator	DNA-binding response regulator	CBO1053	-0.142717	0.28468	0.634062	-0.299056	0.0823721	0.147928
CBO1054	CAL82608	0.0.02	Unknown function	Conserved in other than E.coli	hypothetical protein	CBO1054	0.0915524	0.608459	0.86457	-1.13495	3.56e-06	1.6e-05
CBO1055	CAL82609	7.0.0	Not classified	Not classified (included putative assignments)	putative glycosyltransferase (gene fragment)	CBO1055	-0.0991566	0.460286	0.782842	-0.134406	0.333294	0.463415
CBO1056	CAL82610	4.1.03	Cell envelope	Outer membrane constituents	cell surface protein	CBO1056	0.247591	0.199193	0.527821	0.121852	0.520477	0.642966
CBO1057	CAL82611	2.1.03	Macromolecule degradation	Degradation of polysaccharides	extracellular exochitinase	chiD, CBO1057	-0.19905	0.323685	0.67323	-0.131901	0.415279	0.544511
CBO1058	CAL82612	0.0.02	Unknown function	Conserved in other than E.coli	hypothetical protein	CBO1058	0.082629	0.528437	0.822396	-0.195387	0.107167	0.185003
CBO1059	CAL82613	4.1.06	Cell envelope	G+ membrane	hypothetical protein	CBO1059	-0.0395484	0.780971	0.935456	0.448534	0.00475792	0.0116447
CBO1060	CAL82614	0.0.02	Unknown function	Conserved in other than E.coli	hypothetical protein	CBO1060	-0.0628464	0.709517	0.90758	0.106485	0.529371	0.651092
CBO1061	CAL82615	2.1.04	Macromolecule degradation	Degradation of proteins, peptides, glycoproteins	CAAX amino terminal protease	CBO1061	-0.163272	0.584315	0.851897	-0.305254	0.311169	0.438709
CBO1062	CAL82616	7.0.0	Not classified	Not classified (included putative assignments)	metallo-beta-lactamase	CBO1062	-0.238224	0.148841	0.451485	-0.717425	8.42e-05	0.000291505
CBO1063	CAL82617	1.5.0	Transport/binding proteins	Transport/binding proteins	ABC transporter ATP-binding protein	CBO1063	-0.137768	0.270291	0.618354	-0.105302	0.396252	0.526051
CBO1064	CAL82618	4.1.06	Cell envelope	G+ membrane	hypothetical protein	CBO1064	1.25975	4.92142e-05	0.00120075	1.65933	9.28e-06	3.81e-05
CBO1065	CAL82619	0.0.02	Unknown function	Conserved in other than E.coli	ArsC family protein	CBO1065	-0.399062	0.0215331	0.128602	-1.58264	6.23e-09	5.23e-08
CBO1066	CAL82620	0.0.0	Unknown function	Unknown function, no known homologues	hypothetical protein	CBO1066	-0.226567	0.149212	0.45209	-0.80496	2.21e-05	8.44e-05
CBO1067	CAL82621	7.0.0	Not classified	Not classified (included putative assignments)	radical SAM domain protein	CBO1067	-0.182891	0.297646	0.647864	-1.54938	6.26e-07	3.28e-06
CBO1068	CAL82622	3.5.02	Energy metabolism, carbon	Anaerobic respiration	FAD-dependent oxidoreductase	glpA, CBO1068	1.01557	0.00595575	0.049071	2.30728	1.11e-06	5.47e-06
CBO1069	CAL82623	7.0.0	Not classified	Not classified (included putative assignments)	pyridine nucleotide-disulfide oxidoreductase	CBO1069	0.602329	0.114581	0.390629	1.58588	0.00034527	0.00107085
CBO1070	CAL82624	0.0.02	Unknown function	Conserved in other than E.coli	hypothetical protein	CBO1070	0.610928	0.00452512	0.0398729	1.9629	4.28e-10	5.15e-09
CBO1071	CAL82625	1.5.03	Transport/binding proteins	Carbohydrates, organic acids and alcohols	glycerol-3-phosphate transporter	glpT, CBO1071	0.158724	0.297557	0.647759	0.174103	0.25458	0.374984
CBO1072	CAL82626	2.2.01	Macromolecule synthesis, modification	Amino acyl tRNA synthesis; tRNA modification	arginyl-tRNA synthetase	argS, CBO1072	0.176308	0.337846	0.684429	-0.86209	0.000538689	0.00160861
CBO1073	CAL82627	3.4.02	Degradation of small molecules	Amino acids	transaminase	arcT, CBO1073	0.920634	0.000117516	0.00239285	0.954679	7.89e-05	0.00027407
CBO1074	CAL82628	0.0.02	Unknown function	Conserved in other than E.coli	hypothetical protein	CBO1074	0.776874	0.000388791	0.00616774	2.70321	6.36e-12	1.49e-10
CBO1075	CAL82629	0.0.0	Unknown function	Unknown function, no known homologues	hypothetical protein	CBO1075	-0.0244336	0.806442	0.945268	0.590179	0.00861552	0.0199591
CBO1076	CAL82630	1.6.03	Adaptation	Fe storage	ferrous iron transport protein B	feoB, CBO1076	0.463705	0.0185963	0.114809	4.68891	3.01e-16	6.04e-14
CBO1077	CAL82631	1.6.03	Adaptation	Fe storage	ferrous ion transport protein A	feoA, CBO1077	0.361278	0.483892	0.798838	3.41078	2.95e-11	5.37e-10
CBO1078	CAL82632	0.0.02	Unknown function	Conserved in other than E.coli	hypothetical protein	CBO1078	-0.0353382	0.777248	0.934296	1.23837	5.1e-07	2.72e-06
CBO1079	CAL82633	7.0.0	Not classified	Not classified (included putative assignments)	haloacid dehalogenase	CBO1079	0.0569576	0.717991	0.912168	1.60993	1.84e-09	1.8e-08
CBO1080	CAL82634	0.0.02	Unknown function	Conserved in other than E.coli	hypothetical protein	CBO1080	-0.0777918	0.692559	0.900079	0.218559	0.273445	0.39628
CBO1081	CAL82635	2.1.03	Macromolecule degradation	Degradation of polysaccharides	glycosyl hydrolase	CBO1081	-0.081951	0.640661	0.877797	-0.0296819	0.901415	0.936527
CBO1082	CAL82636	7.0.0	Not classified	Not classified (included putative assignments)	putative acetyltransferase (pseudogene)	CBO1082	0.351561	0.0497842	0.228955	-0.552501	0.00207434	0.00549652
CBO1084	CAL82637	1.5.01	Transport/binding proteins	Amino acids and amines	D-methionine ABC transporterATP-binding protein	metN1, CBO1084	-0.0769372	0.496693	0.804626	0.948634	6.57e-08	4.23e-07
CBO1085	CAL82638	1.5.01	Transport/binding proteins	Amino acids and amines	methionine ABC transporter permease	metI1, CBO1085	0.182369	0.153565	0.458915	0.930269	3.84e-07	2.1e-06
CBO1086	CAL82639	1.5.01	Transport/binding proteins	Amino acids and amines	lipoprotein, NLPA family	metQ1, CBO1086	0.125027	0.604061	0.861685	0.871318	0.000310926	0.000972191
CBO1087	CAL82640	1.5.01	Transport/binding proteins	Amino acids and amines	lipoprotein, NLPA family	metQ2, CBO1087	0.193766	0.227557	0.566924	0.51876	0.00089009	0.00254911
CBO1088	CAL82641	2.1.04	Macromolecule degradation	Degradation of proteins, peptides, glycoproteins	amidohydrolase	CBO1088	0.23352	0.128474	0.416264	0.234985	0.123267	0.207939
CBO1089	CAL82642	0.0.0	Unknown function	Unknown function, no known homologues	hypothetical protein	CBO1089	0.07614	0.453174	0.778134	-0.119746	0.243237	0.362088
CBO1090	CAL82643	0.0.02	Unknown function	Conserved in other than E.coli	hypothetical protein	CBO1090	0.799316	0.0017727	0.0195357	2.37946	1.08e-12	3.55e-11
CBO1091	CAL82644	6.3.03	Regulation	GntR	GntR family transcriptional regulator	CBO1091	0.657096	0.00123637	0.0148752	2.89337	9.23e-13	3.12e-11
CBO1092	CAL82645	4.1.06	Cell envelope	G+ membrane	hypothetical protein	CBO1092	0.185165	0.347788	0.694032	0.41355	0.0095307	0.0218988
CBO1093	CAL82646	4.1.07	Cell envelope	G+ exported/lipoprotein	hypothetical protein	CBO1093	0.0791713	0.592426	0.856731	-0.348247	0.0271445	0.0560882
CBO1094	CAL82647	2.2.01	Macromolecule synthesis, modification	Amino acyl tRNA synthesis; tRNA modification	glutamyl-tRNA synthetase	gltX, CBO1094	-0.533338	0.054988	0.24514	-1.65532	4.46e-06	1.95e-05
CBO1095	CAL82648	3.5.05	Energy metabolism, carbon	Glycolysis	glyceraldehyde-3-phosphate dehydrogenase, type I	gapA2, gap2, CBO1095	0.0748138	0.805616	0.945064	-0.544238	0.0853752	0.152641
CBO1096	CAL82649	4.1.09	Cell envelope	G+ peptidoglycan, teichoic acid	metallo-beta-lactamase	CBO1096	-0.448258	0.0139419	0.0926925	-0.847771	0.000132784	0.000444506
CBO1097	CAL82650	4.1.06	Cell envelope	G+ membrane	hypothetical protein	CBO1097	0.174327	0.320385	0.669109	0.475894	0.011833	0.026671
CBO1098	CAL82651	7.0.0	Not classified	Not classified (included putative assignments)	HD domain-containing protein	CBO1098	0.242038	0.119891	0.400369	0.372909	0.0213659	0.0452902
CBO1099	CAL82652	3.5.04	Energy metabolism, carbon	Fermentation	aldehyde dehydrogenase	aldH, CBO1099	0.331159	0.0308138	0.164826	0.950633	3.62e-06	1.62e-05
CBO1100	CAL82653	1.5.01	Transport/binding proteins	Amino acids and amines	sodium:alanine symporter	CBO1100	-0.051842	0.736765	0.919393	-0.702051	0.000399545	0.00122518
CBO1101	CAL82654	1.5.01	Transport/binding proteins	Amino acids and amines	sodium:alanine symporter	CBO1101	1.28064	3.84222e-06	0.000157284	2.87097	5.03e-11	8.34e-10
CBO1102	CAL82655	6.3.07	Regulation	MarR	MarR family transcriptional regulator	CBO1102	0.162134	0.309782	0.658642	0.510066	0.00393499	0.00981223
CBO1103	CAL82656	1.4.03	Protection responses	Drug/analogue sensitivity	MATE efflux family protein	CBO1103	0.87636	0.00441144	0.0391555	1.1274	5.39e-05	0.000192749
CBO1104	CAL82657	4.1.07	Cell envelope	G+ exported/lipoprotein	TPR domain protein	CBO1104	0.0263494	0.855293	0.961095	0.12539	0.390031	0.520868
CBO1105	CAL82658	0.0.02	Unknown function	Conserved in other than E.coli	hypothetical protein	CBO1105	0.14167	0.310067	0.658861	-0.142863	0.40583	0.535425
CBO1106	CAL82659	4.1.06	Cell envelope	G+ membrane	hypothetical protein	CBO1106	2.18888	2.04512e-06	9.78236e-05	2.61732	1.76e-11	3.47e-10
CBO1107	CAL82660	4.1.07	Cell envelope	G+ exported/lipoprotein	ABC transporter solute-binding protein	CBO1107	-1.37271	1.89276e-07	1.60142e-05	-2.10577	2.11e-10	2.78e-09
CBO1108	CAL82661	1.5.06	Transport/binding proteins		ABC transporter permease	potB, CBO1108	0.173856	0.308567	0.657859	-0.133976	0.304047	0.430813
CBO1109	CAL82662	1.5.06	Transport/binding proteins		ABC transporter permease	CBO1109	-0.179434	0.383031	0.722909	-0.423647	0.00734192	0.0172767
CBO1110	CAL82663	1.5.05	Transport/binding proteins	Other	ABC transporter ATP-binding protein	potA, CBO1110	0.0968068	0.587898	0.853626	-0.685743	0.000962425	0.00273536
CBO1111	CAL82664	0.0.02	Unknown function	Conserved in other than E.coli	hypothetical protein	CBO1111	0.206417	0.367651	0.712668	1.7485	3.42e-10	4.23e-09
CBO1112	CAL82665	7.0.0	Not classified	Not classified (included putative assignments)	GNAT family acetyltransferase	CBO1112	0.320701	0.0848534	0.326409	2.16209	1.98e-10	2.63e-09
CBO1113	CAL82666	3.2.15	Biosynthesis of cofactors, carriers	Thioredoxin, glutaredoxin, glutathione	hypothetical protein	CBO1113	0.281825	0.112701	0.387242	2.36067	2.22e-11	4.22e-10
CBO1114	CAL82667	4.1.06	Cell envelope	G+ membrane	hypothetical protein	CBO1114	0.431591	0.00936058	0.069366	1.91301	8.86e-12	1.96e-10
CBO1115	CAL82668	4.1.06	Cell envelope	G+ membrane	hypothetical protein	CBO1115	0.444997	0.0712029	0.291422	1.47404	3.99e-07	2.17e-06
CBO1116	CAL82669	3.4.03	Degradation of small molecules	Carbon compounds	maltose transacetylase	maa, CBO1116	0.499533	0.0127863	0.0874098	1.18298	3.19e-06	1.44e-05
CBO1117	CAL82670	3.2.02	Biosynthesis of cofactors, carriers	Biotin	bifunctional biotin operon repressor/biotin--[acetyl-CoA-carboxylase] synthetase	birA, CBO1117	0.0995539	0.663709	0.887773	0.859619	0.000128301	0.000431057
CBO1118	CAL82671	1.5.02	Transport/binding proteins	Cations	heavy metal-binding protein	CBO1118	0.0756754	0.541498	0.829945	-0.262686	0.101829	0.177404
CBO1119	CAL82672	6.5.0	Regulation	Others	hypothetical protein	CBO1119	0.221452	0.188743	0.513175	-1.14763	1.05e-06	5.22e-06
CBO1120	CAL82673	6.1.01	Regulation	Sensor kinase	sensor histidine kinase	CBO1120	-0.157149	0.247602	0.591815	-0.339881	0.0242662	0.0507613
CBO1121	CAL82674	0.0.02	Unknown function	Conserved in other than E.coli	hypothetical protein	CBO1121	-0.160554	0.403591	0.739728	0.13477	0.384019	0.514499
CBO1122	CAL82675	0.0.02	Unknown function	Conserved in other than E.coli	hypothetical protein	CBO1122	-0.428219	0.0178915	0.111552	-1.87205	5.51e-08	3.6e-07
CBO1123	CAL82676	0.0.0	Unknown function	Unknown function, no known homologues	hypothetical protein	CBO1123	-0.0504196	0.767395	0.929795	1.31981	2.31e-07	1.32e-06
CBO1124	CAL82677	1.5.02	Transport/binding proteins	Cations	magnesium transporter	CBO1124	-0.0976639	0.647734	0.881271	0.374858	0.105736	0.183014
CBO1126	CAL82678	3.1.17	Amino acid biosynthesis	Serine	class V aminotransferase	CBO1126	-0.322031	0.147726	0.449161	-0.341698	0.0235462	0.0494061
CBO1127	CAL82679	3.1.17	Amino acid biosynthesis	Serine	D-3-phosphoglycerate dehydrogenase	serA, CBO1127	-0.189995	0.26223	0.609469	0.117942	0.470135	0.597411
CBO1128	CAL82680	0.0.02	Unknown function	Conserved in other than E.coli	hypothetical protein	CBO1128	-0.319085	0.0236387	0.137749	-1.71394	1.08e-06	5.37e-06
CBO1129	CAL82681	1.4.02	Protection responses	Detoxification	metallo-beta-lactamase/flavodoxin domain-containing protein	norV, flrD, CBO1129	-0.538538	0.0464198	0.218192	-0.489032	0.0087271	0.0201968
CBO1130	CAL82682	7.0.0	Not classified	Not classified (included putative assignments)	CoA-substrate-specific enzyme activase	CBO1130	0.131785	0.338316	0.684771	-0.107379	0.409884	0.539238
CBO1131	CAL82683	1.6.02	Adaptation	Osmotic adaptation	choline/carnitine/betaine transporter	opuD, CBO1131	0.739046	0.000305602	0.00514358	3.3484	3.77e-14	2.54e-12
CBO1132	CAL82684	6.3.03	Regulation	GntR	glycine betaine uptake system transcriptional repressor	busR, CBO1132	-0.203662	0.143083	0.441623	0.497363	0.00142807	0.00391661
CBO1133	CAL82685	0.0.02	Unknown function	Conserved in other than E.coli	hypothetical protein	CBO1133	-0.158429	0.287883	0.635935	-0.889317	0.000468515	0.00141734
CBO1134	CAL82686	3.2.11	Biosynthesis of cofactors, carriers	Pyridine nucleotide	pyrazinamidase/nicotinamidase	pncA, nam, CBO1134	0.0694556	0.640632	0.877797	0.221282	0.0907262	0.160965
CBO1135	CAL82687	1.4.0	Protection responses	Protection responses	phage shock protein	pspE, CBO1135	0.321821	0.380797	0.721873	-0.45446	0.220464	0.334437
CBO1136	CAL82688	0.0.02	Unknown function	Conserved in other than E.coli	hypothetical protein	CBO1136	0.214536	0.110545	0.383437	0.981495	0.000789802	0.00228308
CBO1137	CAL82689	0.0.02	Unknown function	Conserved in other than E.coli	hypothetical protein	CBO1137	-0.086422	0.654086	0.883853	-0.115985	0.323892	0.452833
CBO1138	CAL82690	0.0.02	Unknown function	Conserved in other than E.coli	hypothetical protein	CBO1138	-0.788381	1.09719e-05	0.000353097	-0.990471	5.09e-07	2.71e-06
CBO1139	CAL82691	3.4.05	Degradation of small molecules	Other	xanthine phosphoribosyltransferase	xpt, CBO1139	-0.426785	0.0161747	0.103852	-1.39804	1.13e-06	5.58e-06
CBO1140	CAL82692	0.0.02	Unknown function	Conserved in other than E.coli	hypothetical protein	CBO1140	-0.110737	0.505343	0.809161	0.891142	2.57e-06	1.18e-05
CBO1141	CAL82693	1.4.02	Protection responses	Detoxification	thiosulfate sulfurtransferase	CBO1141	-0.399048	0.0844338	0.325225	-3.64393	3.56e-14	2.42e-12
CBO1142	CAL82694	4.1.06	Cell envelope	G+ membrane	hypothetical protein	CBO1142	-0.0399469	0.810868	0.946775	-0.299428	0.0603484	0.112979
CBO1143	CAL82695	4.1.06	Cell envelope	G+ membrane	transporter	CBO1143	-0.161917	0.382409	0.72262	0.350466	0.0490495	0.0944441
CBO1144	CAL82696	5.1.02	Laterally acquired elements	Phage-related functions and prophages	MazG family protein	CBO1144	-0.592886	0.00401091	0.0365276	-0.660846	0.00171743	0.0046343
CBO1145	CAL82697	0.0.02	Unknown function	Conserved in other than E.coli	hypothetical protein	CBO1145	-0.132246	0.329985	0.678509	0.914808	0.000259597	0.000823978
CBO1146	CAL82698	0.0.0	Unknown function	Unknown function, no known homologues	hypothetical protein	CBO1146	-0.105571	0.536948	0.82624	0.0678412	0.627919	0.736386
CBO1147	CAL82699	0.0.0	Unknown function	Unknown function, no known homologues	hypothetical protein	CBO1147	-0.449563	0.014536	0.0957126	-0.432804	0.018015	0.0389371
CBO1148	CAL82700	4.1.06	Cell envelope	G+ membrane	hypothetical protein	CBO1148	-0.0988563	0.449952	0.775963	-0.315121	0.0427327	0.0836621
CBO1149	CAL82701	1.5.0	Transport/binding proteins	Transport/binding proteins	ABC transporter ATP-binding protein	CBO1149	-0.201599	0.243984	0.587832	-1.8836	1.74e-09	1.73e-08
CBO1150	CAL82702	1.5.0	Transport/binding proteins	Transport/binding proteins	ABC transporter permease	CBO1150	0.149406	0.402035	0.73887	-0.826365	0.000126615	0.000425848
CBO1151	CAL82703	1.5.0	Transport/binding proteins	Transport/binding proteins	ABC transporter substrate-binding lipoprotein	CBO1151	-0.320023	0.0620239	0.265031	-2.44738	7.13e-11	1.12e-09
CBO1152	CAL82704	2.1.04	Macromolecule degradation	Degradation of proteins, peptides, glycoproteins	peptidase	CBO1152	-0.192855	0.302883	0.65263	-3.11561	6.06e-13	2.25e-11
CBO1153	CAL82705	1.6.03	Adaptation	Fe storage	ABC transporter substrate-binding protein	CBO1153	-0.185636	0.312115	0.661318	-2.71591	1.17e-12	3.74e-11
CBO1154	CAL82706	1.6.03	Adaptation	Fe storage	ABC transporter permease	CBO1154	0.101596	0.382061	0.722396	-0.989937	5.58e-06	2.4e-05
CBO1155	CAL82707	1.6.03	Adaptation	Fe storage	ABC transporter ATP-binding protein	CBO1155	0.185509	0.287922	0.635935	-0.437164	0.016502	0.0360283
CBO1156	CAL82708	4.1.06	Cell envelope	G+ membrane	hypothetical protein	CBO1156	-0.0637352	0.587942	0.853626	-0.354339	0.00641694	0.0152843
CBO1157	CAL82709	4.1.06	Cell envelope	G+ membrane	hypothetical protein	CBO1157	0.405036	0.00185322	0.0201924	-0.0905823	0.3929	0.523368
CBO1159	CAL82710	4.2.02	Ribosome constituents	Ribosomal proteins - synthesis, modification	30S ribosomal protein S1	rpsA, CBO1159	0.22438	0.151086	0.455399	1.49839	5.72e-09	4.84e-08
CBO1160	CAL82711	7.0.0	Not classified	Not classified (included putative assignments)	thioesterase	CBO1160	-0.364586	0.0096512	0.0709724	0.366834	0.0346245	0.0694742
CBO1161	CAL82712	0.0.02	Unknown function	Conserved in other than E.coli	hypothetical protein	CBO1161	-0.178349	0.419066	0.751635	0.855388	9.39e-05	0.000323152
CBO1162	CAL82713	1.5.0	Transport/binding proteins	Transport/binding proteins	ABC transporter substrate-binding protein	CBO1162	-0.150825	0.345934	0.692089	0.0997444	0.530322	0.651853
CBO1163	CAL82714	1.5.0	Transport/binding proteins	Transport/binding proteins	ABC transporter permease	CBO1163	0.463725	0.012573	0.0862514	0.911014	3.23e-05	0.000120024
CBO1164	CAL82715	1.5.0	Transport/binding proteins	Transport/binding proteins	ABC transporter ATP-binding protein	CBO1164	0.35986	0.0230357	0.135115	0.374889	0.0242071	0.0506511
CBO1165	CAL82716	4.1.06	Cell envelope	G+ membrane	hypothetical protein	CBO1165	-0.0599809	0.703063	0.905126	-0.510827	0.00382613	0.00957281
CBO1166	CAL82717	3.3.20	Central intermediary metabolism	Amino acids	aspartate aminotransferase	asdA, aspD, CBO1166	-0.499927	0.079755	0.313965	-0.887666	2.38e-05	9.07e-05
CBO1167	CAL82718	4.1.06	Cell envelope	G+ membrane	hypothetical protein	CBO1167	-0.265076	0.0473259	0.221459	-0.168334	0.204709	0.315958
CBO1168	CAL82719	3.4.03	Degradation of small molecules	Carbon compounds	kinase, PfkB family	CBO1168	0.135336	0.404797	0.740646	1.84564	8.97e-10	9.67e-09
CBO1169	CAL82720	0.0.02	Unknown function	Conserved in other than E.coli	indigoidine synthase A family protein	CBO1169	-0.153931	0.383456	0.723121	0.111234	0.531598	0.653167
CBO1170	CAL82721	3.2.10	Biosynthesis of cofactors, carriers	Pantothenate	2-dehydropantoate 2-reductase	panE, CBO1170	0.203552	0.139289	0.435955	-0.328327	0.0466682	0.0904789
CBO1171	CAL82722	3.2.10	Biosynthesis of cofactors, carriers	Pantothenate	methenyltetrahydrofolate cyclohydrolase	fchA, CBO1171	-0.344295	0.0723703	0.294668	0.543855	0.000329611	0.00102613
CBO1172	CAL82723	3.2.10	Biosynthesis of cofactors, carriers	Pantothenate	methylenetetrahydrofolate dehydrogenase	CBO1172	-0.30091	0.157525	0.465973	-1.053	1.87e-06	8.86e-06
CBO1173	CAL82724	7.0.0	Not classified	Not classified (included putative assignments)	HAD hydrolase	CBO1173	-0.763125	0.000109079	0.00224348	-1.09331	3.37e-06	1.52e-05
CBO1174	CAL82725	7.0.0	Not classified	Not classified (included putative assignments)	diamine N-acetyltransferase	CBO1174	0.792223	0.00324873	0.0309475	2.1481	2.4e-09	2.26e-08
CBO1176	CAL82726	4.1.06	Cell envelope	G+ membrane	hypothetical protein	CBO1176	0.144207	0.275997	0.624945	0.123977	0.347007	0.477221
CBO1177	CAL82727	1.5.02	Transport/binding proteins	Cations	zinc transporter	CBO1177	0.691668	0.121303	0.40273	3.81769	5.76e-15	5.81e-13
CBO1178	CAL82728	6.5.0	Regulation	Others	rrf2 family protein	CBO1178	-0.190277	0.272813	0.62122	1.94874	4.39e-11	7.45e-10
CBO1179	CAL82729	3.1.06	Amino acid biosynthesis	Cysteine	cysteine synthase A	cysK2, CBO1179	0.423108	0.114834	0.390844	2.31645	2.72e-08	1.92e-07
CBO1180	CAL82730	1.5.01	Transport/binding proteins	Amino acids and amines	amino acid ABC transporter permease	CBO1180	0.306101	0.0649358	0.27382	2.70431	4.91e-13	1.89e-11
CBO1181	CAL82731	1.5.01	Transport/binding proteins	Amino acids and amines	polar amino acid ABC transporter amino acid-binding protein	CBO1181	0.718963	0.0340238	0.177002	2.65339	2.37e-11	4.5e-10
CBO1182	CAL82732	3.1.01	Amino acid biosynthesis	Alanine	cysteine desulfhydrase	iscS, CBO1182	0.143831	0.498432	0.805735	2.40118	5.58e-10	6.48e-09
CBO1183	CAL82733	0.0.02	Unknown function	Conserved in other than E.coli	hypothetical protein	CBO1183	0.096235	0.504922	0.809079	2.41292	6.15e-12	1.45e-10
CBO1185	CAL82734	2.2.01	Macromolecule synthesis, modification	Amino acyl tRNA synthesis; tRNA modification	tRNA-specific 2-thiouridylase MnmA	trmU1, mnmA, mnmA1, CBO1185	-0.187812	0.176913	0.496183	1.71388	9.51e-11	1.43e-09
CBO1186	CAL82735	6.1.02	Regulation	Response regulator	DNA-binding response regulator, LytTr family	CBO1186	-0.733845	1.69923e-05	0.000502647	-0.386747	0.0179446	0.038827
CBO1187	CAL82736	6.1.01	Regulation	Sensor kinase	sensor histidine kinase	CBO1187	-0.191406	0.521406	0.818509	-0.679519	0.0317446	0.0643604
CBO1188	CAL82737	1.5.0	Transport/binding proteins	Transport/binding proteins	bacitracin ABC transporter ATP-binding protein BcrA	CBO1188	0.160035	0.14722	0.44827	-0.363659	0.0560988	0.10616
CBO1189	CAL82738	4.1.06	Cell envelope	G+ membrane	hypothetical protein	CBO1189	0.0752179	0.599517	0.859488	-0.0887022	0.700906	0.794966
CBO1190	CAL82739	7.0.0	Not classified	Not classified (included putative assignments)	glycerophosphoryl diester phosphodiesterase	CBO1190	0.0226417	0.885147	0.970701	-0.329926	0.0462376	0.0897879
CBO1191	CAL82740	0.0.02	Unknown function	Conserved in other than E.coli	hypothetical protein	CBO1191	0.199506	0.21323	0.547799	-0.878083	1.97e-05	7.62e-05
CBO1192	CAL82741	3.5.04	Energy metabolism, carbon	Fermentation	pyruvate-flavodoxin oxidoreductase	nifJ1, CBO1192	0.102782	0.485005	0.798838	-0.115019	0.43532	0.563882
CBO1193	CAL82742	6.3.08	Regulation	TetR	TetR family transcriptional regulator	CBO1193	0.35938	0.272884	0.621257	3.40746	9.84e-12	2.14e-10
CBO1194	CAL82743	1.5.02	Transport/binding proteins	Cations	transporter monovalent cation:proton antiporter-2 (CPA2) family	CBO1194	0.0872318	0.771097	0.931937	2.66677	2.85e-08	2.01e-07
CBO1195	CAL82744	0.0.02	Unknown function	Conserved in other than E.coli	hypothetical protein	CBO1195	0.0933194	0.732211	0.918006	1.60868	3.85e-06	1.71e-05
CBO1197	CAL82745	7.0.0	Not classified	Not classified (included putative assignments)	amine oxidase	CBO1197	0.0431192	0.752217	0.924837	0.570282	0.00045239	0.00137173
CBO1198	CAL82746	6.3.02	Regulation	AraC	AraC family transcriptional regulator	CBO1198	-0.293556	0.101952	0.364226	-0.397874	0.00947913	0.0217835
CBO1199	CAL82747	4.1.06	Cell envelope	G+ membrane	hypothetical protein	CBO1199	-0.287239	0.123202	0.40672	-0.404512	0.0205907	0.0438242
CBO1200	CAL82748	3.4.03	Degradation of small molecules	Carbon compounds	O-glycosyl hydrolase, family 30	CBO1200	-0.261918	0.252839	0.597258	-0.656515	0.00043078	0.00131227
CBO1201	CAL82749	3.4.03	Degradation of small molecules	Carbon compounds	ROK family protein	CBO1201	-0.0877152	0.577338	0.849516	-0.527362	0.00296459	0.00761694
CBO1202	CAL82750	3.4.03	Degradation of small molecules	Carbon compounds	glycosyl hydrolase family protein	CBO1202	-0.157424	0.410016	0.745056	-0.385185	0.0209317	0.0444658
CBO1203	CAL82751	2.1.03	Macromolecule degradation	Degradation of polysaccharides	beta-amylase	CBO1203	0.0614429	0.626937	0.871719	0.0651972	0.663659	0.765042
CBO1204	CAL82752	2.2.01	Macromolecule synthesis, modification	Amino acyl tRNA synthesis; tRNA modification	tyrosyl-tRNA synthetase	tyrZ, tyrR, tyrS1, tyrT, CBO1204	0.461079	0.00548188	0.0458386	-0.268267	0.0536085	0.101926
CBO1205	CAL82753	6.3.03	Regulation	GntR	GntR family transcriptional regulator	CBO1205	-0.0451831	0.818899	0.948893	1.01322	5.14e-05	0.000184921
CBO1206	CAL82754	1.5.0	Transport/binding proteins	Transport/binding proteins	ABC transporter ATP-binding protein	CBO1206	0.0401002	0.795398	0.942103	1.05235	3.72e-06	1.66e-05
CBO1207	CAL82755	4.1.06	Cell envelope	G+ membrane	hypothetical protein	CBO1207	0.161012	0.346637	0.693141	1.04563	5.28e-06	2.28e-05
CBO1208	CAL82756	0.0.02	Unknown function	Conserved in other than E.coli	hypothetical protein	CBO1208	-0.3673	0.0582952	0.254548	-0.33848	0.0789073	0.1426
CBO1210	CAL82757	0.0.02	Unknown function	Conserved in other than E.coli	hypothetical protein	CBO1210	-0.0874097	0.65542	0.884027	-0.205672	0.248597	0.368447
CBO1211	CAL82758	4.1.07	Cell envelope	G+ exported/lipoprotein	hypothetical protein	CBO1211	0.123514	0.323777	0.673267	-0.346526	0.0108745	0.0246909
CBO1212	CAL82759	2.1.03	Macromolecule degradation	Degradation of polysaccharides	glycosyl hydrolase family protein	CBO1212	-0.179238	0.220202	0.557733	0.122063	0.412008	0.541352
CBO1213	CAL82760	6.5.0	Regulation	Others	sensory box-containing diguanylate cyclase	CBO1213	-0.177514	0.219885	0.557398	-0.127856	0.278121	0.401577
CBO1214	CAL82761	3.3.04	Central intermediary metabolism	Gluconeogenesis	L-serine dehydratase, iron-sulfur-dependent subunit beta	sdhB, CBO1214	-0.774199	0.000268365	0.00465117	-0.844755	8.24e-06	3.42e-05
CBO1215	CAL82762	3.3.04	Central intermediary metabolism	Gluconeogenesis	L-serine dehydratase, iron-sulfur-dependent subunit alpha	sdhA, CBO1215	-0.562525	0.00542173	0.0454081	-1.08449	8.25e-06	3.42e-05
CBO1215A	CAL82763	1.1.01	Cell processes	Chemotaxis and mobility	putative methyl-accepting chemotaxis protein (partial)	CBO1215A	0.126191	0.317613	0.667059	-0.0752658	0.533271	0.654915
CBO1216	CAL82764	0.0.0	Unknown function	Unknown function, no known homologues	hypothetical protein	CBO1216	0.131644	0.428122	0.759404	-0.200464	0.235733	0.353342
CBO1217	CAL82765	0.0.0	Unknown function	Unknown function, no known homologues	hypothetical protein	CBO1217	-0.118284	0.259254	0.605977	-0.0949709	0.362137	0.492435
CBO1219	CAL82767	7.0.0	Not classified	Not classified (included putative assignments)	hypothetical protein	CBO1219	0.121594	0.441955	0.770216	0.638405	0.000585238	0.00173771
CBO1220	CAL82768	2.1.04	Macromolecule degradation	Degradation of proteins, peptides, glycoproteins	dipeptidase	CBO1220	-0.243261	0.0705527	0.289666	-0.405252	0.0048206	0.0117725
CBO1221	CAL82769	4.1.06	Cell envelope	G+ membrane	hypothetical protein	CBO1221	-0.0477132	0.803075	0.944412	-2.04926	3.46e-09	3.1e-08
CBO1221A	CAL82770	0.0.0	Unknown function	Unknown function, no known homologues	hypothetical protein	CBO1221A	0.104465	0.565658	0.842702	-1.39458	2.53e-05	9.58e-05
CBO1222	CAL82771	1.5.0	Transport/binding proteins	Transport/binding proteins	ABC transporter permease	CBO1222	0.0164087	0.93348	0.98421	-1.87124	5.84e-10	6.75e-09
CBO1223	CAL82772	1.5.0	Transport/binding proteins	Transport/binding proteins	hypothetical protein	CBO1223	-0.185531	0.521418	0.818509	-0.232394	0.243364	0.362192
CBO1224	CAL82773	1.5.0	Transport/binding proteins	Transport/binding proteins	oligopeptide ABC transporter ATP-binding protein	CBO1224	0.141179	0.436639	0.765108	-0.903219	6.73e-05	0.000236645
CBO1225	CAL82774	1.5.05	Transport/binding proteins	Other	oligopeptide ABC transporter permease	appC, CBO1225	0.145022	0.249889	0.594783	-0.49413	0.000382496	0.00117657
CBO1226	CAL82775	1.5.05	Transport/binding proteins	Other	oligopeptide ABC transporter permease	appB, CBO1226	0.0759227	0.485333	0.798838	-0.655167	5.25e-05	0.00018837
CBO1227	CAL82776	1.5.05	Transport/binding proteins	Other	oligopeptide ABC transporter oligopeptide-binding protein	appA, CBO1227	0.103326	0.690368	0.899764	-1.39783	2.63e-06	1.21e-05
CBO1228	CAL82777	0.0.02	Unknown function	Conserved in other than E.coli	hypothetical protein	CBO1228	0.101155	0.4476	0.774392	-0.173329	0.264933	0.387045
CBO1229	CAL82778	1.8.01	Differentiation/sporulation/Germination	Differentiation/sporulation/Germination	spore coat peptide assembly protein CotJB	cotJB, CBO1229	-0.0743194	0.520314	0.817822	-0.138891	0.337441	0.467293
CBO1230	CAL82779	1.8.01	Differentiation/sporulation/Germination	Differentiation/sporulation/Germination	spore coat peptide assembly protein CotJC	cotJC, CBO1230	-0.153584	0.329836	0.678509	0.219336	0.169493	0.270766
CBO1231	CAL82780	4.1.06	Cell envelope	G+ membrane	hypothetical protein	CBO1231	0.402479	0.00898147	0.0674791	0.395983	0.00478181	0.0117013
CBO1232	CAL82781	4.1.07	Cell envelope	G+ exported/lipoprotein	exported protein	CBO1232	0.905329	4.2787e-06	0.00016759	1.11359	3.49e-07	1.92e-06
CBO1233	CAL82782	0.0.02	Unknown function	Conserved in other than E.coli	hypothetical protein	CBO1233	0.774655	0.00020376	0.00374163	1.05745	2.34e-06	1.09e-05
CBO1234	CAL82783	0.0.0	Unknown function	Unknown function, no known homologues	hypothetical protein	CBO1234	-0.194107	0.266614	0.614035	-0.290718	0.0855789	0.152919
CBO1235	CAL82784	3.3.01	Central intermediary metabolism	2'-Deoxyribonucleotide metabolism	deoxyuridine 5'-triphosphate nucleotidohydrolase	CBO1235	0.0309611	0.855936	0.961104	-0.281103	0.135284	0.22429
CBO1236	CAL82785	1.8.01	Differentiation/sporulation/Germination	Differentiation/sporulation/Germination	small acid-soluble spore protein, H-type	CBO1236	0.316344	0.0849866	0.326528	0.643746	0.000236539	0.000757974
CBO1237	CAL82786	0.0.0	Unknown function	Unknown function, no known homologues	hypothetical protein	CBO1237	-0.21718	0.218617	0.555163	0.0344954	0.801074	0.868635
CBO1238	CAL82787	0.0.02	Unknown function	Conserved in other than E.coli	hypothetical protein	CBO1238	1.07706	0.00349727	0.0328969	2.07139	8.31e-08	5.24e-07
CBO1239	CAL82788	0.0.02	Unknown function	Conserved in other than E.coli	hypothetical protein	CBO1239	-0.57701	0.0243516	0.14058	-1.35272	1.62e-05	6.34e-05
CBO1240	CAL82789	6.5.0	Regulation	Others	DNA-binding protein	CBO1240	-0.13461	0.494514	0.803709	0.0689166	0.573598	0.690221
CBO1241	CAL82790	4.1.06	Cell envelope	G+ membrane	hypothetical protein	CBO1241	-0.990241	3.0898e-06	0.000133727	-1.34826	2.8e-08	1.97e-07
CBO1242	CAL82791	6.3.08	Regulation	TetR	TetR family transcriptional regulator	CBO1242	-0.0758863	0.596394	0.857783	0.527219	0.00139332	0.00382598
CBO1243	CAL82792	0.0.02	Unknown function	Conserved in other than E.coli	conserved hypothetical protein (partial)	CBO1243	0.0242141	0.852366	0.959598	0.459219	0.00202437	0.00537226
CBO1243A	CAL82793	0.0.02	Unknown function	Conserved in other than E.coli	hypothetical protein	CBO1243A	-0.113189	0.467759	0.788259	0.261469	0.114562	0.195432
CBO1244	CAL82794	0.0.0	Unknown function	Unknown function, no known homologues	hypothetical protein	CBO1244	0.148611	0.340832	0.686377	-0.296721	0.0303771	0.061955
CBO1245	CAL82795	1.5.01	Transport/binding proteins	Amino acids and amines	sodium:alanine symporter family protein	CBO1245	-0.0718402	0.596583	0.857859	-0.0804709	0.758326	0.837602
CBO1246	CAL82796	0.0.0	Unknown function	Unknown function, no known homologues	hypothetical protein	CBO1246	-0.0171289	0.927792	0.982485	-0.0798337	0.510151	0.633892
CBO1247	CAL82797	0.0.0	Unknown function	Unknown function, no known homologues	hypothetical protein	CBO1247	-1.038	1.45368e-05	0.000438248	-2.26089	1.23e-10	1.78e-09
CBO1248	CAL82798	6.5.0	Regulation	Others	DNA-binding protein	CBO1248	-0.0489053	0.69396	0.900426	-0.172582	0.174802	0.277444
CBO1248A	CAL82799	0.0.02	Unknown function	Conserved in other than E.coli	hypothetical protein	CBO1248A	0.320119	0.0836696	0.323436	-0.154928	0.38788	0.518569
CBO1249	CAL82800	0.0.0	Unknown function	Unknown function, no known homologues	hypothetical protein	CBO1249	-0.105113	0.484437	0.798838	0.152703	0.313235	0.440911
CBO1250	CAL82802	7.0.0	Not classified	Not classified (included putative assignments)	hypothetical protein	CBO1250	-0.0598009	0.747362	0.923138	-0.128728	0.490258	0.615737
CBO1251	CAL82803	4.1.07	Cell envelope	G+ exported/lipoprotein	lipoprotein	CBO1251	-0.566845	0.00576494	0.0478243	-1.63658	3.16e-10	3.93e-09
CBO1252	CAL82804	3.2.15	Biosynthesis of cofactors, carriers	Thioredoxin, glutaredoxin, glutathione	rubredoxin	grxC, CBO1252	0.656148	0.00965903	0.0709822	2.7351	2.83e-10	3.59e-09
CBO1253	CAL82805	3.2.11	Biosynthesis of cofactors, carriers	Pyridine nucleotide	NADP-dependent glyceraldehyde-3-phosphate dehydrogenase	gapN, CBO1253	1.08264	2.81168e-06	0.000124291	5.41306	1.2e-17	5.09e-15
CBO1254	CAL82806	3.3.15	Central intermediary metabolism	Pool, multipurpose conversions of intermediate metabolism	thioredoxin reductase	trxB1, CBO1254	1.6541	8.4973e-07	4.97108e-05	5.56314	8.93e-15	8.22e-13
CBO1255	CAL82807	3.5.0	Energy metabolism, carbon	Energy metabolism, carbon	GrdX protein	grdX, CBO1255	0.470857	0.0459841	0.21684	1.61995	6.03e-07	3.17e-06
CBO1256	CAL82808	3.5.0	Energy metabolism, carbon	Energy metabolism, carbon	glycine reductase complex component B, alpha and beta subunits	grdE, CBO1256	-0.359268	0.196499	0.524031	0.441027	0.0164246	0.0358791
CBO1257	CAL82809	3.5.0	Energy metabolism, carbon	Energy metabolism, carbon	glycine reductase complex component b gamma subunit	grdB, CBO1257	-0.142991	0.611086	0.865177	-0.548251	0.327348	0.456772
CBO1259	CAL82810	3.5.0	Energy metabolism, carbon	Energy metabolism, carbon	thioredoxin-disulfide reductase	trxB2, CBO1259	-0.199996	0.38281	0.722909	1.72729	5.53e-06	2.38e-05
CBO1260	CAL82811	3.5.0	Energy metabolism, carbon	Energy metabolism, carbon	thioredoxin family protein	trxA, CBO1260	-0.343379	0.205543	0.536179	0.755132	0.0983234	0.172288
CBO1261	CAL82812	3.5.0	Energy metabolism, carbon	Energy metabolism, carbon	glycine/sarcosine/betaine reductase complex protein A	grdA, CBO1261	-0.55399	0.0476175	0.222493	0.346246	0.13972	0.230528
CBO1263	CAL82813	3.5.0	Energy metabolism, carbon	Energy metabolism, carbon	glycine reductase complex component C subunit beta	grdC, CBO1263	-0.445291	0.0173538	0.109021	0.406187	0.0155664	0.0341896
CBO1264	CAL82814	3.5.0	Energy metabolism, carbon	Energy metabolism, carbon	glycine reductase complex component C subunit alpha	grdD, CBO1264	-0.260944	0.176001	0.494594	0.681391	0.00163857	0.00443825
CBO1265	CAL82815	2.2.03	Macromolecule synthesis, modification	DNA - replication, repair, restriction/modification	3-methyladenine DNA glycosylase	CBO1265	0.122798	0.26892	0.617426	0.214259	0.149666	0.244198
CBO1266	CAL82816	2.2.03	Macromolecule synthesis, modification	DNA - replication, repair, restriction/modification	restriction endonuclease	CBO1266	0.136728	0.379678	0.720829	-0.156817	0.26929	0.391666
CBO1267	CAL82817	3.4.05	Degradation of small molecules	Other	methylthioribose kinase	mtnK, ykrT, CBO1267	-0.681252	3.54538e-05	0.000928347	-0.806397	4.78e-07	2.56e-06
CBO1268	CAL82818	3.4.05	Degradation of small molecules	Other	methylthioribose-1-phosphate isomerase	mtnA, CBO1268	-0.374837	0.0442042	0.210736	-0.796932	7.91e-05	0.000274762
CBO1269	CAL82819	1.5.0	Transport/binding proteins	Transport/binding proteins	putative transporter (partial)	CBO1269	-0.148038	0.359004	0.703987	0.0858096	0.51727	0.640009
CBO1270	CAL82820	7.0.0	Not classified	Not classified (included putative assignments)	AraD/FucA subfamily aldolase	CBO1270	-0.131393	0.447983	0.774615	-1.21284	8.84e-07	4.49e-06
CBO1271	CAL82821	6.3.10	Regulation	DeoR	DeoR family transcriptional regulator	CBO1271	0.0826425	0.554548	0.836246	0.337726	0.023783	0.0498432
CBO1273	CAL82822	4.1.06	Cell envelope	G+ membrane	hypothetical protein	CBO1273	-0.466882	0.00180733	0.0198479	-1.54028	2.96e-10	3.72e-09
CBO1274	CAL82823	1.5.02	Transport/binding proteins	Cations	cation efflux family protein	CBO1274	0.0378608	0.824498	0.950716	-0.0258525	0.87503	0.91882
CBO1275	CAL82824	4.1.06	Cell envelope	G+ membrane	hypothetical protein	CBO1275	-0.155869	0.231213	0.571747	0.145739	0.418811	0.548145
CBO1276	CAL82825	4.1.06	Cell envelope	G+ membrane	hypothetical protein	CBO1276	0.0659577	0.671142	0.890386	0.0759533	0.625169	0.734089
CBO1277	CAL82826	4.1.06	Cell envelope	G+ membrane	hypothetical protein	CBO1277	-0.0381493	0.75673	0.926422	-0.220942	0.126825	0.212822
CBO1278	CAL82827	0.0.02	Unknown function	Conserved in other than E.coli	hypothetical protein	CBO1278	0.0903661	0.604598	0.861982	-0.155634	0.305095	0.431965
CBO1279	CAL82828	4.1.06	Cell envelope	G+ membrane	hypothetical protein	CBO1279	1.14284	9.888e-05	0.00207477	1.28407	8.16e-08	5.16e-07
CBO1280	CAL82829	0.0.0	Unknown function	Unknown function, no known homologues	hypothetical protein	CBO1280	1.214	2.6925e-05	0.000734347	-0.562851	0.0182326	0.0393481
CBO1281	CAL82830	0.0.0	Unknown function	Unknown function, no known homologues	hypothetical protein	CBO1281	-0.193353	0.428229	0.759404	0.64576	0.0141241	0.0312617
CBO1281A	CAL82831	0.0.0	Unknown function	Unknown function, no known homologues	hypothetical protein	CBO1281A	-0.0806664	0.78963	0.93848	-0.186148	0.235184	0.352753
CBO1283	CAL82832	4.1.06	Cell envelope	G+ membrane	hypothetical protein	CBO1283	-0.127564	0.522911	0.819056	-0.286004	0.0633695	0.11792
CBO1284	CAL82833	4.1.06	Cell envelope	G+ membrane	hypothetical protein	CBO1284	0.0627733	0.741432	0.921666	0.138157	0.411388	0.540763
CBO1285	CAL82834	3.4.05	Degradation of small molecules	Other	xanthine dehydrogenase subunit XdhA	xdhA2, CBO1285	0.296628	0.107484	0.377057	-0.785179	0.00436522	0.0107707
CBO1286	CAL82835	3.4.05	Degradation of small molecules	Other	xanthine dehydrogenase subunit XdhB	xdhB2, CBO1286	0.245977	0.0786799	0.311793	-0.0762797	0.608182	0.719946
CBO1287	CAL82836	3.4.05	Degradation of small molecules	Other	xanthine dehydrogenase, iron-sulfur binding subunit	xdhC2, CBO1287	0.341035	0.230914	0.571366	0.113393	0.444198	0.57162
CBO1288	CAL82837	3.3.17	Central intermediary metabolism	Salvage of nucleosides and nucleotides	guanine deaminase	guaD, CBO1288	0.675519	0.000694661	0.0097086	1.85309	1.03e-09	1.09e-08
CBO1289	CAL82838	2.2.03	Macromolecule synthesis, modification	DNA - replication, repair, restriction/modification	DNA topoisomerase III	CBO1289	0.996924	7.21618e-06	0.000251798	2.40286	1.21e-10	1.75e-09
CBO1290	CAL82839	4.1.06	Cell envelope	G+ membrane	hypothetical protein	CBO1290	-0.411644	0.0857169	0.328286	-0.73147	0.000232302	0.000745461
CBO1291	CAL82840	0.0.02	Unknown function	Conserved in other than E.coli	hypothetical protein	CBO1291	-0.732757	0.000159581	0.00307384	-1.54213	6.78e-09	5.63e-08
CBO1292	CAL82841	3.3.09	Central intermediary metabolism	Non-oxidative branch, pentose pathway	translaldolase	tal, CBO1292	-1.26451	4.45771e-06	0.000172361	-1.61377	1.07e-08	8.38e-08
CBO1293	CAL82842	7.0.0	Not classified	Not classified (included putative assignments)	RNA-metabolising metallo-beta-lactamase	CBO1293	-0.840654	0.000161331	0.00309618	-0.522096	0.00133753	0.00368628
CBO1294	CAL82843	1.5.01	Transport/binding proteins	Amino acids and amines	sodium/alanine symporter	CBO1294	0.584094	0.00272058	0.0270784	1.70393	1.12e-09	1.17e-08
CBO1295	CAL82844	6.5.0	Regulation	Others	diguanylate cyclase	CBO1295	0.0986798	0.533038	0.823767	0.364311	0.0301607	0.0615456
CBO1296	CAL82845	4.1.08	Cell envelope	G+ surface anchored	STE like transcription factor domain protein	CBO1296	0.0392038	0.800493	0.943844	-0.101353	0.534115	0.655645
CBO1297	CAL82846	4.1.06	Cell envelope	G+ membrane	glycosyl transferase family protein	CBO1297	-0.054807	0.703897	0.905128	-0.312779	0.0402948	0.079374
CBO1298	CAL82847	4.1.08	Cell envelope	G+ surface anchored	cellulose synthase domain protein	CBO1298	0.145692	0.301327	0.650914	-0.330497	0.0281387	0.0579075
CBO1300	CAL82848	4.1.07	Cell envelope	G+ exported/lipoprotein	hypothetical protein	CBO1300	0.257058	0.107384	0.376957	0.956208	5.06e-06	2.19e-05
CBO1301	CAL82849	0.0.02	Unknown function	Conserved in other than E.coli	hypothetical protein	CBO1301	0.611219	0.0111802	0.0791108	-0.405191	0.194068	0.302381
CBO1302	CAL82850	4.1.06	Cell envelope	G+ membrane	hypothetical protein	CBO1302	-0.121855	0.28122	0.631412	-0.551239	0.000242894	0.000775968
CBO1303	CAL82851	0.0.02	Unknown function	Conserved in other than E.coli	hypothetical protein	CBO1303	NA	NA	NA	NA	NA	NA
CBO1304	CAL82852	1.5.05	Transport/binding proteins	Other	copper-translocating P-type ATPase	CBO1304	0.171016	0.433747	0.763948	2.56494	2.01e-11	3.88e-10
CBO1305	CAL82853	1.5.05	Transport/binding proteins	Other	copper chaperone CopZ	CBO1305	-0.06276	0.690916	0.899778	-0.0970093	0.583743	0.69954
CBO1306	CAL82854	1.5.02	Transport/binding proteins	Cations	cation-transporting ATPase, P-type	CBO1306	0.708189	3.74337e-05	0.00097371	0.66376	0.000301781	0.000946606
CBO1308	CAL82855	1.5.0	Transport/binding proteins	Transport/binding proteins	ABC transporter permease/ATP-binding protein	CBO1308	0.371067	0.00976292	0.0715011	0.167538	0.188717	0.295477
CBO1309	CAL82856	4.1.06	Cell envelope	G+ membrane	protease	CBO1309	0.983608	0.00242221	0.0247683	2.01053	2.55e-11	4.75e-10
CBO1310	CAL82857	7.0.0	Not classified	Not classified (included putative assignments)	dinitrogenase iron-molybdenum cofactor family protein	CBO1310	0.654576	0.0103833	0.0747153	3.00205	6.83e-11	1.08e-09
CBO1311	CAL82858	0.0.02	Unknown function	Conserved in other than E.coli	DegV family protein	CBO1311	-0.274161	0.0306624	0.164183	0.0954622	0.488563	0.614492
CBO1312	CAL82859	7.0.0	Not classified	Not classified (included putative assignments)	5-nitroimidazole antibiotic resistance protein	CBO1312	-0.263981	0.404032	0.740192	-0.8642	0.0116162	0.0262386
CBO1313	CAL82860	4.1.06	Cell envelope	G+ membrane	hypothetical protein	CBO1313	0.0607456	0.670269	0.890053	0.295407	0.0490903	0.0944995
CBO1314	CAL82861	7.0.0	Not classified	Not classified (included putative assignments)	HIT family protein	CBO1314	-0.383408	0.0594599	0.257706	-1.26258	2.64e-06	1.22e-05
CBO1315	CAL82862	4.1.06	Cell envelope	G+ membrane	hypothetical protein	CBO1315	0.0363306	0.834041	0.953319	0.0418403	0.793662	0.863156
CBO1316	CAL82863	2.2.09	Macromolecule synthesis, modification	Protein modification	type IV leader peptidase	CBO1316	-0.0905801	0.568449	0.843375	-0.211756	0.190775	0.298225
CBO1317	CAL82864	4.1.06	Cell envelope	G+ membrane	hypothetical protein	CBO1317	0.553304	0.000835901	0.011109	0.528683	0.000461041	0.00139634
CBO1318	CAL82865	1.5.02	Transport/binding proteins	Cations	potassium transporter peripheral membrane protein	trkA, sapG, CBO1318	-1.58031	7.03366e-09	1.36653e-06	-1.9446	2.34e-10	3.06e-09
CBO1319	CAL82866	1.5.02	Transport/binding proteins	Cations	Trk system potassium uptake protein TrkH	CBO1319	0.0681071	0.663362	0.887622	-1.37363	6.54e-08	4.21e-07
CBO1320	CAL82867	4.1.06	Cell envelope	G+ membrane	hypothetical protein	CBO1320	-0.127592	0.362024	0.70667	0.12055	0.388561	0.519259
CBO1321	CAL82868	2.2.03	Macromolecule synthesis, modification	DNA - replication, repair, restriction/modification	helicase, UvrD/REP/exonuclease	CBO1321	-0.0546237	0.716258	0.910996	0.154562	0.179946	0.284176
CBO1322	CAL82869	4.1.06	Cell envelope	G+ membrane	hypothetical protein	CBO1322	-0.154779	0.411959	0.746503	0.313015	0.106175	0.183613
CBO1323	CAL82870	6.3.03	Regulation	GntR	GntR family transcriptional regulator	CBO1323	0.389246	0.0167284	0.106374	0.849408	9.78e-05	0.000335276
CBO1324	CAL82871	4.1.09	Cell envelope	G+ peptidoglycan, teichoic acid	cell wall hydrolase	CBO1324	-0.236541	0.155276	0.461837	-0.0885936	0.540207	0.661163
CBO1325	CAL82872	1.4.02	Protection responses	Detoxification	rubrerythrin	rbr, rubY, CBO1325	0.140673	0.56724	0.843039	-0.849153	0.00233474	0.00613284
CBO1326	CAL82873	4.1.09	Cell envelope	G+ peptidoglycan, teichoic acid	cell wall hydrolase	CBO1326	0.08777	0.441722	0.769939	-0.22321	0.060286	0.112903
CBO1327	CAL82874	1.5.03	Transport/binding proteins	Carbohydrates, organic acids and alcohols	PTS system, glucose-specific, IIABC component	ptsG, ptsX, crr, CBO1327	-0.0998563	0.485976	0.799082	-0.979932	0.00979803	0.0224409
CBO1328	CAL82875	4.1.09	Cell envelope	G+ peptidoglycan, teichoic acid	UDP pyrophosphate synthetase-like protein	CBO1328	0.145292	0.333513	0.681966	0.241095	0.268602	0.390863
CBO1329	CAL82876	0.0.0	Unknown function	Unknown function, no known homologues	hypothetical protein	CBO1329	0.0717546	0.724897	0.915504	-0.272961	0.142567	0.234424
CBO1330	CAL82877	6.5.0	Regulation	Others	transcriptional regulator	CBO1330	1.74439	4.52976e-08	5.20327e-06	2.80016	3.25e-10	4.04e-09
CBO1331	CAL82878	3.5.02	Energy metabolism, carbon	Anaerobic respiration	oxidoreductase, acetyl-CoA synthase subunit	CBO1331	1.87562	2.56074e-08	3.44496e-06	2.28501	1.5e-10	2.08e-09
CBO1332	CAL82879	3.5.02	Energy metabolism, carbon	Anaerobic respiration	nitrate reductase, iron-sulfur subunit	CBO1332	2.05435	1.34031e-08	2.39687e-06	2.43461	1.14e-10	1.66e-09
CBO1333	CAL82880	3.5.02	Energy metabolism, carbon	Anaerobic respiration	nitrate reductase, NADH oxidase subunit	CBO1333	2.23214	5.25585e-09	1.16495e-06	3.28145	7.32e-12	1.67e-10
CBO1334	CAL82881	4.1.06	Cell envelope	G+ membrane	transporter	CBO1334	-0.150404	0.383519	0.723153	0.210934	0.226127	0.341447
CBO1335	CAL82882	6.5.0	Regulation	Others	Crp/Fnr family transcriptional regulator	CBO1335	-0.283383	0.055137	0.245596	-0.684814	0.000395171	0.00121248
CBO1336	CAL82883	1.5.0	Transport/binding proteins	Transport/binding proteins	major facilitator superfamily protein	CBO1336	0.105997	0.405276	0.740747	0.293876	0.123394	0.208084
CBO1337	CAL82884	1.6.03	Adaptation	Fe storage	iron chelate uptake ABC transporter FeCT family, solute-binding protein	CBO1337	-0.287837	0.0359085	0.183471	-1.5842	1.56e-10	2.15e-09
CBO1338	CAL82885	1.6.03	Adaptation	Fe storage	iron chelate uptake ABC transporter FeCT family, permease	CBO1338	-0.253938	0.0396019	0.194451	-1.07218	8.71e-07	4.44e-06
CBO1339	CAL82886	1.6.03	Adaptation	Fe storage	iron ABC transporter ATP-binding protein	CBO1339	-0.0950297	0.544583	0.831879	-1.03383	2.81e-05	0.000105409
CBO1340	CAL82887	0.0.02	Unknown function	Conserved in other than E.coli	hypothetical protein	CBO1340	-0.352887	0.281431	0.631558	-0.75714	0.0280762	0.0578064
CBO1341	CAL82888	7.0.0	Not classified	Not classified (included putative assignments)	(Fe-S)-binding protein	CBO1341	-0.50224	0.0229947	0.134925	-1.29473	9.02e-06	3.71e-05
CBO1342	CAL82889	6.5.0	Regulation	Others	RpiR family transcriptional regulator	CBO1342	0.276486	0.0251639	0.143883	1.37503	2.49e-10	3.22e-09
CBO1343	CAL82890	3.4.03	Degradation of small molecules	Carbon compounds	N-acetylmuramic acid 6-phosphate etherase	murQ, CBO1343	0.165241	0.169827	0.484072	1.05552	3e-08	2.09e-07
CBO1344	CAL82891	1.5.03	Transport/binding proteins	Carbohydrates, organic acids and alcohols	PTS system transporter subunit IIBC	CBO1344	-0.0126327	0.945753	0.987284	0.776732	4.02e-06	1.78e-05
CBO1346	CAL82892	0.0.02	Unknown function	Conserved in other than E.coli	hypothetical protein	CBO1346	-0.0747145	0.684255	0.897045	0.14739	0.258058	0.378972
CBO1347	CAL82893	0.0.02	Unknown function	Conserved in other than E.coli	hypothetical protein	CBO1347	-0.223854	0.0487408	0.225997	-0.165573	0.135757	0.22498
CBO1348	CAL82894	0.0.02	Unknown function	Conserved in other than E.coli	hypothetical protein	CBO1348	-0.118625	0.453256	0.778191	0.219928	0.171976	0.27387
CBO1349	CAL82895	0.0.0	Unknown function	Unknown function, no known homologues	hypothetical protein	CBO1349	-0.0189868	0.869376	0.965721	0.0988509	0.523987	0.646255
CBO1350	CAL82896	4.1.06	Cell envelope	G+ membrane	hypothetical protein	CBO1350	-0.100236	0.492329	0.802213	-0.135955	0.337404	0.467283
CBO1351	CAL82897	4.1.07	Cell envelope	G+ exported/lipoprotein	cell-surface protein	CBO1351	0.0175248	0.897886	0.974107	0.110898	0.42073	0.549965
CBO1352	CAL82898	4.1.06	Cell envelope	G+ membrane	hypothetical protein	CBO1352	0.07674	0.621376	0.869131	-0.254097	0.112905	0.193276
CBO1353	CAL82899	0.0.0	Unknown function	Unknown function, no known homologues	hypothetical protein	CBO1353	-0.0207057	0.896105	0.9738	-0.0269891	0.860438	0.908911
CBO1354	CAL82900	1.1.01	Cell processes	Chemotaxis and mobility	methyl-accepting chemotaxis protein	CBO1354	1.15179	7.25595e-06	0.000252626	3.70491	3.31e-12	8.72e-11
CBO1355	CAL82901	1.5.0	Transport/binding proteins	Transport/binding proteins	peptide/opine/nickel uptake ABC transporter PepT family, substrate-binding protein	CBO1355	0.271237	0.296923	0.647142	0.17123	0.416936	0.546003
CBO1356	CAL82902	1.5.0	Transport/binding proteins	Transport/binding proteins	peptide/opine/nickel uptake ABC transporter permease	CBO1356	0.167563	0.337858	0.684429	-0.534711	0.00544936	0.013163
CBO1357	CAL82903	1.5.0	Transport/binding proteins	Transport/binding proteins	peptide/opine/nickel uptake ABC transporter PepT family, permease	CBO1357	0.181983	0.204769	0.535203	0.274863	0.137571	0.227459
CBO1358	CAL82904	1.5.0	Transport/binding proteins	Transport/binding proteins	peptide/opine/nickel uptake ABC transporter ATP-binding protein	CBO1358	-0.219653	0.126445	0.412908	-0.912642	1.39e-05	5.5e-05
CBO1359	CAL82905	1.5.0	Transport/binding proteins	Transport/binding proteins	peptide/opine/nickel uptake ABC transporter ATP-binding protein	CBO1359	-0.174924	0.27379	0.622546	-0.369489	0.0135315	0.0300897
CBO1360	CAL82906	4.1.07	Cell envelope	G+ exported/lipoprotein	lipoprotein	CBO1360	-0.0405748	0.767541	0.929795	0.017425	0.898888	0.934984
CBO1361	CAL82907	1.5.0	Transport/binding proteins	Transport/binding proteins	manganese/zinc/iron chelate uptake ABC transporter permease	CBO1361	0.138149	0.380113	0.721225	-0.209649	0.0944203	0.166617
CBO1362	CAL82908	1.5.0	Transport/binding proteins	Transport/binding proteins	manganese/zinc/iron chelate uptake ABC transporter ATP-binding protein	CBO1362	-0.219259	0.141846	0.43956	0.23761	0.128334	0.214782
CBO1363	CAL82909	1.5.0	Transport/binding proteins	Transport/binding proteins	manganese/zinc/iron chelate uptake ABC transporter Mzt family, substrate-binding protein	CBO1363	-0.427315	0.0196665	0.119958	-0.3598	0.0195721	0.0419112
CBO1364	CAL82910	4.1.06	Cell envelope	G+ membrane	hypothetical protein	CBO1364	0.413252	0.0678588	0.282138	1.72786	4.23e-08	2.85e-07
CBO1365	CAL82911	2.2.03	Macromolecule synthesis, modification	DNA - replication, repair, restriction/modification	helicase domain-containing protein	CBO1365	0.0697833	0.595802	0.857677	-0.69009	3.87e-05	0.000141813
CBO1366	CAL82912	6.5.0	Regulation	Others	signaling protein	CBO1366	0.0529909	0.725986	0.915773	-1.25545	8.1e-08	5.13e-07
CBO1368	CAL82913	1.5.0	Transport/binding proteins	Transport/binding proteins	lipoprotein	CBO1368	-0.103899	0.507504	0.809639	-0.268373	0.327325	0.456772
CBO1369	CAL82914	1.5.0	Transport/binding proteins	Transport/binding proteins	ABC transporter permease	CBO1369	-0.122396	0.293466	0.643273	0.473095	0.0099199	0.0226739
CBO1370	CAL82915	1.5.0	Transport/binding proteins	Transport/binding proteins	ABC transporter ATP-binding protein	CBO1370	-0.0927544	0.653895	0.883822	-0.847057	0.000228912	0.000735481
CBO1372	CAL82916	6.5.0	Regulation	Others	FUR family transcriptional regulator	CBO1372	-0.606426	0.115148	0.391359	0.449976	0.0197078	0.0421389
CBO1373	CAL82917	0.0.02	Unknown function	Conserved in other than E.coli	hypothetical protein	CBO1373	-0.49862	0.0107262	0.0766217	0.337902	0.0121882	0.0273812
CBO1374	CAL82918	1.8.01	Differentiation/sporulation/Germination	Differentiation/sporulation/Germination	zinc carboxypeptidase	CBO1374	-0.26746	0.0334519	0.174662	-0.681453	1.23e-05	4.92e-05
CBO1376	CAL82919	7.0.0	Not classified	Not classified (included putative assignments)	ribonuclease Z	CBO1376	-0.230184	0.127284	0.413857	-0.459887	0.00291875	0.00751265
CBO1377	CAL82920	1.5.01	Transport/binding proteins	Amino acids and amines	amino acid permease	CBO1377	0.214848	0.138653	0.434486	-0.154519	0.439936	0.568093
CBO1378	CAL82921	0.0.02	Unknown function	Conserved in other than E.coli	hypothetical protein	CBO1378	-0.202942	0.184746	0.507922	-0.336965	0.0340161	0.0683842
CBO1379	CAL82922	6.1.01	Regulation	Sensor kinase	sensor histidine kinase	CBO1379	-0.0801928	0.706984	0.906749	0.276648	0.0711536	0.13037
CBO1380	CAL82923	6.1.02	Regulation	Response regulator	LuxR family transcriptional regulator	CBO1380	-0.143329	0.306687	0.65602	-0.25157	0.0809323	0.145771
CBO1381	CAL82924	1.5.0	Transport/binding proteins	Transport/binding proteins	ABC transporter ATP-binding protein	CBO1381	-0.210174	0.206654	0.537102	-0.315057	0.0472536	0.0915125
CBO1382	CAL82925	1.5.0	Transport/binding proteins	Transport/binding proteins	ABC transporter permease	CBO1382	-0.0659947	0.550626	0.83512	-0.0751255	0.542852	0.663317
CBO1383	CAL82926	1.5.0	Transport/binding proteins	Transport/binding proteins	hypothetical protein	CBO1383	-0.16095	0.262726	0.609938	-0.307904	0.0397853	0.078508
CBO1384	CAL82927	4.1.06	Cell envelope	G+ membrane	hypothetical protein	CBO1384	-0.374867	0.0133591	0.0902282	-0.641194	0.000340552	0.00105706
CBO1385	CAL82928	7.0.0	Not classified	Not classified (included putative assignments)	nitroreductase	CBO1385	0.277407	0.0432603	0.207367	2.49349	3.41e-11	6.01e-10
CBO1386	CAL82929	0.0.02	Unknown function	Conserved in other than E.coli	hypothetical protein	CBO1386	2.70666	4.24274e-11	3.69554e-08	4.74226	1.65e-15	2.2e-13
CBO1387	CAL82930	1.6.01	Adaptation	Adaptations, atypical conditions	major cold shock protein	cspB, CBO1387	1.12055	1.22253e-05	0.000383246	2.22762	5.06e-09	4.34e-08
CBO1388	CAL82931	2.1.04	Macromolecule degradation	Degradation of proteins, peptides, glycoproteins	aminoacyl-histidine dipeptidase	CBO1388	-0.923085	4.77702e-06	0.000182024	-0.304522	0.0306102	0.0623819
CBO1389	CAL82932	4.1.07	Cell envelope	G+ exported/lipoprotein	exported protein	CBO1389	0.0964466	0.666669	0.888658	0.322507	0.283946	0.408003
CBO1390	CAL82933	3.2.12	Biosynthesis of cofactors, carriers	Pyridoxine	pyridoxamine kinase	CBO1390	0.43185	0.0186522	0.115019	1.47679	4.18e-08	2.82e-07
CBO1391	CAL82934	2.2.09	Macromolecule synthesis, modification	Protein modification	methionine-S-sulfoxide reductase	CBO1391	0.0565007	0.736234	0.919389	0.830821	7.65e-05	0.000266408
CBO1391A	CAL82935	1.5.0	Transport/binding proteins	Transport/binding proteins	peptide ABC transporter Pep4E family, ATP-binding protein	CBO1391A	-0.071565	0.630446	0.873125	-0.745809	2.4e-05	9.14e-05
CBO1392	CAL82936	1.5.0	Transport/binding proteins	Transport/binding proteins	peptide ABC transporter Pep4E family, permease	CBO1392	0.0940133	0.493981	0.803408	-0.198845	0.0927809	0.164092
CBO1393	CAL82937	4.1.07	Cell envelope	G+ exported/lipoprotein	hypothetical protein	CBO1393	0.196043	0.215926	0.550866	-0.20424	0.198106	0.307516
CBO1394	CAL82938	6.1.02	Regulation	Response regulator	DNA-binding response regulator	CBO1394	-0.114013	0.56785	0.843106	-0.803141	8.06e-06	3.35e-05
CBO1395	CAL82939	6.1.01	Regulation	Sensor kinase	sensor histidine kinase	CBO1395	-0.209303	0.111544	0.385033	-0.686881	0.000235872	0.000756298
CBO1396	CAL82940	1.5.0	Transport/binding proteins	Transport/binding proteins	peptide ABC transporter Pep4E family, ATP-binding protein	CBO1396	-0.726753	0.000519656	0.00777626	-1.16237	2.27e-06	1.06e-05
CBO1397	CAL82941	1.5.0	Transport/binding proteins	Transport/binding proteins	peptide ABC transporter Pep4E family, permease	CBO1397	-0.00940806	0.944211	0.987092	-0.364179	0.0129286	0.0288675
CBO1398	CAL82942	0.0.02	Unknown function	Conserved in other than E.coli	hypothetical protein	CBO1398	0.132467	0.304554	0.654509	0.0895066	0.484483	0.610433
CBO1399	CAL82943	0.0.02	Unknown function	Conserved in other than E.coli	hypothetical protein	CBO1399	0.132992	0.297462	0.647643	1.84366	1.16e-07	7.1e-07
CBO1400	CAL82944	7.0.0	Not classified	Not classified (included putative assignments)	aminotransferase, classes I and II	CBO1400	-0.832316	0.000127594	0.0025776	-2.53754	9.6e-12	2.1e-10
CBO1401	CAL82945	1.5.0	Transport/binding proteins	Transport/binding proteins	amino acid ABC transporter permease	CBO1401	-0.470501	0.00357815	0.0333982	-0.661352	0.000356279	0.00110261
CBO1402	CAL82946	1.5.0	Transport/binding proteins	Transport/binding proteins	polar amino acid ABC transporter ATP-binding protein	CBO1402	-0.41343	0.0067965	0.0544585	-2.06429	5.37e-11	8.79e-10
CBO1403	CAL82947	6.5.0	Regulation	Others	DNA-binding protein	CBO1403	0.20766	0.190025	0.514702	1.35089	3.89e-08	2.65e-07
CBO1404	CAL82948	4.1.09	Cell envelope	G+ peptidoglycan, teichoic acid	D-alanyl-D-alanine carboxypeptidase	CBO1404	0.0994114	0.532597	0.823571	-1.11036	3.88e-05	0.000142352
CBO1405	CAL82949	0.0.02	Unknown function	Conserved in other than E.coli	pyrophosphatase, MutT/nudix family	CBO1405	-0.111525	0.402363	0.738941	-0.132727	0.302988	0.429986
CBO1406	CAL82950	4.1.06	Cell envelope	G+ membrane	hypothetical protein	CBO1406	-0.0462063	0.74538	0.922882	-0.0677863	0.668645	0.769073
CBO1407	CAL82951	3.5.04	Energy metabolism, carbon	Fermentation	NADH-dependent butanol dehydrogenase	bdh, CBO1407	-0.228491	0.432246	0.76261	-2.92428	3.68e-09	3.28e-08
CBO1408	CAL82952	0.0.02	Unknown function	Conserved in other than E.coli	hypothetical protein	CBO1408	-0.105694	0.377392	0.719955	1.41018	8.6e-10	9.33e-09
CBO1409	CAL82953	1.5.03	Transport/binding proteins	Carbohydrates, organic acids and alcohols	C4-dicarboxylate transporter	CBO1409	-0.122564	0.388225	0.726975	-1.05061	0.00180304	0.00484371
CBO1410	CAL82954	3.2.11	Biosynthesis of cofactors, carriers	Pyridine nucleotide	nicotinate phosphoribosyltransferase	CBO1410	-0.282956	0.0363231	0.18463	-0.663643	0.0505065	0.0967759
CBO1411	CAL82955	1.5.0	Transport/binding proteins	Transport/binding proteins	polar amino acid ABC transporter amino acid-binding protein	CBO1411	-1.58522	1.50453e-08	2.4432e-06	-3.40667	1.8e-13	8.61e-12
CBO1412	CAL82956	1.5.0	Transport/binding proteins	Transport/binding proteins	amino acid ABC transporter permease	CBO1412	-0.464935	0.0024545	0.0250334	-1.79695	5.04e-09	4.32e-08
CBO1413	CAL82957	0.0.02	Unknown function	Conserved in other than E.coli	hypothetical protein	CBO1413	0.160809	0.398704	0.737124	-0.670044	0.00193512	0.0051589
CBO1414	CAL82958	2.2.03	Macromolecule synthesis, modification	DNA - replication, repair, restriction/modification	ATP-dependent DNA helicase	CBO1414	0.388351	0.0109567	0.0778447	1.00976	2.45e-07	1.39e-06
CBO1415	CAL82959	5.1.02	Laterally acquired elements	Phage-related functions and prophages	putative phage-related protein (partial)	CBO1415	0.11555	0.293568	0.643273	-0.0639188	0.671541	0.771502
CBO1416	CAL82960	0.0.0	Unknown function	Unknown function, no known homologues	hypothetical protein	CBO1416	-0.023018	0.87106	0.966218	-0.112969	0.424929	0.55364
CBO1417	CAL82961	4.1.06	Cell envelope	G+ membrane	hypothetical protein	CBO1417	-0.414063	0.0124407	0.085643	-0.691568	0.000192437	0.000627383
CBO1418	CAL82962	7.0.0	Not classified	Not classified (included putative assignments)	GNAT family acetyltransferase	CBO1418	-0.179333	0.280543	0.63075	-0.919775	1.45e-05	5.72e-05
CBO1419	CAL82963	0.0.0	Unknown function	Unknown function, no known homologues	hypothetical protein	CBO1419	-0.174832	0.314349	0.663302	-0.76879	0.00481457	0.0117614
CBO1420	CAL82964	0.0.0	Unknown function	Unknown function, no known homologues	hypothetical protein	CBO1420	-0.0818399	0.595541	0.85746	-0.155729	0.317198	0.444857
CBO1421	CAL82965	0.0.0	Unknown function	Unknown function, no known homologues	phage protein	CBO1421	1.14686	2.01476e-06	9.66654e-05	1.67207	2.1e-09	2.02e-08
CBO1422	CAL82966	5.1.02	Laterally acquired elements	Phage-related functions and prophages	bacteriocin UviB	uviB, CBO1422	-0.0825253	0.554195	0.8361	-0.0691838	0.6195	0.729495
CBO1423	CAL82967	4.1.06	Cell envelope	G+ membrane	hypothetical protein	CBO1423	-0.121259	0.383389	0.723083	0.101827	0.381124	0.511894
CBO1424	CAL82968	4.1.09	Cell envelope	G+ peptidoglycan, teichoic acid	N-acetylmuramoyl-L-alanine amidase	CBO1424	0.211012	0.136061	0.429892	0.449139	0.0036731	0.00921545
CBO1425	CAL82969	0.0.02	Unknown function	Conserved in other than E.coli	hypothetical protein	CBO1425	-0.070785	0.588209	0.853856	0.159971	0.228425	0.34419
CBO1426	CAL82970	1.8.01	Differentiation/sporulation/Germination	Differentiation/sporulation/Germination	spore coat protein	CBO1426	-0.044346	0.672433	0.890577	0.11758	0.383134	0.513707
CBO1427	CAL82971	4.1.06	Cell envelope	G+ membrane	phage protein	CBO1427	-0.188383	0.253962	0.598473	-0.667357	0.000528691	0.00158145
CBO1428	CAL82972	7.2.01	Not classified	Cryptic genes	putative helicase (partial)	CBO1428	-0.161259	0.305898	0.655311	0.751445	0.000735738	0.00213898
CBO1429	CAL82973	0.0.0	Unknown function	Unknown function, no known homologues	hypothetical protein	CBO1429	0.0684572	0.642102	0.878675	0.623891	1.36e-05	5.42e-05
CBO1430	CAL82974	1.7.01	Cell division	Cell division	cell division protein FtsA	CBO1430	-1.09112	2.66085e-06	0.000118703	-1.61807	7.94e-09	6.5e-08
CBO1431	CAL82975	2.1.04	Macromolecule degradation	Degradation of proteins, peptides, glycoproteins	amidohydrolase	CBO1431	-0.0553173	0.703946	0.905128	-1.47573	3.2e-07	1.77e-06
CBO1432	CAL82976	4.1.09	Cell envelope	G+ peptidoglycan, teichoic acid	N-acetylmuramoyl-L-alanine amidase	CBO1432	-0.241648	0.378595	0.720392	-1.15097	0.00416872	0.0103345
CBO1433	CAL82977	4.2.02	Ribosome constituents	Ribosomal proteins - synthesis, modification	pseudouridine synthase	rluC, CBO1433	-0.403574	0.12527	0.410532	-0.969641	1.98e-06	9.33e-06
CBO1434	CAL82978	1.8.01	Differentiation/sporulation/Germination	Differentiation/sporulation/Germination	stage V sporulation protein B	CBO1434	0.172871	0.284655	0.634062	-0.669419	0.000155617	0.000515024
CBO1435	CAL82979	1.8.01	Differentiation/sporulation/Germination	Differentiation/sporulation/Germination	polysaccharide biosynthesis family protein	CBO1435	-0.113862	0.474809	0.793719	-0.135305	0.397059	0.526866
CBO1436	CAL82980	0.0.02	Unknown function	Conserved in other than E.coli	hypothetical protein	CBO1436	-1.3612	6.25484e-07	3.90605e-05	-0.698811	0.00132911	0.00366823
CBO1437	CAL82981	0.0.02	Unknown function	Conserved in other than E.coli	hypothetical protein	CBO1437	0.424799	0.0246899	0.142014	1.16991	2.08e-06	9.76e-06
CBO1438	CAL82982	3.5.04	Energy metabolism, carbon	Fermentation	iron-containing alcohol dehydrogenase	CBO1438	0.0887575	0.585589	0.852394	0.808843	3.54e-05	0.000130558
CBO1439	CAL82983	2.1.04	Macromolecule degradation	Degradation of proteins, peptides, glycoproteins	ATP-dependent protease	CBO1439	0.726429	0.000893603	0.0116606	1.51036	1.25e-07	7.6e-07
CBO1440	CAL82984	2.1.04	Macromolecule degradation	Degradation of proteins, peptides, glycoproteins	putative secreted protease (pseudogene)	CBO1440	0.0258647	0.851078	0.959598	-0.109926	0.428632	0.557378
CBO1442	CAL82985	2.1.04	Macromolecule degradation	Degradation of proteins, peptides, glycoproteins	secreted protease	CBO1442	-0.0220275	0.851187	0.959598	0.386193	0.0207217	0.0440791
CBO1443	CAL82986	2.1.04	Macromolecule degradation	Degradation of proteins, peptides, glycoproteins	secreted protease	CBO1443	0.263671	0.168009	0.481427	0.646087	0.00140536	0.00385768
CBO1444	CAL82987	2.1.04	Macromolecule degradation	Degradation of proteins, peptides, glycoproteins	secreted protease	CBO1444	0.212572	0.356233	0.701686	1.12322	8.17e-05	0.00028317
CBO1445	CAL82988	2.1.04	Macromolecule degradation	Degradation of proteins, peptides, glycoproteins	secreted protease	CBO1445	0.318921	0.305635	0.655166	0.77573	0.0136333	0.0302905
CBO1446	CAL82989	2.1.04	Macromolecule degradation	Degradation of proteins, peptides, glycoproteins	secreted protease	CBO1446	0.141353	0.415872	0.750096	1.34792	4.9e-09	4.23e-08
CBO1447	CAL82990	3.2.11	Biosynthesis of cofactors, carriers	Pyridine nucleotide	nicotinate-nucleotide pyrophosphorylase	nadC, CBO1447	-0.244596	0.0425551	0.205112	-0.523199	0.000176643	0.000579741
CBO1447A	CAL82991	3.2.11	Biosynthesis of cofactors, carriers	Pyridine nucleotide	L-aspartate oxidase	nadB, CBO1447A	-0.051556	0.666674	0.888658	-0.293989	0.216898	0.3303
CBO1448	CAL82992	3.2.11	Biosynthesis of cofactors, carriers	Pyridine nucleotide	quinolinate synthetase	nadA, CBO1448	0.0470055	0.745835	0.922882	-0.187611	0.235548	0.353172
CBO1449	CAL82993	4.1.06	Cell envelope	G+ membrane	hypothetical protein	CBO1449	0.0531741	0.755911	0.926309	-0.258998	0.0444261	0.0866982
CBO1450	CAL82994	1.4.01	Protection responses	Cell killing	hemolysin III	CBO1450	0.0464743	0.7798	0.935313	1.40478	4.56e-08	3.05e-07
CBO1451	CAL82995	7.0.0	Not classified	Not classified (included putative assignments)	GTP-dependent nucleic acid-binding protein EngD	ychF, CBO1451	-0.396954	0.0716072	0.292545	-2.12144	4.1e-09	3.62e-08
CBO1453	CAL82996	7.0.0	Not classified	Not classified (included putative assignments)	cell division protein MraZ	mraZ, CBO1453	-1.0652	6.97456e-05	0.00157926	-0.827571	3.09e-05	0.000115389
CBO1454	CAL82997	7.0.0	Not classified	Not classified (included putative assignments)	S-adenosyl-methyltransferase MraW	mraW, CBO1454	-0.399896	0.149869	0.453033	-0.431388	0.0338527	0.0681117
CBO1455	CAL82998	4.1.06	Cell envelope	G+ membrane	cell division protein FtsL	CBO1455	-0.559977	0.1958	0.522787	-0.784937	0.000695516	0.00203181
CBO1456	CAL82999	1.8.01	Differentiation/sporulation/Germination	Differentiation/sporulation/Germination	stage V sporulation protein D	spoVD, CBO1456	-0.173452	0.278152	0.627274	-1.35711	4.69e-08	3.12e-07
CBO1457	CAL83000	4.1.09	Cell envelope	G+ peptidoglycan, teichoic acid	UDP-N-acetylmuramoylalanyl-D-glutamate--2, 6-diaminopimelate ligase	murE, CBO1457	-1.01544	0.000646008	0.00915052	-2.66394	1.88e-09	1.84e-08
CBO1458	CAL83001	4.1.09	Cell envelope	G+ peptidoglycan, teichoic acid	UDP-N-acetylmuramoyl-tripeptide--D-alanyl-D- alanine ligase	murF, CBO1458	-0.403221	0.0151061	0.0986412	-2.80721	6.05e-10	6.95e-09
CBO1459	CAL83002	4.1.09	Cell envelope	G+ peptidoglycan, teichoic acid	phospho-N-acetylmuramoyl-pentapeptide- transferase	mraY2, murX2, CBO1459	0.151362	0.52348	0.819131	0.887772	0.000886117	0.00253958
CBO1460	CAL83003	1.7.01	Cell division	Cell division	cell cycle protein, FtsW/RodA/SpoVE family	ftsW, spoVE, CBO1460	0.214989	0.309629	0.658642	-0.251607	0.236777	0.35436
CBO1461	CAL83004	1.7.01	Cell division	Cell division	cell division protein FtsQ	divIB, CBO1461	0.403707	0.00966455	0.0709822	0.666579	7.33e-05	0.000256169
CBO1462	CAL83005	4.1.06	Cell envelope	G+ membrane	hypothetical protein	CBO1462	-0.0296811	0.832003	0.952455	0.90869	2.75e-06	1.26e-05
CBO1463	CAL83006	4.1.06	Cell envelope	G+ membrane	small basic protein	sbp, CBO1463	-0.234425	0.0704847	0.289613	-0.711606	0.00163743	0.00443668
CBO1464	CAL83007	4.1.06	Cell envelope	G+ membrane	hypothetical protein	CBO1464	-0.255263	0.206162	0.536614	0.413803	0.0220516	0.0465744
CBO1465	CAL83008	7.0.0	Not classified	Not classified (included putative assignments)	hypothetical protein	CBO1465	-0.612188	0.000860072	0.0113173	0.239505	0.0440604	0.0860271
CBO1466	CAL83009	0.0.02	Unknown function	Conserved in other than E.coli	hypothetical protein	CBO1466	-0.559357	0.00240692	0.0246921	0.166869	0.689761	0.786464
CBO1467	CAL83010	4.1.06	Cell envelope	G+ membrane	hypothetical protein	CBO1467	-0.420896	0.026029	0.146606	-0.330807	0.0462901	0.0898677
CBO1468	CAL83011	0.0.02	Unknown function	Conserved in other than E.coli	hypothetical protein	CBO1468	-0.291907	0.316397	0.665838	-0.639147	0.000579403	0.00172266
CBO1469	CAL83012	1.7.01	Cell division	Cell division	cell-division initiation protein DivIVA	divIVA, CBO1469	0.276081	0.1484	0.45041	-0.72957	0.000807812	0.00232831
CBO1470	CAL83013	3.1.05	Amino acid biosynthesis	Chorismate	3-dehydroquinate synthase	aroB, CBO1470	-0.121915	0.337543	0.684429	0.814501	2.81e-06	1.28e-05
CBO1471	CAL83014	3.1.14	Amino acid biosynthesis	Methionine	5'-methylthioadenosine/S-adenosylhomocysteine nucleosidase	mtnN, mtn, pfs, CBO1471	-0.0738774	0.606751	0.863651	0.676033	0.0136052	0.030245
CBO1472	CAL83015	2.2.05	Macromolecule synthesis, modification	Lipopolysaccharide	3-deoxy-7-phosphoheptulonate synthase	CBO1472	0.221794	0.071653	0.29258	1.80682	6.63e-09	5.53e-08
CBO1473	CAL83016	3.1.05	Amino acid biosynthesis	Chorismate	3-phosphoshikimate 1-carboxyvinyltransferase	aroA, CBO1473	0.334028	0.0789886	0.312322	0.721145	0.000759404	0.00220128
CBO1474	CAL83017	7.0.0	Not classified	Not classified (included putative assignments)	RNA polymerase-binding protein DksA	CBO1474	0.303198	0.0507014	0.231742	0.253378	0.0660155	0.122265
CBO1475	CAL83018	2.2.06	Macromolecule synthesis, modification	Lipoprotein	lipoprotein signal peptidase	lspA, CBO1475	-0.377637	0.0417579	0.20251	-0.299746	0.0885933	0.157732
CBO1476	CAL83019	2.2.11	Macromolecule synthesis, modification	RNA synthesis, modification, DNA transcription	pseudouridine synthase	rluD1, CBO1476	-0.762136	0.00237206	0.0244301	-1.2959	6.86e-06	2.89e-05
CBO1478	CAL83020	6.5.0	Regulation	Others	bifunctional pyrimidine regulatory protein PyrR/uracil phosphoribosyltransferase	pyrR, CBO1478	-0.895656	0.00246128	0.0250863	-2.41798	1.44e-08	1.09e-07
CBO1479	CAL83021	1.5.01	Transport/binding proteins	Amino acids and amines	uracil permease	pyrP, CBO1479	-0.823981	0.000828964	0.0110811	-2.81269	1.49e-11	3.03e-10
CBO1480	CAL83022	2.1.01	Macromolecule degradation	Degradation of DNA	exodeoxyribonuclease III	exoA, CBO1480	-0.368679	0.0255064	0.145033	-0.987544	2.48e-07	1.4e-06
CBO1481	CAL83023	2.2.11	Macromolecule synthesis, modification	RNA synthesis, modification, DNA transcription	methyltransferase	CBO1481	-0.697375	0.00217454	0.022814	-1.80386	8.37e-09	6.78e-08
CBO1482	CAL83024	0.0.0	Unknown function	Unknown function, no known homologues	hypothetical protein	CBO1482	-0.530485	0.00413181	0.0373477	-1.69229	1.68e-09	1.67e-08
CBO1483	CAL83025	1.5.05	Transport/binding proteins	Other	molybdate ABC transporter periplasmic molybdate-binding protein	modA, CBO1483	-0.328018	0.0256053	0.145211	-1.19375	4.06e-08	2.74e-07
CBO1484	CAL83026	1.5.05	Transport/binding proteins	Other	molybdate ABC transporter permease	modB, CBO1484	-0.395364	0.0343241	0.177742	-1.68263	9.05e-09	7.26e-08
CBO1485	CAL83027	1.5.05	Transport/binding proteins	Other	molybdate ABC transporter ATP-binding protein	modC, CBO1485	-0.398884	0.00439193	0.0390264	-1.78997	8.68e-10	9.4e-09
CBO1486	CAL83028	4.1.06	Cell envelope	G+ membrane	hypothetical protein	CBO1486	0.164584	0.287209	0.635447	-1.07858	3.02e-07	1.68e-06
CBO1487	CAL83029	7.0.0	Not classified	Not classified (included putative assignments)	patatin-like phospholipase	CBO1487	0.17301	0.173574	0.491019	-0.0694619	0.579081	0.695277
CBO1488	CAL83030	0.0.02	Unknown function	Conserved in other than E.coli	hypothetical protein	CBO1488	0.126689	0.413344	0.747433	-0.132339	0.393213	0.523519
CBO1489	CAL83031	3.5.0	Energy metabolism, carbon	Energy metabolism, carbon	methylcobamide:CoM methyltransferase	CBO1489	-1.60037	2.22848e-05	0.00063763	-6.09181	1.21e-14	1.05e-12
CBO1490	CAL83032	1.5.0	Transport/binding proteins	Transport/binding proteins	Na+/H+ antiporter	CBO1490	-0.242397	0.235687	0.577117	-1.25384	3.21e-05	0.000119409
CBO1491	CAL83033	3.5.0	Energy metabolism, carbon	Energy metabolism, carbon	(Fe-S)-binding protein	CBO1491	-0.116294	0.66919	0.88941	-2.95602	1.79e-10	2.43e-09
CBO1492	CAL83034	3.5.0	Energy metabolism, carbon	Energy metabolism, carbon	CobW/P47K family protein	cobW, CBO1492	0.0784161	0.740663	0.921117	-3.49242	6.48e-12	1.51e-10
CBO1493	CAL83035	3.5.0	Energy metabolism, carbon	Energy metabolism, carbon	methylcobalamin:coenzyme M methyltransferase	CBO1493	-0.10205	0.561523	0.840949	-3.23729	1.74e-11	3.45e-10
CBO1494	CAL83036	3.5.0	Energy metabolism, carbon	Energy metabolism, carbon	dimethylamine corrinoid protein	mtbC, CBO1494	-0.112569	0.599627	0.859547	-2.49595	3.56e-10	4.38e-09
CBO1495	CAL83037	3.5.0	Energy metabolism, carbon	Energy metabolism, carbon	methylcobalamin:coenzyme M methyltransferase	mtbA, CBO1495	-0.0589837	0.663237	0.887607	-2.73224	2.53e-11	4.73e-10
CBO1496	CAL83038	0.0.0	Unknown function	Unknown function, no known homologues	hypothetical protein	CBO1496	0.0671386	0.550358	0.835054	0.0462384	0.756754	0.836661
CBO1497	CAL83039	0.0.0	Unknown function	Unknown function, no known homologues	hypothetical protein	CBO1497	0.455606	0.0345802	0.178591	-3.22279	1.35e-10	1.91e-09
CBO1498	CAL83040	3.5.0	Energy metabolism, carbon	Energy metabolism, carbon	methylcobamide:CoM methyltransferase	CBO1498	-0.256623	0.300313	0.650226	-3.97513	1.16e-12	3.74e-11
CBO1499	CAL83041	1.5.01	Transport/binding proteins	Amino acids and amines	D-methionine ABC transporter ATP-binding protein	metN2, CBO1499	0.271582	0.202934	0.532885	-3.94408	2.88e-11	5.27e-10
CBO1500	CAL83042	1.5.01	Transport/binding proteins	Amino acids and amines	methionine ABC transporter permease	metI2, CBO1500	-0.522552	0.00517834	0.0438982	-2.40944	1.02e-11	2.2e-10
CBO1501	CAL83043	1.5.01	Transport/binding proteins	Amino acids and amines	lipoprotein, NLPA family	metQ3, CBO1501	0.216531	0.32742	0.67664	-1.59151	1.06e-07	6.54e-07
CBO1502	CAL83044	0.0.02	Unknown function	Conserved in other than E.coli	MORN repeat protein	CBO1502	0.442806	0.0218627	0.130077	3.80159	4.57e-13	1.78e-11
CBO1503	CAL83045	7.0.0	Not classified	Not classified (included putative assignments)	FAD/FMN-binding oxidoreductase	CBO1503	0.0657857	0.785581	0.937228	1.0521	0.00030319	0.000950838
CBO1504	CAL83046	3.1.03	Amino acid biosynthesis	Asparagine	asparagine synthetase AsnA	asnA, CBO1504	-0.18	0.194783	0.521492	1.54543	9.79e-10	1.05e-08
CBO1505	CAL83047	7.0.0	Not classified	Not classified (included putative assignments)	oxidoreductase, FAD dependent	CBO1505	0.0753122	0.578804	0.849765	-0.0567524	0.665151	0.766443
CBO1506	CAL83048	2.2.03	Macromolecule synthesis, modification	DNA - replication, repair, restriction/modification	DNA topoisomerase	CBO1506	-0.16229	0.43685	0.765108	-0.61912	0.0101959	0.0232641
CBO1507	CAL83049	2.2.03	Macromolecule synthesis, modification	DNA - replication, repair, restriction/modification	mutS domain protein	CBO1507	0.108293	0.505492	0.809161	0.307387	0.116737	0.198497
CBO1508	CAL83050	7.0.0	Not classified	Not classified (included putative assignments)	oxidoreductase, aldo/keto reductase	CBO1508	0.0521653	0.792125	0.939403	-0.184576	0.15796	0.2554
CBO1509	CAL83051	0.0.02	Unknown function	Conserved in other than E.coli	hypothetical protein	CBO1509	0.0241274	0.896526	0.973883	1.06416	1.81e-05	7.03e-05
CBO1510	CAL83052	1.5.0	Transport/binding proteins	Transport/binding proteins	peptide ABC transporter Pep4E family, ATP-binding protein	CBO1510	-0.139069	0.779436	0.93505	1.58495	0.00436182	0.010764
CBO1511	CAL83053	1.5.0	Transport/binding proteins	Transport/binding proteins	ABC transporter, permease protein (pseudogene)	CBO1511	-0.182863	0.657688	0.885376	1.51285	0.00145132	0.00397484
CBO1513	CAL83054	6.3.08	Regulation	TetR	TetR family transcriptional regulator	CBO1513	0.174372	0.724827	0.915504	1.59154	0.00413792	0.0102775
CBO1514	CAL83055	0.0.02	Unknown function	Conserved in other than E.coli	hypothetical protein	CBO1514	-0.934997	2.95219e-05	0.000795524	-3.61005	2.95e-13	1.3e-11
CBO1515	CAL83056	1.5.0	Transport/binding proteins	Transport/binding proteins	carbohydrate uptake ABC transporter CUT1 family, ATP-binding protein	CBO1515	-0.602269	0.00652003	0.0528079	-3.11294	2.48e-12	6.99e-11
CBO1516	CAL83057	1.5.0	Transport/binding proteins	Transport/binding proteins	carbohydrate uptake ABC transporter CUT1 family, permease	CBO1516	-0.861754	0.025467	0.144998	-1.62705	0.00020774	0.00067323
CBO1517	CAL83058	1.5.0	Transport/binding proteins	Transport/binding proteins	carbohydrate uptake ABC transporter CUT1 family, permease	CBO1517	-0.09937	0.577706	0.849653	-1.65541	1.04e-08	8.16e-08
CBO1518	CAL83059	1.5.0	Transport/binding proteins	Transport/binding proteins	carbohydrate uptake ABC transporter CUT1 family, carbohydrate-binding protein	CBO1518	0.0695974	0.731992	0.918006	-2.82659	1.77e-11	3.48e-10
CBO1519	CAL83060	3.5.05	Energy metabolism, carbon	Glycolysis	L-lactate dehydrogenase	ldh, CBO1519	-0.0366206	0.797986	0.942856	0.126294	0.381918	0.512688
CBO1520	CAL83061	6.3.03	Regulation	GntR	GntR family transcriptional regulator	CBO1520	-0.440988	0.0182323	0.11314	-0.221271	0.0962292	0.169183
CBO1521	CAL83062	0.0.02	Unknown function	Conserved in other than E.coli	redox family protein	CBO1521	-1.25177	0.000321293	0.0053512	-4.3247	5.14e-12	1.24e-10
CBO1522	CAL83063	1.5.0	Transport/binding proteins	Transport/binding proteins	C4-dicarboxylate transporter/malic acid transport protein	CBO1522	-0.432006	0.083485	0.323051	-2.907	4.47e-11	7.56e-10
CBO1523	CAL83064	0.0.0	Unknown function	Unknown function, no known homologues	hypothetical protein	CBO1523	-0.206253	0.456761	0.780461	-0.250393	0.105578	0.182821
CBO1524	CAL83065	6.5.0	Regulation	Others	sensory box-containing diguanylate cyclase	CBO1524	0.0762195	0.572736	0.845715	0.0647799	0.611401	0.722886
CBO1525	CAL83066	0.0.02	Unknown function	Conserved in other than E.coli	hypothetical protein	CBO1525	0.206179	0.126996	0.413603	0.0421072	0.953808	0.970142
CBO1526	CAL83067	1.1.01	Cell processes	Chemotaxis and mobility	methyl-accepting chemotaxis protein	CBO1526	-0.0833063	0.593343	0.857234	-1.63888	1.15e-09	1.2e-08
CBO1527	CAL83068	6.3.07	Regulation	MarR	MarR family transcriptional regulator	CBO1527	-0.137509	0.475988	0.794508	-0.296904	0.0594537	0.111604
CBO1528	CAL83069	0.0.02	Unknown function	Conserved in other than E.coli	hypothetical protein	CBO1528	-0.25643	0.178217	0.498331	-0.37782	0.00462354	0.011344
CBO1529	CAL83070	6.5.0	Regulation	Others	transcriptional regulator	CBO1529	-0.0658817	0.529064	0.822695	-0.513837	0.00167767	0.00453477
CBO1530	CAL83071	0.0.0	Unknown function	Unknown function, no known homologues	hypothetical protein	CBO1530	-0.0503942	0.634625	0.875434	0.166722	0.263751	0.385819
CBO1531	CAL83072	7.0.0	Not classified	Not classified (included putative assignments)	glyoxalase	CBO1531	-0.526692	0.00202875	0.0216157	-0.776356	4.44e-05	0.000161416
CBO1532	CAL83073	2.2.03	Macromolecule synthesis, modification	DNA - replication, repair, restriction/modification	methylated-DNA--protein-cysteine methyltransferase	ogt, CBO1532	-0.463232	0.0978324	0.355317	-1.84889	1.31e-06	6.4e-06
CBO1533	CAL83074	6.3.02	Regulation	AraC	AraC family transcriptional regulator	CBO1533	0.188186	0.404676	0.74051	-0.997566	7.41e-05	0.000258846
CBO1534	CAL83075	0.0.02	Unknown function	Conserved in other than E.coli	hypothetical protein	CBO1534	-0.459284	0.137398	0.432014	0.388932	0.0615328	0.114869
CBO1535	CAL83076	0.0.02	Unknown function	Conserved in other than E.coli	hypothetical protein	CBO1535	0.0447111	0.877818	0.968875	-0.935447	0.00414596	0.0102926
CBO1536	CAL83077	6.5.0	Regulation	Others	DNA-binding protein	CBO1536	-0.0579053	0.682032	0.896138	0.513666	0.00387636	0.00968444
CBO1537	CAL83078	1.5.02	Transport/binding proteins	Cations	cation-transporting ATPase	CBO1537	0.0433278	0.745113	0.922882	0.714053	3.1e-05	0.00011564
CBO1538	CAL83079	1.5.02	Transport/binding proteins	Cations	cation efflux family protein	CBO1538	0.154071	0.318358	0.667915	-0.1024	0.537521	0.658633
CBO1539	CAL83080	1.5.0	Transport/binding proteins	Transport/binding proteins	transporter	CBO1539	0.131716	0.420027	0.752459	-0.140396	0.31408	0.441665
CBO1541	CAL83081	6.5.0	Regulation	Others	iron-dependent repressor	CBO1541	0.0841711	0.64089	0.877838	0.456837	0.000896816	0.00256744
CBO1542	CAL83082	0.0.0	Unknown function	Unknown function, no known homologues	hypothetical protein	CBO1542	-0.215532	0.284255	0.634062	-0.894884	1.03e-06	5.13e-06
CBO1543	CAL83083	7.0.0	Not classified	Not classified (included putative assignments)	HDIG domain protein	CBO1543	-1.18477	3.67291e-06	0.000152107	-2.3307	1.52e-11	3.06e-10
CBO1544	CAL83084	0.0.0	Unknown function	Unknown function, no known homologues	hypothetical protein	CBO1544	-0.611078	0.0170509	0.107763	-2.44092	8.71e-09	7.03e-08
CBO1545	CAL83085	1.5.02	Transport/binding proteins	Cations	cation-transporting ATPase, P-type	CBO1545	0.165852	0.315355	0.6648	-0.691102	0.000393648	0.00120804
CBO1546	CAL83086	7.0.0	Not classified	Not classified (included putative assignments)	glyoxalase	CBO1546	0.0681658	0.734411	0.919109	0.073037	0.63912	0.745356
CBO1547	CAL83087	1.4.03	Protection responses	Drug/analogue sensitivity	chloramphenicol acetyltransferase	CBO1547	-0.0646805	0.643379	0.879074	0.517716	0.0171925	0.0373803
CBO1548	CAL83088	6.5.0	Regulation	Others	cyclic nucleotide-binding domain-containing protein	CBO1548	-0.0686487	0.675235	0.891682	0.606152	0.0013463	0.00370786
CBO1549	CAL83089	6.3.11	Regulation	LuxR	LuxR-family tanscriptional regulator (partial)	CBO1549	0.0588511	0.534094	0.82467	-0.129083	0.180946	0.285535
CBO1550	CAL83090	0.0.02	Unknown function	Conserved in other than E.coli	transcription activator, effector binding domain-containing protein	CBO1550	0.233811	0.0505138	0.231086	0.770682	1.02e-05	4.15e-05
CBO1551	CAL83091	6.3.10	Regulation	DeoR	DeoR family transcriptional regulator	CBO1551	-0.211996	0.0754401	0.303244	-0.273076	0.0256036	0.053318
CBO1552	CAL83092	3.5.04	Energy metabolism, carbon	Fermentation	2-hydroxyglutaryl-CoA dehydratase subunit	CBO1552	-0.342152	0.0156452	0.101362	-1.80694	1.98e-11	3.83e-10
CBO1553	CAL83093	3.5.04	Energy metabolism, carbon	Fermentation	2-hydroxyglutaryl-CoA dehydratase	CBO1553	-0.270154	0.0701953	0.288876	-1.35127	1.08e-08	8.48e-08
CBO1554	CAL83094	0.0.02	Unknown function	Conserved in other than E.coli	6-pyruvoyl tetrahydrobiopterin synthase	CBO1554	-0.258487	0.232759	0.573609	-2.23882	4.21e-12	1.06e-10
CBO1555	CAL83095	7.0.0	Not classified	Not classified (included putative assignments)	radical SAM domain protein	CBO1555	-0.184539	0.183905	0.506052	-1.939	6.66e-11	1.06e-09
CBO1556	CAL83096	3.2.05	Biosynthesis of cofactors, carriers	Folic acid	GTP cyclohydrolase I	folE, mtrA, CBO1556	-0.164263	0.281896	0.632079	-1.78823	2.61e-10	3.35e-09
CBO1557	CAL83097	0.0.02	Unknown function	Conserved in other than E.coli	hypothetical protein	CBO1557	-0.452804	0.0138886	0.0924557	-3.32055	7.11e-11	1.12e-09
CBO1558	CAL83098	1.1.01	Cell processes	Chemotaxis and mobility	methyl-accepting chemotaxis protein	CBO1558	-0.774141	0.00036629	0.00591818	-1.70104	1.25e-08	9.61e-08
CBO1559	CAL83099	4.1.06	Cell envelope	G+ membrane	hypothetical protein	CBO1559	-0.00442325	0.973307	0.993251	-1.52905	4.44e-09	3.89e-08
CBO1560	CAL83100	0.0.02	Unknown function	Conserved in other than E.coli	hypothetical protein	CBO1560	-0.976781	1.17656e-06	6.27773e-05	-0.516447	0.00151702	0.00413561
CBO1561	CAL83101	6.3.10	Regulation	DeoR	DeoR family transcriptional regulator	deoR, CBO1561	-0.175831	0.33115	0.679728	-1.73507	1.77e-07	1.04e-06
CBO1563	CAL83102	3.4.05	Degradation of small molecules	Other	deoxyribose-phosphate aldolase	deoC, dra, CBO1563	-0.305427	0.01145	0.0806933	0.559574	6.06e-05	0.000214908
CBO1564	CAL83103	3.4.03	Degradation of small molecules	Carbon compounds	ribokinase	rbsK, CBO1564	0.299259	0.0830802	0.322477	1.0643	3.21e-06	1.45e-05
CBO1565	CAL83104	3.1.10	Amino acid biosynthesis	Histidine	ATP phosphoribosyltransferase	hisZ, CBO1565	-0.124794	0.361659	0.706221	-0.301701	0.0385909	0.0764387
CBO1566	CAL83105	3.1.10	Amino acid biosynthesis	Histidine	ATP phosphoribosyltransferase	hisG, CBO1566	0.108074	0.4254	0.757471	-0.116298	0.575198	0.69167
CBO1567	CAL83106	3.1.10	Amino acid biosynthesis	Histidine	histidinol dehydrogenase	hisD, CBO1567	-0.167155	0.274884	0.623561	-0.0888507	0.557113	0.675497
CBO1568	CAL83107	3.1.10	Amino acid biosynthesis	Histidine	imidazoleglycerol-phosphate dehydratase	hisB, CBO1568	-0.0768338	0.661108	0.887007	-0.488842	0.00294066	0.00756534
CBO1569	CAL83108	3.1.10	Amino acid biosynthesis	Histidine	imidazole glycerol phosphate synthase subunit HisH	hisH, CBO1569	-0.186554	0.201235	0.531348	-0.488737	0.0025896	0.0067404
CBO1570	CAL83109	3.1.10	Amino acid biosynthesis	Histidine	1-(5-phosphoribosyl)-5-[(5- phosphoribosylamino)methylideneamino] imidazole-4-carboxamide isomerase	hisA, CBO1570	-0.140931	0.2469	0.591594	-0.351661	0.0122635	0.0275347
CBO1571	CAL83110	3.1.10	Amino acid biosynthesis	Histidine	histidinol-phosphate aminotransferase	hisC, CBO1571	-0.13307	0.355356	0.70089	-0.334114	0.0167	0.0363899
CBO1572	CAL83111	3.1.10	Amino acid biosynthesis	Histidine	imidazole glycerol phosphate synthase subunit HisF	hisF, CBO1572	-0.0862734	0.55634	0.837098	-0.540536	0.00136212	0.00374619
CBO1573	CAL83112	3.1.10	Amino acid biosynthesis	Histidine	phosphoribosyl-AMP cyclohydrolase	hisI, CBO1573	-0.175693	0.254646	0.598865	-0.297872	0.0610528	0.114108
CBO1574	CAL83113	3.1.10	Amino acid biosynthesis	Histidine	phosphoribosyl-ATP pyrophosphatase	hisE, CBO1574	0.0511918	0.661922	0.887356	-0.504256	0.00247534	0.00645755
CBO1575	CAL83114	4.1.06	Cell envelope	G+ membrane	hypothetical protein	CBO1575	0.13453	0.323533	0.67323	-0.209967	0.179552	0.283752
CBO1576	CAL83115	0.0.02	Unknown function	Conserved in other than E.coli	hypothetical protein	CBO1576	-0.0763077	0.515966	0.815203	-0.427621	0.0015009	0.00409709
CBO1577	CAL83116	4.1.06	Cell envelope	G+ membrane	hypothetical protein	CBO1577	-0.16663	0.301728	0.651433	-0.357523	0.100046	0.174722
CBO1578	CAL83117	6.3.06	Regulation	LysR	LysR family transcriptional regulator	CBO1578	-0.737829	6.17088e-05	0.00143868	-1.36446	2.9e-07	1.62e-06
CBO1579	CAL83118	1.5.0	Transport/binding proteins	Transport/binding proteins	sodium:alanine symporter family protein	CBO1579	-0.0970135	0.645684	0.880521	-1.20668	5.56e-06	2.39e-05
CBO1580	CAL83119	7.0.0	Not classified	Not classified (included putative assignments)	pyridine nucleotide-disulfide oxidoreductase	CBO1580	0.048606	0.818501	0.948893	-1.48051	5.23e-07	2.78e-06
CBO1581	CAL83120	4.1.06	Cell envelope	G+ membrane	hypothetical protein	CBO1581	0.452176	0.0673818	0.2806	-0.749062	0.00458965	0.0112714
CBO1582	CAL83121	1.4.01	Protection responses	Cell killing	antibiotic ABC transporter ATP-binding protein	CBO1582	0.421712	0.03816	0.190488	1.99856	2.33e-09	2.21e-08
CBO1583	CAL83122	1.4.01	Protection responses	Cell killing	antibiotic ABC transporter permease	CBO1583	0.292451	0.090445	0.338566	1.83262	3.21e-08	2.22e-07
CBO1584	CAL83123	1.4.01	Protection responses	Cell killing	antibiotic ABC transporter permease	CBO1584	0.282105	0.0730205	0.296701	1.39272	4.94e-08	3.27e-07
CBO1585	CAL83124	6.1.02	Regulation	Response regulator	antibiotic ABC transporter	CBO1585	0.260793	0.117788	0.395822	1.36743	6.87e-09	5.68e-08
CBO1586	CAL83125	6.1.01	Regulation	Sensor kinase	antibiotic ABC transporter	CBO1586	0.158471	0.268949	0.617426	0.5624	0.0179052	0.0387532
CBO1587	CAL83126	3.4.02	Degradation of small molecules	Amino acids	arginine deiminase	arcA2, CBO1587	0.236743	0.485021	0.798838	-2.23968	5.07e-05	0.000182813
CBO1588	CAL83127	1.5.01	Transport/binding proteins	Amino acids and amines	arginine/ornithine antiporter	arcD, CBO1588	0.379558	0.111803	0.385674	-2.0306	1.77e-11	3.48e-10
CBO1589	CAL83128	1.4.01	Protection responses	Cell killing	hemolysin	CBO1589	2.0662	6.23968e-09	1.27524e-06	6.51374	9.93e-18	4.46e-15
CBO1590	CAL83129	0.0.02	Unknown function	Conserved in other than E.coli	hypothetical protein	CBO1590	-0.649026	0.0502747	0.230394	-0.159309	0.613684	0.72466
CBO1591	CAL83130	6.1.02	Regulation	Response regulator	putative two-component response regulator (partial)	CBO1591	-0.25793	0.195186	0.521944	0.919099	7.76e-05	0.000270026
CBO1592	CAL83131	7.0.0	Not classified	Not classified (included putative assignments)	HD domain-containing protein	CBO1592	-0.11686	0.466875	0.787819	-0.470287	0.0200568	0.0428326
CBO1594	CAL83132	0.0.0	Unknown function	Unknown function, no known homologues	hypothetical protein	CBO1594	-0.330189	0.0355284	0.182061	-0.343627	0.0142013	0.0314061
CBO1595	CAL83133	2.2.03	Macromolecule synthesis, modification	DNA - replication, repair, restriction/modification	Snf2 family helicase	CBO1595	-0.465633	0.0012145	0.0146907	0.0333419	0.788337	0.859265
CBO1596	CAL83134	7.0.0	Not classified	Not classified (included putative assignments)	RelA/SpoT domain-containing protein	CBO1596	-0.967327	8.9514e-06	0.000300359	-0.713286	0.00269176	0.00697633
CBO1597	CAL83135	0.0.02	Unknown function	Conserved in other than E.coli	hypothetical protein	CBO1597	0.230661	0.104141	0.369032	0.310431	0.0588904	0.110631
CBO1598	CAL83136	6.3.02	Regulation	AraC	AraC family transcriptional regulator	CBO1598	-0.115043	0.520324	0.817822	0.258385	0.157696	0.255026
CBO1599	CAL83137	1.5.0	Transport/binding proteins	Transport/binding proteins	ABC transporter permease ATP-binding protein	CBO1599	0.0406888	0.828067	0.951518	1.24847	1.29e-08	9.88e-08
CBO1600	CAL83138	1.5.0	Transport/binding proteins	Transport/binding proteins	ABC transporter ATP-binding protein/permease	CBO1600	0.0213125	0.898024	0.974107	0.932155	1.83e-05	7.1e-05
CBO1601	CAL83139	6.3.05	Regulation	LacI	LacI family transcriptional regulator	CBO1601	-0.223574	0.307077	0.656458	-0.63258	0.00334445	0.0084753
CBO1602	CAL83140	3.4.03	Degradation of small molecules	Carbon compounds	glucokinase	glcK, CBO1602	-0.107416	0.406621	0.741713	-1.23659	8.52e-08	5.36e-07
CBO1604	CAL83141	2.1.03	Macromolecule degradation	Degradation of polysaccharides	glycosyl hydrolase family protein	malL, CBO1604	-0.0229801	0.877631	0.968832	-0.5408	0.000540931	0.00161414
CBO1605	CAL83142	1.5.03	Transport/binding proteins	Carbohydrates, organic acids and alcohols	PTS system, glucose/glucoside family, IIBC component	CBO1605	-0.106533	0.510994	0.811651	-0.552572	0.00255635	0.00665938
CBO1606	CAL83143	7.0.0	Not classified	Not classified (included putative assignments)	hypothetical protein	CBO1606	0.0548048	0.650881	0.883391	-0.428065	0.0368503	0.0734531
CBO1607	CAL83144	4.1.06	Cell envelope	G+ membrane	hypothetical protein	CBO1607	-0.062156	0.569275	0.843647	-0.106015	0.415533	0.544651
CBO1608	CAL83145	0.0.02	Unknown function	Conserved in other than E.coli	hypothetical protein	CBO1608	0.043742	0.809474	0.946046	0.122163	0.438134	0.566521
CBO1609	CAL83146	0.0.0	Unknown function	Unknown function, no known homologues	hypothetical protein	CBO1609	0.132813	0.37613	0.71878	-0.117773	0.431525	0.560353
CBO1610	CAL83147	0.0.02	Unknown function	Conserved in other than E.coli	hypothetical protein	CBO1610	0.103633	0.387753	0.726696	-0.0481527	0.685841	0.783243
CBO1612	CAL83148	6.1.01	Regulation	Sensor kinase	sensor histidine kinase	CBO1612	-0.0454769	0.771719	0.93215	-0.420128	0.00966375	0.0221624
CBO1613	CAL83149	6.1.02	Regulation	Response regulator	DNA-binding response regulator	CBO1613	-0.0729698	0.696885	0.90244	0.381931	0.0523999	0.099881
CBO1614	CAL83150	1.5.0	Transport/binding proteins	Transport/binding proteins	major facilitator transporter	CBO1614	-0.324827	0.0359732	0.183603	-0.48851	0.00305415	0.00781896
CBO1615	CAL83151	7.0.0	Not classified	Not classified (included putative assignments)	HAD-superfamily hydrolase	CBO1615	0.124668	0.416959	0.750231	1.92297	5.72e-09	4.84e-08
CBO1616	CAL83152	6.3.10	Regulation	DeoR	DeoR family transcriptional regulator	CBO1616	-0.0921251	0.557152	0.837638	2.73277	2.23e-11	4.25e-10
CBO1618	CAL83153	6.2.01	Regulation	sigma factor	RNA polymerase sigma factor	CBO1618	0.0236126	0.849597	0.959221	0.363307	0.0631598	0.117556
CBO1619	CAL83154	0.0.02	Unknown function	Conserved in other than E.coli	hypothetical protein	CBO1619	-0.0832911	0.662895	0.887607	0.0934189	0.625123	0.734089
CBO1620	CAL83155	2.1.04	Macromolecule degradation	Degradation of proteins, peptides, glycoproteins	collagenase	colA, CBO1620	0.55008	0.0184036	0.113933	-1.45923	1.63e-06	7.78e-06
CBO1621	CAL83156	3.1.14	Amino acid biosynthesis	Methionine	5,10-methylenetetrahydrofolate reductase	metF, CBO1621	-0.259488	0.0541399	0.242366	-0.0550702	0.694391	0.790711
CBO1622	CAL83157	0.0.02	Unknown function	Conserved in other than E.coli	hypothetical protein	CBO1622	-0.416961	0.0129857	0.0885041	-0.214064	0.0525552	0.100153
CBO1623	CAL83158	3.1.14	Amino acid biosynthesis	Methionine	5-methyltetrahydrofolate--homocysteine methyltransferase	metH, CBO1623	-0.134606	0.401975	0.73887	-1.30673	8.64e-05	0.000298423
CBO1624	CAL83159	0.0.02	Unknown function	Conserved in other than E.coli	hypothetical protein	CBO1624	0.888144	0.000131655	0.00263832	3.06438	1.15e-12	3.73e-11
CBO1625	CAL83160	6.2.01	Regulation	sigma factor	RNA polymerase factor sigma-70	CBO1625	0.362666	0.0206436	0.124867	0.868675	8.32e-06	3.44e-05
CBO1626	CAL83161	4.1.06	Cell envelope	G+ membrane	hypothetical protein	CBO1626	0.348718	0.0253851	0.144689	0.920571	1.45e-06	7.04e-06
CBO1628	CAL83163	6.5.0	Regulation	Others	signal-transduction and transcriptional-control protein	acoR, CBO1628	0.282149	0.13981	0.436863	2.55757	5.44e-13	2.06e-11
CBO1629	CAL83164	0.0.02	Unknown function	Conserved in other than E.coli	hypothetical protein	CBO1629	0.0488013	0.700813	0.903992	0.0777883	0.677818	0.776503
CBO1630	CAL83165	3.4.03	Degradation of small molecules	Carbon compounds	TPP-dependent acetoin dehydrogenase complex, E1 component subunit alpha	acoA, CBO1630	0.0965113	0.602655	0.861236	-0.0298094	0.838161	0.894489
CBO1631	CAL83166	3.4.03	Degradation of small molecules	Carbon compounds	TPP-dependent acetoin dehydrogenase complex, E1 component subunit beta	acoB, CBO1631	-0.268461	0.118636	0.398192	0.172097	0.314243	0.441776
CBO1632	CAL83167	3.4.03	Degradation of small molecules	Carbon compounds	acetoin catabolism protein X	acoX, CBO1632	0.106229	0.398384	0.736619	-0.0779533	0.584091	0.699798
CBO1633	CAL83168	3.4.03	Degradation of small molecules	Carbon compounds	TPP-dependent acetoin dehydrogenase complex, E2 component, dihydrolipoamide acetyltransferase	acoC, pdhC, CBO1633	0.0326623	0.838469	0.954305	0.180232	0.268348	0.390584
CBO1634	CAL83169	3.4.03	Degradation of small molecules	Carbon compounds	TPP-dependent acetoin dehydrogenase complex, E3 component, dihydrolipoamide dehydrogenase	acoL, CBO1634	-0.129723	0.407443	0.742636	-0.0706541	0.655731	0.758712
CBO1635	CAL83170	3.4.03	Degradation of small molecules	Carbon compounds	lipoate-protein ligase A	lplA2, CBO1635	0.046907	0.763235	0.92868	-0.162227	0.303855	0.430674
CBO1636	CAL83171	1.6.02	Adaptation	Osmotic adaptation	glycine betaine/L-proline ABC transporter ATP-binding protein	opuCA, opuBA, proV, CBO1636	2.69426	2.77796e-07	2.12217e-05	5.34354	7.14e-13	2.56e-11
CBO1637	CAL83172	1.6.02	Adaptation	Osmotic adaptation	glycine betaine/L-proline ABC transporter permease/substrate-binding protein	opuCB, opuBB, CBO1637	2.25036	1.1649e-07	1.0791e-05	4.80252	3.84e-13	1.6e-11
CBO1638	CAL83173	3.1.18	Amino acid biosynthesis	Threonine	threonine synthase	thrC, CBO1638	-0.0566062	0.673685	0.890853	0.778248	3.11e-07	1.73e-06
CBO1639	CAL83174	3.1.18	Amino acid biosynthesis	Threonine	homoserine kinase	thrB, CBO1639	0.0160616	0.907739	0.977962	0.580562	0.000443592	0.00134717
CBO1640	CAL83175	3.1.13	Amino acid biosynthesis	Lysine	aspartate kinase	lysC, apk, CBO1640	0.0896732	0.486414	0.799268	0.538164	0.000693859	0.00202809
CBO1641	CAL83176	3.1.13	Amino acid biosynthesis	Lysine	homoserine dehydrogenase	hom, tdm, CBO1641	0.0429773	0.746903	0.923138	-0.0918615	0.618163	0.728594
CBO1642	CAL83177	6.5.0	Regulation	Others	signal-transduction and transcriptional-control protein	CBO1642	0.296665	0.104665	0.370381	-0.15755	0.376712	0.507708
CBO1643	CAL83178	3.5.04	Energy metabolism, carbon	Fermentation	NADH-dependent butanol dehydrogenase	CBO1643	-0.369413	0.336461	0.683542	-2.88971	3e-07	1.67e-06
CBO1644	CAL83179	3.7.02	Nucleotide biosynthesis	Pyrimidine ribonucleotide biosynthesis	ferredoxin-NADP reductase	pyrK1, CBO1644	-0.0859187	0.501073	0.806912	-0.34731	0.0121723	0.0273533
CBO1645	CAL83180	3.1.07	Amino acid biosynthesis	Glutamate	oxidoreductase	gltD, aspB, CBO1645	0.128713	0.446353	0.773087	-0.544828	0.0015383	0.00418755
CBO1646	CAL83181	6.5.0	Regulation	Others	signal-transduction and transcriptional-control protein (pseudogene)	CBO1646	-0.11075	0.519981	0.817822	-1.15075	1.74e-06	8.27e-06
CBO1647	CAL83182	0.0.02	Unknown function	Conserved in other than E.coli	pentapeptide repeat-containing protein	CBO1647	-0.11023	0.565765	0.842702	-0.279803	0.15437	0.250704
CBO1648	CAL83183	0.0.0	Unknown function	Unknown function, no known homologues	hypothetical protein	CBO1648	-0.0749273	0.562816	0.841603	0.0280631	0.827757	0.887293
CBO1649	CAL83184	5.1.02	Laterally acquired elements	Phage-related functions and prophages	phage surface protein	CBO1649	-0.0444115	0.818045	0.948849	-2.13825	9.83e-09	7.79e-08
CBO1650	CAL83185	5.1.02	Laterally acquired elements	Phage-related functions and prophages	hypothetical protein	CBO1650	0.0244059	0.857347	0.961769	0.0342983	0.800652	0.868298
CBO1651	CAL83186	5.1.02	Laterally acquired elements	Phage-related functions and prophages	putative phage envelope protein (partial)	CBO1651	0.104226	0.494376	0.803689	-0.0676119	0.639534	0.745562
CBO1652	CAL83187	0.0.02	Unknown function	Conserved in other than E.coli	hypothetical protein	CBO1652	0.0632764	0.583254	0.851454	-0.127022	0.441121	0.569009
CBO1653	CAL83188	5.1.02	Laterally acquired elements	Phage-related functions and prophages	phage-related protein (partial)	CBO1653	0.315362	0.0729722	0.296581	-0.197225	0.24973	0.369603
CBO1654	CAL83189	5.1.02	Laterally acquired elements	Phage-related functions and prophages	hypothetical protein	CBO1654	0.136763	0.413237	0.747398	0.604326	0.00115935	0.00324293
CBO1655	CAL83190	5.1.02	Laterally acquired elements	Phage-related functions and prophages	hypothetical protein	CBO1655	-0.113397	0.549186	0.834483	0.457716	0.0236301	0.0495604
CBO1656	CAL83191	4.1.06	Cell envelope	G+ membrane	hypothetical protein	CBO1656	0.0292806	0.866843	0.964986	0.697479	3.2e-05	0.000118912
CBO1657	CAL83192	6.5.0	Regulation	Others	signal-transduction and transcriptional-control protein (pseudogene)	CBO1657	0.301219	0.0895331	0.336755	0.554158	0.000437435	0.00132971
CBO1658	CAL83193	0.0.02	Unknown function	Conserved in other than E.coli	hypothetical protein	CBO1658	0.200744	0.135416	0.428807	0.12718	0.353884	0.484393
CBO1659	CAL83194	0.0.02	Unknown function	Conserved in other than E.coli	hypothetical protein	CBO1659	0.180248	0.389009	0.727319	-0.0759933	0.714222	0.804964
CBO1660	CAL83195	4.1.09	Cell envelope	G+ peptidoglycan, teichoic acid	alanine racemase	alr, dal, CBO1660	-0.0258512	0.832087	0.952455	-0.254267	0.0584622	0.109971
CBO1661	CAL83196	1.1.01	Cell processes	Chemotaxis and mobility	methyl-accepting chemotaxis protein	CBO1661	-0.72815	8.81954e-06	0.000297202	-1.58566	6.29e-11	1.01e-09
CBO1662	CAL83197	1.5.05	Transport/binding proteins	Other	xanthine/uracil permease	CBO1662	-0.11638	0.504454	0.808741	-0.751681	0.00310826	0.0079394
CBO1663	CAL83198	4.1.06	Cell envelope	G+ membrane	hypothetical protein	CBO1663	0.667671	0.00160464	0.0181802	0.725086	0.00136052	0.00374245
CBO1664	CAL83199	7.0.0	Not classified	Not classified (included putative assignments)	oxidoreductase, short chain dehydrogenase/reductase	CBO1664	-0.125837	0.412593	0.746834	0.0617523	0.682545	0.780441
CBO1665	CAL83200	4.1.06	Cell envelope	G+ membrane	hypothetical protein	CBO1665	-0.0347823	0.753762	0.925341	-0.095553	0.423331	0.552309
CBO1666	CAL83201	1.1.01	Cell processes	Chemotaxis and mobility	methyl-accepting chemotaxis protein	CBO1666	0.252042	0.124227	0.408559	-0.232741	0.287729	0.41246
CBO1667	CAL83202	0.0.02	Unknown function	Conserved in other than E.coli	hypothetical protein	CBO1667	-0.0459415	0.85429	0.960596	0.298961	0.0423381	0.0830249
CBO1668	CAL83203	0.0.02	Unknown function	Conserved in other than E.coli	hypothetical protein	CBO1668	-0.396382	0.0207932	0.125517	-0.363587	0.0147968	0.0326039
CBO1669	CAL83204	0.0.0	Unknown function	Unknown function, no known homologues	hypothetical protein	CBO1669	-0.0935141	0.524576	0.819848	-0.0870071	0.543769	0.663974
CBO1670	CAL83205	2.2.03	Macromolecule synthesis, modification	DNA - replication, repair, restriction/modification	helicase, SNF2/RAD54 family	CBO1670	0.155873	0.504439	0.808741	-0.0696135	0.764512	0.842051
CBO1671	CAL83206	0.0.02	Unknown function	Conserved in other than E.coli	hypothetical protein	CBO1671	-0.262569	0.226882	0.566108	0.323905	0.106394	0.183881
CBO1672	CAL83207	0.0.0	Unknown function	Unknown function, no known homologues	hypothetical protein	CBO1672	0.259271	0.119349	0.399616	0.11491	0.666274	0.7673
CBO1673	CAL83208	0.0.0	Unknown function	Unknown function, no known homologues	hypothetical protein	CBO1673	0.0486627	0.68114	0.895777	-0.123313	0.303613	0.430491
CBO1674	CAL83209	7.0.0	Not classified	Not classified (included putative assignments)	dehydrogenase	CBO1674	-0.453025	0.0153964	0.100121	-0.408947	0.0077763	0.0181863
CBO1675	CAL83210	1.5.05	Transport/binding proteins	Other	oligopeptide-binding protein	CBO1675	-0.0212823	0.876085	0.968034	-0.535959	0.00167093	0.0045186
CBO1676	CAL83211	1.5.05	Transport/binding proteins	Other	oligopeptide transport system permease	CBO1676	-0.0185342	0.877185	0.968516	-0.187191	0.160753	0.258985
CBO1677	CAL83212	1.5.05	Transport/binding proteins	Other	oligopeptide transport system, permease	CBO1677	0.0708765	0.613754	0.86556	-0.428029	0.131505	0.219157
CBO1678	CAL83213	1.5.05	Transport/binding proteins	Other	oligopeptide transport system, ATP-binding protein	CBO1678	-0.0926739	0.447781	0.774451	-0.174827	0.198398	0.307848
CBO1679	CAL83214	5.1.02	Laterally acquired elements	Phage-related functions and prophages	phage integrase	CBO1679	-0.127243	0.537912	0.827156	0.292296	0.126201	0.212001
CBO1679A	CAL83215	5.1.02	Laterally acquired elements	Phage-related functions and prophages	phage regulatory protein	CBO1679A	0.342963	0.0961385	0.351436	0.68468	0.0024368	0.00636585
CBO1680	CAL83216	5.1.02	Laterally acquired elements	Phage-related functions and prophages	phage transcriptional regulator	CBO1680	0.522745	0.00121422	0.0146907	1.42236	3.26e-09	2.94e-08
CBO1681	CAL83217	5.1.02	Laterally acquired elements	Phage-related functions and prophages	hypothetical protein	CBO1681	-0.0913086	0.528243	0.822396	-0.10634	0.464016	0.59156
CBO1682	CAL83218	5.1.02	Laterally acquired elements	Phage-related functions and prophages	phage repressor protein	CBO1682	-0.437771	0.0253731	0.144672	0.266951	0.0951614	0.167662
CBO1683	CAL83219	5.1.02	Laterally acquired elements	Phage-related functions and prophages	antirepressor	CBO1683	-0.282458	0.0333296	0.174371	-0.261686	0.155129	0.251703
CBO1684	CAL83220	5.1.02	Laterally acquired elements	Phage-related functions and prophages	phage protein	CBO1684	-0.201599	0.192358	0.518612	-0.174232	0.436319	0.564852
CBO1685	CAL83221	5.1.02	Laterally acquired elements	Phage-related functions and prophages	phage protein	CBO1685	-0.114834	0.495981	0.804342	-0.280029	0.075054	0.136594
CBO1686	CAL83222	5.1.02	Laterally acquired elements	Phage-related functions and prophages	phage protein	CBO1686	-0.0732717	0.546307	0.832824	0.163685	0.305584	0.432423
CBO1687	CAL83223	5.1.02	Laterally acquired elements	Phage-related functions and prophages	phage protein	CBO1687	-0.357547	0.0328509	0.172731	-0.539883	0.0149458	0.0329092
CBO1688	CAL83224	5.1.02	Laterally acquired elements	Phage-related functions and prophages	phage protein	CBO1688	-0.570877	0.0130338	0.0887168	-0.394825	0.0283342	0.0582412
CBO1689	CAL83225	5.1.02	Laterally acquired elements	Phage-related functions and prophages	phage protein	CBO1689	-0.493369	0.00740557	0.0582125	-0.52143	0.0113931	0.0257606
CBO1690	CAL83226	5.1.02	Laterally acquired elements	Phage-related functions and prophages	phage protein	CBO1690	-0.326386	0.113255	0.388405	-0.440825	0.0153985	0.0338398
CBO1691	CAL83227	5.1.02	Laterally acquired elements	Phage-related functions and prophages	essential recombination function protein	erF, CBO1691	-0.437722	0.0274916	0.152069	-0.368779	0.058616	0.110221
CBO1692	CAL83228	5.1.02	Laterally acquired elements	Phage-related functions and prophages	phage protein	CBO1692	-0.403022	0.0218516	0.130077	-0.605701	0.00135146	0.00372123
CBO1693	CAL83229	5.1.02	Laterally acquired elements	Phage-related functions and prophages	phage protein	CBO1693	-0.297365	0.158792	0.467348	-0.39026	0.0388496	0.0768736
CBO1694	CAL83230	5.1.02	Laterally acquired elements	Phage-related functions and prophages	phage protein	CBO1694	-0.193461	0.242434	0.586049	0.442699	0.012478	0.0279604
CBO1695	CAL83231	5.1.02	Laterally acquired elements	Phage-related functions and prophages	phage protein	CBO1695	-0.123205	0.518883	0.817115	0.095079	0.718475	0.808079
CBO1696	CAL83232	5.1.02	Laterally acquired elements	Phage-related functions and prophages	phage protein	CBO1696	-0.162054	0.363816	0.709288	0.411548	0.0142699	0.0315446
CBO1697	CAL83233	5.1.02	Laterally acquired elements	Phage-related functions and prophages	phage protein	CBO1697	-0.174423	0.285217	0.634171	-0.315692	0.0611995	0.114341
CBO1698	CAL83234	5.1.02	Laterally acquired elements	Phage-related functions and prophages	DNA N-6-adenine-methyltransferase of bacteriophage	CBO1698	-0.0732907	0.737197	0.91964	-0.222195	0.204323	0.315517
CBO1699	CAL83235	5.1.02	Laterally acquired elements	Phage-related functions and prophages	phage protein	CBO1699	-0.275047	0.149329	0.452269	0.155547	0.437328	0.56588
CBO1700	CAL83236	5.1.02	Laterally acquired elements	Phage-related functions and prophages	phage protein	CBO1700	-0.15807	0.381746	0.722078	-0.442452	0.0688994	0.1268
CBO1701	CAL83237	5.1.02	Laterally acquired elements	Phage-related functions and prophages	phage protein	CBO1701	-0.230285	0.327791	0.677228	-0.185329	0.42888	0.557613
CBO1702	CAL83238	5.1.02	Laterally acquired elements	Phage-related functions and prophages	phage protein	CBO1702	-0.376623	0.136945	0.431205	-0.43944	0.0296078	0.0604958
CBO1703	CAL83239	5.1.02	Laterally acquired elements	Phage-related functions and prophages	phage protein	CBO1703	-0.27021	0.0807067	0.316471	-0.169507	0.382414	0.513223
CBO1704	CAL83240	5.1.02	Laterally acquired elements	Phage-related functions and prophages	phage protein	CBO1704	-0.330085	0.0860372	0.328872	0.551863	0.00123095	0.00342312
CBO1705	CAL83241	5.1.02	Laterally acquired elements	Phage-related functions and prophages	phage protein	CBO1705	-0.251425	0.172188	0.488766	0.173991	0.394039	0.524308
CBO1706	CAL83242	5.1.02	Laterally acquired elements	Phage-related functions and prophages	phage protein	CBO1706	-0.199246	0.3179	0.667306	-0.507292	0.0187061	0.0402706
CBO1707	CAL83243	5.1.02	Laterally acquired elements	Phage-related functions and prophages	phage protein	CBO1707	-0.269706	0.182358	0.504442	-0.126709	0.475087	0.601581
CBO1708	CAL83244	5.1.02	Laterally acquired elements	Phage-related functions and prophages	phage protein	CBO1708	-0.244133	0.0828222	0.3219	-0.225729	0.147426	0.241119
CBO1709	CAL83245	5.1.02	Laterally acquired elements	Phage-related functions and prophages	phage protein	CBO1709	-0.258835	0.0773218	0.308054	0.263301	0.140721	0.231865
CBO1710	CAL83246	5.1.02	Laterally acquired elements	Phage-related functions and prophages	phage protein	CBO1710	-0.190918	0.364659	0.709647	0.334296	0.0975653	0.17115
CBO1711	CAL83247	5.1.02	Laterally acquired elements	Phage-related functions and prophages	phage protein	CBO1711	-0.114863	0.357333	0.703183	0.403965	0.00963529	0.0221036
CBO1712	CAL83248	5.1.02	Laterally acquired elements	Phage-related functions and prophages	phage protein	CBO1712	-0.180857	0.278986	0.628152	-0.177571	0.287543	0.412269
CBO1712A	CAL83249	5.1.02	Laterally acquired elements	Phage-related functions and prophages	phage protein	CBO1712A	-0.160687	0.348222	0.694546	0.293197	0.122601	0.20697
CBO1713	CAL83250	5.1.02	Laterally acquired elements	Phage-related functions and prophages	phage protein	CBO1713	-0.124075	0.442041	0.77028	0.130659	0.418603	0.54805
CBO1714	CAL83251	5.1.02	Laterally acquired elements	Phage-related functions and prophages	phage protein	CBO1714	-0.207606	0.252982	0.597326	-0.397503	0.0360101	0.0719334
CBO1715	CAL83252	5.1.02	Laterally acquired elements	Phage-related functions and prophages	phage protein	CBO1715	-0.2355	0.180334	0.501298	-0.395646	0.0187337	0.0403066
CBO1716	CAL83253	5.1.02	Laterally acquired elements	Phage-related functions and prophages	phage protein	CBO1716	-0.243325	0.186783	0.510649	-0.315305	0.0720645	0.131839
CBO1717	CAL83254	5.1.02	Laterally acquired elements	Phage-related functions and prophages	phage protein	CBO1717	-0.14796	0.504233	0.808715	-0.331974	0.106365	0.18388
CBO1718	CAL83255	5.1.02	Laterally acquired elements	Phage-related functions and prophages	phage protein	CBO1718	-0.194876	0.289252	0.637873	1.11772	4.79e-06	2.08e-05
CBO1719	CAL83256	5.1.02	Laterally acquired elements	Phage-related functions and prophages	phage protein	CBO1719	0.0518592	0.747861	0.923138	0.887139	0.000377788	0.00116436
CBO1720	CAL83257	5.1.02	Laterally acquired elements	Phage-related functions and prophages	phage protein	CBO1720	-1.21625	3.21438e-08	4.04678e-06	-1.18397	4.66e-08	3.11e-07
CBO1721	CAL83258	5.1.02	Laterally acquired elements	Phage-related functions and prophages	terminase small subunit	CBO1721	-1.23967	0.000102824	0.00214324	-0.720677	0.000115291	0.00039043
CBO1722	CAL83259	5.1.02	Laterally acquired elements	Phage-related functions and prophages	terminase large subunit	CBO1722	-0.0883836	0.624667	0.870947	-0.397034	0.270689	0.393336
CBO1723	CAL83260	5.1.02	Laterally acquired elements	Phage-related functions and prophages	portal protein	CBO1723	-0.121994	0.505804	0.809161	0.632966	0.00210167	0.0055624
CBO1724	CAL83261	5.1.02	Laterally acquired elements	Phage-related functions and prophages	prophage head protein	CBO1724	-0.149805	0.529445	0.822695	-0.108842	0.646915	0.751772
CBO1725	CAL83262	5.1.02	Laterally acquired elements	Phage-related functions and prophages	phage protein	CBO1725	-0.109267	0.608033	0.86435	0.334922	0.12336	0.208049
CBO1726	CAL83263	5.1.02	Laterally acquired elements	Phage-related functions and prophages	phage protein	CBO1726	-0.0109604	0.95829	0.990522	1.11123	1.48e-06	7.17e-06
CBO1727	CAL83264	5.1.02	Laterally acquired elements	Phage-related functions and prophages	scaffold protein	CBO1727	-0.00333454	0.992632	0.998214	-0.18365	0.391253	0.522147
CBO1728	CAL83265	5.1.02	Laterally acquired elements	Phage-related functions and prophages	coat protein	CBO1728	-0.340724	0.352058	0.697862	-1.09367	0.00644297	0.0153417
CBO1729	CAL83266	5.1.02	Laterally acquired elements	Phage-related functions and prophages	phage protein	CBO1729	-0.116284	0.654452	0.883902	1.83146	3.71e-07	2.03e-06
CBO1730	CAL83267	5.1.02	Laterally acquired elements	Phage-related functions and prophages	phage protein	CBO1730	-0.273948	0.380235	0.72137	0.324644	0.300408	0.427382
CBO1731	CAL83268	5.1.02	Laterally acquired elements	Phage-related functions and prophages	phage protein	CBO1731	-0.28624	0.225775	0.56451	-0.663436	0.0371757	0.0740176
CBO1732	CAL83269	5.1.02	Laterally acquired elements	Phage-related functions and prophages	phage protein	CBO1732	-0.212994	0.439036	0.767679	1.06128	0.000891058	0.00255142
CBO1733	CAL83270	5.1.02	Laterally acquired elements	Phage-related functions and prophages	phage protein	CBO1733	-0.499512	0.0863895	0.329659	-0.481418	0.0753188	0.136981
CBO1734	CAL83271	5.1.02	Laterally acquired elements	Phage-related functions and prophages	phage protein	CBO1734	-0.458943	0.0833711	0.322917	0.43848	0.035549	0.0711478
CBO1735	CAL83272	5.1.02	Laterally acquired elements	Phage-related functions and prophages	phage protein	CBO1735	-0.343544	0.0941902	0.347299	-0.910022	0.00320446	0.00816129
CBO1736	CAL83273	5.1.02	Laterally acquired elements	Phage-related functions and prophages	phage lipoprotein	CBO1736	-0.466914	0.0615316	0.263704	-0.976505	4.14e-05	0.000151318
CBO1737	CAL83274	5.1.02	Laterally acquired elements	Phage-related functions and prophages	phage protein	CBO1737	-0.114299	0.764516	0.928929	-0.3631	0.346519	0.476718
CBO1738	CAL83275	5.1.02	Laterally acquired elements	Phage-related functions and prophages	phage protein	CBO1738	-0.0550101	0.803624	0.944412	-0.393361	0.0873371	0.155672
CBO1739	CAL83276	5.1.02	Laterally acquired elements	Phage-related functions and prophages	phage protein	CBO1739	-0.188921	0.197359	0.5257	-0.32689	0.0760693	0.138074
CBO1740	CAL83277	5.1.02	Laterally acquired elements	Phage-related functions and prophages	phage protein	CBO1740	-0.235001	0.3386	0.684991	0.358922	0.114677	0.195586
CBO1741	CAL83278	5.1.02	Laterally acquired elements	Phage-related functions and prophages	phage protein	CBO1741	-0.144863	0.506414	0.809162	-0.060208	0.743001	0.825916
CBO1742	CAL83279	5.1.02	Laterally acquired elements	Phage-related functions and prophages	phage tail protein	CBO1742	-0.0793245	0.652799	0.883544	0.773619	0.0068505	0.0162286
CBO1743	CAL83280	5.1.02	Laterally acquired elements	Phage-related functions and prophages	phage protein	CBO1743	-0.246932	0.221511	0.559537	-0.318318	0.0850414	0.152079
CBO1744	CAL83281	5.1.02	Laterally acquired elements	Phage-related functions and prophages	phage tail fiber protein	CBO1744	-0.0718602	0.699287	0.903282	0.59993	0.00376242	0.00942523
CBO1745	CAL83282	5.1.02	Laterally acquired elements	Phage-related functions and prophages	phage protein	CBO1745	-0.215304	0.169425	0.483372	-0.400896	0.0857274	0.153132
CBO1746	CAL83283	5.1.02	Laterally acquired elements	Phage-related functions and prophages	phage protein	CBO1746	-0.102333	0.566027	0.842722	-0.325609	0.0757519	0.137651
CBO1747	CAL83284	5.1.02	Laterally acquired elements	Phage-related functions and prophages	phage protein	CBO1747	1.22183	4.70144e-07	3.16182e-05	1.81693	1e-09	1.07e-08
CBO1748	CAL83285	5.1.02	Laterally acquired elements	Phage-related functions and prophages	phage protein	CBO1748	-0.0483436	0.765803	0.929311	0.809345	7.11e-05	0.000249287
CBO1749	CAL83286	5.1.02	Laterally acquired elements	Phage-related functions and prophages	phage protein	CBO1749	-0.190838	0.276828	0.626109	-0.506658	0.00785582	0.0183532
CBO1750	CAL83287	5.1.02	Laterally acquired elements	Phage-related functions and prophages	phage exported protein	CBO1750	0.27708	0.330788	0.679407	0.331803	0.11595	0.197351
CBO1751	CAL83288	5.1.02	Laterally acquired elements	Phage-related functions and prophages	bacteriophage endolysin (N-acetylmuramoyl-L-alanine amidase)	CBO1751	-0.108146	0.527928	0.822396	-0.373442	0.033011	0.066636
CBO1752	CAL83289	5.1.02	Laterally acquired elements	Phage-related functions and prophages	phage protein	CBO1752	0.184305	0.314784	0.663865	0.838435	0.000443669	0.00134717
CBO1753	CAL83290	5.1.02	Laterally acquired elements	Phage-related functions and prophages	major spike protein (partial)	CBO1753	-0.103966	0.328756	0.677635	-0.139079	0.329452	0.459097
CBO1753A	CAL83291	5.1.02	Laterally acquired elements	Phage-related functions and prophages	phage protein	CBO1753A	-0.146974	0.644104	0.879503	0.326418	0.310273	0.437639
CBO1753B	CAL83292	5.1.02	Laterally acquired elements	Phage-related functions and prophages	phage protein	CBO1753B	-0.275748	0.0946404	0.348224	0.20234	0.162147	0.260777
CBO1754	CAL83293	5.1.02	Laterally acquired elements	Phage-related functions and prophages	phage protein	CBO1754	-0.286004	0.12907	0.417423	-0.302061	0.0605054	0.113224
CBO1755	CAL83294	5.1.02	Laterally acquired elements	Phage-related functions and prophages	phage protein	CBO1755	-0.229018	0.264424	0.612358	-0.309855	0.0989546	0.173239
CBO1756	CAL83295	1.5.05	Transport/binding proteins	Other	oligopeptide ABC transporterATP-binding protein	CBO1756	0.0725514	0.601178	0.860326	-0.34537	0.0204423	0.0435791
CBO1757	CAL83296	2.2.03	Macromolecule synthesis, modification	DNA - replication, repair, restriction/modification	DNA polymerase III subunit epsilon	CBO1757	-0.238296	0.207989	0.539315	-0.498841	0.00174693	0.0047042
CBO1758	CAL83297	4.1.07	Cell envelope	G+ exported/lipoprotein	hypothetical protein	CBO1758	1.27403	1.33774e-06	6.92501e-05	1.9104	1.09e-10	1.6e-09
CBO1759	CAL83298	7.0.0	Not classified	Not classified (included putative assignments)	UbiE/COQ5 family methyltransferase	CBO1759	0.484667	0.0211826	0.12733	0.708471	2.47e-05	9.36e-05
CBO1760	CAL83299	1.6.01	Adaptation	Adaptations, atypical conditions	heat shock protein	CBO1760	-0.325076	0.0340883	0.17704	-0.0852875	0.556021	0.675006
CBO1761	CAL83300	1.5.0	Transport/binding proteins	Transport/binding proteins	major facilitator transporter	CBO1761	-0.216899	0.167549	0.480912	-0.12104	0.378674	0.50955
CBO1762	CAL83301	6.3.08	Regulation	TetR	TetR family transcriptional regulator	CBO1762	-0.242553	0.132523	0.423389	-0.125931	0.424527	0.553304
CBO1763	CAL83302	3.5.05	Energy metabolism, carbon	Glycolysis	fructose-1-phosphate kinase	fruK, fpk, CBO1763	-0.23893	0.192145	0.518305	0.349491	0.0257278	0.0535553
CBO1764	CAL83303	1.5.0	Transport/binding proteins	Transport/binding proteins	amino acid/peptide transporter	CBO1764	-0.187279	0.145036	0.444803	-0.520783	0.0511202	0.0977368
CBO1765	CAL83304	0.0.0	Unknown function	Unknown function, no known homologues	hypothetical protein	CBO1765	0.0703052	0.615071	0.865999	0.171676	0.298615	0.425199
CBO1766	CAL83305	0.0.02	Unknown function	Conserved in other than E.coli	hypothetical protein	CBO1766	0.265398	0.162368	0.47292	0.192181	0.30568	0.43252
CBO1767	CAL83306	0.0.02	Unknown function	Conserved in other than E.coli	hypothetical protein	CBO1767	-0.0586817	0.655179	0.884027	-0.144444	0.165665	0.265512
CBO1768	CAL83307	0.0.02	Unknown function	Conserved in other than E.coli	hypothetical protein	CBO1768	-0.25958	0.130118	0.419551	-1.06343	2.68e-05	0.00010111
CBO1769	CAL83308	3.4.03	Degradation of small molecules	Carbon compounds	kinase, PfkB family	CBO1769	-0.515692	0.00660312	0.0532616	-1.21664	8.53e-07	4.35e-06
CBO1770	CAL83309	4.1.07	Cell envelope	G+ exported/lipoprotein	spore coat assembly protein SafA	CBO1770	0.0432831	0.709343	0.907556	0.101004	0.412264	0.541598
CBO1771	CAL83310	0.0.02	Unknown function	Conserved in other than E.coli	hypothetical protein	CBO1771	0.0475946	0.727335	0.915773	0.246496	0.0234264	0.0491811
CBO1772	CAL83311	1.6.01	Adaptation	Adaptations, atypical conditions	cold shock protein	cspC, CBO1772	0.0288408	0.807588	0.945383	0.0766667	0.589628	0.70457
CBO1773	CAL83312	1.1.01	Cell processes	Chemotaxis and mobility	methyl-accepting chemotaxis protein	CBO1773	0.329459	0.0959286	0.351018	-0.874399	0.000177181	0.00058126
CBO1774	CAL83313	1.5.0	Transport/binding proteins	Transport/binding proteins	drug resistance ABC transporter ATP-binding protein	CBO1774	-0.255595	0.174431	0.492225	-1.12317	2.51e-06	1.16e-05
CBO1775	CAL83314	7.0.0	Not classified	Not classified (included putative assignments)	prolyl-tRNA synthetase	CBO1775	-0.275883	0.1007	0.361146	1.20903	1.6e-06	7.69e-06
CBO1776	CAL83315	3.3.19	Central intermediary metabolism	Sulfur metabolism	sulfite/nitrite reductase	asrC, CBO1776	-0.413268	0.0254338	0.144861	1.34206	3.95e-08	2.68e-07
CBO1777	CAL83316	1.1.01	Cell processes	Chemotaxis and mobility	chemotaxis protein CheV	cheV, CBO1777	-0.27908	0.125079	0.41028	-0.445632	0.0190949	0.0409618
CBO1778	CAL83317	2.2.11	Macromolecule synthesis, modification	RNA synthesis, modification, DNA transcription	ATP-dependent RNA helicase, DEAD/DEAH box family	rhlE, CBO1778	-0.37618	0.0640431	0.271145	-0.680557	0.00013984	0.000466539
CBO1779	CAL83318	2.2.11	Macromolecule synthesis, modification	RNA synthesis, modification, DNA transcription	RNA-binding protein	CBO1779	0.283336	0.0933621	0.344973	0.921765	1.58e-05	6.2e-05
CBO1780	CAL83319	2.2.11	Macromolecule synthesis, modification	RNA synthesis, modification, DNA transcription	ATP-dependent RNA helicase DeaD	deaD, csdA, mssB, CBO1780	0.773829	7.41823e-06	0.000256977	0.54601	0.000170731	0.000561857
CBO1781	CAL83320	4.1.07	Cell envelope	G+ exported/lipoprotein	hypothetical protein	CBO1781	0.215089	0.136884	0.431174	-0.352305	0.0198466	0.042401
CBO1782	CAL83321	4.1.08	Cell envelope	G+ surface anchored	hypothetical protein	CBO1782	-0.0822108	0.561842	0.841082	-0.566884	0.00065834	0.00193253
CBO1783	CAL83322	4.1.09	Cell envelope	G+ peptidoglycan, teichoic acid	mannosyl-glycoprotein endo-beta-N-acetylglucosaminidase domain protein	CBO1783	-0.117849	0.562279	0.841306	-0.600709	0.00729471	0.0171774
CBO1784	CAL83323	1.6.03	Adaptation	Fe storage	ferritin	ftnA, CBO1784	0.601263	0.245156	0.589306	2.10436	1.61e-08	1.2e-07
CBO1785	CAL83324	0.0.0	Unknown function	Unknown function, no known homologues	hypothetical protein	CBO1785	-0.113737	0.467097	0.787826	0.111449	0.443358	0.570912
CBO1786	CAL83325	6.5.0	Regulation	Others	chemotaxis sensory transduction protein	CBO1786	-0.197498	0.129775	0.418928	0.398649	0.0304592	0.0621063
CBO1787	CAL83326	1.1.01	Cell processes	Chemotaxis and mobility	chemotaxis protein CheX	cheX, CBO1787	-0.153922	0.361101	0.706003	-0.96678	0.000256308	0.000814194
CBO1788	CAL83327	4.1.06	Cell envelope	G+ membrane	hypothetical protein	CBO1788	0.779355	0.00128856	0.0153207	4.19499	2.75e-14	1.98e-12
CBO1789	CAL83328	1.8.01	Differentiation/sporulation/Germination	Differentiation/sporulation/Germination	small, acid-soluble spore protein alpha	CBO1789	0.265352	0.0989	0.357529	-0.146803	0.253588	0.373837
CBO1790	CAL83329	1.8.01	Differentiation/sporulation/Germination	Differentiation/sporulation/Germination	small, acid-soluble spore protein beta	CBO1790	0.413493	0.0166854	0.106221	0.191829	0.121484	0.205283
CBO1791	CAL83330	0.0.02	Unknown function	Conserved in other than E.coli	conserved hypothetical protein (pseudogene)	CBO1791	-0.0473843	0.831381	0.95237	0.197288	0.380023	0.510973
CBO1792	CAL83331	0.0.0	Unknown function	Unknown function, no known homologues	hypothetical protein	CBO1792	0.117544	0.448246	0.77483	0.0819614	0.49668	0.62162
CBO1793	CAL83332	2.2.03	Macromolecule synthesis, modification	DNA - replication, repair, restriction/modification	site-specific tyrosine recombinase XerC	xerC, xprB1, CBO1793	-0.270403	0.14312	0.441623	0.963865	6.69e-05	0.000235343
CBO1794	CAL83333	0.0.02	Unknown function	Conserved in other than E.coli	hypothetical protein	CBO1794	0.239198	0.183658	0.505727	0.609582	0.00232281	0.00610352
CBO1795	CAL83334	6.5.0	Regulation	Others	LexA repressor	lexA, dinR, CBO1795	0.79939	0.000162508	0.00311391	3.53351	5.11e-14	3.31e-12
CBO1796	CAL83335	0.0.02	Unknown function	Conserved in other than E.coli	aluminum resistance protein	CBO1796	-1.2098	2.84017e-06	0.000125061	-0.883555	7.65e-05	0.000266555
CBO1797	CAL83336	6.5.0	Regulation	Others	RNA chaperone Hfq	hfQ, CBO1797	0.0985927	0.524439	0.819848	1.11464	0.000718997	0.00209535
CBO1798	CAL83337	2.2.11	Macromolecule synthesis, modification	RNA synthesis, modification, DNA transcription	tRNA delta(2)-isopentenylpyrophosphate transferase	miaA, trpX, CBO1798	0.321905	0.408164	0.743177	-0.503451	0.0496513	0.0954161
CBO1799	CAL83338	2.2.03	Macromolecule synthesis, modification	DNA - replication, repair, restriction/modification	DNA mismatch repair protein	mutL, CBO1799	-0.0933647	0.535713	0.825645	-0.750805	0.00620646	0.0148237
CBO1800	CAL83339	2.2.03	Macromolecule synthesis, modification	DNA - replication, repair, restriction/modification	DNA mismatch repair protein MutS	mutS, CBO1800	-0.148116	0.31337	0.662652	-2.33366	1.48e-10	2.05e-09
CBO1801	CAL83340	7.0.0	Not classified	Not classified (included putative assignments)	(dimethylallyl)adenosine tRNA methylthiotransferase	CBO1801	0.106607	0.611882	0.865177	-1.11769	3.29e-05	0.000122257
CBO1802	CAL83341	7.0.0	Not classified	Not classified (included putative assignments)	aminotransferase, classes I and II	CBO1802	-0.438493	0.0122777	0.0847321	0.770872	6.31e-05	0.000223238
CBO1803	CAL83342	0.0.02	Unknown function	Conserved in other than E.coli	hypothetical protein	CBO1803	-0.288769	0.0404078	0.197483	-0.963786	8.64e-06	3.56e-05
CBO1804	CAL83343	3.3.20	Central intermediary metabolism	Amino acids	aspartate aminotransferase	aspC, CBO1804	-0.60154	0.0282779	0.15511	-3.31966	4.31e-11	7.36e-10
CBO1805	CAL83344	7.0.0	Not classified	Not classified (included putative assignments)	GNAT family acetyltransferase	CBO1805	-0.0215918	0.881589	0.969705	0.141127	0.449659	0.577231
CBO1806	CAL83345	1.8.01	Differentiation/sporulation/Germination	Differentiation/sporulation/Germination	spore coat protein	cotS, CBO1806	0.248359	0.133998	0.426251	-0.577159	0.00176339	0.00474368
CBO1807	CAL83346	7.0.0	Not classified	Not classified (included putative assignments)	4-hydroxy-3-methylbut-2-enyl diphosphate reductase	CBO1807	-0.397893	0.0426591	0.20555	-1.57831	2.51e-08	1.8e-07
CBO1808	CAL83347	3.3.11	Central intermediary metabolism	Nucleotide interconversions	cytidylate kinase	cmk, CBO1808	-1.95638	3.30413e-11	3.05865e-08	-2.22912	3.42e-12	8.9e-11
CBO1809	CAL83348	3.1.05	Amino acid biosynthesis	Chorismate	chorismate mutase	aroH, CBO1809	-0.836226	4.23192e-06	0.000167385	-1.3989	2.37e-08	1.71e-07
CBO1810	CAL83349	4.1.07	Cell envelope	G+ exported/lipoprotein	pyridine nucleotide-disulfide oxidoreductase	CBO1810	0.023661	0.823978	0.950716	-1.46207	1.11e-10	1.62e-09
CBO1811	CAL83350	3.4.02	Degradation of small molecules	Amino acids	glutamate dehydrogenase	gluD, CBO1811	-0.252243	0.219767	0.557281	-1.96213	7.33e-10	8.18e-09
CBO1812	CAL83351	6.5.0	Regulation	Others	transcriptional regulator	CBO1812	0.350551	0.111529	0.385033	1.26136	3.51e-06	1.57e-05
CBO1813	CAL83352	2.2.11	Macromolecule synthesis, modification	RNA synthesis, modification, DNA transcription	ribosomal large subunit pseudouridine synthase B	rluB, CBO1813	-0.236157	0.168296	0.481725	-0.722728	8.17e-05	0.000283307
CBO1814	CAL83353	0.0.02	Unknown function	Conserved in other than E.coli	hypothetical protein	CBO1814	0.247901	0.175221	0.493373	1.0384	1.14e-05	4.61e-05
CBO1815	CAL83354	0.0.02	Unknown function	Conserved in other than E.coli	hypothetical protein	CBO1815	-0.360847	0.148238	0.450177	-0.172835	0.254811	0.375288
CBO1816	CAL83355	7.0.0	Not classified	Not classified (included putative assignments)	glycosyltransferase	CBO1816	0.110926	0.566785	0.843022	-1.10074	8.51e-08	5.35e-07
CBO1817	CAL83356	0.0.0	Unknown function	Unknown function, no known homologues	hypothetical protein	CBO1817	-0.117593	0.499539	0.806233	0.126493	0.442466	0.570295
CBO1818	CAL83357	1.1.01	Cell processes	Chemotaxis and mobility	methyl-accepting chemotaxis protein	CBO1818	0.116671	0.641044	0.877838	-1.65745	2.04e-06	9.61e-06
CBO1819	CAL83358	3.2.06	Biosynthesis of cofactors, carriers	Heme, porphyrin	cytochrome c-type biogenesis protein	ccdA2, CBO1819	0.218771	0.132855	0.424086	1.38816	5.96e-09	5.02e-08
CBO1820	CAL83359	3.2.15	Biosynthesis of cofactors, carriers	Thioredoxin, glutaredoxin, glutathione	thioredoxin family protein	CBO1820	0.207675	0.477885	0.795207	-1.09996	0.00112853	0.00316346
CBO1821	CAL83360	7.0.0	Not classified	Not classified (included putative assignments)	hydrolase, carbon-nitrogen family	CBO1821	-0.236193	0.127638	0.414495	-1.2586	1.13e-08	8.78e-08
CBO1822	CAL83361	4.1.06	Cell envelope	G+ membrane	hypothetical protein	CBO1822	-0.16627	0.377074	0.719639	-1.30525	9.78e-07	4.92e-06
CBO1823	CAL83362	4.1.06	Cell envelope	G+ membrane	hypothetical protein	CBO1823	-0.0973238	0.507638	0.809639	0.235014	0.160541	0.258724
CBO1824	CAL83363	1.5.02	Transport/binding proteins	Cations	transporter monovalent cation:proton antiporter-2 (CPA2) family	CBO1824	0.0771614	0.55373	0.8361	0.156051	0.345045	0.475313
CBO1825	CAL83364	7.0.0	Not classified	Not classified (included putative assignments)	4-carboxymuconolactone decarboxylase	CBO1825	0.134131	0.59487	0.857447	-1.45551	1.22e-05	4.88e-05
CBO1826	CAL83365	7.0.0	Not classified	Not classified (included putative assignments)	GNAT family acetyltransferase	CBO1826	-0.332676	0.0619385	0.264871	-1.31989	2.23e-07	1.28e-06
CBO1827	CAL83366	4.1.07	Cell envelope	G+ exported/lipoprotein	lipoprotein	CBO1827	-0.675516	0.0419712	0.203293	-4.04205	6.8e-11	1.08e-09
CBO1828	CAL83367	0.0.02	Unknown function	Conserved in other than E.coli	hypothetical protein	CBO1828	-0.570452	0.00181021	0.0198656	-2.258	1.32e-11	2.73e-10
CBO1828A	CAL83368	0.0.0	Unknown function	Unknown function, no known homologues	hypothetical protein	CBO1828A	-0.217036	0.0840975	0.324612	-2.16407	5.67e-06	2.43e-05
CBO1829	CAL83369	0.0.02	Unknown function	Conserved in other than E.coli	hypothetical protein	CBO1829	-0.178822	0.114012	0.389792	0.13067	0.240855	0.359376
CBO1830	CAL83370	3.5.02	Energy metabolism, carbon	Anaerobic respiration	hydrogenase	CBO1830	0.134197	0.510909	0.811651	0.109244	0.591798	0.70638
CBO1831	CAL83371	0.0.02	Unknown function	Conserved in other than E.coli	sporulation domain protein	CBO1831	0.0683884	0.628204	0.872335	0.405852	0.00452588	0.0111339
CBO1832	CAL83372	3.5.02	Energy metabolism, carbon	Anaerobic respiration	hydrogenase	CBO1832	0.220849	0.0748549	0.301662	0.265883	0.0817132	0.146962
CBO1833	CAL83373	3.5.02	Energy metabolism, carbon	Anaerobic respiration	hydrogenase expression/formation protein HypE	hypE, CBO1833	-0.0404278	0.725312	0.91563	-0.242892	0.179606	0.283782
CBO1834	CAL83374	3.5.02	Energy metabolism, carbon	Anaerobic respiration	hydrogenase expression/formation protein HypD	hypD, CBO1834	0.125662	0.437387	0.765646	-0.337593	0.0298369	0.0609243
CBO1835	CAL83375	3.5.02	Energy metabolism, carbon	Anaerobic respiration	[NiFe] hydrogenase maturation protein HypF	hypF, hydA, CBO1835	-0.0415241	0.681268	0.895777	-0.35426	0.0280139	0.0576883
CBO1836	CAL83376	0.0.02	Unknown function	Conserved in other than E.coli	hypothetical protein	hypQ4, CBO1836	0.0269041	0.826464	0.951013	-0.267669	0.15887	0.256644
CBO1837	CAL83377	0.0.0	Unknown function	Unknown function, no known homologues	hypothetical protein	CBO1837	-0.00469914	0.971647	0.992949	0.057352	0.665238	0.766443
CBO1838	CAL83378	0.0.02	Unknown function	Conserved in other than E.coli	heme/steroid binding domain-containing protein	hypQ3, CBO1838	-0.062682	0.684036	0.897045	0.0628996	0.683004	0.780764
CBO1839	CAL83379	3.5.02	Energy metabolism, carbon	Anaerobic respiration	hydrogenase maturation protease	hupD, CBO1839	0.0784753	0.685882	0.898031	-0.168611	0.388595	0.519259
CBO1840	CAL83380	3.5.02	Energy metabolism, carbon	Anaerobic respiration	[Ni/Fe] hydrogenase, large subunit	hupL, hybC, CBO1840	-0.281129	0.335154	0.682614	0.134093	0.485495	0.61142
CBO1841	CAL83381	3.5.02	Energy metabolism, carbon	Anaerobic respiration	[Ni/Fe] hydrogenase, small subunit	hupS, hybO, CBO1841	-0.0440528	0.777173	0.934296	-0.0536803	0.73034	0.816427
CBO1842	CAL83382	4.1.03	Cell envelope	Outer membrane constituents	TraX family protein	CBO1842	0.0591923	0.722687	0.91446	-0.214988	0.206485	0.318166
CBO1843	CAL83383	4.1.06	Cell envelope	G+ membrane	hypothetical protein	CBO1843	0.0700263	0.53155	0.823369	0.182368	0.225413	0.340565
CBO1844	CAL83384	4.1.06	Cell envelope	G+ membrane	hypothetical protein	CBO1844	0.306922	0.0598081	0.258643	2.03768	3.43e-09	3.07e-08
CBO1845	CAL83385	4.1.06	Cell envelope	G+ membrane	hypothetical protein	CBO1845	0.334792	0.158186	0.466788	2.44283	6.53e-05	0.000230523
CBO1846	CAL83386	1.5.0	Transport/binding proteins	Transport/binding proteins	ABC transporter ATP-binding protein	CBO1846	-1.16913	1.64012e-06	8.16792e-05	-2.51785	8.46e-12	1.88e-10
CBO1847	CAL83387	3.5.02	Energy metabolism, carbon	Anaerobic respiration	[Fe] hydrogenase	hymC, CBO1847	-0.0942427	0.433633	0.763948	1.73772	8.26e-12	1.85e-10
CBO1848	CAL83388	3.5.02	Energy metabolism, carbon	Anaerobic respiration	[Fe] hydrogenase, electron-transfer subunit	hymB, CBO1848	-0.0780939	0.70755	0.907192	1.4107	7.42e-07	3.83e-06
CBO1849	CAL83389	3.5.02	Energy metabolism, carbon	Anaerobic respiration	Fe] hydrogenase, electron-transfer subunit	hymA, CBO1849	0.0559355	0.662698	0.887607	1.50272	3.24e-10	4.03e-09
CBO1850	CAL83390	1.5.02	Transport/binding proteins	Cations	transporter monovalent cation:proton antiporter-2 (CPA2) family	CBO1850	0.0180735	0.870422	0.966071	-0.484869	0.00536417	0.0129771
CBO1851	CAL83391	2.2.10	Macromolecule synthesis, modification	Proteins - translation and modification	ADP-ribosylglycohydrolase	CBO1851	-0.618035	0.00102409	0.0129343	0.529721	0.000727209	0.00211653
CBO1852	CAL83392	4.1.06	Cell envelope	G+ membrane	hypothetical protein	CBO1852	-0.412271	0.0433503	0.207609	-0.696813	9.17e-05	0.000316276
CBO1853	CAL83393	1.8.01	Differentiation/sporulation/Germination	Differentiation/sporulation/Germination	D-alanyl-D-alanine carboxypeptidase	dacB, CBO1853	0.0845414	0.559946	0.839385	0.357854	0.00423048	0.0104727
CBO1854	CAL83394	4.1.06	Cell envelope	G+ membrane	hypothetical protein	CBO1854	0.0559969	0.647287	0.881114	-0.142498	0.264579	0.386707
CBO1855	CAL83395	0.0.02	Unknown function	Conserved in other than E.coli	sporulation protein YtfJ	CBO1855	-0.225003	0.144531	0.444104	0.120886	0.421215	0.550508
CBO1856	CAL83396	1.7.01	Cell division	Cell division	segregation and condensation protein B	scpB, CBO1856	-0.260751	0.137248	0.431803	-1.08144	1.13e-05	4.57e-05
CBO1857	CAL83397	1.7.01	Cell division	Cell division	segregation and condensation protein A	scpA, CBO1857	-0.67967	0.000456747	0.00704689	-0.59892	0.00143425	0.00393221
CBO1858	CAL83398	0.0.0	Unknown function	Unknown function, no known homologues	hypothetical protein	CBO1858	-0.323706	0.0275154	0.152093	-0.26968	0.0809721	0.145804
CBO1859	CAL83399	1.8.01	Differentiation/sporulation/Germination	Differentiation/sporulation/Germination	D-alanyl-D-alanine carboxypeptidase	dacF, CBO1859	0.132228	0.347414	0.693638	-0.0393654	0.813228	0.87698
CBO1860	CAL83400	4.1.06	Cell envelope	G+ membrane	hypothetical protein	ecsC, prsT, CBO1860	-0.307508	0.0491788	0.227358	-0.582788	0.000803439	0.00231782
CBO1861	CAL83401	7.0.0	Not classified	Not classified (included putative assignments)	endonuclease/exonuclease/phosphatase	CBO1861	0.464146	0.0103753	0.0746916	1.20896	3.13e-09	2.85e-08
CBO1862	CAL83402	0.0.02	Unknown function	Conserved in other than E.coli	hypothetical protein	CBO1862	0.0871766	0.653354	0.883774	-1.87006	1.82e-07	1.06e-06
CBO1863	CAL83403	3.4.05	Degradation of small molecules	Other	pyrimidine-nucleoside phosphorylase	pdp, CBO1863	-0.399354	0.0427466	0.205881	-1.79684	8.11e-09	6.61e-08
CBO1864	CAL83404	3.3.17	Central intermediary metabolism	Salvage of nucleosides and nucleotides	purine nucleoside phosphorylase	punA, pnp, deoD, CBO1864	-1.40578	1.80508e-07	1.53549e-05	-2.77627	2.56e-12	7.13e-11
CBO1865	CAL83405	2.2.03	Macromolecule synthesis, modification	DNA - replication, repair, restriction/modification	tyrosine recombinase XerD	xerD2, xprB2, CBO1865	-1.41784	0.00150794	0.017372	-1.44424	0.00128888	0.00356594
CBO1865A	CAL83406	0.0.02	Unknown function	Conserved in other than E.coli	hypothetical protein	CBO1865A	-0.0932535	0.45971	0.782551	-0.424168	0.0505502	0.0968478
CBO1866	CAL83407	1.8.01	Differentiation/sporulation/Germination	Differentiation/sporulation/Germination	sporulation protein	spoIIM, CBO1866	0.0669219	0.653518	0.883822	-0.278338	0.0552417	0.10474
CBO1867	CAL83408	3.3.17	Central intermediary metabolism	Salvage of nucleosides and nucleotides	hydrolase, NUDIX family	nudF, CBO1867	-0.542819	0.0042953	0.03845	-1.43235	1.25e-09	1.3e-08
CBO1868	CAL83409	1.5.0	Transport/binding proteins	Transport/binding proteins	amino acid ABC transporter permease	CBO1868	0.701629	0.00299833	0.0291482	1.75254	2.71e-08	1.92e-07
CBO1869	CAL83410	4.1.07	Cell envelope	G+ exported/lipoprotein	exported protein	CBO1869	0.686617	0.000558935	0.00821285	0.337324	0.00404452	0.0100647
CBO1870	CAL83411	0.0.0	Unknown function	Unknown function, no known homologues	hypothetical protein	CBO1870	0.16692	0.254512	0.598743	0.114078	0.485749	0.611637
CBO1871	CAL83412	2.2.03	Macromolecule synthesis, modification	DNA - replication, repair, restriction/modification	DNA integration/recombination protein	CBO1871	-0.042323	0.790307	0.9386	-0.340082	0.0432244	0.0845416
CBO1872	CAL83413	1.8.01	Differentiation/sporulation/Germination	Differentiation/sporulation/Germination	sporulation transcription factor Spo0A	spo0A, spo0C, spo0G, CBO1872	-0.072015	0.649896	0.882663	-0.288944	0.255497	0.376087
CBO1873	CAL83414	1.8.01	Differentiation/sporulation/Germination	Differentiation/sporulation/Germination	stage IV sporulation protein B	spoIVB, CBO1873	-0.066882	0.674704	0.891505	-0.203206	0.210613	0.322854
CBO1874	CAL83415	3.1.14	Amino acid biosynthesis	Methionine	homoserine O-succinyltransferase	metA, CBO1874	0.223118	0.0862773	0.32939	-0.149863	0.239113	0.357316
CBO1875	CAL83416	3.1.14	Amino acid biosynthesis	Methionine	homoserine dehydrogenase	hom, tdm, CBO1875	0.208992	0.219074	0.556058	0.335638	0.0179919	0.0389037
CBO1876	CAL83417	3.1.06	Amino acid biosynthesis	Cysteine	O-acetylhomoserine aminocarboxypropyltransferase/cysteine synthase	cysD, CBO1876	0.0364897	0.751392	0.92422	0.0326182	0.77697	0.850941
CBO1877	CAL83418	2.2.03	Macromolecule synthesis, modification	DNA - replication, repair, restriction/modification	DNA repair protein recN	recN, radB, CBO1877	-1.11968	4.7426e-05	0.00116982	-1.82801	1.38e-09	1.41e-08
CBO1878	CAL83419	6.5.0	Regulation	Others	arginine repressor ArgR	argR, CBO1878	-0.209507	0.150027	0.453162	-2.40116	1.04e-09	1.1e-08
CBO1879	CAL83420	7.0.0	Not classified	Not classified (included putative assignments)	ATP-NAD kinase	CBO1879	-0.192266	0.453323	0.778221	-2.36618	1.45e-08	1.1e-07
CBO1880	CAL83421	7.0.0	Not classified	Not classified (included putative assignments)	hemolysin A	CBO1880	-0.882377	0.000757058	0.010396	-2.50428	6.85e-10	7.76e-09
CBO1881	CAL83422	3.2.14	Biosynthesis of cofactors, carriers	Thiamin	1-deoxy-D-xylulose-5-phosphate synthase	dxs, CBO1881	-0.738306	0.00162864	0.0184387	-1.99098	6.56e-09	5.48e-08
CBO1882	CAL83423	4.1.06	Cell envelope	G+ membrane	hypothetical protein	CBO1882	0.188461	0.472397	0.791824	-0.593879	0.0013302	0.00367058
CBO1883	CAL83424	3.2.08	Biosynthesis of cofactors, carriers	Menaquinone, ubiquinone	geranyltranstransferase	ispA, CBO1883	-0.240433	0.110481	0.383384	-1.31941	1.28e-08	9.84e-08
CBO1884	CAL83425	2.1.01	Macromolecule degradation	Degradation of DNA	exodeoxyribonuclease VII small subunit	xseB, CBO1884	-0.103198	0.43962	0.767849	-0.668711	2.76e-05	0.000103943
CBO1885	CAL83426	2.1.01	Macromolecule degradation	Degradation of DNA	exodeoxyribonuclease VII large subunit	xseA, CBO1885	-0.215932	0.163296	0.474393	-0.558535	0.000237161	0.000759813
CBO1886	CAL83427	2.2.11	Macromolecule synthesis, modification	RNA synthesis, modification, DNA transcription	transcription antitermination protein NusB	nusB, ssyB, CBO1886	-1.06126	6.23563e-07	3.90605e-05	-1.2465	1.34e-07	8.07e-07
CBO1887	CAL83428	0.0.02	Unknown function	Conserved in other than E.coli	alkaline shock protein	CBO1887	-0.017204	0.932696	0.984168	0.299722	0.104829	0.181764
CBO1888	CAL83429	4.1.07	Cell envelope	G+ exported/lipoprotein	stage III sporulation protein AH	CBO1888	0.190438	0.234379	0.575689	0.110899	0.455708	0.583394
CBO1889	CAL83430	1.8.01	Differentiation/sporulation/Germination	Differentiation/sporulation/Germination	stage III sporulation protein AG	spoIIIAG, CBO1889	0.151665	0.332807	0.681348	0.8214	1.38e-05	5.47e-05
CBO1890	CAL83431	1.8.01	Differentiation/sporulation/Germination	Differentiation/sporulation/Germination	stage III sporulation protein AF	spoIIIAF, CBO1890	0.052335	0.647807	0.881271	0.378763	0.0276107	0.056955
CBO1891	CAL83432	1.8.01	Differentiation/sporulation/Germination	Differentiation/sporulation/Germination	stage III sporulation protein AE	spoIIIAE, CBO1891	0.170089	0.221786	0.559545	0.0617192	0.680728	0.778986
CBO1892	CAL83433	1.8.01	Differentiation/sporulation/Germination	Differentiation/sporulation/Germination	stage III sporulation protein AD	spoIIIAD, CBO1892	0.0842922	0.618034	0.867341	0.472297	0.00224566	0.00591562
CBO1893	CAL83434	1.8.01	Differentiation/sporulation/Germination	Differentiation/sporulation/Germination	stage III sporulation protein AC	spoIIIAC, CBO1893	0.2127	0.228737	0.567887	0.510582	0.00763303	0.0178805
CBO1894	CAL83435	1.8.01	Differentiation/sporulation/Germination	Differentiation/sporulation/Germination	stage III sporulation protein SpoAB	spoIIIAB, CBO1894	0.318642	0.1259	0.411992	0.229882	0.131352	0.219041
CBO1895	CAL83436	1.8.01	Differentiation/sporulation/Germination	Differentiation/sporulation/Germination	stage III sporulation protein AA	spoIIIAA, CBO1895	0.302625	0.0672427	0.280147	0.135491	0.395558	0.525396
CBO1896	CAL83437	0.0.02	Unknown function	Conserved in other than E.coli	hypothetical protein	CBO1896	-0.228241	0.370881	0.714008	-2.43516	8.06e-09	6.57e-08
CBO1897	CAL83438	2.2.10	Macromolecule synthesis, modification	Proteins - translation and modification	elongation factor P	efp, CBO1897	-0.754874	0.00360547	0.0336283	-2.47404	2.63e-12	7.31e-11
CBO1898	CAL83439	3.1.05	Amino acid biosynthesis	Chorismate	3-dehydroquinate dehydratase	aroQ, CBO1898	-0.157073	0.310439	0.659473	-3.00347	4.04e-08	2.73e-07
CBO1899	CAL83440	3.1.05	Amino acid biosynthesis	Chorismate	shikimate kinase	aroK, CBO1899	0.285427	0.488226	0.799918	-0.35562	0.0147805	0.0325771
CBO1900	CAL83441	4.1.07	Cell envelope	G+ exported/lipoprotein	hypothetical protein	CBO1900	-0.170713	0.254737	0.598865	-0.636989	0.000132916	0.000444852
CBO1901	CAL83442	4.1.06	Cell envelope	G+ membrane	hypothetical protein	CBO1901	0.0582292	0.742551	0.922404	-0.202897	0.259917	0.380919
CBO1902	CAL83443	0.0.02	Unknown function	Conserved in other than E.coli	hypothetical protein	CBO1902	0.173692	0.364711	0.709647	-0.166495	0.26514	0.387244
CBO1903	CAL83444	0.0.0	Unknown function	Unknown function, no known homologues	lipoprotein	CBO1903	0.124296	0.379217	0.720704	0.0904904	0.612301	0.723717
CBO1904	CAL83445	0.0.02	Unknown function	Conserved in other than E.coli	hypothetical protein	CBO1904	0.101113	0.528085	0.822396	-0.155209	0.33627	0.466245
CBO1905	CAL83446	4.1.07	Cell envelope	G+ exported/lipoprotein	hypothetical protein	CBO1905	-0.182708	0.220661	0.558126	-0.207075	0.129231	0.216214
CBO1906	CAL83447	4.1.07	Cell envelope	G+ exported/lipoprotein	hypothetical protein	CBO1906	0.0600677	0.675025	0.891554	0.195573	0.181745	0.286499
CBO1907	CAL83448	4.1.05	Cell envelope	Surface structures	pilin	CBO1907	0.0554611	0.764017	0.928873	0.242918	0.198064	0.30748
CBO1908	CAL83449	1.5.05	Transport/binding proteins	Other	type II secretion system protein F	CBO1908	-0.0714321	0.512432	0.812553	-0.130046	0.239161	0.357316
CBO1909	CAL83450	1.5.05	Transport/binding proteins	Other	general secretion pathway protein E	CBO1909	-0.120603	0.399916	0.738329	-0.140067	0.394945	0.524923
CBO1910	CAL83451	4.1.06	Cell envelope	G+ membrane	hypothetical protein	CBO1910	-0.125342	0.33773	0.684429	0.10645	0.478679	0.605106
CBO1911	CAL83452	4.1.07	Cell envelope	G+ exported/lipoprotein	lipoprotein	CBO1911	0.222922	0.291543	0.640516	1.03077	4.22e-07	2.29e-06
CBO1912	CAL83453	3.1.13	Amino acid biosynthesis	Lysine	diaminopimelate epimerase	dapF, CBO1912	-0.0613047	0.703314	0.905128	2.03317	9.23e-11	1.39e-09
CBO1913	CAL83454	0.0.02	Unknown function	Conserved in other than E.coli	fibronectin-binding protein	CBO1913	0.0612683	0.653054	0.883672	-0.442819	0.00429774	0.0106193
CBO1914	CAL83455	2.2.11	Macromolecule synthesis, modification	RNA synthesis, modification, DNA transcription	tRNA pseudouridine synthase A	truA1, CBO1914	0.193939	0.343611	0.689369	0.628686	0.00127751	0.00353822
CBO1915	CAL83456	0.0.0	Unknown function	Unknown function, no known homologues	hypothetical protein	CBO1915	0.215307	0.318658	0.668183	0.73092	0.00038048	0.00117175
CBO1916	CAL83457	7.0.0	Not classified	Not classified (included putative assignments)	HIT family protein	CBO1916	0.186145	0.401108	0.73887	1.33507	1.29e-08	9.89e-08
CBO1917	CAL83458	3.3.20	Central intermediary metabolism	Amino acids	glutamate decarboxylase	gadA, gadS, CBO1917	0.215727	0.18312	0.505484	0.58136	0.00145245	0.00397724
CBO1918	CAL83459	0.0.0	Unknown function	Unknown function, no known homologues	hypothetical protein	CBO1918	0.105855	0.377053	0.719639	3.36846	5.95e-13	2.22e-11
CBO1919	CAL83460	1.1.01	Cell processes	Chemotaxis and mobility	methyl-accepting chemotaxis protein	CBO1919	0.300494	0.0494929	0.228207	0.266263	0.160472	0.258639
CBO1920	CAL83461	2.1.04	Macromolecule degradation	Degradation of proteins, peptides, glycoproteins	clostripain	closI, CBO1920	-0.313994	0.0729247	0.296465	-1.70418	0.00329881	0.00837313
CBO1921	CAL83462	6.1.02	Regulation	Response regulator	exported protein	CBO1921	-0.121764	0.495138	0.997839	-0.121764	0.495138	0.997839
CBO1922	CAL83464	6.1.01	Regulation	Sensor kinase	sensor histidine kinase	CBO1922	-0.285065	0.0337914	0.176143	0.592542	0.00190393	0.00508437
CBO1923	CAL83465	2.2.10	Macromolecule synthesis, modification	Proteins - translation and modification	methionine sulfoxide reductase A	msrA, CBO1923	-0.808303	2.37135e-05	0.000666393	-0.826823	6.39e-06	2.71e-05
CBO1924	CAL83466	6.1.02	Regulation	Response regulator	response regulator	CBO1924	-0.592761	0.0054926	0.0459039	-0.94922	7.77e-05	0.000270385
CBO1925	CAL83467	6.1.01	Regulation	Sensor kinase	sensor histidine kinase	CBO1925	0.145184	0.276967	0.62615	-0.114021	0.353316	0.483784
CBO1926	CAL83468	6.1.02	Regulation	Response regulator	DNA-binding response regulator	CBO1926	0.0490917	0.724662	0.915469	0.0190025	0.892463	0.930298
CBO1927	CAL83469	4.1.06	Cell envelope	G+ membrane	hypothetical protein	CBO1927	0.0359623	0.821873	0.949762	-0.187268	0.438148	0.566521
CBO1928	CAL83470	4.1.06	Cell envelope	G+ membrane	ABC transporter permease	CBO1928	0.0228158	0.866343	0.964986	-0.191495	0.253557	0.373827
CBO1929	CAL83471	1.5.0	Transport/binding proteins	Transport/binding proteins	ABC transporter ATP-binding protein	CBO1929	0.0518148	0.69305	0.900079	-0.140216	0.251491	0.371338
CBO1930	CAL83472	1.5.0	Transport/binding proteins	Transport/binding proteins	ABC transporter ATP-binding protein/permease	CBO1930	-0.0152164	0.929045	0.983213	-0.244056	0.132129	0.220009
CBO1931	CAL83473	1.5.0	Transport/binding proteins	Transport/binding proteins	ABC transporter permease/ATP-binding protein	CBO1931	0.0305073	0.785203	0.937182	-0.703132	4.26e-06	1.87e-05
CBO1932	CAL83474	6.3.07	Regulation	MarR	MarR family transcriptional regulator	CBO1932	-0.431309	0.0030825	0.0297056	-0.265425	0.18671	0.292772
CBO1933	CAL83475	3.2.09	Biosynthesis of cofactors, carriers	Molybdopterin	molybdopterin biosynthesis protein MoeB	moeB, chlN, CBO1933	0.333307	0.0812229	0.317961	0.915047	7.14e-05	0.000250199
CBO1934	CAL83476	3.2.09	Biosynthesis of cofactors, carriers	Molybdopterin	molybdopterin converting factor subunit 1	moaD, CBO1934	0.309219	0.0611627	0.262553	1.28574	3.68e-07	2.02e-06
CBO1935	CAL83477	3.3.15	Central intermediary metabolism	Pool, multipurpose conversions of intermediate metabolism	aldehyde ferredoxin oxidoreductase	aorA, CBO1935	0.333541	0.147475	0.448558	1.26313	3.03e-06	1.38e-05
CBO1936	CAL83478	0.0.0	Unknown function	Unknown function, no known homologues	hypothetical protein	CBO1936	0.114246	0.444665	0.772155	-0.201042	0.19194	0.299758
CBO1937	CAL83479	6.5.0	Regulation	Others	aor transcriptional regulator	aorR, CBO1937	0.319658	0.111277	0.384789	1.82732	7.9e-10	8.73e-09
CBO1938	CAL83480	3.2.09	Biosynthesis of cofactors, carriers	Molybdopterin	MOSC domain-containing protein	CBO1938	-0.0678016	0.740406	0.921016	0.964763	8.13e-08	5.14e-07
CBO1939	CAL83481	3.2.09	Biosynthesis of cofactors, carriers	Molybdopterin	molybdenum cofactor biosynthesis protein MoaC	moaC, CBO1939	0.280538	0.403473	0.739728	1.55453	0.000146493	0.000486875
CBO1940	CAL83482	3.2.09	Biosynthesis of cofactors, carriers	Molybdopterin	molybdenum cofactor biosynthesis protein A	moaA, chlA, narA, bisA, CBO1940	0.0748644	0.666632	0.888658	1.52651	3.39e-08	2.34e-07
CBO1941	CAL83483	3.2.09	Biosynthesis of cofactors, carriers	Molybdopterin	LysR family transcriptional regulator	moeA2, CBO1941	0.129629	0.198504	0.527233	1.88062	1.78e-10	2.42e-09
CBO1942	CAL83484	3.2.09	Biosynthesis of cofactors, carriers	Molybdopterin	molybdopterin biosynthesis protein MoeA	moeA1, chlE, bisB, narE, CBO1942	0.100774	0.710609	0.907909	1.11832	1.83e-08	1.36e-07
CBO1943	CAL83485	3.2.09	Biosynthesis of cofactors, carriers	Molybdopterin	molybdopterin biosynthesis protein Mog	mogA, mog, chlG, CBO1943	0.0938376	0.504429	0.808741	1.59375	5.31e-10	6.19e-09
CBO1944	CAL83486	1.5.05	Transport/binding proteins	Other	tungstate ABC transporter ATP-binding protein	tupC, CBO1944	0.153894	0.208187	0.539475	0.902972	3.42e-07	1.88e-06
CBO1945	CAL83487	1.5.05	Transport/binding proteins	Other	tungstate ABC transporter permease	tupB, CBO1945	0.404949	0.0141079	0.0935199	2.10375	2.68e-09	2.49e-08
CBO1946	CAL83488	1.5.05	Transport/binding proteins	Other	tungstate ABC transporter tungstate-binding protein	tupA, CBO1946	0.907943	0.000950216	0.0121772	3.03491	1.08e-10	1.59e-09
CBO1947	CAL83489	1.5.0	Transport/binding proteins	Transport/binding proteins	drug/sodium antiporter	CBO1947	0.437128	0.00729275	0.057498	-0.528933	0.000960653	0.00273131
CBO1948	CAL83490	0.0.0	Unknown function	Unknown function, no known homologues	hypothetical protein	CBO1948	0.133507	0.402743	0.739208	-0.0472355	0.782798	0.855123
CBO1949	CAL83491	4.1.06	Cell envelope	G+ membrane	hypothetical protein	CBO1949	0.423969	0.0169928	0.107574	0.415029	0.0111661	0.0252908
CBO1950	CAL83492	1.5.0	Transport/binding proteins	Transport/binding proteins	ABC transporter ATP-binding protein	CBO1950	0.724138	0.00030277	0.00511233	0.259374	0.0629711	0.117248
CBO1951	CAL83493	1.5.0	Transport/binding proteins	Transport/binding proteins	ABC transporter permease	CBO1951	0.725399	0.000426198	0.00664725	0.631054	0.00150478	0.00410623
CBO1952	CAL83494	1.5.0	Transport/binding proteins	Transport/binding proteins	ABC transporter permease/ATP-binding protein	CBO1952	0.396469	0.252463	0.596996	0.406917	0.00345638	0.00873222
CBO1953	CAL83495	1.5.0	Transport/binding proteins	Transport/binding proteins	ABC transporter ATP-binding/permease	CBO1953	0.415472	0.00568661	0.0472743	0.27382	0.0974108	0.170898
CBO1954	CAL83496	6.3.12	Regulation	MerR	MerR family transcriptional regulator	CBO1954	-0.354198	0.034097	0.17704	-0.162847	0.306817	0.433855
CBO1955	CAL83497	7.0.0	Not classified	Not classified (included putative assignments)	NADPH-dependent FMN reductase	CBO1955	0.0260976	0.8529	0.959954	0.403551	0.0145984	0.0322164
CBO1956	CAL83498	0.0.0	Unknown function	Unknown function, no known homologues	hypothetical protein	CBO1956	0.10798	0.488567	0.80006	0.179838	0.20276	0.313565
CBO1957	CAL83499	4.1.04	Cell envelope	Surface polysaccharides & antigens	leucine-rich repeat-containing protein	CBO1957	0.0592847	0.704875	0.905259	2.75096	2.77e-09	2.56e-08
CBO1958	CAL83500	2.1.03	Macromolecule degradation	Degradation of polysaccharides	secreted carbohydrate-binding protein	CBO1958	0.728703	0.00271444	0.0270649	1.26312	8.21e-07	4.21e-06
CBO1959	CAL83501	6.5.0	Regulation	Others	sigma-54 dependent transcriptional regulator	CBO1959	0.35868	0.109591	0.381736	0.492513	0.0326493	0.0659735
CBO1960	CAL83502	0.0.02	Unknown function	Conserved in other than E.coli	hypothetical protein	CBO1960	0.0484493	0.707846	0.907192	-0.0838416	0.518233	0.640999
CBO1961	CAL83503	2.1.02	Macromolecule degradation	Degradation of RNA	endoribonuclease L-PSP	CBO1961	0.333833	0.0637962	0.270346	-0.180268	0.230704	0.346926
CBO1962	CAL83504	1.5.0	Transport/binding proteins	Transport/binding proteins	sodium:dicarboxylate symporter	CBO1962	0.108394	0.476471	0.794978	-0.087276	0.565524	0.683432
CBO1963	CAL83505	7.0.0	Not classified	Not classified (included putative assignments)	aminotransferase, classes I and II	CBO1963	0.14989	0.323707	0.67323	-0.212052	0.101335	0.17664
CBO1964	CAL83506	0.0.02	Unknown function	Conserved in other than E.coli	hypothetical protein	CBO1964	0.152176	0.324741	0.674254	-0.258049	0.188872	0.295661
CBO1965	CAL83507	4.1.04	Cell envelope	Surface polysaccharides & antigens	leucine-rich repeat-containing protein	CBO1965	0.115606	0.566997	0.843039	-0.229571	0.261665	0.38311
CBO1966	CAL83508	7.0.0	Not classified	Not classified (included putative assignments)	secreted protein	CBO1966	0.446476	0.0804553	0.315821	0.28405	0.254521	0.374932
CBO1967	CAL83509	6.1.01	Regulation	Sensor kinase	sensor histidine kinase	CBO1967	0.240552	0.132454	0.423319	-0.74461	0.00157913	0.00428831
CBO1968	CAL83510	6.1.02	Regulation	Response regulator	DNA-binding response regulator	CBO1968	0.16809	0.396209	0.735087	-0.645409	0.00137139	0.00376905
CBO1969	CAL83511	0.0.02	Unknown function	Conserved in other than E.coli	hypothetical protein	CBO1969	0.028065	0.875036	0.967619	-1.66778	1.33e-08	1.02e-07
CBO1970	CAL83512	1.5.02	Transport/binding proteins	Cations	ABC transporter permease	CBO1970	0.156767	0.478121	0.795285	-0.98055	6.61e-07	3.45e-06
CBO1971	CAL83513	1.5.02	Transport/binding proteins	Cations	ABC transporter ATP-binding protein	CBO1971	-0.15593	0.413749	0.74792	-2.7734	1.27e-10	1.82e-09
CBO1972	CAL83514	4.1.06	Cell envelope	G+ membrane	ABC transporter permease	CBO1972	-0.245765	0.285334	0.634171	-1.08276	1.61e-06	7.71e-06
CBO1973	CAL83515	4.1.09	Cell envelope	G+ peptidoglycan, teichoic acid	alanine racemase	CBO1973	-0.246246	0.0421189	0.203696	-0.489289	0.000364554	0.00112711
CBO1973A	CAL83516	1.8.01	Differentiation/sporulation/Germination	Differentiation/sporulation/Germination	spore germination protein (partial)	CBO1973A	0.118997	0.471242	0.791202	-0.0885147	0.556533	0.675211
CBO1974	CAL83517	1.8.01	Differentiation/sporulation/Germination	Differentiation/sporulation/Germination	spore germination protein	gerAB1, CBO1974	0.105897	0.510228	0.811139	0.105504	0.468616	0.595928
CBO1975	CAL83518	1.8.01	Differentiation/sporulation/Germination	Differentiation/sporulation/Germination	spore germination protein	gerAA, CBO1975	-0.0407584	0.777932	0.934484	0.0730472	0.641574	0.746896
CBO1976	CAL83519	1.8.01	Differentiation/sporulation/Germination	Differentiation/sporulation/Germination	spore germination protein	gerAB2, CBO1976	-0.116542	0.388851	0.727246	-0.126362	0.35098	0.48113
CBO1977	CAL83520	1.8.01	Differentiation/sporulation/Germination	Differentiation/sporulation/Germination	spore germination protein	gerAC, CBO1977	-0.0902488	0.603703	0.861612	0.2008	0.254089	0.374365
CBO1978	CAL83521	1.8.01	Differentiation/sporulation/Germination	Differentiation/sporulation/Germination	spore germination protein	gerAB3, CBO1978	-0.15165	0.207989	0.539315	0.169855	0.355378	0.485848
CBO1979	CAL83522	4.1.06	Cell envelope	G+ membrane	hypothetical protein	CBO1979	-0.107052	0.570284	0.844155	0.419987	0.0025041	0.00652757
CBO1980	CAL83523	4.1.06	Cell envelope	G+ membrane	hypothetical protein	CBO1980	0.11993	0.419827	0.752314	0.126494	0.347004	0.477221
CBO1981	CAL83524	7.0.0	Not classified	Not classified (included putative assignments)	4-carboxymuconolactone decarboxylase	CBO1981	-0.515325	0.0389462	0.192683	-3.26241	2.22e-12	6.41e-11
CBO1982	CAL83525	7.0.0	Not classified	Not classified (included putative assignments)	radical SAM domain protein	CBO1982	-0.133478	0.59451	0.857447	-2.81819	9.94e-09	7.87e-08
CBO1983	CAL83526	0.0.02	Unknown function	Conserved in other than E.coli	hypothetical protein	CBO1983	0.315973	0.0212739	0.127672	-1.11799	3.25e-06	1.47e-05
CBO1984	CAL83527	1.5.02	Transport/binding proteins	Cations	potassium/proton antiporter	CBO1984	-0.211359	0.417704	0.750251	0.913883	0.00200366	0.0053245
CBO1985	CAL83528	1.3.01	Cell processes	Chaperones	heat shock protein 90	htpG, CBO1985	-0.136493	0.544577	0.831879	-3.15549	4.82e-08	3.2e-07
CBO1986	CAL83529	2.2.03	Macromolecule synthesis, modification	DNA - replication, repair, restriction/modification	MutS domain-containing protein	CBO1986	0.244673	0.136444	0.430594	-0.372939	0.0285538	0.0586314
CBO1987	CAL83530	1.5.03	Transport/binding proteins	Carbohydrates, organic acids and alcohols	PTS system, trehalose-specific IIBC component	treB, CBO1987	-0.319702	0.270976	0.619275	-1.55887	1.18e-05	4.73e-05
CBO1988	CAL83531	3.4.03	Degradation of small molecules	Carbon compounds	alpha,alpha-phosphotrehalase	treA, treC, CBO1988	-0.48796	0.088514	0.3342	-1.61886	1.01e-05	4.13e-05
CBO1989	CAL83532	6.3.03	Regulation	GntR	trehalose operon repressor	treR, CBO1989	0.125719	0.623598	0.870614	-2.84775	1.1e-07	6.75e-07
CBO1990	CAL83533	1.5.03	Transport/binding proteins	Carbohydrates, organic acids and alcohols	PTS system fructose family transporter subunit IIA	CBO1990	-0.0875345	0.669089	0.88941	0.435202	0.0204161	0.043535
CBO1991	CAL83534	1.5.03	Transport/binding proteins	Carbohydrates, organic acids and alcohols	PTS system fructose family transporter subunit IIBC	CBO1991	0.0925221	0.571642	0.844717	0.910003	9.48e-05	0.000325967
CBO1992	CAL83535	3.4.03	Degradation of small molecules	Carbon compounds	kinase, pfkB family	CBO1992	0.106382	0.751241	0.92422	-0.144306	0.650136	0.754234
CBO1993	CAL83536	3.4.03	Degradation of small molecules	Carbon compounds	tagatose-bisphosphate aldolase	agaY, kba, CBO1993	-0.202246	0.389209	0.72752	0.183356	0.434209	0.562687
CBO1994	CAL83537	6.5.0	Regulation	Others	transcriptional regulator	CBO1994	-0.401936	0.00315478	0.0302172	0.645493	3.14e-05	0.000116945
CBO1995	CAL83538	0.0.02	Unknown function	Conserved in other than E.coli	hypothetical protein	CBO1995	-0.320275	0.0256471	0.14534	0.445376	0.0123653	0.0277434
CBO1996	CAL83539	2.1.02	Macromolecule degradation	Degradation of RNA	endoribonuclease L-PSP	CBO1996	0.0450522	0.726275	0.915773	1.58099	1.54e-10	2.13e-09
CBO1997	CAL83540	7.0.0	Not classified	Not classified (included putative assignments)	radical SAM domain protein	CBO1997	-0.039667	0.788578	0.937707	0.605808	0.000143894	0.000478644
CBO1998	CAL83541	0.0.0	Unknown function	Unknown function, no known homologues	hypothetical protein	CBO1998	0.0848386	0.496609	0.804626	0.174191	0.170964	0.272723
CBO1999	CAL83542	3.3.08	Central intermediary metabolism	Misc. glycerol metabolism	glycerol dehydrogenase	gldA2, CBO1999	0.548281	0.0927641	0.343732	2.39457	1.54e-09	1.55e-08
CBO2000	CAL83543	1.1.01	Cell processes	Chemotaxis and mobility	methyl-accepting chemotaxis protein	CBO2000	-0.808472	2.67991e-05	0.000732183	-1.65486	1.69e-08	1.26e-07
CBO2001	CAL83544	0.0.0	Unknown function	Unknown function, no known homologues	hypothetical protein	CBO2001	0.233126	0.156278	0.464026	0.289853	0.0771123	0.139822
CBO2002	CAL83545	4.1.09	Cell envelope	G+ peptidoglycan, teichoic acid	alanine racemase	CBO2002	0.286125	0.0653984	0.274942	1.22055	2.99e-07	1.67e-06
CBO2003	CAL83546	0.0.02	Unknown function	Conserved in other than E.coli	hypothetical protein	CBO2003	-0.0888617	0.555477	0.836752	1.73897	3.2e-07	1.77e-06
CBO2004	CAL83547	7.0.0	Not classified	Not classified (included putative assignments)	oxidoreductase	CBO2004	-0.279787	0.0481863	0.223888	1.12638	7.05e-08	4.51e-07
CBO2005	CAL83548	7.0.0	Not classified	Not classified (included putative assignments)	adenine phosphoribosyltransferase	CBO2005	-0.0995264	0.427678	0.759404	0.458265	0.00142544	0.00391008
CBO2006	CAL83549	4.1.06	Cell envelope	G+ membrane	xanthine/uracil permease	CBO2006	0.266861	0.159546	0.468866	0.623614	0.00288105	0.0074217
CBO2007	CAL83550	7.0.0	Not classified	Not classified (included putative assignments)	signaling protein	CBO2007	0.110402	0.484321	0.798838	0.90566	1.81e-06	8.59e-06
CBO2008	CAL83551	4.1.06	Cell envelope	G+ membrane	hypothetical protein	CBO2008	0.280037	0.12582	0.411821	1.43063	1.26e-07	7.65e-07
CBO2009	CAL83552	6.5.0	Regulation	Others	sigma-54 dependent transcriptional regulator	CBO2009	0.0152223	0.94899	0.988408	1.07221	1.53e-06	7.39e-06
CBO2010	CAL83553	2.2.11	Macromolecule synthesis, modification	RNA synthesis, modification, DNA transcription	ATP-dependent RNA helicase, DEAD/DEAH box family	CBO2010	0.333324	0.0497861	0.228955	1.26005	1.13e-08	8.82e-08
CBO2011	CAL83554	4.1.07	Cell envelope	G+ exported/lipoprotein	SCP-like extracellular protein	CBO2011	0.187793	0.190351	0.515256	1.29673	1.56e-08	1.17e-07
CBO2012	CAL83555	6.3.03	Regulation	GntR	GntR family transcriptional regulator	CBO2012	-0.328128	0.103555	0.367535	-0.387308	0.0106967	0.0243222
CBO2013	CAL83556	4.1.06	Cell envelope	G+ membrane	hypothetical protein	CBO2013	0.0727809	0.636343	0.876206	0.195786	0.211696	0.324167
CBO2015	CAL83557	3.3.20	Central intermediary metabolism	Amino acids	aspartate aminotransferase	CBO2015	0.00505527	0.970796	0.992814	0.755405	0.000111919	0.000379584
CBO2016	CAL83558	1.5.01	Transport/binding proteins	Amino acids and amines	polar amino acid ABC transporter ATP-binding protein	CBO2016	0.0969757	0.721504	0.914237	1.62423	1.17e-06	5.77e-06
CBO2017	CAL83559	1.5.01	Transport/binding proteins	Amino acids and amines	amino acid ABC transporter permease	CBO2017	0.109925	0.510347	0.811163	1.56697	6e-07	3.16e-06
CBO2018	CAL83560	1.5.01	Transport/binding proteins	Amino acids and amines	amino acid ABC transporter substrate-binding protein	CBO2018	0.158825	0.229819	0.569821	2.7207	4.65e-09	4.04e-08
[truncated: 1,657 more rows]

## Sheet: 2. k-means cluster 1
locus_tag	EMBL	Classnum	Main class	Sub-class	Product	Gene symbol	1h_log2	1h_p-value	1h_FDR	5h_log2	5h_p-value	5h_FDR	k-means_cluster	hcl_subcluster	hcl_subcluster	hcl_row
CBO0096	CAL81652	4.1.06	Cell envelope	G+ membrane	hypothetical protein	CBO0096	0.643971	0.00127525	0.015192	3.0546	2.62e-13	1.17e-11	1	1	1	1
CBO1310	CAL82857	7.0.0	Not classified	Not classified (included putative assignments)	dinitrogenase iron-molybdenum cofactor family protein	CBO1310	0.654576	0.0103833	0.0747153	3.00205	6.83e-11	1.08e-09	1	1	1	2
CBO2436	CAL83986	6.5.0	Regulation	Others	transcriptional repressor CodY	codY, CBO2436	0.719091	0.0383778	0.191245	2.9621	2.22e-08	1.61e-07	1	1	1	3
CBO0501	CAL82055	1.4.02	Protection responses	Detoxification	thiol peroxidase	tpx, CBO0501	0.768183	0.00165062	0.0186206	3.09065	1.92e-13	9.11e-12	1	1	1	4
CBO3576	CAL85135	2.2.10	Macromolecule synthesis, modification	Proteins - translation and modification	methionine aminopeptidase	map2, CBO3576	0.416977	0.0554874	0.24666	3.15054	1.3e-11	2.68e-10	1	1	1	5
CBO2481	CAL84030	0.0.0	Unknown function	Unknown function, no known homologues	hypothetical protein	CBO2481	0.458672	0.146206	0.446419	2.88447	7.79e-11	1.21e-09	1	1	1	6
CBO1091	CAL82644	6.3.03	Regulation	GntR	GntR family transcriptional regulator	CBO1091	0.657096	0.00123637	0.0148752	2.89337	9.23e-13	3.12e-11	1	1	1	7
CBO0962	CAL82516	1.5.02	Transport/binding proteins	Cations	molybdenum ABC transporter permease	modB, CBO0962	0.676068	0.00369365	0.0342326	2.81994	3.5e-12	9.08e-11	1	1	1	8
CBO0052A	CAL81608	0.0.02	Unknown function	Conserved in other than E.coli	hypothetical protein	CBO0052A	0.642583	0.00126513	0.0151287	2.78083	1.31e-12	4.13e-11	1	1	1	9
CBO1252	CAL82804	3.2.15	Biosynthesis of cofactors, carriers	Thioredoxin, glutaredoxin, glutathione	rubredoxin	grxC, CBO1252	0.656148	0.00965903	0.0709822	2.7351	2.83e-10	3.59e-09	1	1	1	10
CBO1074	CAL82628	0.0.02	Unknown function	Conserved in other than E.coli	hypothetical protein	CBO1074	0.776874	0.000388791	0.00616774	2.70321	6.36e-12	1.49e-10	1	1	1	11
CBO1181	CAL82731	1.5.01	Transport/binding proteins	Amino acids and amines	polar amino acid ABC transporter amino acid-binding protein	CBO1181	0.718963	0.0340238	0.177002	2.65339	2.37e-11	4.5e-10	1	1	1	12
CBO1624	CAL83159	0.0.02	Unknown function	Conserved in other than E.coli	hypothetical protein	CBO1624	0.888144	0.000131655	0.00263832	3.06438	1.15e-12	3.73e-11	1	1	1	13
CBO1946	CAL83488	1.5.05	Transport/binding proteins	Other	tungstate ABC transporter tungstate-binding protein	tupA, CBO1946	0.907943	0.000950216	0.0121772	3.03491	1.08e-10	1.59e-09	1	1	1	14
CBO3220	CAL84781	6.5.0	Regulation	Others	FUR family transcriptional regulator	CBO3220	0.869527	0.0020592	0.021881	3.02217	1.61e-10	2.21e-09	1	1	1	15
CBO2560	CAL84118	6.5.0	Regulation	Others	FUR family transcriptional regulator	fur, CBO2560	0.972106	4.32e-05	0.00108874	2.99066	1.39e-10	1.96e-09	1	1	1	16
CBO2323	CAL83865	5.1.02	Laterally acquired elements	Phage-related functions and prophages	ATPase	CBO2323	0.93382	0.00501821	0.042966	2.85509	9.07e-09	7.27e-08	1	1	1	17
CBO1131	CAL82683	1.6.02	Adaptation	Osmotic adaptation	choline/carnitine/betaine transporter	opuD, CBO1131	0.739046	0.000305602	0.00514358	3.3484	3.77e-14	2.54e-12	1	1	1	18
CBO0478	CAL82031	1.5.02	Transport/binding proteins	Cations	cadmium-translocating P-type ATPase	CBO0478	0.603876	0.0257398	0.145708	3.27983	6.59e-11	1.05e-09	1	1	1	19
CBO1795	CAL83334	6.5.0	Regulation	Others	LexA repressor	lexA, dinR, CBO1795	0.79939	0.000162508	0.00311391	3.53351	5.11e-14	3.31e-12	1	1	1	20
CBO0097	CAL81653	6.3.14	Regulation	PadR	PadR family transcriptional regulator	CBO0097	0.883395	0.0017251	0.0191723	3.32152	2.91e-11	5.32e-10	1	1	1	21
CBO0172	CAL81725	7.0.0	Not classified	Not classified (included putative assignments)	ribosomal subunit interface protein	CBO0172	0.882755	0.00237838	0.0244791	3.23978	8.68e-11	1.32e-09	1	1	1	22
CBO0722	CAL82275	0.0.0	Unknown function	Unknown function, no known homologues	hypothetical protein	CBO0722	1.15142	4.66e-05	0.00115294	3.34628	4.57e-12	1.14e-10	1	1	1	23
CBO0183	CAL81735	7.0.0	Not classified	Not classified (included putative assignments)	pyridine nucleotide-disulfide oxidoreductase	CBO0183	0.108781	0.500621	0.806664	2.88177	1.37e-13	6.93e-12	1	1	1	24
CBO2223	CAL83764	7.0.0	Not classified	Not classified (included putative assignments)	(4Fe-4S)-binding protein	CBO2223	0.106159	0.520066	0.817822	2.86076	7.8e-11	1.21e-09	1	1	1	25
CBO3216	CAL84777	3.5.0	Energy metabolism, carbon	Energy metabolism, carbon	formate acetyltransferase 1	pflA, CBO3216	0.0791192	0.588878	0.854505	2.8626	8.48e-14	4.87e-12	1	1	1	26
CBO0182	CAL81734	6.3.13	Regulation	ArsR	transcription regulator ArsR	CBO0182	0.101928	0.401645	0.73887	2.9757	7.91e-15	7.54e-13	1	1	1	27
CBO0723	CAL82276	0.0.02	Unknown function	Conserved in other than E.coli	DJ-1/PfpI family protein	CBO0723	0.205369	0.179521	0.5002	2.75424	4.56e-11	7.7e-10	1	1	1	28
CBO2018	CAL83560	1.5.01	Transport/binding proteins	Amino acids and amines	amino acid ABC transporter substrate-binding protein	CBO2018	0.158825	0.229819	0.569821	2.7207	4.65e-09	4.04e-08	1	1	1	29
CBO3406	CAL84966	1.5.0	Transport/binding proteins	Transport/binding proteins	sodium:dicarboxylate symporter	CBO3406	0.113311	0.524539	0.819848	2.78334	2.16e-12	6.24e-11	1	1	1	30
CBO1957	CAL83499	4.1.04	Cell envelope	Surface polysaccharides & antigens	leucine-rich repeat-containing protein	CBO1957	0.0592847	0.704875	0.905259	2.75096	2.77e-09	2.56e-08	1	1	1	31
CBO2222	CAL83763	7.0.0	Not classified	Not classified (included putative assignments)	(4Fe-4S)-binding protein	CBO2222	-0.071165	0.758971	0.927251	3.07829	5.35e-11	8.78e-10	1	1	1	32
CBO2224	CAL83765	7.0.0	Not classified	Not classified (included putative assignments)	dinitrogenase iron-molybdenum cofactor family protein	CBO2224	-0.0861767	0.704255	0.905128	3.08238	2.68e-11	4.96e-10	1	1	1	33
CBO0862	CAL82415	7.0.0	Not classified	Not classified (included putative assignments)	nitroreductase	CBO0862	-0.158946	0.582199	0.85122	3.01121	8.36e-13	2.86e-11	1	1	1	34
CBO2391	CAL83938	5.1.02	Laterally acquired elements	Phage-related functions and prophages	DNA-binding phage protein	CBO2391	-0.0969275	0.369493	0.713461	2.87717	3.19e-12	8.52e-11	1	1	1	35
CBO1616	CAL83152	6.3.10	Regulation	DeoR	DeoR family transcriptional regulator	CBO1616	-0.0921251	0.557152	0.837638	2.73277	2.23e-11	4.25e-10	1	1	1	36
CBO1077	CAL82631	1.6.03	Adaptation	Fe storage	ferrous ion transport protein A	feoA, CBO1077	0.361278	0.483892	0.798838	3.41078	2.95e-11	5.37e-10	1	1	1	37
CBO1193	CAL82742	6.3.08	Regulation	TetR	TetR family transcriptional regulator	CBO1193	0.35938	0.272884	0.621257	3.40746	9.84e-12	2.14e-10	1	1	1	38
CBO0565	CAL82119	1.5.0	Transport/binding proteins	Transport/binding proteins	Sodium:dicarboxylate symporter	CBO0565	0.067763	0.727878	0.916076	3.5725	1.2e-12	3.84e-11	1	1	1	39
CBO1918	CAL83459	0.0.0	Unknown function	Unknown function, no known homologues	hypothetical protein	CBO1918	0.105855	0.377053	0.719639	3.36846	5.95e-13	2.22e-11	1	1	1	40
CBO2672	CAL84233	0.0.01	Unknown function	Conserved in E.coli	hypothetical protein	CBO2672	0.220642	0.279331	0.628554	3.12595	2.54e-12	7.11e-11	1	1	1	41
CBO3053	CAL84616	6.5.0	Regulation	Others	sigma-E factor regulator, RseC/MucC family	CBO3053	0.214228	0.101745	0.363899	3.12709	6.1e-13	2.26e-11	1	1	1	42
CBO3215	CAL84776	3.5.0	Energy metabolism, carbon	Energy metabolism, carbon	pyruvate formate-lyase activating enzyme	act, CBO3215	0.205621	0.130269	0.419622	3.12228	1.32e-15	1.81e-13	1	1	1	43
CBO0733	CAL82286	5.1.02	Laterally acquired elements	Phage-related functions and prophages	DNA-binding protein	CBO0733	0.143695	0.278895	0.628072	3.12553	5.06e-09	4.34e-08	1	1	1	44
CBO2774	CAL84337	4.1.07	Cell envelope	G+ exported/lipoprotein	hypothetical protein	CBO2774	1.85636	2.5e-09	7.21e-07	3.89791	3.11e-15	3.62e-13	1	1	2	45
CBO0116	CAL81672	0.0.02	Unknown function	Conserved in other than E.coli	hypothetical protein	CBO0116	1.69004	1.04e-06	5.71e-05	3.6814	5.24e-12	1.26e-10	1	1	2	46
CBO0721	CAL82274	1.5.0	Transport/binding proteins	Transport/binding proteins	ABC transporter ATP-binding protein	CBO0721	1.56369	2.84e-06	0.000125061	3.90276	6.14e-14	3.82e-12	1	1	2	47
CBO3326	CAL84884	4.1.06	Cell envelope	G+ membrane	hypothetical protein	CBO3326	1.47207	1.25e-06	6.6e-05	3.79204	1.13e-13	5.98e-12	1	1	2	48
CBO0337	CAL81890	4.1.06	Cell envelope	G+ membrane	hypothetical protein	CBO0337	1.19125	2.54e-07	2e-05	3.99254	2.6e-14	1.88e-12	1	1	2	49
CBO1354	CAL82900	1.1.01	Cell processes	Chemotaxis and mobility	methyl-accepting chemotaxis protein	CBO1354	1.15179	7.26e-06	0.000252626	3.70491	3.31e-12	8.72e-11	1	1	2	50
CBO1333	CAL82880	3.5.02	Energy metabolism, carbon	Anaerobic respiration	nitrate reductase, NADH oxidase subunit	CBO1333	2.23214	5.26e-09	1.16e-06	3.28145	7.32e-12	1.67e-10	1	1	2	51
CBO2802	CAL84365	2.2.11	Macromolecule synthesis, modification	RNA synthesis, modification, DNA transcription	ATP-dependent RNA helicase, DEAD/DEAH box family	deaD, csdA, mssB, CBO2802	2.12646	1.15e-09	3.94e-07	3.13212	5.81e-13	2.18e-11	1	1	2	52
CBO0117	CAL81673	7.0.0	Not classified	Not classified (included putative assignments)	LysM domain-containing protein	CBO0117	2.24113	8.14e-11	5.1e-08	3.70196	1.34e-13	6.84e-12	1	1	2	53
CBO1788	CAL83327	4.1.06	Cell envelope	G+ membrane	hypothetical protein	CBO1788	0.779355	0.00128856	0.0153207	4.19499	2.75e-14	1.98e-12	1	1	2	54
CBO3324	CAL84882	0.0.02	Unknown function	Conserved in other than E.coli	hypothetical protein	CBO3324	0.762298	0.0013046	0.0154248	4.09709	1.95e-12	5.78e-11	1	1	2	55
CBO0860	CAL82413	7.0.0	Not classified	Not classified (included putative assignments)	hypothetical protein	CBO0860	0.659717	0.00427016	0.0382685	4.19578	2.07e-14	1.61e-12	1	1	2	56
CBO2788	CAL84351	4.1.06	Cell envelope	G+ membrane	ABC transporter permease	CBO2788	0.547975	0.000989044	0.0125724	4.0897	4e-17	1.43e-14	1	1	2	57
CBO1502	CAL83044	0.0.02	Unknown function	Conserved in other than E.coli	MORN repeat protein	CBO1502	0.442806	0.0218627	0.130077	3.80159	4.57e-13	1.78e-11	1	1	2	58
CBO0894	CAL82446	7.0.0	Not classified	Not classified (included putative assignments)	peptidyl-arginine deiminase	CBO0894	0.436779	0.0101193	0.0733859	3.5903	3.27e-15	3.7e-13	1	1	2	59
CBO1177	CAL82727	1.5.02	Transport/binding proteins	Cations	zinc transporter	CBO1177	0.691668	0.121303	0.40273	3.81769	5.76e-15	5.81e-13	1	1	2	60
CBO2581	CAL84139	1.5.0	Transport/binding proteins	Transport/binding proteins	MATE efflux family protein	CBO2581	0.122189	0.553398	0.8361	4.08936	3.11e-14	2.19e-12	1	1	2	61
CBO1106	CAL82659	4.1.06	Cell envelope	G+ membrane	hypothetical protein	CBO1106	2.18888	2.05e-06	9.78e-05	2.61732	1.76e-11	3.47e-10	1	1	3	62
CBO1332	CAL82879	3.5.02	Energy metabolism, carbon	Anaerobic respiration	nitrate reductase, iron-sulfur subunit	CBO1332	2.05435	1.34e-08	2.4e-06	2.43461	1.14e-10	1.66e-09	1	1	3	63
CBO1331	CAL82878	3.5.02	Energy metabolism, carbon	Anaerobic respiration	oxidoreductase, acetyl-CoA synthase subunit	CBO1331	1.87562	2.56e-08	3.44e-06	2.28501	1.5e-10	2.08e-09	1	1	3	64
CBO1330	CAL82877	6.5.0	Regulation	Others	transcriptional regulator	CBO1330	1.74439	4.53e-08	5.2e-06	2.80016	3.25e-10	4.04e-09	1	1	3	65
CBO0835	CAL82388	1.4.0	Protection responses	Protection responses	nitroimidazole resistance protein	CBO0835	1.62039	8.73e-07	5.05e-05	2.52436	9.58e-10	1.03e-08	1	1	3	66
CBO2366	CAL83911	5.1.02	Laterally acquired elements	Phage-related functions and prophages	nitroimidazole resistance protein	CBO2366	1.56551	1.17e-07	1.08e-05	3.03415	2.13e-12	6.19e-11	1	1	3	67
CBO3294	CAL84852	1.5.01	Transport/binding proteins	Amino acids and amines	branched chain amino acid ABC transporter carrier protein	CBO3294	1.40082	4.95e-07	3.28e-05	2.9654	2.34e-13	1.07e-11	1	1	3	68
CBO1101	CAL82654	1.5.01	Transport/binding proteins	Amino acids and amines	sodium:alanine symporter	CBO1101	1.28064	3.84e-06	0.000157284	2.87097	5.03e-11	8.34e-10	1	1	3	69
CBO0064	CAL81620	0.0.02	Unknown function	Conserved in other than E.coli	hypothetical protein	CBO0064	1.30337	3.34e-06	0.000141567	2.80363	5.37e-11	8.79e-10	1	1	3	70
CBO3272	CAL84831	0.0.02	Unknown function	Conserved in other than E.coli	TrpR family protein	CBO3272	1.28139	7.45e-06	0.00025701	2.33894	9.77e-10	1.05e-08	1	1	3	71
CBO1387	CAL82930	1.6.01	Adaptation	Adaptations, atypical conditions	major cold shock protein	cspB, CBO1387	1.12055	1.22e-05	0.000383246	2.22762	5.06e-09	4.34e-08	1	1	3	72
CBO2562	CAL84120	0.0.02	Unknown function	Conserved in other than E.coli	Holliday junction resolvase-like protein	CBO2562	1.44378	1.5e-08	2.44e-06	2.10285	6.13e-13	2.26e-11	1	1	3	73
CBO0496	CAL82050	0.0.0	Unknown function	Unknown function, no known homologues	hypothetical protein	CBO0496	1.12982	3.39e-05	0.000895501	2.02835	9.38e-09	7.49e-08	1	1	3	74
CBO1238	CAL82787	0.0.02	Unknown function	Conserved in other than E.coli	hypothetical protein	CBO1238	1.07706	0.00349727	0.0328969	2.07139	8.31e-08	5.24e-07	1	1	3	75
CBO1309	CAL82856	4.1.06	Cell envelope	G+ membrane	protease	CBO1309	0.983608	0.00242221	0.0247683	2.01053	2.55e-11	4.75e-10	1	1	3	76
CBO1289	CAL82838	2.2.03	Macromolecule synthesis, modification	DNA - replication, repair, restriction/modification	DNA topoisomerase III	CBO1289	0.996924	7.22e-06	0.000251798	2.40286	1.21e-10	1.75e-09	1	1	3	77
CBO0421	CAL81974	1.5.02	Transport/binding proteins	Cations	Na+/H+ antiporter family protein	CBO0421	0.960744	0.0001038	0.00215786	2.37589	3.66e-11	6.41e-10	1	1	3	78
CBO1068	CAL82622	3.5.02	Energy metabolism, carbon	Anaerobic respiration	FAD-dependent oxidoreductase	glpA, CBO1068	1.01557	0.00595575	0.049071	2.30728	1.11e-06	5.47e-06	1	1	3	79
CBO0963	CAL82517	1.5.02	Transport/binding proteins	Cations	molybdenum ABC transporter ATP-binding protein	CBO0963	0.987771	6.12e-06	0.000219437	2.54894	4.91e-13	1.89e-11	1	1	3	80
CBO1090	CAL82643	0.0.02	Unknown function	Conserved in other than E.coli	hypothetical protein	CBO1090	0.799316	0.0017727	0.0195357	2.37946	1.08e-12	3.55e-11	1	1	3	81
CBO3429	CAL84989	0.0.02	Unknown function	Conserved in other than E.coli	oxidoreductase, FAD-binding	CBO3429	0.49352	0.167427	0.480802	2.25355	2.92e-06	1.33e-05	1	2	4	82
CBO3311	CAL84869	2.1.04	Macromolecule degradation	Degradation of proteins, peptides, glycoproteins	peptidase	CBO3311	0.506327	0.0111727	0.0790934	2.22779	1.02e-10	1.51e-09	1	2	4	83
CBO3575	CAL85134	6.3.02	Regulation	AraC	AraC family transcriptional regulator	CBO3575	0.451201	0.00283841	0.02797	2.25615	5.85e-13	2.19e-11	1	2	4	84
CBO3175	CAL84736	0.0.02	Unknown function	Conserved in other than E.coli	recombination regulator RecX	recX, CBO3175	0.480555	0.00286722	0.0281833	2.16631	3.74e-12	9.6e-11	1	2	4	85
CBO0058	CAL81614	7.0.0	Not classified	Not classified (included putative assignments)	hypothetical protein	CBO0058	0.467997	0.00840097	0.0640533	2.17528	7.56e-10	8.4e-09	1	2	4	86
CBO0623	CAL82176	6.3.02	Regulation	AraC	AraC family transcriptional regulator	CBO0623	0.419477	0.00528327	0.0446285	2.18055	1.31e-12	4.12e-11	1	2	4	87
CBO0573	CAL82126	7.0.0	Not classified	Not classified (included putative assignments)	tRNA-binding protein	CBO0573	0.625905	0.0280449	0.1541	2.24676	6.61e-08	4.25e-07	1	2	4	88
CBO0343	CAL81896	1.5.01	Transport/binding proteins	Amino acids and amines	amino acid permease	CBO0343	0.55288	0.000766022	0.0104552	2.18472	1.51e-11	3.06e-10	1	2	4	89
CBO2350	CAL83893	5.1.02	Laterally acquired elements	Phage-related functions and prophages	phage capsid protein	CBO2350	0.556344	0.00505286	0.0430606	2.39418	3.17e-11	5.69e-10	1	2	4	90
CBO1999	CAL83542	3.3.08	Central intermediary metabolism	Misc. glycerol metabolism	glycerol dehydrogenase	gldA2, CBO1999	0.548281	0.0927641	0.343732	2.39457	1.54e-09	1.55e-08	1	2	4	91
CBO2245	CAL83784	6.3.12	Regulation	MerR	MerR family transcriptional regulator	CBO2245	0.516707	0.213583	0.547845	2.36952	5.02e-11	8.34e-10	1	2	4	92
CBO2902	CAL84466	1.5.01	Transport/binding proteins	Amino acids and amines	sodium/amino acid (alanine) symporter	CBO2902	0.446697	0.0585919	0.255396	2.3114	1.55e-09	1.56e-08	1	2	4	93
CBO1179	CAL82729	3.1.06	Amino acid biosynthesis	Cysteine	cysteine synthase A	cysK2, CBO1179	0.423108	0.114834	0.390844	2.31645	2.72e-08	1.92e-07	1	2	4	94
CBOP07	CAL81540	0.0.0	Unknown function	Unknown function, no known homologues	hypothetical protein	CBOP07	0.461192	0.00382792	0.0352487	2.35158	8.02e-13	2.78e-11	1	2	4	95
CBO0011	CAL81565	4.1.06	Cell envelope	G+ membrane	hypothetical protein	CBO0011	0.713077	0.000640549	0.00909776	2.16614	6.52e-08	4.2e-07	1	2	4	96
CBO2799	CAL84362	0.0.0	Unknown function	Unknown function, no known homologues	hypothetical protein	CBO2799	0.710885	0.000945923	0.012165	2.1602	3.31e-10	4.1e-09	1	2	4	97
CBO1174	CAL82725	7.0.0	Not classified	Not classified (included putative assignments)	diamine N-acetyltransferase	CBO1174	0.792223	0.00324873	0.0309475	2.1481	2.4e-09	2.26e-08	1	2	4	98
CBO1784	CAL83323	1.6.03	Adaptation	Fe storage	ferritin	ftnA, CBO1784	0.601263	0.245156	0.589306	2.10436	1.61e-08	1.2e-07	1	2	4	99
CBO3430	CAL84990	4.1.07	Cell envelope	G+ exported/lipoprotein	hypothetical protein	CBO3430	0.587084	0.0019026	0.0205782	2.09776	2.72e-09	2.52e-08	1	2	4	100
CBO2800	CAL84363	3.2.12	Biosynthesis of cofactors, carriers	Pyridoxine	pyridoxal biosynthesis lyase PdxS	pyroA, CBO2800	0.663968	0.00465222	0.0406505	2.03864	4.9e-10	5.78e-09	1	2	4	101
CBO0693	CAL82245	1.1.01	Cell processes	Chemotaxis and mobility	methyl-accepting chemotaxis protein	CBO0693	0.312899	0.0654116	0.274942	2.20523	2.67e-11	4.96e-10	1	2	4	102
CBO1112	CAL82665	7.0.0	Not classified	Not classified (included putative assignments)	GNAT family acetyltransferase	CBO1112	0.320701	0.0848534	0.326409	2.16209	1.98e-10	2.63e-09	1	2	4	103
CBO3611	CAL85169	0.0.02	Unknown function	Conserved in other than E.coli	hypothetical protein	CBO3611	0.283747	0.137509	0.432252	2.13845	7.61e-12	1.73e-10	1	2	4	104
CBO0439	CAL81992	7.0.0	Not classified	Not classified (included putative assignments)	phospholipase	CBO0439	0.279697	0.0293814	0.15966	2.13929	1.17e-11	2.45e-10	1	2	4	105
CBO0625	CAL82178	0.0.02	Unknown function	Conserved in other than E.coli	hypothetical protein	CBO0625	0.260739	0.208331	0.53976	2.23568	7.39e-11	1.15e-09	1	2	4	106
CBO0425	CAL81978	3.2.10	Biosynthesis of cofactors, carriers	Pantothenate	3-methyl-2-oxobutanoate hydroxymethyltransferase	panB, CBO0425	0.258491	0.428401	0.759404	2.22533	4.68e-11	7.88e-10	1	2	4	107
CBO0734	CAL82287	5.1.02	Laterally acquired elements	Phage-related functions and prophages	DNA-binding protein	CBO0734	0.269057	0.0705043	0.289618	2.25581	1.11e-12	3.63e-11	1	2	4	108
CBO2482	CAL84031	3.5.04	Energy metabolism, carbon	Fermentation	electron transferring subunit of proline reductase	prdC2, CBO2482	0.210754	0.431103	0.761763	2.17947	1.48e-11	3.01e-10	1	2	4	109
CBO2466	CAL84016	7.0.0	Not classified	Not classified (included putative assignments)	electron transferring subunit of proline reductase	prdC1, CBO2466	0.196602	0.216592	0.551902	2.13114	6.04e-08	3.92e-07	1	2	4	110
CBO2475	CAL84025	3.5.04	Energy metabolism, carbon	Fermentation	PrdE protein	prdE, CBO2475	0.160205	0.504681	0.80886	2.16978	2.07e-08	1.52e-07	1	2	4	111
CBO0285	CAL81837	7.0.0	Not classified	Not classified (included putative assignments)	2-hydroxychromene-2-carboxylate isomerase	CBO0285	0.438789	0.0335465	0.17504	2.10107	8.43e-12	1.88e-10	1	2	4	112
CBO0234	CAL81786	2.2.10	Macromolecule synthesis, modification	Proteins - translation and modification	SsrA-binding protein	smpB, smqB, CBO0234	0.444037	0.0229838	0.134911	2.08475	4.85e-10	5.72e-09	1	2	4	113
CBO1945	CAL83487	1.5.05	Transport/binding proteins	Other	tungstate ABC transporter permease	tupB, CBO1945	0.404949	0.0141079	0.0935199	2.10375	2.68e-09	2.49e-08	1	2	4	114
CBO0364	CAL81917	7.0.0	Not classified	Not classified (included putative assignments)	hypothetical protein	CBO0364	0.459722	0.0377435	0.189343	2.03683	6.63e-09	5.53e-08	1	2	4	115
CBO0252	CAL81804	7.0.0	Not classified	Not classified (included putative assignments)	GNAT family acetyltransferase	CBO0252	0.370322	0.00657437	0.0531113	2.05588	1.05e-09	1.1e-08	1	2	4	116
CBO1844	CAL83384	4.1.06	Cell envelope	G+ membrane	hypothetical protein	CBO1844	0.306922	0.0598081	0.258643	2.03768	3.43e-09	3.07e-08	1	2	4	117
CBO3160	CAL84721	0.0.02	Unknown function	Conserved in other than E.coli	hypothetical protein	CBO3160	0.316268	0.0547825	0.244432	2.01397	2.34e-08	1.69e-07	1	2	4	118
CBO2949	CAL84511	0.0.02	Unknown function	Conserved in other than E.coli	metalloprotease	CBO2949	0.26549	0.0707849	0.29024	2.01637	1.69e-07	9.95e-07	1	2	4	119
CBO2853A	CAL84419	5.1.04	Laterally acquired elements	Transposon-related functions	putative transposase (partial)	CBO2853A	0.496867	0.0220124	0.130743	2.5501	0.000799306	0.00230801	1	2	5	120
CBO0556	CAL82109	4.1.06	Cell envelope	G+ membrane	proton-coupled thiamine transporter YuaJ	CBO0556	0.457387	0.0349884	0.180115	2.5034	1.56e-10	2.15e-09	1	2	5	121
CBO3174	CAL84735	4.1.06	Cell envelope	G+ membrane	transglutaminase domain protein	CBO3174	0.581719	0.00104971	0.0131418	2.59877	1.33e-10	1.89e-09	1	2	5	122
CBO3010	CAL84571	0.0.02	Unknown function	Conserved in other than E.coli	hypothetical protein	CBO3010	0.37798	0.059169	0.25717	2.53165	4.09e-11	7.04e-10	1	2	5	123
CBO3222	CAL84783	4.1.0	Cell envelope	Periplasmic/exported/lipoproteins	hypothetical protein	CBO3222	0.373024	0.00591841	0.0488144	2.52983	4.06e-13	1.65e-11	1	2	5	124
CBO2019	CAL83561	0.0.02	Unknown function	Conserved in other than E.coli	hypothetical protein	CBO2019	0.417551	0.0391539	0.193094	2.55292	3.22e-11	5.75e-10	1	2	5	125
CBO1385	CAL82928	7.0.0	Not classified	Not classified (included putative assignments)	nitroreductase	CBO1385	0.277407	0.0432603	0.207367	2.49349	3.41e-11	6.01e-10	1	2	5	126
CBO3337	CAL84894	3.1.13	Amino acid biosynthesis	Lysine	aspartokinase	lysC, CBO3337	0.285817	0.115472	0.391681	2.4703	3.19e-11	5.72e-10	1	2	5	127
CBO1845	CAL83385	4.1.06	Cell envelope	G+ membrane	hypothetical protein	CBO1845	0.334792	0.158186	0.466788	2.44283	6.53e-05	0.000230523	1	2	5	128
CBO2772	CAL84335	1.5.02	Transport/binding proteins	Cations	transporter monovalent cation:proton antiporter-2 (CPA2) family	CBO2772	0.285539	0.0443126	0.211062	2.42058	1.89e-13	8.98e-12	1	2	5	129
CBO1049	CAL82603	6.3.02	Regulation	AraC	AraC family transcriptional regulator	CBO1049	0.334307	0.0417779	0.202544	2.3412	1.84e-11	3.6e-10	1	2	5	130
CBO1113	CAL82666	3.2.15	Biosynthesis of cofactors, carriers	Thioredoxin, glutaredoxin, glutathione	hypothetical protein	CBO1113	0.281825	0.112701	0.387242	2.36067	2.22e-11	4.22e-10	1	2	5	131
CBO0598	CAL82151	6.3.14	Regulation	PadR	PadR family transcriptional regulator	CBO0598	0.165008	0.206392	0.537035	2.6444	4.87e-14	3.18e-12	1	2	5	132
CBO1304	CAL82852	1.5.05	Transport/binding proteins	Other	copper-translocating P-type ATPase	CBO1304	0.171016	0.433747	0.763948	2.56494	2.01e-11	3.88e-10	1	2	5	133
CBO1194	CAL82743	1.5.02	Transport/binding proteins	Cations	transporter monovalent cation:proton antiporter-2 (CPA2) family	CBO1194	0.0872318	0.771097	0.931937	2.66677	2.85e-08	2.01e-07	1	2	5	134
CBO2204	CAL83745	0.0.02	Unknown function	Conserved in other than E.coli	hypothetical protein	CBO2204	0.075437	0.687825	0.898655	2.51316	1.56e-12	4.75e-11	1	2	5	135
CBO2309	CAL83850	4.1.06	Cell envelope	G+ membrane	hypothetical protein	CBO2309	0.236299	0.198621	0.527404	2.61297	1.03e-10	1.52e-09	1	2	5	136
CBO1628	CAL83163	6.5.0	Regulation	Others	signal-transduction and transcriptional-control protein	acoR, CBO1628	0.282149	0.13981	0.436863	2.55757	5.44e-13	2.06e-11	1	2	5	137
CBO1180	CAL82730	1.5.01	Transport/binding proteins	Amino acids and amines	amino acid ABC transporter permease	CBO1180	0.306101	0.0649358	0.27382	2.70431	4.91e-13	1.89e-11	1	2	5	138
CBO2757	CAL84318	7.0.0	Not classified	Not classified (included putative assignments)	HAD-superfamily hydrolase	CBO2757	0.282738	0.188262	0.512593	2.707	6.67e-11	1.06e-09	1	2	5	139
CBO0198	CAL81750	2.2.07	Macromolecule synthesis, modification	Phospholipids	CDP-diacylglycerol--serine O-phosphatidyltransferase	CBO0198	0.35043	0.226244	0.565142	2.72194	4.13e-09	3.64e-08	1	2	5	140
CBO0316	CAL81868	1.5.05	Transport/binding proteins	Other	xanthine/uracil permease	pbuX, CBO0316	0.0600848	0.663587	0.887698	2.18228	4.62e-12	1.15e-10	1	2	5	141
CBO3379	CAL84938	7.0.0	Not classified	Not classified (included putative assignments)	hydrolase	CBO3379	0.0405591	0.766159	0.929538	2.199	1.35e-12	4.18e-11	1	2	5	142
CBO0184	CAL81736	0.0.02	Unknown function	Conserved in other than E.coli	hypothetical protein	CBO0184	0.0253434	0.897372	0.974062	2.15564	1.01e-09	1.07e-08	1	2	5	143
CBO1005	CAL82558	1.5.03	Transport/binding proteins	Carbohydrates, organic acids and alcohols	L-lactate permease	glcA, CBO1005	-0.121172	0.523333	0.819131	2.20439	3.6e-10	4.41e-09	1	2	5	144
CBO1912	CAL83453	3.1.13	Amino acid biosynthesis	Lysine	diaminopimelate epimerase	dapF, CBO1912	-0.0613047	0.703314	0.905128	2.03317	9.23e-11	1.39e-09	1	2	5	145
CBO2934	CAL84496	0.0.02	Unknown function	Conserved in other than E.coli	hypothetical protein	CBO2934	0.0820364	0.483207	0.798593	2.01765	3.7e-13	1.57e-11	1	2	5	146
CBO0424	CAL81977	3.2.10	Biosynthesis of cofactors, carriers	Pantothenate	pantoate--beta-alanine ligase	panC, CBO0424	0.0350237	0.837969	0.954305	2.01626	3.1e-10	3.87e-09	1	2	5	147
CBO2020	CAL83562	7.0.0	Not classified	Not classified (included putative assignments)	class V aminotransferase	CBO2020	0.0631174	0.625416	0.871146	2.08205	8.44e-13	2.89e-11	1	2	5	148
CBO1006	CAL82559	0.0.02	Unknown function	Conserved in other than E.coli	hypothetical protein	CBO1006	0.152146	0.537793	0.827054	2.03683	4e-08	2.71e-07	1	2	5	149
CBOP08	CAL81541	0.0.0	Unknown function	Unknown function, no known homologues	hypothetical protein	CBOP08	-0.533853	0.00119172	0.0145268	2.08363	1.91e-09	1.86e-08	1	2	5	150
CBO1183	CAL82733	0.0.02	Unknown function	Conserved in other than E.coli	hypothetical protein	CBO1183	0.096235	0.504922	0.809079	2.41292	6.15e-12	1.45e-10	1	2	5	151
CBO2221	CAL83762	7.0.0	Not classified	Not classified (included putative assignments)	nitrogenase iron-molybdenum cofactor protein	CBO2221	0.0914677	0.622151	0.869906	2.40573	7.17e-09	5.91e-08	1	2	5	152
CBO1182	CAL82732	3.1.01	Amino acid biosynthesis	Alanine	cysteine desulfhydrase	iscS, CBO1182	0.143831	0.498432	0.805735	2.40118	5.58e-10	6.48e-09	1	2	5	153
CBO2479	CAL84028	0.0.0	Unknown function	Unknown function, no known homologues	hypothetical protein	CBO2479	0.11466	0.646815	0.881114	2.34496	4.82e-11	8.06e-10	1	2	5	154
CBO0685	CAL82237	6.3.02	Regulation	AraC	AraC family transcriptional regulator	CBO0685	-0.0698805	0.706709	0.906692	2.42858	1.55e-10	2.14e-09	1	2	5	155
CBO2480	CAL84029	3.5.04	Energy metabolism, carbon	Fermentation	subunit of proline reductase	prdA2, CBO2480	-0.10447	0.720973	0.91389	2.35799	1.87e-08	1.38e-07	1	2	5	156

## Sheet: 3. k-means cluster 2
locus_tag	EMBL	Classnum	Main class	Subclass	Product	Gene symbol	1h_log2	1h_p-value	1h_FDR	5h_log2	5h_p-value	5h_FDR	k-means_cluster	hcl_subcluster	hcl_subcluster	hcl_row
CBO1499	CAL83041	1.5.01	Transport/binding proteins	Amino acids and amines	D-methionine ABC transporter ATP-binding protein	metN2, CBO1499	0.271582	0.202934	0.532885	-3.94408	2.88e-11	5.27e-10	2	1	1	1
CBO3596	CAL85155	3.6.0	Fatty acid biosynthesis	Fatty acid biosynthesis	biotin carboxylase	accC, fabG, CBO3596	0.0786854	0.714338	0.910099	-3.95433	1.27e-13	6.61e-12	2	1	1	2
CBO2615	CAL84174	7.0.0	Not classified	Not classified (included putative assignments)	thiosulfate sulfurtransferase	CBO2615	-0.202623	0.428293	0.759404	-3.65732	4.66e-11	7.85e-10	2	1	1	3
CBO1141	CAL82693	1.4.02	Protection responses	Detoxification	thiosulfate sulfurtransferase	CBO1141	-0.399048	0.0844338	0.325225	-3.64393	3.56e-14	2.42e-12	2	1	1	4
CBO3597	CAL85156	3.6.0	Fatty acid biosynthesis	Fatty acid biosynthesis	(3R)-hydroxymyristoyl-ACP dehydratase	fabZ, sefA, CBO3597	0.353735	0.146701	0.447357	-3.6052	7.67e-12	1.74e-10	2	1	1	5
CBO3254	CAL84815	4.1.07	Cell envelope	G+ exported/lipoprotein	lipoprotein	CBO3254	0.0126494	0.927642	0.982485	-3.49714	6.35e-14	3.9e-12	2	1	1	6
CBO2483	CAL84032	7.0.0	Not classified	Not classified (included putative assignments)	putative proline reductase (partial)	prdA3, CBO2483	-0.0346445	0.785897	0.937228	-3.56405	1.58e-13	7.73e-12	2	1	1	7
CBO3248	CAL84810	1.5.0	Transport/binding proteins	Transport/binding proteins	putative ABC transporter, permease protein	CBO3248	0.181074	0.468271	0.788451	-3.51726	1.93e-13	9.11e-12	2	1	1	8
CBO0922	CAL82475	0.0.02	Unknown function	Conserved in other than E.coli	hypothetical protein	CBO0922	0.0954366	0.434648	0.76431	-3.48231	1.4e-15	1.89e-13	2	1	1	9
CBO1492	CAL83034	3.5.0	Energy metabolism, carbon	Energy metabolism, carbon	CobW/P47K family protein	cobW, CBO1492	0.0784161	0.740663	0.921117	-3.49242	6.48e-12	1.51e-10	2	1	1	10
CBO1152	CAL82704	2.1.04	Macromolecule degradation	Degradation of proteins, peptides, glycoproteins	peptidase	CBO1152	-0.192855	0.302883	0.65263	-3.11561	6.06e-13	2.25e-11	2	1	1	11
CBO0920	CAL82473	3.2.06	Biosynthesis of cofactors, carriers	Heme, porphyrin	porphobilinogen deaminase	hemC, popE, CBO0920	-0.0765295	0.745745	0.922882	-3.17831	2.38e-12	6.8e-11	2	1	1	12
CBO1985	CAL83528	1.3.01	Cell processes	Chaperones	heat shock protein 90	htpG, CBO1985	-0.136493	0.544577	0.831879	-3.15549	4.82e-08	3.2e-07	2	1	1	13
CBO0145	CAL81700	3.3.11	Central intermediary metabolism	Nucleotide interconversions	uracil phosphoribosyltransferase	upp, CBO0145	-0.179468	0.333474	0.681966	-3.32911	7.51e-10	8.35e-09	2	1	1	14
CBO1493	CAL83035	3.5.0	Energy metabolism, carbon	Energy metabolism, carbon	methylcobalamin:coenzyme M methyltransferase	CBO1493	-0.10205	0.561523	0.840949	-3.23729	1.74e-11	3.45e-10	2	1	1	15
CBO3191	CAL84752	0.0.02	Unknown function	Conserved in other than E.coli	hypothetical protein	CBO3191	-0.157599	0.449201	0.775543	-3.25241	4.85e-09	4.19e-08	2	1	1	16
CBO0751	CAL82305	1.4.02	Protection responses	Detoxification	arsenate reductase	arsC, CBO0751	-0.65169	0.0015092	0.017372	-3.256	1.47e-13	7.31e-12	2	1	1	17
CBO1804	CAL83343	3.3.20	Central intermediary metabolism	Amino acids	aspartate aminotransferase	aspC, CBO1804	-0.60154	0.0282779	0.15511	-3.31966	4.31e-11	7.36e-10	2	1	1	18
CBO1515	CAL83056	1.5.0	Transport/binding proteins	Transport/binding proteins	carbohydrate uptake ABC transporter CUT1 family, ATP-binding protein	CBO1515	-0.602269	0.00652003	0.0528079	-3.11294	2.48e-12	6.99e-11	2	1	1	19
CBO2484	CAL84033	7.0.0	Not classified	Not classified (included putative assignments)	electron transferring subunit of proline reductase	prdC3, CBO2484	-0.403523	0.165747	0.477633	-3.06588	1.29e-09	1.33e-08	2	1	1	20
CBO2997	CAL84559	1.7.01	Cell division	Cell division	septum site-determining protein MinD	minD, divIVB, CBO2997	-0.509712	0.00385721	0.0354561	-3.03318	1.05e-11	2.25e-10	2	1	1	21
CBO3247	CAL84809	1.5.0	Transport/binding proteins	Transport/binding proteins	ABC transporter ATP-binding protein	CBO3247	-0.404447	0.0248653	0.142864	-3.21134	6.69e-14	4.05e-12	2	1	1	22
CBO0360	CAL81913	7.0.0	Not classified	Not classified (included putative assignments)	metal dependent phosphohydrolase	CBO0360	-0.315999	0.127256	0.41385	-3.22169	1.49e-12	4.56e-11	2	1	1	23
CBO3256	CAL84817	1.5.0	Transport/binding proteins	Transport/binding proteins	permease	CBO3256	-0.345459	0.119266	0.399546	-3.27237	2.5e-11	4.69e-10	2	1	1	24
CBO2938	CAL84500	6.2.01	Regulation	sigma factor	RNA polymerase sigma factor RpoD	sigA, rpoD, CBO2938	-0.362174	0.0238265	0.138617	-3.42475	7.71e-16	1.17e-13	2	1	1	25
CBO1557	CAL83097	0.0.02	Unknown function	Conserved in other than E.coli	hypothetical protein	CBO1557	-0.452804	0.0138886	0.0924557	-3.32055	7.11e-11	1.12e-09	2	1	1	26
CBO1981	CAL83524	7.0.0	Not classified	Not classified (included putative assignments)	4-carboxymuconolactone decarboxylase	CBO1981	-0.515325	0.0389462	0.192683	-3.26241	2.22e-12	6.41e-11	2	1	1	27
CBO1497	CAL83039	0.0.0	Unknown function	Unknown function, no known homologues	hypothetical protein	CBO1497	0.455606	0.0345802	0.178591	-3.22279	1.35e-10	1.91e-09	2	1	2	28
CBO3598	CAL85157	3.6.0	Fatty acid biosynthesis	Fatty acid biosynthesis	acetyl-CoA carboxylase biotin carboxyl carrier protein	accB, fabE, CBO3598	0.360598	0.201276	0.531366	-3.24662	8.77e-10	9.49e-09	2	1	2	29
CBO0925	CAL82478	3.2.03	Biosynthesis of cofactors, carriers	Cobalamin	precorrin-8X methylmutase	cobH, cbiC, CBO0925	0.171824	0.268899	0.617426	-3.16406	3.73e-13	1.58e-11	2	1	2	30
CBO3250	CAL84811	0.0.0	Unknown function	Unknown function, no known homologues	hypothetical protein	CBO3250	0.177071	0.413164	0.747398	-3.22089	1.08e-09	1.14e-08	2	1	2	31
CBO3252	CAL84813	0.0.0	Unknown function	Unknown function, no known homologues	hypothetical protein	CBO3252	0.504195	0.0515224	0.233819	-2.76849	2.02e-09	1.96e-08	2	1	2	32
CBO3605	CAL85165	3.6.0	Fatty acid biosynthesis	Fatty acid biosynthesis	oxidoreductase, 2-nitropropane dioxygenase	CBO3605	0.168123	0.659778	0.886369	-2.9942	1.24e-05	4.95e-05	2	1	2	33
CBO3603	CAL85162	3.6.0	Fatty acid biosynthesis	Fatty acid biosynthesis	acyl carrier protein	acpP, CBO3603	0.251929	0.0614012	0.263289	-2.82437	3.18e-08	2.2e-07	2	1	2	34
CBO3595	CAL85154	3.6.0	Fatty acid biosynthesis	Fatty acid biosynthesis	acetyl-CoA carboxylase carboxyl transferase subunit beta	accD, dedB, usg, CBO3595	0.226548	0.252739	0.597111	-2.88218	2.98e-08	2.08e-07	2	1	2	35
CBO1518	CAL83059	1.5.0	Transport/binding proteins	Transport/binding proteins	carbohydrate uptake ABC transporter CUT1 family, carbohydrate-binding protein	CBO1518	0.0695974	0.731992	0.918006	-2.82659	1.77e-11	3.48e-10	2	1	2	36
CBO3054	CAL84617	2.2.01	Macromolecule synthesis, modification	Amino acyl tRNA synthesis; tRNA modification	aspartyl-tRNA synthetase	aspS, CBO3054	0.14904	0.386952	0.725985	-2.83602	7.94e-13	2.77e-11	2	1	2	37
CBO1989	CAL83532	6.3.03	Regulation	GntR	trehalose operon repressor	treR, CBO1989	0.125719	0.623598	0.870614	-2.84775	1.1e-07	6.75e-07	2	1	2	38
CBO3227	CAL84789	7.0.0	Not classified	Not classified (included putative assignments)	ribosome biogenesis GTP-binding protein YsxC	engB, yihA, ysxC, CBO3227	0.0926867	0.720571	0.913601	-2.64216	5.61e-13	2.11e-11	2	1	2	39
CBO0918	CAL82471	1.5.02	Transport/binding proteins	Cations	cobalt ABC transporter permease	cbiQ, CBO0918	0.043082	0.873178	0.966873	-2.72215	2.69e-10	3.43e-09	2	1	2	40
CBO0456	CAL82009	1.5.01	Transport/binding proteins	Amino acids and amines	high-affinity branched chain amino acid ABC transporter ATP-binding protein	CBO0456	-0.0485417	0.722029	0.914432	-2.6028	3.64e-12	9.37e-11	2	1	2	41
CBO1495	CAL83037	3.5.0	Energy metabolism, carbon	Energy metabolism, carbon	methylcobalamin:coenzyme M methyltransferase	mtbA, CBO1495	-0.0589837	0.663237	0.887607	-2.73224	2.53e-11	4.73e-10	2	1	2	42
CBO3228	CAL84790	1.3.01	Cell processes	Chaperones	ATP-dependent protease La	lonA, CBO3228	-0.078942	0.473555	0.792548	-2.71491	9.02e-15	8.25e-13	2	1	2	43
CBO3255	CAL84816	4.1.07	Cell envelope	G+ exported/lipoprotein	lipoprotein	CBO3255	-0.204503	0.44311	0.770927	-2.60867	5.71e-09	4.84e-08	2	1	2	44
CBO1153	CAL82705	1.6.03	Adaptation	Fe storage	ABC transporter substrate-binding protein	CBO1153	-0.185636	0.312115	0.661318	-2.71591	1.17e-12	3.74e-11	2	1	2	45
CBO0065	CAL81621	3.4.02	Degradation of small molecules	Amino acids	arginine deiminase	arcA1, CBO0065	-0.226947	0.335602	0.682991	-2.68678	4.34e-10	5.21e-09	2	1	2	46
CBO1982	CAL83525	7.0.0	Not classified	Not classified (included putative assignments)	radical SAM domain protein	CBO1982	-0.133478	0.59451	0.857447	-2.81819	9.94e-09	7.87e-08	2	1	2	47
CBO3067	CAL84630	1.5.05	Transport/binding proteins	Other	preprotein translocase subunit YajC	yajC, CBO3067	-0.146908	0.538255	0.827603	-2.76396	1.04e-08	8.16e-08	2	1	2	48
CBO1971	CAL83513	1.5.02	Transport/binding proteins	Cations	ABC transporter ATP-binding protein	CBO1971	-0.15593	0.413749	0.74792	-2.7734	1.27e-10	1.82e-09	2	1	2	49
CBO0391	CAL81944	0.0.02	Unknown function	Conserved in other than E.coli	hypothetical protein	CBO0391	-0.354963	0.13158	0.42207	-2.63716	1.69e-09	1.67e-08	2	1	2	50
CBO0950	CAL82504	3.2.03	Biosynthesis of cofactors, carriers	Cobalamin	cobalt-precorrin-6x reductase	cbiJ, CBO0950	-0.369781	0.286161	0.634627	-2.69472	1.65e-11	3.3e-10	2	1	2	51
CBO1643	CAL83178	3.5.04	Energy metabolism, carbon	Fermentation	NADH-dependent butanol dehydrogenase	CBO1643	-0.369413	0.336461	0.683542	-2.88971	3e-07	1.67e-06	2	1	2	52
CBO1522	CAL83063	1.5.0	Transport/binding proteins	Transport/binding proteins	C4-dicarboxylate transporter/malic acid transport protein	CBO1522	-0.432006	0.083485	0.323051	-2.907	4.47e-11	7.56e-10	2	1	2	53
CBO1458	CAL83001	4.1.09	Cell envelope	G+ peptidoglycan, teichoic acid	UDP-N-acetylmuramoyl-tripeptide--D-alanyl-D- alanine ligase	murF, CBO1458	-0.403221	0.0151061	0.0986412	-2.80721	6.05e-10	6.95e-09	2	1	2	54
CBO3629	CAL85187	3.5.04	Energy metabolism, carbon	Fermentation	2-hydroxyacyl-CoA dehydratase subunit beta	CBO3629	-0.404885	0.0368825	0.18639	-2.83247	2.74e-12	7.52e-11	2	1	2	55
CBOP15	CAL81548	1.4.01	Protection responses	Cell killing	putative bacteriocin biosynthesis protein	CBOP15	-0.421867	0.0534688	0.240411	-2.8229	1.32e-09	1.36e-08	2	1	2	56
CBO0973	CAL82526	1.6.03	Adaptation	Fe storage	iron chelate uptake ABC transporter FeCT family, permease	CBO0973	-0.317887	0.139927	0.436863	-2.97788	6.1e-11	9.87e-10	2	1	2	57
CBOP17	CAL81550	1.4.01	Protection responses	Cell killing	TldD family protein	CBOP17	-0.331229	0.079393	0.313258	-2.97935	9.19e-11	1.39e-09	2	1	2	58
CBO2594	CAL84152	3.1.02	Amino acid biosynthesis	Arginine	carbamate kinase	arcC, CBO2594	-0.263936	0.3151	0.664353	-2.90803	6.96e-10	7.86e-09	2	1	2	59
CBO0661	CAL82213	4.1.06	Cell envelope	G+ membrane	hypothetical protein	CBO0661	-0.21267	0.306631	0.655988	-2.92709	1.01e-11	2.19e-10	2	1	2	60
CBO1407	CAL82951	3.5.04	Energy metabolism, carbon	Fermentation	NADH-dependent butanol dehydrogenase	bdh, CBO1407	-0.228491	0.432246	0.76261	-2.92428	3.68e-09	3.28e-08	2	1	2	61
CBO1491	CAL83033	3.5.0	Energy metabolism, carbon	Energy metabolism, carbon	(Fe-S)-binding protein	CBO1491	-0.116294	0.66919	0.88941	-2.95602	1.79e-10	2.43e-09	2	1	2	62
CBO3190	CAL84751	0.0.02	Unknown function	Conserved in other than E.coli	hypothetical protein	CBO3190	-0.159641	0.33813	0.684651	-2.91429	2.12e-13	9.8e-12	2	1	2	63
CBO0368	CAL81921	3.5.03	Energy metabolism, carbon	Electron transport	RnfABCDGE type electron transport complex subunit C	rnfC, CBO0368	-0.23063	0.558343	0.8381	-2.97912	3.1e-07	1.73e-06	2	1	2	64
CBO1898	CAL83439	3.1.05	Amino acid biosynthesis	Chorismate	3-dehydroquinate dehydratase	aroQ, CBO1898	-0.157073	0.310439	0.659473	-3.00347	4.04e-08	2.73e-07	2	1	2	65
CBO2825	CAL84388	4.1.06	Cell envelope	G+ membrane	hypothetical protein	CBO2825	-0.203805	0.246536	0.591242	-3.03338	3.57e-13	1.52e-11	2	1	2	66
CBO3105	CAL84668	4.1.04	Cell envelope	Surface polysaccharides & antigens	polysaccharide biosynthesis protein	wzx, CBO3105	0.524523	0.0253536	0.144614	-2.29744	2.09e-09	2.01e-08	2	2	3	67
CBO2881	CAL84445	3.4.05	Degradation of small molecules	Other	xanthine dehydrogenase, molybdopterin-binding subunit	xdhAC, CBO2881	0.655904	0.00216584	0.0227986	-2.00275	3.91e-09	3.48e-08	2	2	3	68
CBO1588	CAL83127	1.5.01	Transport/binding proteins	Amino acids and amines	arginine/ornithine antiporter	arcD, CBO1588	0.379558	0.111803	0.385674	-2.0306	1.77e-11	3.48e-10	2	2	3	69
CBO0060	CAL81616	0.0.02	Unknown function	Conserved in other than E.coli	hypothetical protein	CBO0060	0.111633	0.631788	0.874211	-2.46216	1.77e-09	1.75e-08	2	2	3	70
CBO2859	CAL84425	2.2.11	Macromolecule synthesis, modification	RNA synthesis, modification, DNA transcription	23S rRNA (uracil-5-)-methyltransferase RumA	CBO2859	0.20666	0.19203	0.518243	-2.4619	2.91e-10	3.66e-09	2	2	3	71
CBO3474	CAL85035	4.2.02	Ribosome constituents	Ribosomal proteins - synthesis, modification	30S ribosomal protein S3	rpsC, CBO3474	0.198095	0.355033	0.70089	-2.51472	2.89e-06	1.32e-05	2	2	3	72
CBO0003	CAL81557	7.0.0	Not classified	Not classified (included putative assignments)	S4 domain-containing protein	CBO0003	-0.160804	0.496616	0.804626	-2.04497	4.08e-08	2.76e-07	2	2	3	73
CBO3445	CAL85005	4.2.02	Ribosome constituents	Ribosomal proteins - synthesis, modification	30S ribosomal protein S9	rpsI, CBO3445	-0.237791	0.120491	0.401392	-2.06167	9.5e-11	1.43e-09	2	2	3	74
CBO3098	CAL84661	4.1.04	Cell envelope	Surface polysaccharides & antigens	exopolysaccharide biosynthesis family protein	wzy, CBO3098	0.0840726	0.612043	0.865177	-2.0648	2.09e-09	2.01e-08	2	2	3	75
CBO2512A	CAL84064	2.2.11	Macromolecule synthesis, modification	RNA synthesis, modification, DNA transcription	DNA-directed RNA polymerase subunit omega	rpoZ, CBO2512A	0.0178945	0.930911	0.984023	-2.02486	2.88e-05	0.000108175	2	2	3	76
CBO1221	CAL82769	4.1.06	Cell envelope	G+ membrane	hypothetical protein	CBO1221	-0.0477132	0.803075	0.944412	-2.04926	3.46e-09	3.1e-08	2	2	3	77
CBO3418	CAL84978	3.4.03	Degradation of small molecules	Carbon compounds	L-iditol 2-dehydrogenase	CBO3418	0.244762	0.311606	0.66095	-2.15244	9.47e-07	4.77e-06	2	2	3	78
CBO1587	CAL83126	3.4.02	Degradation of small molecules	Amino acids	arginine deiminase	arcA2, CBO1587	0.236743	0.485021	0.798838	-2.23968	5.07e-05	0.000182813	2	2	3	79
CBO0921	CAL82474	3.2.06	Biosynthesis of cofactors, carriers	Heme, porphyrin	uroporphyrinogen III synthase/methyltransferase	hemD, CBO0921	0.14576	0.590379	0.855235	-2.21527	9.79e-08	6.08e-07	2	2	3	80
CBO3489	CAL85049	4.2.02	Ribosome constituents	Ribosomal proteins - synthesis, modification	50S ribosomal protein L7/L12	rplL, CBO3489	0.0995915	0.612823	0.86556	-2.1244	1.25e-09	1.29e-08	2	2	3	81
CBO3419	CAL84979	6.5.0	Regulation	Others	glucitol operon regulator	sorC, CBO3419	0.117424	0.490666	0.801181	-2.16346	4.43e-05	0.000160967	2	2	3	82
CBO3245	CAL84807	3.5.04	Energy metabolism, carbon	Fermentation	2-hydroxyacyl-CoA dehydratase subunit beta	CBO3245	0.0750046	0.622915	0.870467	-2.27875	2.67e-12	7.38e-11	2	2	3	83
CBO2451	CAL84001	1.5.05	Transport/binding proteins	Other	signal recognition particle-docking protein FtsY	CBO2451	0.0952844	0.619551	0.868199	-2.32583	1.2e-10	1.74e-09	2	2	3	84
CBO2134	CAL83675	4.1.05	Cell envelope	Surface structures	hypothetical protein	CBO2134	-0.0492252	0.852259	0.959598	-2.29197	4.26e-08	2.87e-07	2	2	3	85
CBO1649	CAL83184	5.1.02	Laterally acquired elements	Phage-related functions and prophages	phage surface protein	CBO1649	-0.0444115	0.818045	0.948849	-2.13825	9.83e-09	7.79e-08	2	2	3	86
CBO0452	CAL82005	4.1.09	Cell envelope	G+ peptidoglycan, teichoic acid	D-alanine--D-alanine ligase	ddlB, ddl, CBO0452	-0.0300012	0.865003	0.964986	-2.19182	5.05e-07	2.69e-06	2	2	3	87
CBO1494	CAL83036	3.5.0	Energy metabolism, carbon	Energy metabolism, carbon	dimethylamine corrinoid protein	mtbC, CBO1494	-0.112569	0.599627	0.859547	-2.49595	3.56e-10	4.38e-09	2	2	3	88
CBO0492	CAL82046	5.1.05	Laterally acquired elements	Pathogenicity island-related functions	ABC transporter ATP-binding protein	sagG, CBO0492	-0.148367	0.477311	0.795207	-2.49773	2.13e-10	2.8e-09	2	2	3	89
CBO3055	CAL84618	2.2.01	Macromolecule synthesis, modification	Amino acyl tRNA synthesis; tRNA modification	histidyl-tRNA synthetase	hisS, CBO3055	-0.176748	0.285958	0.63462	-2.45962	2.82e-12	7.67e-11	2	2	3	90
CBO3236	CAL84798	3.7.02	Nucleotide biosynthesis	Pyrimidine ribonucleotide biosynthesis	dihydroorotate dehydrogenase 1B	pyrD, CBO3236	-0.125959	0.744974	0.922882	-2.45091	8.82e-08	5.53e-07	2	2	3	91
CBO3466	CAL85026	4.2.02	Ribosome constituents	Ribosomal proteins - synthesis, modification	50S ribosomal protein L6	rplF, CBO3466	-0.126118	0.788054	0.937707	-2.46095	3.99e-05	0.000146164	2	2	3	92
CBO0952	CAL82506	3.2.03	Biosynthesis of cofactors, carriers	Cobalamin	anaerobic sirohydrochlorin cobaltochelatase	cbiK, CBO0952	-0.309804	0.0357029	0.18275	-2.38551	1.19e-08	9.23e-08	2	2	3	93
CBO1151	CAL82703	1.5.0	Transport/binding proteins	Transport/binding proteins	ABC transporter substrate-binding lipoprotein	CBO1151	-0.320023	0.0620239	0.265031	-2.44738	7.13e-11	1.12e-09	2	2	3	94
CBO1800	CAL83339	2.2.03	Macromolecule synthesis, modification	DNA - replication, repair, restriction/modification	DNA mismatch repair protein MutS	mutS, CBO1800	-0.148116	0.31337	0.662652	-2.33366	1.48e-10	2.05e-09	2	2	3	95
CBO1879	CAL83420	7.0.0	Not classified	Not classified (included putative assignments)	ATP-NAD kinase	CBO1879	-0.192266	0.453323	0.778221	-2.36618	1.45e-08	1.1e-07	2	2	3	96
CBO1896	CAL83437	0.0.02	Unknown function	Conserved in other than E.coli	hypothetical protein	CBO1896	-0.228241	0.370881	0.714008	-2.43516	8.06e-09	6.57e-08	2	2	3	97
CBO1878	CAL83419	6.5.0	Regulation	Others	arginine repressor ArgR	argR, CBO1878	-0.209507	0.150027	0.453162	-2.40116	1.04e-09	1.1e-08	2	2	3	98
CBO2488	CAL84038	7.0.0	Not classified	Not classified (included putative assignments)	putative proline reductase (partial)	prdA4, CBO2488	-0.227523	0.410539	0.745371	-2.40126	3.64e-08	2.49e-07	2	2	3	99
CBO0924	CAL82477	3.2.03	Biosynthesis of cofactors, carriers	Cobalamin	cobyrinic acid a,c-diamide synthase	cobB, cbiA, CBO0924	-0.165077	0.355332	0.70089	-2.22459	9.93e-11	1.48e-09	2	2	3	100
CBO1828A	CAL83368	0.0.0	Unknown function	Unknown function, no known homologues	hypothetical protein	CBO1828A	-0.217036	0.0840975	0.324612	-2.16407	5.67e-06	2.43e-05	2	2	3	101
CBO2471	CAL84021	0.0.02	Unknown function	Conserved in other than E.coli	hypothetical protein	CBO2471	-0.214045	0.375382	0.718435	-2.19691	1.78e-09	1.76e-08	2	2	3	102
CBO0489	CAL82043	5.1.05	Laterally acquired elements	Pathogenicity island-related functions	streptolysin associated protein SagD	sagD, CBO0489	-0.236695	0.167668	0.481144	-2.26127	2.94e-11	5.37e-10	2	2	3	103
CBO2613	CAL84171	0.0.0	Unknown function	Unknown function, no known homologues	hypothetical protein	CBO2613	-0.273035	0.0832389	0.322673	-2.27214	1.07e-12	3.54e-11	2	2	3	104
CBO3563	CAL85123	3.1.08	Amino acid biosynthesis	Glutamine	glutamine synthetase	glnA, CBO3563	-0.234185	0.425324	0.757469	-2.22103	2.93e-07	1.64e-06	2	2	3	105
CBO1554	CAL83094	0.0.02	Unknown function	Conserved in other than E.coli	6-pyruvoyl tetrahydrobiopterin synthase	CBO1554	-0.258487	0.232759	0.573609	-2.23882	4.21e-12	1.06e-10	2	2	3	106
CBO3119	CAL84682	7.0.0	Not classified	Not classified (included putative assignments)	dehydrogenase, FMN-dependent	CBO3119	-0.246601	0.189418	0.514033	-2.22749	1.88e-10	2.52e-09	2	2	3	107
CBO3329	CAL84887	2.2.10	Macromolecule synthesis, modification	Proteins - translation and modification	peptide chain release factor 3	prfC, tos, miaD, CBO3329	-0.251527	0.322143	0.671555	-2.23136	2.87e-08	2.02e-07	2	2	3	108
CBO1402	CAL82946	1.5.0	Transport/binding proteins	Transport/binding proteins	polar amino acid ABC transporter ATP-binding protein	CBO1402	-0.41343	0.00679651	0.0544586	-2.06429	5.37e-11	8.79e-10	2	2	3	109
CBO1451	CAL82995	7.0.0	Not classified	Not classified (included putative assignments)	GTP-dependent nucleic acid-binding protein EngD	ychF, CBO1451	-0.396954	0.0716072	0.292545	-2.12144	4.1e-09	3.62e-08	2	2	3	110
CBO2435	CAL83985	4.2.02	Ribosome constituents	Ribosomal proteins - synthesis, modification	30S ribosomal protein S2	rpsB, CBO2435	-0.425127	0.0563806	0.249359	-2.15997	3.36e-09	3.01e-08	2	2	3	111
CBOP19	CAL81552	1.4.01	Protection responses	Cell killing	ABC-transporter	CBOP19	-0.453148	0.0101085	0.0733415	-2.17811	2.26e-10	2.97e-09	2	2	3	112
CBO2743	CAL84304	1.1.01	Cell processes	Chemotaxis and mobility	flagellar motor switch protein	fliY, cheD, CBO2743	-0.368798	0.0610832	0.262283	-2.25709	2.46e-10	3.19e-09	2	2	3	113
CBO3287	CAL84845	3.5.03	Energy metabolism, carbon	Electron transport	electron transfer flavoprotein subunit beta	etfB2, CBO3287	-0.350223	0.101672	0.363721	-2.3354	2.48e-12	6.99e-11	2	2	3	114
CBO3295	CAL84853	3.3.11	Central intermediary metabolism	Nucleotide interconversions	GMP synthase	guaA, CBO3295	-0.484878	0.0633543	0.268952	-2.29124	7.8e-11	1.21e-09	2	2	3	115
CBO0917	CAL82469	1.5.02	Transport/binding proteins	Cations	cobalt transport protein CbiM	cbiM, CBO0917A	-0.446279	0.0266544	0.148928	-2.24538	2.48e-10	3.22e-09	2	2	3	116
CBO3101	CAL84664	4.1.04	Cell envelope	Surface polysaccharides & antigens	glycoside hydrolase family protein	CBO3101	-0.427755	0.0106838	0.0764578	-2.28404	5.33e-12	1.28e-10	2	2	3	117
CBO3059	CAL84622	6.5.0	Regulation	Others	GTP pyrophosphokinase	relA, CBO3059	-1.34282	1.38e-06	7.12e-05	-2.08095	9.29e-09	7.43e-08	2	2	4	118
CBO1107	CAL82660	4.1.07	Cell envelope	G+ exported/lipoprotein	ABC transporter solute-binding protein	CBO1107	-1.37271	1.89e-07	1.6e-05	-2.10577	2.11e-10	2.78e-09	2	2	4	119
CBO2071	CAL83610	2.2.11	Macromolecule synthesis, modification	RNA synthesis, modification, DNA transcription	putative RNA methyltransferase (partial CDS)	CBO2071	-1.12613	1.04e-06	5.71e-05	-2.24293	2.29e-09	2.17e-08	2	2	4	120
CBO1247	CAL82797	0.0.0	Unknown function	Unknown function, no known homologues	hypothetical protein	CBO1247	-1.038	1.45e-05	0.000438248	-2.26089	1.23e-10	1.78e-09	2	2	4	121
CBO3420	CAL84980	3.3.07	Central intermediary metabolism	Misc. glucose metabolism	phosphoglucosamine mutase	glmM, mrsA, CBO3420	-1.0737	4.51e-05	0.00112612	-2.28504	4.85e-09	4.19e-08	2	2	4	122
CBO2976	CAL84538	2.2.01	Macromolecule synthesis, modification	Amino acyl tRNA synthesis; tRNA modification	selenocysteine synthase	selA, fdhA, CBO2976	-1.22736	2.33e-08	3.28e-06	-2.30773	1.36e-09	1.4e-08	2	2	4	123
CBO1543	CAL83083	7.0.0	Not classified	Not classified (included putative assignments)	HDIG domain protein	CBO1543	-1.18477	3.67e-06	0.000152107	-2.3307	1.52e-11	3.06e-10	2	2	4	124
CBO3503	CAL85065	2.2.01	Macromolecule synthesis, modification	Amino acyl tRNA synthesis; tRNA modification	prolyl-tRNA synthetase	proS2, CBO3503	-1.19422	1.18e-06	6.28e-05	-2.34602	6.37e-12	1.49e-10	2	2	4	125
CBO3058	CAL84621	2.2.11	Macromolecule synthesis, modification	RNA synthesis, modification, DNA transcription	D-tyrosyl-tRNA(Tyr) deacylase	dtd, CBO3058	-0.987767	5.42e-06	0.00020176	-2.1111	4.54e-11	7.67e-10	2	2	4	126
CBO3143	CAL84705	1.3.01	Cell processes	Chaperones	Hsp33-like chaperonin	hslO, CBO3143	-1.00534	0.00201786	0.0215288	-2.09514	4.88e-07	2.61e-06	2	2	4	127
CBO3257	CAL84818	0.0.0	Unknown function	Unknown function, no known homologues	hypothetical protein	CBO3257	-0.867844	0.00264222	0.0265521	-2.08644	1.03e-09	1.09e-08	2	2	4	128
CBO3322	CAL84880	7.0.0	Not classified	Not classified (included putative assignments)	ribosomal-protein-alanine acetyltransferase	CBO3322	-0.842789	0.000147298	0.00287954	-2.12596	3.08e-10	3.85e-09	2	2	4	129
CBO2960	CAL84523	1.3.01	Cell processes	Chaperones	heat shock protein GrpE	grpE, CBO2960	-0.846453	0.000109202	0.00224348	-2.28552	1.06e-11	2.28e-10	2	2	4	130
CBO3607	CAL85167	2.2.03	Macromolecule synthesis, modification	DNA - replication, repair, restriction/modification	DNA replication protein DnaD	CBO3607	-0.930107	0.00742163	0.0582805	-2.21286	4.89e-06	2.13e-05	2	2	4	131
CBO1828	CAL83367	0.0.02	Unknown function	Conserved in other than E.coli	hypothetical protein	CBO1828	-0.570452	0.00181021	0.0198656	-2.258	1.32e-11	2.73e-10	2	2	4	132
CBO3237	CAL84799	3.7.02	Nucleotide biosynthesis	Pyrimidine ribonucleotide biosynthesis	dihydroorotate dehydrogenase electron transfer subunit	pyrK, CBO3237	-0.632321	0.0841898	0.32478	-2.21611	1.58e-06	7.6e-06	2	2	4	133
CBO3320	CAL84878	0.0.02	Unknown function	Conserved in other than E.coli	hypothetical protein	CBO3320	-0.625124	0.000373324	0.00599489	-2.24871	3.3e-12	8.71e-11	2	2	4	134
CBO2130	CAL83671	0.0.02	Unknown function	Conserved in other than E.coli	hypothetical protein	CBO2130	-0.708706	0.00168638	0.0188618	-2.23248	5.57e-10	6.48e-09	2	2	4	135
CBO0077	CAL81633	7.0.0	Not classified	Not classified (included putative assignments)	TatD family hydrolase	CBO0077	-0.777143	6.46e-05	0.00148652	-2.17467	1.05e-06	5.25e-06	2	2	4	136
CBO3265	CAL84824	2.2.01	Macromolecule synthesis, modification	Amino acyl tRNA synthesis; tRNA modification	aspartyl/glutamyl-tRNA amidotransferase subunit B	gatB, CBO3265	-0.661426	0.0035117	0.0329851	-2.08776	5.13e-08	3.38e-07	2	2	4	137
CBO3057	CAL84620	7.0.0	Not classified	Not classified (included putative assignments)	metallo-beta-lactamase	CBO3057	-0.624984	0.00129592	0.0153453	-2.17366	6.2e-11	1e-09	2	2	4	138
CBO0822	CAL82375	0.0.02	Unknown function	Conserved in other than E.coli	hypothetical protein	CBO0822	-0.661778	2.31e-05	0.000655039	-2.15511	1.37e-12	4.26e-11	2	2	4	139
CBO1500	CAL83042	1.5.01	Transport/binding proteins	Amino acids and amines	methionine ABC transporter permease	metI2, CBO1500	-0.522552	0.00517834	0.0438982	-2.40944	1.02e-11	2.2e-10	2	2	4	140
CBO1544	CAL83084	0.0.0	Unknown function	Unknown function, no known homologues	hypothetical protein	CBO1544	-0.611078	0.0170509	0.107763	-2.44092	8.71e-09	7.03e-08	2	2	4	141
CBO2243	CAL83782	7.0.0	Not classified	Not classified (included putative assignments)	uroporphyrinogen decarboxylase	CBO2243	-0.63091	0.00542078	0.0454081	-2.42894	2.43e-10	3.16e-09	2	2	4	142
CBO3106	CAL84669	4.1.04	Cell envelope	Surface polysaccharides & antigens	acetyltransferase	CBO3106	-0.641059	0.000483697	0.00734035	-2.43974	1.96e-12	5.8e-11	2	2	4	143
CBO1012	CAL82565	6.3.07	Regulation	MarR	MarR family transcriptional regulator	CBO1012	-0.53806	0.0251706	0.143883	-2.66365	9.6e-10	1.03e-08	2	2	4	144
CBO3450	CAL85010	1.5.0	Transport/binding proteins	Transport/binding proteins	cobalt transporter ATP-binding subunit	CBO3450	-0.448258	0.220986	0.558482	-2.5106	1e-06	5.02e-06	2	2	4	145
CBO2975	CAL84537	2.2.10	Macromolecule synthesis, modification	Proteins - translation and modification	selenocysteine-specific translation elongation factor	selB, CBO2975	-0.45537	0.078535	0.311625	-2.57491	2.5e-09	2.35e-08	2	2	4	146
CBO0136	CAL81691	3.3.11	Central intermediary metabolism	Nucleotide interconversions	thymidine kinase	tdK, CBO0136	-0.571191	0.164258	0.475434	-2.5031	4.53e-06	1.98e-05	2	2	4	147
CBO2705	CAL84266	4.1.04	Cell envelope	Surface polysaccharides & antigens	glycosyl transferase family protein	CBO2705	-0.551302	0.00124694	0.014968	-2.53412	3.85e-13	1.6e-11	2	2	4	148
CBO0919	CAL82472	3.2.06	Biosynthesis of cofactors, carriers	Heme, porphyrin	precorrin-2 dehydrogenase	CBO0919	-0.587424	0.00372086	0.0344442	-2.53899	1.42e-11	2.9e-10	2	2	4	149
CBO3060	CAL84623	3.3.11	Central intermediary metabolism	Nucleotide interconversions	adenine phosphoribosyltransferase	apt , CBO3060	-0.664389	0.0029227	0.0286036	-2.85786	8.86e-12	1.96e-10	2	2	4	150
CBO2955	CAL84518	7.0.0	Not classified	Not classified (included putative assignments)	MiaB family RNA modification protein	CBO2955	-0.910527	0.00671417	0.053983	-2.82255	1.42e-08	1.08e-07	2	2	4	151
CBO3068	CAL84631	2.2.11	Macromolecule synthesis, modification	RNA synthesis, modification, DNA transcription	queuine tRNA-ribosyltransferase	tgt, CBO3068	-0.85528	0.000867102	0.0113903	-2.76152	5.97e-11	9.68e-10	2	2	4	152
CBO1479	CAL83021	1.5.01	Transport/binding proteins	Amino acids and amines	uracil permease	pyrP, CBO1479	-0.823981	0.000828964	0.0110811	-2.81269	1.49e-11	3.03e-10	2	2	4	153
CBO1457	CAL83000	4.1.09	Cell envelope	G+ peptidoglycan, teichoic acid	UDP-N-acetylmuramoylalanyl-D-glutamate--2, 6-diaminopimelate ligase	murE, CBO1457	-1.01544	0.000646008	0.00915052	-2.66394	1.88e-09	1.84e-08	2	2	4	154
CBO0989	CAL82541	4.1.07	Cell envelope	G+ exported/lipoprotein	hypothetical protein	CBO0989	-1.01176	8.61e-05	0.0018621	-2.71412	4.7e-11	7.9e-10	2	2	4	155
CBO1846	CAL83386	1.5.0	Transport/binding proteins	Transport/binding proteins	ABC transporter ATP-binding protein	CBO1846	-1.16913	1.64e-06	8.17e-05	-2.51785	8.46e-12	1.88e-10	2	2	4	156
CBO2782	CAL84345	2.1.04	Macromolecule degradation	Degradation of proteins, peptides, glycoproteins	LD-carboxypeptidase	CBO2782	-1.0323	6.02e-07	3.8e-05	-2.45789	4.06e-13	1.65e-11	2	2	4	157
CBO2212	CAL83753	4.1.07	Cell envelope	G+ exported/lipoprotein	exported protein	CBO2212	-0.931036	2.59e-05	0.000714827	-2.51875	4.29e-12	1.07e-10	2	2	4	158
CBO2070	CAL83609	0.0.02	Unknown function	Conserved in other than E.coli	hypothetical protein	CBO2070	-0.967781	0.000859857	0.0113173	-2.51846	1.85e-10	2.48e-09	2	2	4	159
CBO3570	CAL85129	0.0.02	Unknown function	Conserved in other than E.coli	rRNA large subunit methyltransferase	CBO3570	-0.706084	4.76e-05	0.0011717	-2.58147	1.24e-12	3.95e-11	2	2	4	160
CBO3189	CAL84750	7.0.0	Not classified	Not classified (included putative assignments)	ATPase AAA	CBO3189	-0.776736	7.96e-05	0.0017563	-2.61532	7.84e-13	2.75e-11	2	2	4	161
CBO3102	CAL84665	4.1.04	Cell envelope	Surface polysaccharides & antigens	hypothetical protein	CBO3102	-0.794909	9.18e-05	0.00196761	-2.62981	2.51e-12	7.06e-11	2	2	4	162
CBO1478	CAL83020	6.5.0	Regulation	Others	bifunctional pyrimidine regulatory protein PyrR/uracil phosphoribosyltransferase	pyrR, CBO1478	-0.895656	0.00246128	0.0250863	-2.41798	1.44e-08	1.09e-07	2	2	4	163
CBO1897	CAL83438	2.2.10	Macromolecule synthesis, modification	Proteins - translation and modification	elongation factor P	efp, CBO1897	-0.754874	0.00360547	0.0336283	-2.47404	2.63e-12	7.31e-11	2	2	4	164
CBO1880	CAL83421	7.0.0	Not classified	Not classified (included putative assignments)	hemolysin A	CBO1880	-0.882377	0.000757058	0.010396	-2.50428	6.85e-10	7.76e-09	2	2	4	165
CBO2239	CAL83778	1.5.0	Transport/binding proteins	Transport/binding proteins	sodium extrusion ATP-binding protein NatA	CBO2239	-0.815944	0.000463365	0.00714199	-2.48618	1.61e-08	1.2e-07	2	2	4	166
CBO1400	CAL82944	7.0.0	Not classified	Not classified (included putative assignments)	aminotransferase, classes I and II	CBO1400	-0.832316	0.000127594	0.0025776	-2.53754	9.6e-12	2.1e-10	2	2	4	167

## Sheet: 4. k-means cluster 3
locus_tag	EMBL	Classnum	Main class	Subclass	Product	Gene symbol	1h_log2	1h_p-value	1h_FDR	5h_log2	5h_p-value	5h_FDR	k-means_cluster	hcl_subcluster	hcl_row
CBO1029	CAL82582	1.6.03	Adaptation	Fe storage	ferrous iron transport protein A	feoA, CBO1029	1.79713	3.31e-06	0.000141199	5.28028	2.54e-14	1.86e-12	3	1	1
CBO0612	CAL82165	4.1.06	Cell envelope	G+ membrane	hypothetical protein	CBO0612	1.79694	7.43e-06	0.000256977	5.23594	3.04e-13	1.33e-11	3	1	2
CBO1028	CAL82581	1.6.03	Adaptation	Fe storage	ferrous iron transport protein	CBO1028	1.71905	2.37e-05	0.000666393	5.02006	2.95e-11	5.37e-10	3	1	3
CBO0863	CAL82416	3.4.05	Degradation of small molecules	Other	secreted lipase	lipA, CBO0863	1.70243	3.43e-06	0.000144348	4.81758	1.78e-13	8.53e-12	3	1	4
CBO1254	CAL82806	3.3.15	Central intermediary metabolism	Pool, multipurpose conversions of intermediate metabolism	thioredoxin reductase	trxB1, CBO1254	1.6541	8.5e-07	4.97e-05	5.56314	8.93e-15	8.22e-13	3	1	5
CBO2775	CAL84338	2.1.03	Macromolecule degradation	Degradation of polysaccharides	polysaccharide deacetylase	CBO2775	1.63437	3.26e-07	2.4e-05	5.52442	2.08e-14	1.61e-12	3	1	6
CBO2670	CAL84231	3.1.02	Amino acid biosynthesis	Arginine	argininosuccinate synthase	argG, CBO2670	1.57481	3.32e-06	0.000141199	5.53901	3.33e-15	3.72e-13	3	1	7
CBO3405	CAL84965	4.2.02	Ribosome constituents	Ribosomal proteins - synthesis, modification	30S ribosomal protein S4	rpsD, ramA, CBO3405	1.23412	7.08e-05	0.00159976	5.11098	1.58e-14	1.26e-12	3	1	8
CBO0477	CAL82030	6.3.13	Regulation	ArsR	transcription regulator ArsR	CBO0477	1.40001	8.5e-05	0.00184923	4.92408	4.01e-13	1.65e-11	3	1	9
CBO1253	CAL82805	3.2.11	Biosynthesis of cofactors, carriers	Pyridine nucleotide	NADP-dependent glyceraldehyde-3-phosphate dehydrogenase	gapN, CBO1253	1.08264	2.81e-06	0.000124291	5.41306	1.2e-17	5.09e-15	3	1	10
CBO2669	CAL84230	3.1.02	Amino acid biosynthesis	Arginine	argininosuccinate lyase	argH, CBO2669	0.784906	0.00139218	0.0163012	5.30508	3.29e-15	3.7e-13	3	1	11
CBO0560	CAL82114	4.1.06	Cell envelope	G+ membrane	ABC transporter permease	CBO0560	2.70007	2.58e-07	2.01e-05	4.88225	7.46e-13	2.65e-11	3	1	12
CBO1386	CAL82929	0.0.02	Unknown function	Conserved in other than E.coli	hypothetical protein	CBO1386	2.70666	4.24e-11	3.7e-08	4.74226	1.65e-15	2.2e-13	3	1	13
CBO0559	CAL82113	1.5.0	Transport/binding proteins	Transport/binding proteins	ABC transporter ATP-binding protein	CBO0559	2.95211	3.6e-10	1.77e-07	4.61234	7.49e-14	4.46e-12	3	1	14
CBO1637	CAL83172	1.6.02	Adaptation	Osmotic adaptation	glycine betaine/L-proline ABC transporter permease/substrate-binding protein	opuCB, opuBB, CBO1637	2.25036	1.16e-07	1.08e-05	4.80252	3.84e-13	1.6e-11	3	1	15
CBO0558A	CAL82112	6.3.03	Regulation	GntR	GntR family transcriptional regulator	CBO0558A	3.08595	4.77e-08	5.4e-06	5.13963	1.07e-11	2.28e-10	3	1	16
CBO1636	CAL83171	1.6.02	Adaptation	Osmotic adaptation	glycine betaine/L-proline ABC transporter ATP-binding protein	opuCA, opuBA, proV, CBO1636	2.69426	2.78e-07	2.12e-05	5.34354	7.14e-13	2.56e-11	3	1	17
CBO0282	CAL81834	1.6.01	Adaptation	Adaptations, atypical conditions	cold shock protein	cspA, CBO0282	2.71757	1.18e-09	3.94e-07	3.86717	2.86e-12	7.76e-11	3	1	18
CBO3196	CAL84757	6.5.0	Regulation	Others	sigma-54 dependent transcriptional regulator	CBO3196	1.62671	4.9e-06	0.00018635	4.12305	1.52e-11	3.06e-10	3	1	19
CBO2789	CAL84352	1.5.0	Transport/binding proteins	Transport/binding proteins	ABC transporter ATP-binding protein	CBO2789	0.541023	0.0100566	0.0731335	4.61347	2.24e-15	2.8e-13	3	1	20
CBO1076	CAL82630	1.6.03	Adaptation	Fe storage	ferrous iron transport protein B	feoB, CBO1076	0.463705	0.0185963	0.114809	4.68891	3.01e-16	6.04e-14	3	1	21
CBO2787	CAL84350	4.1.06	Cell envelope	G+ membrane	membrane protein, VanZ family	CBO2787	0.453015	0.00296648	0.02896	4.45591	5.41e-15	5.57e-13	3	1	22
CBO1031	CAL82584	4.1.06	Cell envelope	G+ membrane	hypothetical protein	CBO1031	0.861093	0.000609593	0.00877691	4.24608	9.77e-15	8.79e-13	3	1	23
CBO2790	CAL84353	6.3.03	Regulation	GntR	GntR family transcriptional regulator	CBO2790	0.128503	0.291818	0.641031	4.58428	1.64e-18	1.03e-15	3	1	24
CBO2791	CAL84354	4.1.06	Cell envelope	G+ membrane	membrane protein, VanZ family	CBO2791	-0.108575	0.557261	0.837638	4.51092	7.25e-16	1.12e-13	3	1	25
CBO1030	CAL82583	1.6.03	Adaptation	Fe storage	ferrous iron transport protein B	feoB, CBO1030	0.583581	0.0163892	0.104844	6.10763	1.05e-16	2.64e-14	3	2	26
CBO3404	CAL84964	0.0.02	Unknown function	Conserved in other than E.coli	hypothetical protein	CBO3404	0.584135	0.0101659	0.0735881	6.06446	2.38e-17	9.12e-15	3	2	27
CBO0347	CAL81900	4.1.06	Cell envelope	G+ membrane	hypothetical protein	CBO0347	0.546154	0.00302272	0.0293271	5.91877	4.86e-19	4.25e-16	3	2	28
CBO2778	CAL84341	3.5.03	Energy metabolism, carbon	Electron transport	flavodoxin	CBO2778	0.981022	8.53e-06	0.000289342	6.39261	3.05e-19	3.57e-16	3	2	29
CBO0346	CAL81899	0.0.02	Unknown function	Conserved in other than E.coli	hypothetical protein	CBO0346	0.920589	0.000292156	0.00497045	6.11301	1.44e-18	9.88e-16	3	2	30
CBO1589	CAL83128	1.4.01	Protection responses	Cell killing	hemolysin	CBO1589	2.0662	6.24e-09	1.28e-06	6.51374	9.93e-18	4.46e-15	3	2	31
CBO2585	CAL84143	3.6.0	Fatty acid biosynthesis	Fatty acid biosynthesis	3-oxoacyl-ACP synthase	CBO2585	-0.0957944	0.506048	0.809161	6.75248	3.81e-21	2e-17	3	2	32
CBO2584	CAL84142	3.6.0	Fatty acid biosynthesis	Fatty acid biosynthesis	acyl-CoA synthetase	CBO2584	-0.215728	0.17428	0.492132	6.65604	1.32e-19	1.73e-16	3	2	33
[truncated: 10 more rows]

## Sheet: 5. k-means cluster 4
locus_tag	EMBL	Classnum	Main class	Subclass	Product	Gene symbol	1h_log2	1h_p-value	1h_FDR	5h_log2	5h_p-value	5h_FDR	k-means_cluster	hcl_subcluster	hcl_row
[truncated: 44 more rows]

[truncated: 3 more sheets: 6. 1-h affected genes, 7. 5-h affected genes, 8. Functional categories]
